# Supplementary material for: M1 microglia disrupt the barrier function of retinal microvascular endothelial cells via ANGPT2/TIE2 axis
Source: Research Square preprint supplement (doi:10.21203/rs.3.rs-7163478/v1), 2025-07-24
Supplement: Supplementary file 1 [file 23979ced3d7bded7eed9f844.xlsx]

## Sheet: Date Formatting
GeneID	GeneName	Chr	Strand	Start	End	Annotation	Class	FC (hRMECs with M1/M0 HMC3)	pvalue
ENSG00000251537	AC005324.3	17	-	15571491	15651653	novel tripartite motif-containing 16 (TRIM16) and CMT1A duplicated region transcript 1 (CDRT1) protein	protein_coding	873.925	3.96188e-11
ENSG00000137868	STRA6	15	-	74179466	74212267	signaling receptor and transporter of retinol STRA6 [Source:HGNC Symbol;Acc:HGNC:30650]	protein_coding	361.151	1.26915e-07
ENSG00000180834	MAP6D1	3	-	183815922	183825594	MAP6 domain containing 1 [Source:HGNC Symbol;Acc:HGNC:25753]	protein_coding	312.622	6.26198e-07
ENSG00000286004	AC124944.3	3	+	195900986	195903417	novel transcript, antisense to TNK2	lncRNA	202.285	4.7575e-06
ENSG00000258130	AC106782.1	16	-	30204316	30209071	coiled-coil domain containing 101 (CCDC101) pseudogene	transcribed_unprocessed_pseudogene	200.773	3.48984e-06
ENSG00000258873	DUXA	19	-	57154021	57167485	double homeobox A [Source:HGNC Symbol;Acc:HGNC:32179]	protein_coding	159.518	1.15547e-05
ENSG00000285895	AP003557.2	11	-	58491773	58493480	novel transcript	lncRNA	129.8	3.04597e-05
ENSG00000121966	CXCR4	2	-	136114349	136118149	C-X-C motif chemokine receptor 4 [Source:HGNC Symbol;Acc:HGNC:2561]	protein_coding	123.506	5.09502e-05
ENSG00000149656	LINC00266-1	20	+	64290385	64313132	long intergenic non-protein coding RNA 266-1 [Source:HGNC Symbol;Acc:HGNC:16202]	lncRNA	123.258	4.71262e-05
ENSG00000286437	AF111169.4	14	+	76790267	76793807	novel transcript, antisense to ANGEL1	lncRNA	120.437	4.25984e-05
ENSG00000043355	ZIC2	13	+	99981784	99986765	Zic family member 2 [Source:HGNC Symbol;Acc:HGNC:12873]	protein_coding	95.1234	0.000137302
ENSG00000254936	AF131215.4	8	-	11123381	11126064	novel transcript	lncRNA	94.6635	0.000125529
ENSG00000215283	HMGB3P24	9	-	36303499	36304924	high mobility group box 3 pseudogene 24 [Source:HGNC Symbol;Acc:HGNC:39316]	processed_pseudogene	90.7813	0.000151046
ENSG00000255526	NEDD8-MDP1	14	-	24213955	24232352	NEDD8-MDP1 readthrough [Source:HGNC Symbol;Acc:HGNC:39551]	protein_coding	90.7813	0.000151046
ENSG00000260949	AP006545.1	8	+	38062881	38063791	novel transcript, overlapping to EIF4EBP1	lncRNA	90.0534	0.000183902
ENSG00000070018	LRP6	12	-	12116025	12267044	LDL receptor related protein 6 [Source:HGNC Symbol;Acc:HGNC:6698]	protein_coding	88.5954	0.000259745
ENSG00000249755	AC083829.1	4	+	88527160	88528170	CD53 molecule (CD53) pseudogene	processed_pseudogene	88.5484	0.000225945
ENSG00000274204	AL138689.1	13	-	106506046	106506713	novel transcript, sense intronic to EFNB2	lncRNA	86.3996	0.000213239
ENSG00000236878	MTATP6P26	2	+	120211054	120211715	MT-ATP6 pseudogene 26 [Source:HGNC Symbol;Acc:HGNC:52182]	processed_pseudogene	85.1206	0.000200201
ENSG00000232600	TONSL-AS1	8	+	144437675	144439971	TONSL antisense RNA 1 [Source:HGNC Symbol;Acc:HGNC:51556]	lncRNA	84.8947	0.000254675
ENSG00000073754	CD5L	1	-	157830911	157898256	CD5 molecule like [Source:HGNC Symbol;Acc:HGNC:1690]	protein_coding	84.0101	0.000219276
ENSG00000283914	AC087645.4	17	+	78248193	78251440	novel transcript	lncRNA	83.876	0.000245158
ENSG00000270809	CHCHD2P11	13	-	42181465	42181921	coiled-coil-helix-coiled-coil-helix domain containing 2 pseudogene 11 [Source:HGNC Symbol;Acc:HGNC:49029]	processed_pseudogene	82.193	0.000230203
ENSG00000221819	GAS8-AS1	16	-	90028908	90029901	GAS8 antisense RNA 1 [Source:HGNC Symbol;Acc:HGNC:1197]	lncRNA	75.4331	0.000505967
ENSG00000258982	AL133523.1	14	-	100207407	100238555	novel transcript, antisense to YY1	lncRNA	74.2295	0.000561953
ENSG00000287043	AL392083.2	10	-	1201406	1208389	novel transcript, sense intronic to ADARB2	lncRNA	73.6044	0.000359906
ENSG00000269646	AC010487.1	19	+	52923382	52924075	novel transcript	lncRNA	70.3143	0.000453029
ENSG00000220925	IGBP1-AS2	X	-	70148582	70149654	IGBP1 antisense RNA 2 [Source:HGNC Symbol;Acc:HGNC:40294]	lncRNA	69.6918	0.000450255
ENSG00000287362	AC103563.9	2	-	95067074	95076900	novel transcript	lncRNA	69.6918	0.000450255
ENSG00000272217	AL645940.1	6	-	33246075	33246856	novel transcript	lncRNA	66.6854	0.000730648
ENSG00000274001	AL512506.1	13	-	43877715	43878163	novel transcript, sense intronic to CCDC122	lncRNA	66.6854	0.000730648
ENSG00000286755	AC135893.1	3	-	198027956	198035970	novel transcript, antisense to LMLN	lncRNA	65.0154	0.000584124
ENSG00000232234	AL355499.1	6	+	8102711	8343139	novel transcript	lncRNA	64.0953	0.000622313
ENSG00000214369	CYB5AP2	2	+	169790093	169790885	cytochrome b5 type A pseudogene 2 [Source:HGNC Symbol;Acc:HGNC:2573]	processed_pseudogene	62.9617	0.000697329
ENSG00000259138	AL049780.2	14	+	75127153	75136930	novel transcript, antisense to NEK9 and TMED10	lncRNA	62.9617	0.000697329
ENSG00000237493	AC034102.1	12	-	55980432	55981035	RAB13 member RAS oncogene family pseudogene	processed_pseudogene	62.109	0.000797894
ENSG00000259196	HMBOX1-IT1	8	+	28949676	28955955	HMBOX1 intronic transcript 1 [Source:HGNC Symbol;Acc:HGNC:43632]	lncRNA	62.109	0.000797894
ENSG00000273100	AL596442.2	6	+	170178681	170179660	novel transcript	lncRNA	62.109	0.000797894
ENSG00000120156	TEK	9	+	27109141	27230174	TEK receptor tyrosine kinase [Source:HGNC Symbol;Acc:HGNC:11724]	protein_coding	61.105	0.000745754
ENSG00000224031	TCEAL3-AS1	X	-	103626076	103626492	TCEAL3 antisense RNA 1 [Source:HGNC Symbol;Acc:HGNC:41191]	lncRNA	57.9087	0.00131458
ENSG00000213763	ACTBP2	5	+	77784881	77786003	ACTB pseudogene 2 [Source:HGNC Symbol;Acc:HGNC:135]	processed_pseudogene	57.1397	0.000975546
ENSG00000226533	BTBD9-AS1	6	+	38481692	38482531	BTBD9 antisense RNA 1 [Source:HGNC Symbol;Acc:HGNC:40959]	lncRNA	57.1397	0.000975546
ENSG00000274949	AL109804.1	20	+	3811384	3823882	novel transcript	lncRNA	52.8113	0.00152874
ENSG00000235090	RPL7L1P3	7	+	75922755	75923443	ribosomal protein L7 like 1 pseudogene 3 [Source:HGNC Symbol;Acc:HGNC:39485]	processed_pseudogene	51.6791	0.0013724
ENSG00000224137	LINC01857	2	+	207662375	207667024	long intergenic non-protein coding RNA 1857 [Source:HGNC Symbol;Acc:HGNC:52673]	lncRNA	50.5782	0.0015474
ENSG00000226158	CLCP2	13	+	114306646	114307066	Charcot-Leyden crystal protein pseudogene 2 [Source:HGNC Symbol;Acc:HGNC:42536]	processed_pseudogene	50.5782	0.0015474
ENSG00000270604	HCG17	6	-	30234039	30326134	HLA complex group 17 [Source:HGNC Symbol;Acc:HGNC:31339]	lncRNA	48.9896	0.00184063
ENSG00000185674	LYG2	2	-	99242246	99255282	lysozyme g2 [Source:HGNC Symbol;Acc:HGNC:29615]	protein_coding	47.8349	0.00179676
ENSG00000258949	AL049870.3	14	-	44898908	44911863	novel transcript, antisense to C14orf28	lncRNA	47.8349	0.00179676
ENSG00000254616	AP001775.1	11	+	134173095	134173680	Zinc finger protein 628 (ZNF628) pseudogene	processed_pseudogene	46.8451	0.00197786
ENSG00000258096	AC025031.2	12	+	46371463	46373778	novel transcript, antisense to SLC38A2	lncRNA	46.8451	0.00197786
ENSG00000263847	AP005899.1	18	-	9112404	9115877	novel transcript, antisense to NDUFV2	lncRNA	44.7632	0.0027066
ENSG00000236794	BCRP8	22	-	23179918	23180172	BCR pseudogene 8 [Source:HGNC Symbol;Acc:HGNC:39076]	processed_pseudogene	44.7341	0.00326959
ENSG00000232815	DUX4L50	9	-	63817748	63818462	double homeobox 4 like 50 (pseudogene) [Source:HGNC Symbol;Acc:HGNC:51788]	unprocessed_pseudogene	44.4938	0.0024584
ENSG00000249119	MTND6P4	5	+	134924123	134924644	MT-ND6 pseudogene 4 [Source:HGNC Symbol;Acc:HGNC:39467]	processed_pseudogene	44.4938	0.0024584
ENSG00000134243	SORT1	1	-	109309568	109397918	sortilin 1 [Source:HGNC Symbol;Acc:HGNC:11186]	protein_coding	44.4938	0.0024584
ENSG00000276282	AC022960.2	18	-	31895745	31896410	novel transcript, sense intronic to TRAPPC8	lncRNA	44.4938	0.0024584
ENSG00000226773	AL663109.1	1	+	92203148	92203991	zinc finger pseudogene	processed_pseudogene	43.9314	0.0024245
ENSG00000272656	AC024933.1	3	-	139349024	139349371	novel transcript, antisense to MRPS22	lncRNA	43.9314	0.0024245
ENSG00000236154	AL450311.1	10	+	69575807	69577154	novel transcript	lncRNA	41.8937	0.00301857
ENSG00000262408	AC015912.2	17	-	56884639	56884819	family with sequence similarity 89, member B (FAM89B) pseudogene	processed_pseudogene	40.391	0.00425575
ENSG00000237899	AL031289.1	1	-	40669089	40687588	novel transcript	lncRNA	40.3344	0.00361853
ENSG00000243141	RPL23AP66	12	+	12338776	12339254	ribosomal protein L23a pseudogene 66 [Source:HGNC Symbol;Acc:HGNC:35940]	processed_pseudogene	40.3344	0.00361853
ENSG00000230320	BEND7P1	X	+	102705784	102706240	BEN domain containing 7 pseudogene 1 [Source:HGNC Symbol;Acc:HGNC:51362]	processed_pseudogene	39.9512	0.00339905
ENSG00000271414	AC093107.2	7	+	135650972	135651416	MYC associated factor X, pseudogene	processed_pseudogene	39.9512	0.00339905
ENSG00000275612	AC104237.2	11	-	7698951	7699393	novel transcript, sense intronic to OVCH2	lncRNA	39.9512	0.00339905
ENSG00000276058	STMN1P1	12	-	31715342	31715781	stathmin 1 pseudogene 1 [Source:HGNC Symbol;Acc:HGNC:44062]	processed_pseudogene	39.9512	0.00339905
ENSG00000177418	AC006001.1	7	-	66556889	66557362	novel pseudogene	processed_pseudogene	35.8687	0.00500952
ENSG00000219693	FGF7P8	9	+	62888535	62889921	fibroblast growth factor 7 pseudogene 8 [Source:HGNC Symbol;Acc:HGNC:34516]	unprocessed_pseudogene	35.8687	0.00500952
ENSG00000220105	AL353151.1	9	-	4781475	4782078	ribosomal protein S5 (RPS5) pseudogene	processed_pseudogene	35.3446	0.00491234
ENSG00000220392	FCF1P5	6	+	111353702	111354183	FCF1 pseudogene 5 [Source:HGNC Symbol;Acc:HGNC:44617]	processed_pseudogene	35.3446	0.00491234
ENSG00000228079	AC012368.2	2	-	64086353	64088246	novel transcript	lncRNA	35.3446	0.00491234
ENSG00000229083	PSMA6P2	X	+	12825840	12826833	proteasome subunit alpha 6 pseudogene 2 [Source:HGNC Symbol;Acc:HGNC:39607]	processed_pseudogene	35.3446	0.00491234
ENSG00000232946	AL354707.2	9	+	6675284	6675614	60S ribosomal protein L35a (RPL35A) pseudogene	processed_pseudogene	35.3446	0.00491234
ENSG00000240122	FABP5P11	22	-	16595089	16595485	fatty acid binding protein 5 pseudogene 11 [Source:HGNC Symbol;Acc:HGNC:19328]	processed_pseudogene	35.3446	0.00491234
ENSG00000270606	PPIAP52	17	+	8560471	8560962	peptidylprolyl isomerase A pseudogene 52 [Source:HGNC Symbol;Acc:HGNC:53676]	processed_pseudogene	35.3446	0.00491234
ENSG00000288080	AC005104.2	2	-	241360891	241372749	novel transcript, antisense to FARP2	lncRNA	35.3446	0.00491234
ENSG00000203897	SPATA42	1	+	108857217	108858524	spermatogenesis associated 42 [Source:HGNC Symbol;Acc:HGNC:41198]	lncRNA	34.4512	0.00535365
ENSG00000275527	AC100835.2	15	-	74598919	74599397	novel transcript	lncRNA	34.4512	0.00535365
ENSG00000278017	AC064801.1	18	-	62525919	62526325	novel transcript, antisense to ZCCHC2	lncRNA	34.4512	0.00535365
ENSG00000123384	LRP1	12	+	57128483	57213361	LDL receptor related protein 1 [Source:HGNC Symbol;Acc:HGNC:6692]	protein_coding	33.1602	0.00654918
ENSG00000248895	AC068531.2	17	+	48881122	48881316	pseudogene similar to part of ribosomal protein L18a LOC100136354	processed_pseudogene	31.6435	0.00790463
ENSG00000262633	AC005670.2	17	+	46923133	47049932	novel protein	protein_coding	31.3937	0.000182715
ENSG00000237668	RPS15AP38	22	-	36421273	36421644	ribosomal protein S15a pseudogene 38 [Source:HGNC Symbol;Acc:HGNC:36523]	processed_pseudogene	31.3513	0.00725273
ENSG00000239528	RPS14P8	5	+	116562562	116562930	ribosomal protein S14 pseudogene 8 [Source:HGNC Symbol;Acc:HGNC:37027]	processed_pseudogene	31.3513	0.00725273
ENSG00000215771	LRRC37A14P	22	-	41189727	41190188	leucine rich repeat containing 37 member A14, pseudogene [Source:HGNC Symbol;Acc:HGNC:43818]	processed_pseudogene	30.647	0.00752857
ENSG00000230911	PPIHP1	11	-	112029858	112030367	peptidylprolyl isomerase H pseudogene 1 [Source:HGNC Symbol;Acc:HGNC:31355]	processed_pseudogene	30.647	0.00752857
ENSG00000258566	AC007376.1	14	-	76690139	76690742	H1 histone family, member O, oocyte-specific (H1FOO) pseudogene	processed_pseudogene	30.647	0.00752857
ENSG00000259817	AC087565.1	16	+	73812560	73816054	novel transcript	lncRNA	30.647	0.00752857
ENSG00000262869	AC099684.3	17	-	2019952	2023664	novel transcript, sense intronic to RTN4RL1	lncRNA	30.647	0.00752857
ENSG00000233200	LINC02634	10	-	35219894	35230598	long intergenic non-protein coding RNA 2634 [Source:HGNC Symbol;Acc:HGNC:54117]	lncRNA	27.2205	0.0114758
ENSG00000225080	PFN1P4	1	+	148129497	148129898	profilin 1 pseudogene 4 [Source:HGNC Symbol;Acc:HGNC:42992]	processed_pseudogene	26.7578	0.0111446
ENSG00000230604	TSEN15P2	1	+	51859778	51860135	tRNA splicing endonuclease subunit 15 pseudogene 2 [Source:HGNC Symbol;Acc:HGNC:43963]	processed_pseudogene	26.7578	0.0111446
ENSG00000259410	AC009292.2	15	+	67832725	67873866	novel transcript	lncRNA	26.7578	0.0111446
ENSG00000271181	Z99916.2	22	-	25179309	25179554	stathmin-like 3 (STMN3) pseudogene	processed_pseudogene	26.7578	0.0111446
ENSG00000269001	AC092070.2	19	+	53197111	53214522	zinc finger protein 818, pseudogene	transcribed_unprocessed_pseudogene	26.5311	1.70072e-08
ENSG00000185055	EFCAB10	7	-	105565120	105600875	EF-hand calcium binding domain 10 [Source:HGNC Symbol;Acc:HGNC:34531]	protein_coding	25.2533	0.00048351
ENSG00000236467	KCNMA1-AS1	10	+	76888044	76980624	KCNMA1 antisense RNA 1 [Source:HGNC Symbol;Acc:HGNC:51213]	lncRNA	22.1011	0.00105736
ENSG00000213025	COX20P1	10	+	68632371	68632727	COX20 pseudogene 1 [Source:HGNC Symbol;Acc:HGNC:31435]	processed_pseudogene	22.0453	0.0186097
ENSG00000229497	AC005189.1	7	+	43767290	43767599	novel pseudogene similar to LOC203547	processed_pseudogene	22.0453	0.0186097
ENSG00000235191	NUCB1-AS1	19	-	48910930	48918891	NUCB1 antisense RNA 1 [Source:HGNC Symbol;Acc:HGNC:40419]	lncRNA	22.0453	0.0186097
ENSG00000253399	AC078852.1	4	+	1358479	1359461	novel transcript	lncRNA	22.0453	0.0186097
ENSG00000286248	AC069209.2	12	-	121177919	121191477	novel transcript, antisense to P2RX7	lncRNA	21.6657	0.025109
ENSG00000223725	AC009226.1	2	-	207239864	207529795	novel transcript	lncRNA	20.3853	0.000490139
ENSG00000288208	AL451136.1	1	-	45329262	45491155	novel protein	protein_coding	20.0428	0.0122079
ENSG00000254310	AC025755.1	5	+	78753596	78753873	SMT3 suppressor of mif two 3 homolog 2 (S. cerevisiae) (SUMO2) pseudogene	processed_pseudogene	18.1712	0.0297048
ENSG00000276822	AC009053.4	16	-	74393076	74393183	phospholipase A2, group X (PLA2G10) pseudogene	unprocessed_pseudogene	18.1712	0.0297048
ENSG00000188585	CLEC20A	1	-	178479247	178499634	C-type lectin domain containing 20A [Source:HGNC Symbol;Acc:HGNC:34521]	protein_coding	18.1224	0.0323272
ENSG00000094755	GABRP	5	+	170763350	170814047	gamma-aminobutyric acid type A receptor subunit pi [Source:HGNC Symbol;Acc:HGNC:4089]	protein_coding	17.1142	0.00130859
ENSG00000228097	MTATP6P11	9	+	5099560	5100229	MT-ATP6 pseudogene 11 [Source:HGNC Symbol;Acc:HGNC:52057]	unprocessed_pseudogene	16.9291	0.00323077
ENSG00000283930	AL117339.4	10	+	38094368	38360098	novel transcript	protein_coding	16.7634	0.0448201
ENSG00000165935	SMCO2	12	+	27466810	27502185	single-pass membrane protein with coiled-coil domains 2 [Source:HGNC Symbol;Acc:HGNC:34448]	protein_coding	15.2079	0.00153606
ENSG00000259024	TVP23C-CDRT4	17	-	15436021	15563561	TVP23C-CDRT4 readthrough [Source:HGNC Symbol;Acc:HGNC:42961]	protein_coding	14.0279	2.79316e-06
ENSG00000175311	ANKS4B	16	+	21233699	21253850	ankyrin repeat and sterile alpha motif domain containing 4B [Source:HGNC Symbol;Acc:HGNC:26795]	protein_coding	13.7017	0.00275452
ENSG00000228487	AL450263.1	9	-	127213783	127221907	novel transcript, antisense to RALGPS1	lncRNA	13.2104	0.00722165
ENSG00000282787	AL157888.1	10	+	125162379	125162971	novel transcript	lncRNA	13.0666	0.00779201
ENSG00000214773	AC112512.1	3	-	47601715	47604677	novel transcript, sense intronic SMARCC1	lncRNA	13.0593	0.00291243
ENSG00000288056	AL023806.4	6	-	145784406	145786559	novel transcript	lncRNA	13.0473	0.00463791
ENSG00000250472	TRIM36-IT1	5	-	115148764	115149644	TRIM36 intronic transcript 1 [Source:HGNC Symbol;Acc:HGNC:41422]	lncRNA	12.5498	0.0055882
ENSG00000157343	ARMC12	6	+	35737032	35749079	armadillo repeat containing 12 [Source:HGNC Symbol;Acc:HGNC:21099]	protein_coding	12.3333	0.014733
ENSG00000145428	RNF175	4	-	153710160	153760024	ring finger protein 175 [Source:HGNC Symbol;Acc:HGNC:27735]	protein_coding	12.327	0.00254751
ENSG00000217733	CCT7P1	6	+	149879962	149881572	chaperonin containing TCP1 subunit 7 pseudogene 1 [Source:HGNC Symbol;Acc:HGNC:35149]	processed_pseudogene	12.2165	0.00555821
ENSG00000257008	GPR142	17	+	74367407	74372622	G protein-coupled receptor 142 [Source:HGNC Symbol;Acc:HGNC:20088]	protein_coding	12.1687	0.0117998
ENSG00000088386	SLC15A1	13	-	98683801	98752672	solute carrier family 15 member 1 [Source:HGNC Symbol;Acc:HGNC:10920]	protein_coding	12.1192	0.00441698
ENSG00000284640	AL590434.1	1	-	35141515	35146435	novel transcript	lncRNA	12.0297	0.00551788
ENSG00000239677	PDZRN3-AS1	3	+	73621713	73626796	PDZRN3 antisense RNA 1 [Source:HGNC Symbol;Acc:HGNC:40814]	lncRNA	11.6056	0.0284095
ENSG00000231407	GORAB-AS1	1	-	170460453	170532647	GORAB antisense RNA 1 [Source:HGNC Symbol;Acc:HGNC:54051]	lncRNA	11.4999	0.00887093
ENSG00000260490	MYL12BP1	15	+	42571927	42572433	myosin light chain 12B pseudogene 1 [Source:HGNC Symbol;Acc:HGNC:51649]	processed_pseudogene	11.3737	0.00608022
ENSG00000259286	AC087639.1	15	+	68833830	68834749	cytokine induced apoptosis inhibitor 1 (CIAPIN1)	processed_pseudogene	11.2802	0.0122491
ENSG00000268117	VN1R84P	19	-	21719801	21720035	vomeronasal 1 receptor 84 pseudogene [Source:HGNC Symbol;Acc:HGNC:37404]	unprocessed_pseudogene	11.1131	0.0140445
ENSG00000254593	OR7E126P	11	+	71903194	71904081	olfactory receptor family 7 subfamily E member 126 pseudogene [Source:HGNC Symbol;Acc:HGNC:15304]	unprocessed_pseudogene	10.9641	0.00616873
ENSG00000124664	SPDEF	6	-	34537802	34556333	SAM pointed domain containing ETS transcription factor [Source:HGNC Symbol;Acc:HGNC:17257]	protein_coding	10.6783	0.0317348
ENSG00000228397	LINC01635	1	-	22023990	22026048	long intergenic non-protein coding RNA 1635 [Source:HGNC Symbol;Acc:HGNC:52422]	lncRNA	10.6646	0.00819036
ENSG00000204528	PSORS1C3	6	-	31173735	31177899	psoriasis susceptibility 1 candidate 3 [Source:HGNC Symbol;Acc:HGNC:17203]	lncRNA	10.6071	0.0030467
ENSG00000268941	LINC01711	20	+	58634772	58635738	long intergenic non-protein coding RNA 1711 [Source:HGNC Symbol;Acc:HGNC:28663]	lncRNA	10.4728	0.00594098
ENSG00000256325	AC025423.1	12	+	68828118	68828553	novel transcript	lncRNA	10.4215	0.0157921
ENSG00000232630	PRPS1P2	9	+	125150653	125151589	phosphoribosyl pyrophosphate synthetase 1 pseudogene 2 [Source:HGNC Symbol;Acc:HGNC:9464]	processed_pseudogene	10.2804	0.0119626
ENSG00000251447	AC107027.2	3	-	131537571	131537685	pseudogene similar to part of copine IV	unprocessed_pseudogene	10.1497	0.0226227
ENSG00000273305	AC009237.15	2	+	95537969	95538469	novel transcript	lncRNA	10.146	0.00688276
ENSG00000267368	UPK3BL1	7	-	102637025	102642791	uroplakin 3B like 1 [Source:HGNC Symbol;Acc:HGNC:37278]	protein_coding	10.042	0.0107537
ENSG00000286828	AC008883.3	5	+	97183827	97216074	novel transcript	lncRNA	9.9219	0.00907526
ENSG00000271579	AC078880.3	12	-	115299588	115300708	novel transcript	lncRNA	9.75715	0.00143451
ENSG00000272518	AC036214.2	8	-	79956465	79957381	novel transcript, sense intronic to MRPS28	lncRNA	9.60076	0.00981458
ENSG00000260927	AC009107.2	16	+	58129519	58163246	uncharacterized LOC101927556 [Source:NCBI gene (formerly Entrezgene);Acc:101927556]	lncRNA	9.44426	0.000158389
ENSG00000267571	AC104532.2	19	-	5911578	5913899	novel transcript, antisense to CAPS	lncRNA	9.25272	0.0198114
ENSG00000267682	AC016590.2	19	+	37337236	37337743	novel transcript, sense intronic to HKR1	lncRNA	9.21459	0.0247989
ENSG00000256377	AC009509.2	12	-	27696388	27710803	novel transcript	lncRNA	8.9351	0.0204895
ENSG00000250602	AC093535.1	5	-	126372477	126509021	novel transcript, antisense to GRAMD3	lncRNA	8.87803	0.043718
ENSG00000227355	AL359644.1	9	+	121369893	121463370	novel transcript, antisense STOM	lncRNA	8.87223	0.0150113
ENSG00000227253	AL158834.2	10	+	32266289	32269474	novel transcript	lncRNA	8.77717	0.0104186
ENSG00000231305	AC112484.1	3	-	128860620	128871540	novel transcript	lncRNA	8.70495	0.0218024
ENSG00000270035	AL359881.2	1	-	7698303	7698872	novel transcript	lncRNA	8.69263	0.0289234
ENSG00000230257	NFE4	7	+	102973522	102988856	nuclear factor, erythroid 4 [Source:HGNC Symbol;Acc:HGNC:29902]	lncRNA	8.64649	0.0179818
ENSG00000236908	LINC02827	12	+	3318718	3325343	long intergenic non-protein coding RNA 2827 [Source:HGNC Symbol;Acc:HGNC:54358]	lncRNA	8.61561	0.0471395
ENSG00000273350	AC004832.5	22	+	30420512	30420912	novel transcript, sense intronic to SEC14L2	lncRNA	8.53787	0.0303075
ENSG00000066468	FGFR2	10	-	121478332	121598458	fibroblast growth factor receptor 2 [Source:HGNC Symbol;Acc:HGNC:3689]	protein_coding	8.41277	0.00810961
ENSG00000235172	LINC01366	5	+	170307722	170335508	long intergenic non-protein coding RNA 1366 [Source:HGNC Symbol;Acc:HGNC:27416]	lncRNA	8.41175	0.0453052
ENSG00000285565	AL671762.1	6	+	31828834	31839719	novel transcript	lncRNA	8.28708	0.0170665
ENSG00000134873	CLDN10	13	+	95433604	95579759	claudin 10 [Source:HGNC Symbol;Acc:HGNC:2033]	protein_coding	8.23242	0.0146727
ENSG00000178055	PRSS42P	3	-	46829542	46834095	serine protease 42, pseudogene [Source:HGNC Symbol;Acc:HGNC:30716]	transcribed_unitary_pseudogene	8.2154	0.0468207
ENSG00000269148	AC092301.1	19	+	45830164	45831108	novel transcript, antisense to SYMPK	lncRNA	8.1869	0.0357117
ENSG00000231123	SPATA20P1	21	-	38238227	38238664	spermatogenesis associated 20 pseudogene 1 [Source:HGNC Symbol;Acc:HGNC:39636]	processed_pseudogene	8.10315	0.0380251
ENSG00000272862	AC106052.1	4	-	41988741	41989237	novel transcript	lncRNA	8.04401	0.0354358
ENSG00000256358	RPL31P57	17	-	64308316	64308690	ribosomal protein L31 pseudogene 57 [Source:HGNC Symbol;Acc:HGNC:35703]	processed_pseudogene	7.94918	0.0246366
ENSG00000286296	AC018445.6	18	+	79539574	79540840	novel transcript	lncRNA	7.86282	0.00182915
ENSG00000276188	AC069234.4	12	+	120709112	120709523	novel transcript	lncRNA	7.85469	0.0194084
ENSG00000146410	MTFR2	6	-	136231024	136250335	mitochondrial fission regulator 2 [Source:HGNC Symbol;Acc:HGNC:21115]	protein_coding	7.8273	0.0380474
ENSG00000242578	AC073288.2	3	+	170410512	170418615	novel transcript	lncRNA	7.70746	0.0232006
ENSG00000286757	AL137139.2	13	-	99841879	99957167	novel transcript, antisense to CLYBL	lncRNA	7.65012	0.0422615
ENSG00000226556	NPM1P49	X	-	47438736	47439774	nucleophosmin 1 pseudogene 49 [Source:HGNC Symbol;Acc:HGNC:45228]	processed_pseudogene	7.56587	0.0411609
ENSG00000266644	AC103810.5	17	+	64899766	64900716	novel transcript, antisense to LRRC37A3	lncRNA	7.54209	0.0200695
ENSG00000254598	CSNK2A3	11	-	11351942	11353250	casein kinase 2 alpha 3 [Source:HGNC Symbol;Acc:HGNC:2458]	protein_coding	7.53742	0.0283412
ENSG00000157653	C9orf43	9	+	113410054	113429690	chromosome 9 open reading frame 43 [Source:HGNC Symbol;Acc:HGNC:23570]	protein_coding	7.51656	0.0189645
ENSG00000177112	IRAG1-AS1	11	+	10541258	10599936	IRAG1 antisense RNA 1 [Source:HGNC Symbol;Acc:HGNC:43434]	lncRNA	7.39947	0.00215679
ENSG00000224691	AL133553.1	1	-	186176814	186177302	novel transcript	lncRNA	7.31902	0.0233361
ENSG00000214676	RPL9P16	4	+	168755816	168756382	ribosomal protein L9 pseudogene 16 [Source:HGNC Symbol;Acc:HGNC:36851]	processed_pseudogene	7.27811	0.0237002
ENSG00000225096	AL445250.1	6	+	57961438	58438364	novel transcript	lncRNA	7.22725	0.0321435
ENSG00000226253	MRPL35P3	10	+	74527584	74527947	mitochondrial ribosomal protein L35 pseudogene 3 [Source:HGNC Symbol;Acc:HGNC:23731]	processed_pseudogene	7.02268	0.0250827
ENSG00000270069	MIR222HG	X	-	45745211	45770274	miR222/221 cluster host gene [Source:HGNC Symbol;Acc:HGNC:49555]	lncRNA	6.97724	0.0245429
ENSG00000255121	CCDC84-DT	11	-	118994824	118998004	CCDC84 divergent transcript [Source:HGNC Symbol;Acc:HGNC:54215]	lncRNA	6.92471	0.0231198
ENSG00000285839	AL445685.3	1	-	52020153	52033350	novel transcript	protein_coding	6.8586	0.00681956
ENSG00000237212	AL449403.2	9	+	96065740	96101912	novel transcript	lncRNA	6.84699	0.00858773
ENSG00000232891	AL450344.3	6	+	150600834	150605850	novel transcript	lncRNA	6.74133	0.0264103
ENSG00000242791	AC117395.1	3	+	149976755	149979355	novel transcript	lncRNA	6.6669	0.029744
ENSG00000258896	SCOCP1	14	+	60158976	60159324	short coiled-coil protein pseudogene 1 [Source:HGNC Symbol;Acc:HGNC:20339]	processed_pseudogene	6.60524	0.0462801
ENSG00000176919	C8G	9	+	136945185	136946975	complement C8 gamma chain [Source:HGNC Symbol;Acc:HGNC:1354]	protein_coding	6.57648	0.0387167
ENSG00000158482	SNX29P1	16	+	21376648	21386064	sorting nexin 29 pseudogene 1 [Source:HGNC Symbol;Acc:HGNC:31913]	unprocessed_pseudogene	6.53979	0.0271309
ENSG00000161958	FGF11	17	+	7438273	7444937	fibroblast growth factor 11 [Source:HGNC Symbol;Acc:HGNC:3667]	protein_coding	6.44377	0.00184398
ENSG00000213297	ZNF625-ZNF20	19	-	12132117	12156731	ZNF625-ZNF20 readthrough (NMD candidate) [Source:HGNC Symbol;Acc:HGNC:48368]	protein_coding	6.43711	0.00106879
ENSG00000224232	KCTD5P1	2	+	241478316	241478993	KCTD5 pseudogene 1 [Source:HGNC Symbol;Acc:HGNC:54736]	processed_pseudogene	6.38334	0.0460025
ENSG00000255100	AP003119.2	11	-	76782581	76783062	novel transcript	lncRNA	6.37026	0.0443612
ENSG00000276593	AC022306.3	15	+	49353485	49354034	novel transcript, sense intronic to GALK2	lncRNA	6.23512	0.0370184
ENSG00000182578	CSF1R	5	-	150053291	150113372	colony stimulating factor 1 receptor [Source:HGNC Symbol;Acc:HGNC:2433]	protein_coding	6.12237	0.0448958
ENSG00000212710	CTAGE1	18	-	22413599	22417915	cutaneous T cell lymphoma-associated antigen 1 [Source:HGNC Symbol;Acc:HGNC:24346]	protein_coding	6.0997	0.0433885
ENSG00000259940	AC109449.1	16	-	27213308	27214993	novel transcript, antisense to JMJD5	lncRNA	6.08495	0.0105208
ENSG00000268945	AC010422.2	19	-	12682693	12687279	novel transcript	lncRNA	5.9541	0.0361201
ENSG00000285928	AC103591.4	1	-	78022565	78024861	novel transcript	lncRNA	5.89574	0.0393913
ENSG00000007908	SELE	1	-	169722640	169764705	selectin E [Source:HGNC Symbol;Acc:HGNC:10718]	protein_coding	5.84049	7.06106e-05
ENSG00000230519	HMGB1P49	12	+	27702338	27702906	high mobility group box 1 pseudogene 49 [Source:HGNC Symbol;Acc:HGNC:39282]	processed_pseudogene	5.80535	0.0168074
ENSG00000223502	AL731537.1	10	-	51062579	51068553	novel transcript	lncRNA	5.79031	0.0337999
ENSG00000272265	AC034236.3	5	-	116078110	116078570	novel transcript	lncRNA	5.78121	0.0457728
ENSG00000224331	AC019181.1	2	-	164687287	164687596	pseudogene similar to part of ribosomal protein L10 (RPL10)	processed_pseudogene	5.60992	0.0112975
ENSG00000130957	FBP2	9	-	94558720	94593824	fructose-bisphosphatase 2 [Source:HGNC Symbol;Acc:HGNC:3607]	protein_coding	5.54151	0.0254725
ENSG00000253623	AC009879.1	8	+	66480648	66481486	TAF9 RNA polymerase II, TATA box binding protein (TBP)-associated factor, 32kDa (TAF9) pseudogene	processed_pseudogene	5.52697	0.0137946
ENSG00000228507	DAP3P2	2	+	171491422	171491931	death associated protein 3 pseudogene 2 [Source:HGNC Symbol;Acc:HGNC:29762]	processed_pseudogene	5.39821	0.0102248
ENSG00000249786	EAF1-AS1	3	-	15436171	15455940	EAF1 antisense RNA 1 [Source:HGNC Symbol;Acc:HGNC:42328]	lncRNA	5.31311	0.00532636
ENSG00000171496	OR1L8	9	-	122567117	122583384	olfactory receptor family 1 subfamily L member 8 [Source:HGNC Symbol;Acc:HGNC:15110]	protein_coding	5.25981	0.0253685
ENSG00000147588	PMP2	8	-	81440326	81447439	peripheral myelin protein 2 [Source:HGNC Symbol;Acc:HGNC:9117]	protein_coding	5.20183	0.0486213
ENSG00000288547	C3orf36	3	-	133928145	133929812	chromosome 3 putative open reading frame 36 [Source:HGNC Symbol;Acc:HGNC:26170]	protein_coding	5.14316	0.0111763
ENSG00000228709	LINC02575	21	+	44485577	44490288	long intergenic non-protein coding RNA 2575 [Source:HGNC Symbol;Acc:HGNC:53747]	lncRNA	5.08747	0.0398227
ENSG00000189398	OR7E12P	11	-	3390780	3391752	olfactory receptor family 7 subfamily E member 12 pseudogene [Source:HGNC Symbol;Acc:HGNC:8383]	unprocessed_pseudogene	5.02856	0.0361635
ENSG00000219470	AL355802.1	6	-	43538822	43539703	40S ribosomal protein S2 (RPS2) pseudogene	processed_pseudogene	4.96549	0.018996
ENSG00000269949	AC069307.1	4	-	56960927	56961373	novel transcript	lncRNA	4.95175	0.0132771
ENSG00000272822	AC073610.2	12	-	48903503	48957365	novel protein	protein_coding	4.92918	0.0115472
ENSG00000279078	SND1-IT1	7	+	127997597	128000077	SND1 intronic transcript 1 [Source:HGNC Symbol;Acc:HGNC:24158]	lncRNA	4.91831	0.00862785
ENSG00000268119	AC010615.2	19	-	21444241	21463908	novel transcript	lncRNA	4.88622	0.0183715
ENSG00000286030	AC015911.10	17	-	35522279	35522969	schlafen family member pseudogene	transcribed_unprocessed_pseudogene	4.8731	0.0305772
ENSG00000228812	LAMA5-AS1	20	+	62352995	62356480	LAMA5 antisense RNA 1 [Source:HGNC Symbol;Acc:HGNC:40334]	lncRNA	4.8658	0.0497434
ENSG00000283900	TPTEP2-CSNK1E	22	-	38291918	38398522	TPTEP2-CSNK1E readthrough [Source:HGNC Symbol;Acc:HGNC:53829]	protein_coding	4.72986	0.00609202
ENSG00000251131	AC025171.3	5	+	43018429	43024678	novel transcript	lncRNA	4.72774	0.0230725
ENSG00000178150	ZNF114	19	+	48270081	48287608	zinc finger protein 114 [Source:HGNC Symbol;Acc:HGNC:12894]	protein_coding	4.72674	0.0139171
ENSG00000233072	RPS15AP6	1	-	21003550	21003934	ribosomal protein S15a pseudogene 6 [Source:HGNC Symbol;Acc:HGNC:35657]	processed_pseudogene	4.59569	0.0155704
ENSG00000228010	AC073343.2	7	+	6663974	6708901	novel transcript, antisense to ZNF12	lncRNA	4.50604	0.0314546
ENSG00000221857	AC020907.2	19	+	35138824	35151336	novel transcript	lncRNA	4.50198	0.00114004
ENSG00000270181	BIVM-ERCC5	13	+	102799110	102875994	BIVM-ERCC5 readthrough [Source:HGNC Symbol;Acc:HGNC:43690]	protein_coding	4.49869	0.000295523
ENSG00000067715	SYT1	12	+	78863993	79452008	synaptotagmin 1 [Source:HGNC Symbol;Acc:HGNC:11509]	protein_coding	4.48029	0.00597914
ENSG00000270431	AC005000.2	X	+	115659713	115660022	PHD finger protein 5A (PHF5A) pseudogene	processed_pseudogene	4.4765	0.00944458
ENSG00000188580	NKAIN2	6	+	123803865	124825640	sodium/potassium transporting ATPase interacting 2 [Source:HGNC Symbol;Acc:HGNC:16443]	protein_coding	4.45233	0.00823867
ENSG00000090512	FETUB	3	+	186635969	186653141	fetuin B [Source:HGNC Symbol;Acc:HGNC:3658]	protein_coding	4.44035	0.0146296
ENSG00000204131	NHSL2	X	+	71910818	72161750	NHS like 2 [Source:HGNC Symbol;Acc:HGNC:33737]	protein_coding	4.42426	0.0437734
ENSG00000248476	BACH1-IT1	21	+	29351634	29361894	BACH1 intronic transcript 1 [Source:HGNC Symbol;Acc:HGNC:40006]	lncRNA	4.37531	0.0224079
ENSG00000251405	AC016571.1	5	-	157363382	157365501	novel transcript, sense overlapping ADAM19	lncRNA	4.37497	0.0162115
ENSG00000235145	RPSAP16	1	+	179968686	179969506	ribosomal protein SA pseudogene 16 [Source:HGNC Symbol;Acc:HGNC:35478]	processed_pseudogene	4.35661	0.0241527
ENSG00000253767	PCDHGA8	5	+	141390157	141512979	protocadherin gamma subfamily A, 8 [Source:HGNC Symbol;Acc:HGNC:8706]	protein_coding	4.34601	0.0246922
ENSG00000241458	RPL7P19	5	+	138473744	138474361	ribosomal protein L7 pseudogene 19 [Source:HGNC Symbol;Acc:HGNC:36268]	processed_pseudogene	4.24353	0.0244037
ENSG00000237883	DGUOK-AS1	2	-	73947322	73981441	DGUOK antisense RNA 1 [Source:HGNC Symbol;Acc:HGNC:43441]	lncRNA	4.17706	0.0385478
ENSG00000277218	AL139123.1	10	-	130104569	130104998	novel transcript	lncRNA	4.15573	0.0356053
ENSG00000260439	LMF1-AS1	16	+	921033	934495	LMF1 antisense RNA 1 [Source:HGNC Symbol;Acc:HGNC:50469]	lncRNA	4.14876	0.0192491
ENSG00000240634	AC145285.1	16	-	28813980	28814673	ribosomal protein S15a (RPS15A) pseudogene	processed_pseudogene	4.12514	0.0155323
ENSG00000250290	NCAPGP1	8	-	120635558	120638204	non-SMC condensin I complex subunit G pseudogene 1 [Source:HGNC Symbol;Acc:HGNC:51904]	processed_pseudogene	4.06364	0.016472
ENSG00000229373	LINC00452	13	+	113888306	113923512	long intergenic non-protein coding RNA 452 [Source:HGNC Symbol;Acc:HGNC:42800]	lncRNA	4.06067	0.0115819
ENSG00000274849	AC023043.4	18	+	36189824	36190272	novel transcript, sense intronic to MOCOS	lncRNA	4.0573	0.0367728
ENSG00000228290	TBX18-AS1	6	+	84687712	84709578	TBX18 antisense RNA 1 [Source:HGNC Symbol;Acc:HGNC:52256]	lncRNA	4.03743	0.0279636
ENSG00000260244	AC104083.1	4	+	155734448	155737062	novel transcript, overlapping GUCY1A3	lncRNA	4.0234	0.00346667
ENSG00000276012	AL160153.1	13	+	101717564	101723106	novel transcript, antisense to FGF14	lncRNA	4.00287	0.0244186
ENSG00000265479	DTX2P1-UPK3BP1-PMS2P11	7	+	76959835	77043775	DTX2P1-UPK3BP1-PMS2P11 readthrough, transcribed pseudogene [Source:HGNC Symbol;Acc:HGNC:42360]	lncRNA	4.00095	0.00385126
ENSG00000135406	PRPH	12	+	49293252	49298686	peripherin [Source:HGNC Symbol;Acc:HGNC:9461]	protein_coding	3.98667	0.00473461
ENSG00000167995	BEST1	11	+	61950063	61965515	bestrophin 1 [Source:HGNC Symbol;Acc:HGNC:12703]	protein_coding	3.98662	0.0492176
ENSG00000274653	AC106782.5	16	+	30359825	30360336	novel transcript, antisense to TBC1D10B	lncRNA	3.98597	0.0176757
ENSG00000263244	AC087190.3	16	+	9104848	9113181	novel transcript, 3' overlapping chromosome 16 open reading frame 72	lncRNA	3.93627	0.0388396
ENSG00000227560	RPS15AP30	10	+	112987476	112987865	ribosomal protein S15a pseudogene 30 [Source:HGNC Symbol;Acc:HGNC:35495]	processed_pseudogene	3.9014	0.0427299
ENSG00000284874	AC000093.1	22	+	19717220	19724772	novel transcript	protein_coding	3.87576	0.000773539
ENSG00000283352	AL021368.4	6	-	57919912	57961382	novel transcript	lncRNA	3.83715	0.0227413
ENSG00000267581	AC011477.3	19	-	19761038	19821716	novel transcript	lncRNA	3.83357	0.0239989
ENSG00000237978	KCNMB2-AS1	3	-	178526505	178937352	KCNMB2 antisense RNA 1 [Source:HGNC Symbol;Acc:HGNC:51409]	lncRNA	3.7764	0.018161
ENSG00000233579	KRT8P15	2	-	202840331	202841781	keratin 8 pseudogene 15 [Source:HGNC Symbol;Acc:HGNC:33367]	processed_pseudogene	3.7383	0.0197445
ENSG00000264895	AC006141.1	17	-	51249579	51251748	novel transcript, sense intronic to MBTD1	lncRNA	3.71121	0.00610749
ENSG00000255986	MT1JP	16	+	56635739	56637086	metallothionein 1J, pseudogene [Source:HGNC Symbol;Acc:HGNC:7402]	transcribed_unprocessed_pseudogene	3.71022	0.0392
ENSG00000204950	LRRC10B	11	+	61508749	61511018	leucine rich repeat containing 10B [Source:HGNC Symbol;Acc:HGNC:37215]	protein_coding	3.66601	0.0383498
ENSG00000277245	AC084782.3	15	+	56447120	56447697	novel transcript, antisense to MNS1	lncRNA	3.65077	0.0438195
ENSG00000263531	AC130324.1	17	-	30863921	30864940	novel transcript, antisense ATAD5	lncRNA	3.63272	0.0192361
ENSG00000213033	AURKAP1	1	-	220266706	220267917	aurora kinase A pseudogene 1 [Source:HGNC Symbol;Acc:HGNC:18611]	transcribed_processed_pseudogene	3.61304	0.0431442
ENSG00000283045	AC103703.1	17	-	44486153	44486815	novel transcript, sense intronic to GPATCH8	lncRNA	3.59959	0.0384433
ENSG00000270277	AC009948.1	2	+	178548884	178550681	novel transcript, antisense to titin	lncRNA	3.59725	0.0499092
ENSG00000233996	KDM3AP1	2	-	189486480	189487992	KDM3A pseudogene 1 [Source:HGNC Symbol;Acc:HGNC:54795]	processed_pseudogene	3.59721	0.0325907
ENSG00000231948	HS1BP3-IT1	2	-	20590775	20592548	HS1BP3 intronic transcript 1 [Source:HGNC Symbol;Acc:HGNC:41474]	lncRNA	3.59062	0.0484416
ENSG00000229108	LINC02587	7	+	15688378	15696886	long intergenic non-protein coding RNA 2587 [Source:HGNC Symbol;Acc:HGNC:50672]	lncRNA	3.58909	0.0194453
ENSG00000271743	AF287957.1	8	-	6615604	6617198	novel transcript	lncRNA	3.5883	0.0436253
ENSG00000259248	USP3-AS1	15	-	63544247	63601589	USP3 antisense RNA 1 [Source:HGNC Symbol;Acc:HGNC:44140]	lncRNA	3.58114	0.00254028
ENSG00000168779	SHOX2	3	-	158095954	158106503	short stature homeobox 2 [Source:HGNC Symbol;Acc:HGNC:10854]	protein_coding	3.57988	0.00128387
ENSG00000101276	SLC52A3	20	-	760080	776015	solute carrier family 52 member 3 [Source:HGNC Symbol;Acc:HGNC:16187]	protein_coding	3.573	0.0132946
ENSG00000288550	AC018809.3	3	+	9929852	9945358	novel protein	protein_coding	3.5459	0.0486629
ENSG00000251450	RASGRF2-AS1	5	-	80947694	80960907	RASGRF2 antisense RNA 1 [Source:HGNC Symbol;Acc:HGNC:40499]	lncRNA	3.52831	0.0278851
ENSG00000100031	GGT1	22	+	24594811	24629005	gamma-glutamyltransferase 1 [Source:HGNC Symbol;Acc:HGNC:4250]	protein_coding	3.52391	0.00597773
ENSG00000248710	AC079594.2	3	-	160227454	160449829	TRIM59 and iFT80 readthrough	protein_coding	3.51217	0.0259909
ENSG00000260366	AC026803.1	19	+	48926171	48926444	novel transcript, overlapping NUCB1	lncRNA	3.46003	0.0487381
ENSG00000181097	LINC02878	8	+	143696154	143698413	long intergenic non-protein coding RNA 2878 [Source:HGNC Symbol;Acc:HGNC:54524]	lncRNA	3.44122	0.039752
ENSG00000246582	AC100861.1	8	+	23224471	23230926	novel transcript, antisense to TNFRSF10A	lncRNA	3.43973	0.0219716
ENSG00000288271	AL136981.4	9	+	92809388	92888693	novel transcript	lncRNA	3.40044	0.0491533
ENSG00000275152	CCL16	17	-	35976493	35981497	C-C motif chemokine ligand 16 [Source:HGNC Symbol;Acc:HGNC:10614]	protein_coding	3.34245	0.0267885
ENSG00000226766	FABP7P1	1	-	243624666	243625056	fatty acid binding protein 7 pseudogene 1 [Source:HGNC Symbol;Acc:HGNC:41951]	processed_pseudogene	3.29376	0.0392698
ENSG00000135702	CHST5	16	-	75528535	75535247	carbohydrate sulfotransferase 5 [Source:HGNC Symbol;Acc:HGNC:1973]	protein_coding	3.27886	0.0349069
ENSG00000070526	ST6GALNAC1	17	-	76624761	76643786	ST6 N-acetylgalactosaminide alpha-2,6-sialyltransferase 1 [Source:HGNC Symbol;Acc:HGNC:23614]	protein_coding	3.26968	0.0307401
ENSG00000255358	NDUFAF2P2	11	-	130285023	130285833	NDUFAF2 pseudogene 2 [Source:HGNC Symbol;Acc:HGNC:54723]	processed_pseudogene	3.21879	0.0301205
ENSG00000262700	AC133552.3	16	+	25093387	25095255	thyroid hormone receptor interactor 11 (TRIP11) pseudogene	processed_pseudogene	3.20674	0.045446
ENSG00000131015	ULBP2	6	+	149942014	149949235	UL16 binding protein 2 [Source:HGNC Symbol;Acc:HGNC:14894]	protein_coding	3.1978	0.0495724
ENSG00000154839	SKA1	18	+	50375040	50394168	spindle and kinetochore associated complex subunit 1 [Source:HGNC Symbol;Acc:HGNC:28109]	protein_coding	3.194	0.0369586
ENSG00000255435	AP001267.3	11	-	118510273	118531094	novel transcript, antisense to MLL and TTC36	lncRNA	3.18017	0.032059
ENSG00000236710	AC108448.2	11	-	3084393	3085443	proteasome (prosome, macropain) subunit, alpha type, 1 (PSMA1) pseudogene	processed_pseudogene	3.16857	0.0387226
ENSG00000276702	AC010809.3	15	-	33850538	33851178	novel transcript, antisense to RYR3	lncRNA	3.15539	0.0491243
ENSG00000139890	REM2	14	+	22883222	22887678	RRAD and GEM like GTPase 2 [Source:HGNC Symbol;Acc:HGNC:20248]	protein_coding	3.1434	0.0478648
ENSG00000227906	SNAP25-AS1	20	-	10006381	10368776	SNAP25 antisense RNA 1 [Source:HGNC Symbol;Acc:HGNC:44312]	lncRNA	3.11007	0.0239799
ENSG00000183798	EMILIN3	20	-	41359962	41366818	elastin microfibril interfacer 3 [Source:HGNC Symbol;Acc:HGNC:16123]	protein_coding	3.09203	0.0106483
ENSG00000258472	AC005726.1	17	-	28455752	28614185	novel protein	protein_coding	3.07709	0.0119241
ENSG00000144410	CPO	2	+	206939518	206969474	carboxypeptidase O [Source:HGNC Symbol;Acc:HGNC:21011]	protein_coding	3.06266	0.0416996
ENSG00000243107	AC000120.2	7	-	92200014	92206857	novel transcript	lncRNA	3.05527	0.0470127
ENSG00000287737	AC132872.5	17	+	82273748	82279645	novel transcript	lncRNA	3.02682	0.0486087
ENSG00000164736	SOX17	8	+	54457935	54460892	SRY-box transcription factor 17 [Source:HGNC Symbol;Acc:HGNC:18122]	protein_coding	2.98593	0.00146871
ENSG00000265222	AC079336.2	17	-	32509954	32523424	novel transcript, sense intronic MYO1D	lncRNA	2.93001	0.0430362
ENSG00000179967	PPP1R14BP3	4	-	139114930	139115374	protein phosphatase 1 regulatory inhibitor subunit 14B pseudogene 3 [Source:HGNC Symbol;Acc:HGNC:16330]	processed_pseudogene	2.89826	0.0459392
ENSG00000274211	SOCS7	17	+	38351844	38405593	suppressor of cytokine signaling 7 [Source:HGNC Symbol;Acc:HGNC:29846]	protein_coding	2.89089	0.040027
ENSG00000142319	SLC6A3	5	-	1392794	1445440	solute carrier family 6 member 3 [Source:HGNC Symbol;Acc:HGNC:11049]	protein_coding	2.88327	0.0468084
ENSG00000273017	AP000240.1	21	+	29359002	29359453	novel transcript, sense intronic BACH1	lncRNA	2.86632	0.0423626
ENSG00000233705	SLC26A4-AS1	7	-	107650260	107662204	SLC26A4 antisense RNA 1 [Source:HGNC Symbol;Acc:HGNC:22385]	lncRNA	2.79045	0.0151038
ENSG00000172554	SNTG2	2	+	950849	1367613	syntrophin gamma 2 [Source:HGNC Symbol;Acc:HGNC:13741]	protein_coding	2.76195	0.0463734
ENSG00000242142	SERBP1P3	3	-	53064283	53065091	SERPINE1 mRNA binding protein 1 pseudogene 3 [Source:HGNC Symbol;Acc:HGNC:44630]	processed_pseudogene	2.74945	0.04995
ENSG00000148488	ST8SIA6	10	-	17315421	17454595	ST8 alpha-N-acetyl-neuraminide alpha-2,8-sialyltransferase 6 [Source:HGNC Symbol;Acc:HGNC:23317]	protein_coding	2.72237	0.0370633
ENSG00000287900	AC061961.1	2	-	154688296	154697817	novel transcript	lncRNA	2.67376	0.0440565
ENSG00000278224	PRICKLE4	6	+	41780782	41787452	prickle planar cell polarity protein 4 [Source:HGNC Symbol;Acc:HGNC:16805]	protein_coding	2.56807	0.0418502
ENSG00000157734	SNX22	15	+	64151715	64157481	sorting nexin 22 [Source:HGNC Symbol;Acc:HGNC:16315]	protein_coding	2.54297	0.033488
ENSG00000104643	MTMR9	8	+	11284816	11328146	myotubularin related protein 9 [Source:HGNC Symbol;Acc:HGNC:14596]	protein_coding	2.45733	0.0300193
ENSG00000115648	MLPH	2	+	237485428	237555322	melanophilin [Source:HGNC Symbol;Acc:HGNC:29643]	protein_coding	2.38418	0.0175849
ENSG00000225746	MEG8	14	+	100894770	101038859	maternally expressed 8, small nucleolar RNA host gene [Source:HGNC Symbol;Acc:HGNC:14574]	lncRNA	2.33957	0.0178212
ENSG00000265107	GJA5	1	-	147756199	147773362	gap junction protein alpha 5 [Source:HGNC Symbol;Acc:HGNC:4279]	protein_coding	2.28468	0.000347987
ENSG00000111404	RERGL	12	-	18080869	18320107	RERG like [Source:HGNC Symbol;Acc:HGNC:26213]	protein_coding	2.28151	0.0327718
ENSG00000223403	MEG9	14	+	101068283	101072937	maternally expressed 9 [Source:HGNC Symbol;Acc:HGNC:43874]	lncRNA	2.16277	0.023365
ENSG00000174640	SLCO2A1	3	-	133932701	134052184	solute carrier organic anion transporter family member 2A1 [Source:HGNC Symbol;Acc:HGNC:10955]	protein_coding	2.05216	0.00251942
ENSG00000168309	FAM107A	3	-	58564117	58627610	family with sequence similarity 107 member A [Source:HGNC Symbol;Acc:HGNC:30827]	protein_coding	2.04187	0.000375277
ENSG00000099864	PALM	19	+	708935	748329	paralemmin [Source:HGNC Symbol;Acc:HGNC:8594]	protein_coding	0.48629	0.0495219
ENSG00000106123	EPHB6	7	+	142855061	142871094	EPH receptor B6 [Source:HGNC Symbol;Acc:HGNC:3396]	protein_coding	0.484479	0.00139828
ENSG00000143416	SELENBP1	1	-	151364304	151372707	selenium binding protein 1 [Source:HGNC Symbol;Acc:HGNC:10719]	protein_coding	0.479465	0.00601782
ENSG00000182224	CYB5D1	17	+	7857746	7862282	cytochrome b5 domain containing 1 [Source:HGNC Symbol;Acc:HGNC:26516]	protein_coding	0.475678	0.0196317
ENSG00000143061	IGSF3	1	-	116574399	116667755	immunoglobulin superfamily member 3 [Source:HGNC Symbol;Acc:HGNC:5950]	protein_coding	0.468807	0.0203063
ENSG00000154134	ROBO3	11	+	124865432	124881471	roundabout guidance receptor 3 [Source:HGNC Symbol;Acc:HGNC:13433]	protein_coding	0.454624	0.0204964
ENSG00000171388	APLN	X	-	129645259	129654956	apelin [Source:HGNC Symbol;Acc:HGNC:16665]	protein_coding	0.453958	0.0488579
								0.441113	0.0335175
ENSG00000133134	BEX2	X	-	103309346	103311007	brain expressed X-linked 2 [Source:HGNC Symbol;Acc:HGNC:30933]	protein_coding	0.439967	0.047213
ENSG00000173369	C1QB	1	+	22652762	22661637	complement C1q B chain [Source:HGNC Symbol;Acc:HGNC:1242]	protein_coding	0.43651	0.0106208
ENSG00000164326	CARTPT	5	+	71719275	71721048	CART prepropeptide [Source:HGNC Symbol;Acc:HGNC:24323]	protein_coding	0.430213	0.0370575
ENSG00000106538	RARRES2	7	-	150338317	150341662	retinoic acid receptor responder 2 [Source:HGNC Symbol;Acc:HGNC:9868]	protein_coding	0.426058	0.00452711
ENSG00000189367	KIAA0408	6	-	127438406	127459389	KIAA0408 [Source:HGNC Symbol;Acc:HGNC:21636]	protein_coding	0.426016	0.0350638
ENSG00000123689	G0S2	1	+	209675412	209676390	G0/G1 switch 2 [Source:HGNC Symbol;Acc:HGNC:30229]	protein_coding	0.42459	0.0342976
ENSG00000196549	MME	3	+	155024124	155183704	membrane metalloendopeptidase [Source:HGNC Symbol;Acc:HGNC:7154]	protein_coding	0.423703	0.0296183
ENSG00000140968	IRF8	16	+	85899162	85922606	interferon regulatory factor 8 [Source:HGNC Symbol;Acc:HGNC:5358]	protein_coding	0.414924	0.0449784
ENSG00000255154	HTD2	3	+	58306245	58320193	hydroxyacyl-thioester dehydratase type 2 [Source:HGNC Symbol;Acc:HGNC:53111]	protein_coding	0.407024	0.0375868
ENSG00000135917	SLC19A3	2	-	227683763	227718028	solute carrier family 19 member 3 [Source:HGNC Symbol;Acc:HGNC:16266]	protein_coding	0.405184	0.0210724
ENSG00000219545	UMAD1	7	+	7640711	7968020	UBAP1-MVB12-associated (UMA) domain containing 1 [Source:HGNC Symbol;Acc:HGNC:48955]	protein_coding	0.405025	0.0469101
ENSG00000197766	CFD	19	+	859664	863641	complement factor D [Source:HGNC Symbol;Acc:HGNC:2771]	protein_coding	0.40425	0.0053564
ENSG00000184731	FAM110C	2	-	38814	46870	family with sequence similarity 110 member C [Source:HGNC Symbol;Acc:HGNC:33340]	protein_coding	0.402375	0.0278272
ENSG00000255769	GOLGA2P10	15	-	82472993	82513950	GOLGA2 pseudogene 10 [Source:HGNC Symbol;Acc:HGNC:26229]	transcribed_unprocessed_pseudogene	0.400801	0.049466
ENSG00000173372	C1QA	1	+	22636628	22639678	complement C1q A chain [Source:HGNC Symbol;Acc:HGNC:1241]	protein_coding	0.400259	0.00142606
ENSG00000124171	PARD6B	20	+	50731580	50756795	par-6 family cell polarity regulator beta [Source:HGNC Symbol;Acc:HGNC:16245]	protein_coding	0.380134	0.0256787
ENSG00000116183	PAPPA2	1	+	176463171	176845601	pappalysin 2 [Source:HGNC Symbol;Acc:HGNC:14615]	protein_coding	0.376697	0.0184107
ENSG00000141668	CBLN2	18	-	72536680	72638521	cerebellin 2 precursor [Source:HGNC Symbol;Acc:HGNC:1544]	protein_coding	0.375458	0.0403725
ENSG00000105609	LILRB5	19	-	54249421	54257301	leukocyte immunoglobulin like receptor B5 [Source:HGNC Symbol;Acc:HGNC:6609]	protein_coding	0.372318	0.0354807
ENSG00000128965	CHAC1	15	+	40952962	40956512	ChaC glutathione specific gamma-glutamylcyclotransferase 1 [Source:HGNC Symbol;Acc:HGNC:28680]	protein_coding	0.371779	0.0127746
ENSG00000170421	KRT8	12	-	52897187	52949954	keratin 8 [Source:HGNC Symbol;Acc:HGNC:6446]	protein_coding	0.37083	0.00260455
ENSG00000138615	CILP	15	-	65194760	65211473	cartilage intermediate layer protein [Source:HGNC Symbol;Acc:HGNC:1980]	protein_coding	0.370418	0.023159
ENSG00000159189	C1QC	1	+	22643633	22648110	complement C1q C chain [Source:HGNC Symbol;Acc:HGNC:1245]	protein_coding	0.365017	0.00225419
ENSG00000154736	ADAMTS5	21	-	26917922	26967088	ADAM metallopeptidase with thrombospondin type 1 motif 5 [Source:HGNC Symbol;Acc:HGNC:221]	protein_coding	0.36106	0.0495963
ENSG00000096696	DSP	6	+	7541617	7586714	desmoplakin [Source:HGNC Symbol;Acc:HGNC:3052]	protein_coding	0.360733	0.0428694
ENSG00000161929	SCIMP	17	-	5208920	5234860	SLP adaptor and CSK interacting membrane protein [Source:HGNC Symbol;Acc:HGNC:33504]	protein_coding	0.354917	0.0327645
ENSG00000133317	LGALS12	11	+	63506052	63516774	galectin 12 [Source:HGNC Symbol;Acc:HGNC:15788]	protein_coding	0.352864	0.0399651
ENSG00000224596	ZMIZ1-AS1	10	-	78943328	79067895	ZMIZ1 antisense RNA 1 [Source:HGNC Symbol;Acc:HGNC:27433]	lncRNA	0.351362	0.0484435
ENSG00000272523	LINC01023	5	-	108727825	108728260	long intergenic non-protein coding RNA 1023 [Source:HGNC Symbol;Acc:HGNC:49004]	lncRNA	0.346559	0.0489002
ENSG00000160180	TFF3	21	-	42311667	42315651	trefoil factor 3 [Source:HGNC Symbol;Acc:HGNC:11757]	protein_coding	0.346045	0.0382626
ENSG00000120949	TNFRSF8	1	+	12063303	12144207	TNF receptor superfamily member 8 [Source:HGNC Symbol;Acc:HGNC:11923]	protein_coding	0.344239	0.042378
ENSG00000152580	IGSF10	3	-	151425384	151458709	immunoglobulin superfamily member 10 [Source:HGNC Symbol;Acc:HGNC:26384]	protein_coding	0.342585	0.0288179
ENSG00000142408	CACNG8	19	+	53963040	53990215	calcium voltage-gated channel auxiliary subunit gamma 8 [Source:HGNC Symbol;Acc:HGNC:13628]	protein_coding	0.341449	0.0410977
ENSG00000171864	PRND	20	+	4721909	4728460	prion like protein doppel [Source:HGNC Symbol;Acc:HGNC:15748]	protein_coding	0.341281	0.0477378
ENSG00000161649	CD300LG	17	+	43847148	43863639	CD300 molecule like family member g [Source:HGNC Symbol;Acc:HGNC:30455]	protein_coding	0.340867	0.0111818
ENSG00000018280	SLC11A1	2	+	218382029	218396894	solute carrier family 11 member 1 [Source:HGNC Symbol;Acc:HGNC:10907]	protein_coding	0.339699	0.0313248
ENSG00000017427	IGF1	12	-	102395874	102481744	insulin like growth factor 1 [Source:HGNC Symbol;Acc:HGNC:5464]	protein_coding	0.333631	0.00556768
ENSG00000171408	PDE7B	6	+	135851701	136195574	phosphodiesterase 7B [Source:HGNC Symbol;Acc:HGNC:8792]	protein_coding	0.333479	0.0190367
ENSG00000170476	MZB1	5	-	139387467	139390081	marginal zone B and B1 cell specific protein [Source:HGNC Symbol;Acc:HGNC:30125]	protein_coding	0.332428	0.0366698
ENSG00000137857	DUOX1	15	+	45129933	45165576	dual oxidase 1 [Source:HGNC Symbol;Acc:HGNC:3062]	protein_coding	0.3258	0.0188405
ENSG00000196917	HCAR1	12	-	122726076	122730844	hydroxycarboxylic acid receptor 1 [Source:HGNC Symbol;Acc:HGNC:4532]	protein_coding	0.320444	0.0278744
ENSG00000204421	LY6G6C	6	-	31718648	31721746	lymphocyte antigen 6 family member G6C [Source:HGNC Symbol;Acc:HGNC:13936]	protein_coding	0.320224	0.0494541
ENSG00000177675	CD163L1	12	-	7346685	7479897	CD163 molecule like 1 [Source:HGNC Symbol;Acc:HGNC:30375]	protein_coding	0.319862	0.0243117
ENSG00000079215	SLC1A3	5	+	36606355	36688334	solute carrier family 1 member 3 [Source:HGNC Symbol;Acc:HGNC:10941]	protein_coding	0.319569	0.0423252
ENSG00000130962	PRRG1	X	+	37349309	37457292	proline rich and Gla domain 1 [Source:HGNC Symbol;Acc:HGNC:9469]	protein_coding	0.316836	0.0218003
ENSG00000152207	CYSLTR2	13	+	48653711	48711226	cysteinyl leukotriene receptor 2 [Source:HGNC Symbol;Acc:HGNC:18274]	protein_coding	0.31577	0.0246407
ENSG00000181126	HLA-V	6	+	29790954	29797811	major histocompatibility complex, class I, V (pseudogene) [Source:HGNC Symbol;Acc:HGNC:23482]	transcribed_unprocessed_pseudogene	0.312292	0.0453339
ENSG00000260941	LINC00622	1	-	119597702	119599271	long intergenic non-protein coding RNA 622 [Source:HGNC Symbol;Acc:HGNC:44251]	lncRNA	0.312264	0.0268387
ENSG00000089505	CMTM1	16	+	66566393	66579137	CKLF like MARVEL transmembrane domain containing 1 [Source:HGNC Symbol;Acc:HGNC:19172]	protein_coding	0.308462	0.0464567
ENSG00000261360	AC010491.1	5	-	14661808	14664604	novel transcript, antisense to FAM105B	lncRNA	0.308404	0.0401166
ENSG00000163827	LRRC2	3	-	46515385	46580099	leucine rich repeat containing 2 [Source:HGNC Symbol;Acc:HGNC:14676]	protein_coding	0.308226	0.0200773
ENSG00000165178	NCF1C	7	-	75156639	75172044	neutrophil cytosolic factor 1C pseudogene [Source:HGNC Symbol;Acc:HGNC:32523]	unprocessed_pseudogene	0.307322	0.0359901
ENSG00000256013	AC027277.1	16	+	10529440	10532082	novel transcript, antisense to EMP2	lncRNA	0.307046	0.0433666
ENSG00000226622	AC092155.1	2	-	62533681	62662829	novel transcript	lncRNA	0.306166	0.0373231
ENSG00000061656	SPAG4	20	+	35615829	35621094	sperm associated antigen 4 [Source:HGNC Symbol;Acc:HGNC:11214]	protein_coding	0.304314	0.0239747
ENSG00000115363	EVA1A	2	-	75469302	75569722	eva-1 homolog A, regulator of programmed cell death [Source:HGNC Symbol;Acc:HGNC:25816]	protein_coding	0.302293	0.0324337
ENSG00000130822	PNCK	X	-	153669733	153689010	pregnancy up-regulated nonubiquitous CaM kinase [Source:HGNC Symbol;Acc:HGNC:13415]	protein_coding	0.301499	0.0440467
ENSG00000160188	RSPH1	21	-	42472486	42496246	radial spoke head component 1 [Source:HGNC Symbol;Acc:HGNC:12371]	protein_coding	0.301396	0.0462093
ENSG00000138207	RBP4	10	-	93591687	93601744	retinol binding protein 4 [Source:HGNC Symbol;Acc:HGNC:9922]	protein_coding	0.29888	0.000181897
ENSG00000186704	DTX2P1	7	+	76978617	77004308	DTX2 pseudogene 1 [Source:HGNC Symbol;Acc:HGNC:42352]	transcribed_unprocessed_pseudogene	0.295038	0.036078
ENSG00000177463	NR2C2	3	+	14947584	15053600	nuclear receptor subfamily 2 group C member 2 [Source:HGNC Symbol;Acc:HGNC:7972]	protein_coding	0.293589	0.0473578
ENSG00000205913	SRRM2-AS1	16	-	2737076	2752600	SRRM2 antisense RNA 1 [Source:HGNC Symbol;Acc:HGNC:44162]	lncRNA	0.292687	0.019948
ENSG00000264187	AC055811.2	17	-	17202649	17237185	novel protein	protein_coding	0.28812	0.0200142
ENSG00000239704	CDRT4	17	-	15436015	15503608	CMT1A duplicated region transcript 4 [Source:HGNC Symbol;Acc:HGNC:14383]	protein_coding	0.28627	0.00089462
ENSG00000175084	DES	2	+	219418377	219426734	desmin [Source:HGNC Symbol;Acc:HGNC:2770]	protein_coding	0.284441	0.000195852
ENSG00000162620	LRRIQ3	1	-	74026015	74198187	leucine rich repeats and IQ motif containing 3 [Source:HGNC Symbol;Acc:HGNC:28318]	protein_coding	0.283355	0.0294563
ENSG00000116990	MYCL	1	-	39895426	39902256	MYCL proto-oncogene, bHLH transcription factor [Source:HGNC Symbol;Acc:HGNC:7555]	protein_coding	0.282412	0.042149
ENSG00000285679	AC079142.1	X	+	7928443	8374386	novel transcript	lncRNA	0.278631	0.0403
ENSG00000187796	CARD9	9	-	136361903	136373681	caspase recruitment domain family member 9 [Source:HGNC Symbol;Acc:HGNC:16391]	protein_coding	0.275552	0.0062094
ENSG00000261663	AC009065.8	16	+	2240487	2241818	novel transcript, antisense to DCI	lncRNA	0.275318	0.0411464
ENSG00000166924	NYAP1	7	+	100483927	100494802	neuronal tyrosine phosphorylated phosphoinositide-3-kinase adaptor 1 [Source:HGNC Symbol;Acc:HGNC:22009]	protein_coding	0.270086	0.0180536
ENSG00000135480	KRT7	12	+	52232520	52252186	keratin 7 [Source:HGNC Symbol;Acc:HGNC:6445]	protein_coding	0.269795	0.00321181
ENSG00000132465	JCHAIN	4	-	70655541	70681817	joining chain of multimeric IgA and IgM [Source:HGNC Symbol;Acc:HGNC:5713]	protein_coding	0.26813	0.008772
ENSG00000126264	HCST	19	+	35902529	35904377	hematopoietic cell signal transducer [Source:HGNC Symbol;Acc:HGNC:16977]	protein_coding	0.267991	0.0314112
ENSG00000181234	TMEM132C	12	+	128267403	128707915	transmembrane protein 132C [Source:HGNC Symbol;Acc:HGNC:25436]	protein_coding	0.26688	0.00345768
ENSG00000125966	MMP24	20	+	35226690	35276998	matrix metallopeptidase 24 [Source:HGNC Symbol;Acc:HGNC:7172]	protein_coding	0.264368	0.0218631
ENSG00000274248	AJ011932.1	21	+	45974489	45974953	novel transcript	lncRNA	0.264114	0.0451344
ENSG00000162493	PDPN	1	+	13583465	13617957	podoplanin [Source:HGNC Symbol;Acc:HGNC:29602]	protein_coding	0.263846	0.0334097
ENSG00000178814	OPLAH	8	-	144051266	144063965	5-oxoprolinase, ATP-hydrolysing [Source:HGNC Symbol;Acc:HGNC:8149]	protein_coding	0.263052	0.0221582
ENSG00000109819	PPARGC1A	4	-	23755041	23904089	PPARG coactivator 1 alpha [Source:HGNC Symbol;Acc:HGNC:9237]	protein_coding	0.261712	0.0221053
ENSG00000197582	GPX1P1	X	-	13378735	13379340	glutathione peroxidase pseudogene 1 [Source:HGNC Symbol;Acc:HGNC:4560]	processed_pseudogene	0.260041	0.0325626
ENSG00000259112	NDUFC2-KCTD14	11	-	78016971	78079865	NDUFC2-KCTD14 readthrough [Source:HGNC Symbol;Acc:HGNC:42956]	protein_coding	0.258753	0.00481595
ENSG00000091831	ESR1	6	+	151656691	152129619	estrogen receptor 1 [Source:HGNC Symbol;Acc:HGNC:3467]	protein_coding	0.25858	0.0402444
ENSG00000010310	GIPR	19	+	45668221	45683722	gastric inhibitory polypeptide receptor [Source:HGNC Symbol;Acc:HGNC:4271]	protein_coding	0.258145	0.0315033
ENSG00000164520	RAET1E	6	-	149883375	149898102	retinoic acid early transcript 1E [Source:HGNC Symbol;Acc:HGNC:16793]	protein_coding	0.256101	0.0454242
ENSG00000156966	B3GNT7	2	+	231395710	231401164	UDP-GlcNAc:betaGal beta-1,3-N-acetylglucosaminyltransferase 7 [Source:HGNC Symbol;Acc:HGNC:18811]	protein_coding	0.255215	0.0499417
ENSG00000168004	PLAAT5	11	-	63461404	63491194	phospholipase A and acyltransferase 5 [Source:HGNC Symbol;Acc:HGNC:24978]	protein_coding	0.25402	0.00332417
ENSG00000235563	AL445183.2	1	+	53114576	53118609	novel transcript	lncRNA	0.253355	0.0387859
ENSG00000140600	SH3GL3	15	+	83447228	83618743	SH3 domain containing GRB2 like 3, endophilin A3 [Source:HGNC Symbol;Acc:HGNC:10832]	protein_coding	0.251989	0.0305074
ENSG00000286077	AL158141.1	X	-	70037840	70039325	novel transcript, antisense to EDA	lncRNA	0.249119	0.0133536
ENSG00000141665	FBXO15	18	-	74073353	74147843	F-box protein 15 [Source:HGNC Symbol;Acc:HGNC:13617]	protein_coding	0.248908	0.0369696
ENSG00000105131	EPHX3	19	-	15226919	15233435	epoxide hydrolase 3 [Source:HGNC Symbol;Acc:HGNC:23760]	protein_coding	0.247198	0.0116093
ENSG00000157303	SUSD3	9	+	93058688	93085133	sushi domain containing 3 [Source:HGNC Symbol;Acc:HGNC:28391]	protein_coding	0.245724	0.00473833
ENSG00000105383	CD33	19	+	51225064	51243860	CD33 molecule [Source:HGNC Symbol;Acc:HGNC:1659]	protein_coding	0.245356	0.0404528
ENSG00000259495	AC016705.2	15	-	80344853	80404214	novel transcript	lncRNA	0.243979	0.0440298
ENSG00000009950	MLXIPL	7	-	73593194	73624543	MLX interacting protein like [Source:HGNC Symbol;Acc:HGNC:12744]	protein_coding	0.243784	0.00182696
ENSG00000214456	PLIN5	19	-	4522531	4535224	perilipin 5 [Source:HGNC Symbol;Acc:HGNC:33196]	protein_coding	0.243024	0.0141186
ENSG00000234807	LINC01135	1	+	58785128	58901109	long intergenic non-protein coding RNA 1135 [Source:HGNC Symbol;Acc:HGNC:49450]	lncRNA	0.242756	0.00931491
ENSG00000243896	OR2A7	7	-	144257663	144264792	olfactory receptor family 2 subfamily A member 7 [Source:HGNC Symbol;Acc:HGNC:8234]	protein_coding	0.242133	0.0310411
ENSG00000204967	PCDHA4	5	+	140806929	141012347	protocadherin alpha 4 [Source:HGNC Symbol;Acc:HGNC:8670]	protein_coding	0.241385	0.0123312
ENSG00000197191	CYSRT1	9	+	137224635	137226315	cysteine rich tail 1 [Source:HGNC Symbol;Acc:HGNC:30529]	protein_coding	0.241124	0.0217263
ENSG00000157445	CACNA2D3	3	+	54122547	55074557	calcium voltage-gated channel auxiliary subunit alpha2delta 3 [Source:HGNC Symbol;Acc:HGNC:15460]	protein_coding	0.23721	0.0314004
ENSG00000164532	TBX20	7	-	35202430	35254100	T-box transcription factor 20 [Source:HGNC Symbol;Acc:HGNC:11598]	protein_coding	0.235163	0.0188989
ENSG00000280734	LINC01232	13	-	99486962	99499306	long intergenic non-protein coding RNA 1232 [Source:HGNC Symbol;Acc:HGNC:49755]	lncRNA	0.232575	0.00490995
ENSG00000177459	ERICH5	8	+	98064522	98093610	glutamate rich 5 [Source:HGNC Symbol;Acc:HGNC:26823]	protein_coding	0.228398	0.0133226
ENSG00000173898	SPTBN2	11	-	66682497	66729226	spectrin beta, non-erythrocytic 2 [Source:HGNC Symbol;Acc:HGNC:11276]	protein_coding	0.227677	0.00483675
ENSG00000265590	CFAP298-TCP10L	21	-	32402511	32612865	CFAP298-TCP10L readthrough [Source:HGNC Symbol;Acc:HGNC:54636]	protein_coding	0.227388	9.55318e-09
ENSG00000255867	DENND5B-AS1	12	+	31589923	31615666	DENND5B antisense RNA 1 [Source:HGNC Symbol;Acc:HGNC:42517]	lncRNA	0.223345	0.0295667
ENSG00000260805	AC092803.1	1	-	212557833	212559731	novel transcript	lncRNA	0.222099	0.0127002
ENSG00000270800	RPS10-NUDT3	6	-	34284887	34426071	RPS10-NUDT3 readthrough [Source:HGNC Symbol;Acc:HGNC:49181]	protein_coding	0.218401	2.70974e-06
ENSG00000273416	AL732292.2	1	-	235104180	235104609	novel transcript	lncRNA	0.215274	0.040233
ENSG00000254709	IGLL5	22	+	22887780	22896111	immunoglobulin lambda like polypeptide 5 [Source:HGNC Symbol;Acc:HGNC:38476]	protein_coding	0.215273	0.00740774
ENSG00000169271	HSPB3	5	+	54455699	54456377	heat shock protein family B (small) member 3 [Source:HGNC Symbol;Acc:HGNC:5248]	protein_coding	0.213121	0.010476
ENSG00000173376	NDNF	4	-	121035613	121073021	neuron derived neurotrophic factor [Source:HGNC Symbol;Acc:HGNC:26256]	protein_coding	0.206585	0.00761702
ENSG00000277957	SENP3-EIF4A1	17	+	7563287	7578715	SENP3-EIF4A1 readthrough (NMD candidate) [Source:HGNC Symbol;Acc:HGNC:49182]	protein_coding	0.205523	9.09608e-05
ENSG00000159239	AC005041.1	2	-	74393836	74421662	novel protein	protein_coding	0.204533	0.0187205
ENSG00000231234	SKP1P1	7	-	66423405	66423893	S-phase kinase associated protein 1 pseudogene 1 [Source:HGNC Symbol;Acc:HGNC:33696]	transcribed_processed_pseudogene	0.203573	0.0443855
ENSG00000258465	AL139011.2	1	-	160216800	160285130	novel protein	protein_coding	0.201883	0.0315047
ENSG00000254473	AL354920.1	9	+	83707594	83713378	novel transcript, antisense to UBQLN1	lncRNA	0.201317	0.0101888
ENSG00000243675	AC080013.2	3	+	158763431	158763753	ribosomal protein L35a (RPL35A) pseudogene	processed_pseudogene	0.20034	0.0345767
ENSG00000275871	AC131025.2	5	-	149425771	149428289	novel transcript	lncRNA	0.199828	0.00376891
ENSG00000173083	HPSE	4	-	83292461	83335153	heparanase [Source:HGNC Symbol;Acc:HGNC:5164]	protein_coding	0.19873	0.0196839
ENSG00000258881	AC007040.2	2	-	70939318	70995336	novel protein	protein_coding	0.197351	0.00846031
ENSG00000180921	FAM83H	8	-	143723933	143738234	family with sequence similarity 83 member H [Source:HGNC Symbol;Acc:HGNC:24797]	protein_coding	0.193812	0.0260803
ENSG00000125848	FLRT3	20	-	14322985	14337614	fibronectin leucine rich transmembrane protein 3 [Source:HGNC Symbol;Acc:HGNC:3762]	protein_coding	0.193069	0.0153269
ENSG00000111057	KRT18	12	+	52948871	52952906	keratin 18 [Source:HGNC Symbol;Acc:HGNC:6430]	protein_coding	0.191212	0.000955945
ENSG00000095203	EPB41L4B	9	-	109171975	109320964	erythrocyte membrane protein band 4.1 like 4B [Source:HGNC Symbol;Acc:HGNC:19818]	protein_coding	0.189936	0.00425098
ENSG00000110887	DAO	12	+	108858932	108901043	D-amino acid oxidase [Source:HGNC Symbol;Acc:HGNC:2671]	protein_coding	0.188141	0.00528239
ENSG00000146521	LINC01558	6	-	167784537	167796872	long intergenic non-protein coding RNA 1558 [Source:HGNC Symbol;Acc:HGNC:21235]	lncRNA	0.187899	0.0026312
ENSG00000244457	ENO1P1	1	+	236483165	236484468	enolase 1 pseudogene 1 [Source:HGNC Symbol;Acc:HGNC:3352]	transcribed_processed_pseudogene	0.187849	0.0313151
ENSG00000173406	DAB1	1	-	56994778	58546734	DAB adaptor protein 1 [Source:HGNC Symbol;Acc:HGNC:2661]	protein_coding	0.186339	0.00669517
ENSG00000080493	SLC4A4	4	+	71062667	71572087	solute carrier family 4 member 4 [Source:HGNC Symbol;Acc:HGNC:11030]	protein_coding	0.18633	0.0495199
ENSG00000128011	LRFN1	19	-	39306566	39320863	leucine rich repeat and fibronectin type III domain containing 1 [Source:HGNC Symbol;Acc:HGNC:29290]	protein_coding	0.185992	0.00965409
ENSG00000220563	PKMP3	6	-	85659892	85660606	pyruvate kinase M1/2 pseudogene 3 [Source:HGNC Symbol;Acc:HGNC:44245]	transcribed_processed_pseudogene	0.184764	0.0153925
ENSG00000259005	AC005479.1	14	-	74474007	74474864	novel transcript	lncRNA	0.183697	0.0480844
ENSG00000165646	SLC18A2	10	+	117241093	117279430	solute carrier family 18 member A2 [Source:HGNC Symbol;Acc:HGNC:10935]	protein_coding	0.180681	0.00962012
ENSG00000250654	AC023794.3	12	-	54076838	54081903	novel pseudogene	transcribed_unprocessed_pseudogene	0.180355	0.00645704
ENSG00000183671	GPR1	2	-	206175316	206218047	G protein-coupled receptor 1 [Source:HGNC Symbol;Acc:HGNC:4463]	protein_coding	0.179896	0.0141317
ENSG00000170074	FAM153A	5	-	177707981	177783398	family with sequence similarity 153 member A [Source:HGNC Symbol;Acc:HGNC:29940]	protein_coding	0.179638	0.0299698
ENSG00000277077	AL158032.2	13	-	21287634	21287828	POTE ankyrin domain family, member C (POTEC) pseudogene	unprocessed_pseudogene	0.178584	0.047711
ENSG00000251056	ANKRD20A17P	4	-	49502145	49506022	ankyrin repeat domain 20 family member A17, pseudogene [Source:HGNC Symbol;Acc:HGNC:43608]	unprocessed_pseudogene	0.177563	0.043703
ENSG00000127533	F2RL3	19	+	16888999	16892606	F2R like thrombin or trypsin receptor 3 [Source:HGNC Symbol;Acc:HGNC:3540]	protein_coding	0.176495	0.0391383
ENSG00000124253	PCK1	20	+	57561080	57568121	phosphoenolpyruvate carboxykinase 1 [Source:HGNC Symbol;Acc:HGNC:8724]	protein_coding	0.175997	0.000525265
ENSG00000260966	AP001486.2	11	-	103050687	103055799	novel transcript, overlapping to DCUN1D5	lncRNA	0.175643	0.00105357
ENSG00000220515	PGAM1P10	6	+	73055097	73055857	phosphoglycerate mutase 1 pseudogene 10 [Source:HGNC Symbol;Acc:HGNC:42457]	processed_pseudogene	0.174819	0.0391868
ENSG00000233254	RPL21P134	X	+	75384346	75384828	ribosomal protein L21 pseudogene 134 [Source:HGNC Symbol;Acc:HGNC:36006]	processed_pseudogene	0.17165	0.030773
ENSG00000229591	AC006017.1	7	-	152120001	152121717	novel transcript	lncRNA	0.166901	0.023587
ENSG00000100884	CPNE6	14	+	24070837	24078100	copine 6 [Source:HGNC Symbol;Acc:HGNC:2319]	protein_coding	0.164469	0.0462656
ENSG00000185811	IKZF1	7	+	50304068	50405101	IKAROS family zinc finger 1 [Source:HGNC Symbol;Acc:HGNC:13176]	protein_coding	0.163011	6.61253e-06
ENSG00000204475	NCR3	6	-	31588895	31593006	natural cytotoxicity triggering receptor 3 [Source:HGNC Symbol;Acc:HGNC:19077]	protein_coding	0.162703	0.0343738
ENSG00000167644	C19orf33	19	+	38304164	38305006	chromosome 19 open reading frame 33 [Source:HGNC Symbol;Acc:HGNC:16668]	protein_coding	0.162613	0.000320254
ENSG00000155846	PPARGC1B	5	+	149730298	149855022	PPARG coactivator 1 beta [Source:HGNC Symbol;Acc:HGNC:30022]	protein_coding	0.162194	0.0237215
ENSG00000231231	LINC01423	21	-	38323635	38333421	long intergenic non-protein coding RNA 1423 [Source:HGNC Symbol;Acc:HGNC:50732]	lncRNA	0.161245	0.0387404
ENSG00000171101	SIGLEC17P	19	+	51167328	51173524	sialic acid binding Ig like lectin 17, pseudogene [Source:HGNC Symbol;Acc:HGNC:15604]	transcribed_unprocessed_pseudogene	0.16006	0.0354927
ENSG00000225151	GOLGA2P7	15	-	84199311	84230136	GOLGA2 pseudogene 7 [Source:HGNC Symbol;Acc:HGNC:49516]	transcribed_unprocessed_pseudogene	0.158253	0.0169857
ENSG00000259511	UBE2Q2L	15	+	84172493	84188379	ubiquitin conjugating enzyme E2 Q2 like [Source:HGNC Symbol;Acc:HGNC:44656]	transcribed_unprocessed_pseudogene	0.157988	0.0290839
ENSG00000169627	BOLA2B	16	-	30192932	30194306	bolA family member 2B [Source:HGNC Symbol;Acc:HGNC:32479]	protein_coding	0.157491	0.0364527
ENSG00000006555	TTC22	1	-	54779712	54801323	tetratricopeptide repeat domain 22 [Source:HGNC Symbol;Acc:HGNC:26067]	protein_coding	0.154902	0.035714
ENSG00000088882	CPXM1	20	-	2794074	2800627	carboxypeptidase X, M14 family member 1 [Source:HGNC Symbol;Acc:HGNC:15771]	protein_coding	0.154465	0.0481297
ENSG00000281641	SAMD12-AS1	8	+	118620498	118906155	SAMD12 antisense RNA 1 [Source:HGNC Symbol;Acc:HGNC:30937]	lncRNA	0.153129	0.0423712
ENSG00000155974	GRIP1	12	-	66347431	67069162	glutamate receptor interacting protein 1 [Source:HGNC Symbol;Acc:HGNC:18708]	protein_coding	0.153043	0.000725791
ENSG00000160207	HSF2BP	21	-	43529186	43659488	heat shock transcription factor 2 binding protein [Source:HGNC Symbol;Acc:HGNC:5226]	protein_coding	0.151713	0.0305141
ENSG00000261707	AC092134.1	16	-	77741468	77743000	novel transcript, antisense to NUDT7	lncRNA	0.150636	0.0345626
ENSG00000100079	LGALS2	22	-	37570248	37582616	galectin 2 [Source:HGNC Symbol;Acc:HGNC:6562]	protein_coding	0.146974	0.00132872
ENSG00000141738	GRB7	17	+	39737927	39747291	growth factor receptor bound protein 7 [Source:HGNC Symbol;Acc:HGNC:4567]	protein_coding	0.146819	0.00438688
ENSG00000262481	TMEM256-PLSCR3	17	-	7389734	7404097	TMEM256-PLSCR3 readthrough (NMD candidate) [Source:HGNC Symbol;Acc:HGNC:49186]	protein_coding	0.145387	0.0339558
ENSG00000256338	RPL41P2	15	+	28315651	28316059	ribosomal protein L41 pseudogene 2 [Source:HGNC Symbol;Acc:HGNC:10357]	processed_pseudogene	0.141835	0.0306283
ENSG00000129451	KLK10	19	-	51012739	51020175	kallikrein related peptidase 10 [Source:HGNC Symbol;Acc:HGNC:6358]	protein_coding	0.140378	0.0281149
ENSG00000286430	AC020558.6	17	+	17504005	17512266	novel transcript, antisense to PEMT	lncRNA	0.140153	0.0233041
ENSG00000228431	ARL5AP3	1	-	68049360	68049745	ADP ribosylation factor like GTPase 5A pseudogene 3 [Source:HGNC Symbol;Acc:HGNC:43935]	processed_pseudogene	0.139721	0.0247795
ENSG00000241593	AC099542.1	3	-	81246579	81297345	novel transcript	lncRNA	0.138942	0.0428557
ENSG00000272282	LINC02084	3	+	27712910	27714005	long intergenic non-protein coding RNA 2084 [Source:HGNC Symbol;Acc:HGNC:52934]	lncRNA	0.138609	0.0386367
ENSG00000270426	AC099343.2	4	-	184471924	184472609	novel transcript, sense intronic to IRF2	lncRNA	0.138287	0.0227535
ENSG00000163082	SGPP2	2	+	222424543	222562621	sphingosine-1-phosphate phosphatase 2 [Source:HGNC Symbol;Acc:HGNC:19953]	protein_coding	0.138096	0.0488155
ENSG00000251095	AC093866.1	4	+	89410960	89726752	novel transcript	lncRNA	0.135761	0.0317409
ENSG00000122223	CD244	1	-	160830160	160862887	CD244 molecule [Source:HGNC Symbol;Acc:HGNC:18171]	protein_coding	0.135758	0.0321727
ENSG00000265206	AC004687.1	17	-	58330884	58332508	novel transcript, MIR142 host	lncRNA	0.135467	0.00864151
ENSG00000225850	AL355490.1	10	+	97334564	97343203	novel transcript	lncRNA	0.133846	0.0438935
ENSG00000269404	SPIB	19	+	50418938	50431314	Spi-B transcription factor [Source:HGNC Symbol;Acc:HGNC:11242]	protein_coding	0.132969	0.0162398
ENSG00000235605	AL355472.1	1	-	234356704	234357141	ribosomal protein S15 (RPS15) pseudogene	processed_pseudogene	0.130437	0.0253924
ENSG00000213402	PTPRCAP	11	-	67435510	67437682	protein tyrosine phosphatase receptor type C associated protein [Source:HGNC Symbol;Acc:HGNC:9667]	protein_coding	0.130239	0.0279099
ENSG00000227885	AL590652.1	6	-	53739266	53794904	novel transcript	lncRNA	0.130037	0.00144496
ENSG00000171345	KRT19	17	-	41523617	41528308	keratin 19 [Source:HGNC Symbol;Acc:HGNC:6436]	protein_coding	0.13	0.0421971
ENSG00000158428	CATIP	2	+	218356857	218368099	ciliogenesis associated TTC17 interacting protein [Source:HGNC Symbol;Acc:HGNC:25062]	protein_coding	0.128081	0.0318149
ENSG00000205038	PKHD1L1	8	+	109362461	109537207	PKHD1 like 1 [Source:HGNC Symbol;Acc:HGNC:20313]	protein_coding	0.127918	0.0394936
ENSG00000228401	AL590226.1	9	-	136647872	136660421	novel transcript, antisense to EGFL7 (HSPC324)	lncRNA	0.125694	0.0122636
ENSG00000167653	PSCA	8	+	142670308	142682725	prostate stem cell antigen [Source:HGNC Symbol;Acc:HGNC:9500]	protein_coding	0.125093	0.0210448
ENSG00000120907	ADRA1A	8	-	26748150	26867278	adrenoceptor alpha 1A [Source:HGNC Symbol;Acc:HGNC:277]	protein_coding	0.122771	0.00208957
ENSG00000262209	PCDHGB3	5	+	141370242	141512975	protocadherin gamma subfamily B, 3 [Source:HGNC Symbol;Acc:HGNC:8710]	protein_coding	0.122471	0.00222631
ENSG00000276390	AC004241.3	12	-	47699401	47699917	novel transcript, sense intronic to RPAP3	lncRNA	0.122161	0.020993
ENSG00000267264	AC006504.3	19	+	27803538	27804060	vomeronasal receptor pseudogene	processed_pseudogene	0.12195	0.0186947
ENSG00000230870	FBXW11P1	21	-	31627127	31628600	F-box and WD repeat domain containing 11 pseudogene 1 [Source:HGNC Symbol;Acc:HGNC:1145]	processed_pseudogene	0.121618	0.0339383
ENSG00000231473	RB1-DT	13	-	48296162	48303661	RB1 divergent transcript [Source:HGNC Symbol;Acc:HGNC:42778]	lncRNA	0.120042	0.0175309
ENSG00000284060	AC002472.2	22	-	21002895	21009453	pseudogene similar to part of tubulin, alpha 3c (TUBA3C)	transcribed_unprocessed_pseudogene	0.119038	0.0200876
ENSG00000286070	AP000356.5	22	+	24556007	24628987	novel protein	protein_coding	0.11885	0.00310957
ENSG00000255819	KLRC4-KLRK1	12	-	10372353	10410146	KLRC4-KLRK1 readthrough [Source:HGNC Symbol;Acc:HGNC:48357]	protein_coding	0.117721	0.00362485
ENSG00000256564	AC007552.2	12	+	16567411	16573940	novel transcript	lncRNA	0.117205	0.0309792
ENSG00000231494	RPL21P35	2	+	231559903	231560364	ribosomal protein L21 pseudogene 35 [Source:HGNC Symbol;Acc:HGNC:36900]	processed_pseudogene	0.116965	0.0178391
ENSG00000249996	PPIC-AS1	5	+	123036271	123054667	PPIC antisense RNA 1 [Source:HGNC Symbol;Acc:HGNC:40464]	lncRNA	0.11307	0.0279434
ENSG00000225193	RPS12P26	15	+	90206572	90206967	ribosomal protein S12 pseudogene 26 [Source:HGNC Symbol;Acc:HGNC:36320]	transcribed_processed_pseudogene	0.112944	0.0282405
ENSG00000256278	AC048382.1	15	-	84611689	84614969	novel transcript, antisense to ZSCAN2	lncRNA	0.111769	0.0176822
ENSG00000001626	CFTR	7	+	117287120	117715971	CF transmembrane conductance regulator [Source:HGNC Symbol;Acc:HGNC:1884]	protein_coding	0.111689	0.022695
ENSG00000267120	AD000671.2	19	-	35739252	35745432	novel transcript	protein_coding	0.110801	0.00867096
ENSG00000188372	ZP3	7	+	76397518	76442071	zona pellucida glycoprotein 3 [Source:HGNC Symbol;Acc:HGNC:13189]	protein_coding	0.110712	0.0376358
ENSG00000278153	AL121782.1	20	-	13368291	13368703	novel transcript	lncRNA	0.11064	0.0244389
ENSG00000130768	SMPDL3B	1	+	27935000	27959157	sphingomyelin phosphodiesterase acid like 3B [Source:HGNC Symbol;Acc:HGNC:21416]	protein_coding	0.110207	0.00156601
ENSG00000236384	LINC00479	21	-	41711520	41715775	long intergenic non-protein coding RNA 479 [Source:HGNC Symbol;Acc:HGNC:19727]	lncRNA	0.109852	0.0128257
ENSG00000103056	SMPD3	16	-	68358327	68448508	sphingomyelin phosphodiesterase 3 [Source:HGNC Symbol;Acc:HGNC:14240]	protein_coding	0.106455	0.000672343
ENSG00000197632	SERPINB2	18	+	63871692	63903888	serpin family B member 2 [Source:HGNC Symbol;Acc:HGNC:8584]	protein_coding	0.106316	0.0177185
ENSG00000251002	AC244502.1	14	-	22197446	22482959	novel transcript, antisense to IG_gene_cluster	lncRNA	0.105564	0.00851994
ENSG00000132874	SLC14A2	18	+	45212995	45683688	solute carrier family 14 member 2 [Source:HGNC Symbol;Acc:HGNC:10919]	protein_coding	0.105062	0.0205428
ENSG00000259146	AC005476.2	14	-	71292729	71321882	novel transcript, antisense to SIPA1L1	lncRNA	0.103858	0.00949673
ENSG00000176387	HSD11B2	16	+	67430652	67437553	hydroxysteroid 11-beta dehydrogenase 2 [Source:HGNC Symbol;Acc:HGNC:5209]	protein_coding	0.103677	0.0210595
ENSG00000275234	AC010503.5	19	+	6469465	6470152	novel transcript, antisense to DENND1C	lncRNA	0.103061	0.00746671
ENSG00000066813	ACSM2B	16	-	20536226	20576427	acyl-CoA synthetase medium chain family member 2B [Source:HGNC Symbol;Acc:HGNC:30931]	protein_coding	0.102714	0.0175838
ENSG00000267385	AC011498.4	19	-	4528427	4540067	novel protein	protein_coding	0.102513	0.000625023
ENSG00000100453	GZMB	14	-	24630954	24634267	granzyme B [Source:HGNC Symbol;Acc:HGNC:4709]	protein_coding	0.101401	0.0219562
ENSG00000107159	CA9	9	+	35673918	35681159	carbonic anhydrase 9 [Source:HGNC Symbol;Acc:HGNC:1383]	protein_coding	0.0984327	0.00115109
ENSG00000124107	SLPI	20	-	45252239	45254564	secretory leukocyte peptidase inhibitor [Source:HGNC Symbol;Acc:HGNC:11092]	protein_coding	0.0975258	0.00170326
ENSG00000146700	SSC4D	7	-	76389334	76409697	scavenger receptor cysteine rich family member with 4 domains [Source:HGNC Symbol;Acc:HGNC:14461]	protein_coding	0.0973552	9.52633e-05
ENSG00000248256	OCIAD1-AS1	4	-	48852008	48860203	OCIAD1 antisense RNA 1 [Source:HGNC Symbol;Acc:HGNC:40751]	lncRNA	0.097198	0.022342
ENSG00000258790	AL121594.1	14	+	35122549	35317474	novel transcript	protein_coding	0.0969934	0.0295472
ENSG00000267265	AC011476.3	19	+	55006193	55048086	novel transcript, antisense to RDH13 and GP6	lncRNA	0.0963558	0.00423818
ENSG00000025423	HSD17B6	12	+	56752161	56787790	hydroxysteroid 17-beta dehydrogenase 6 [Source:HGNC Symbol;Acc:HGNC:23316]	protein_coding	0.0956197	0.0401881
ENSG00000254506	AP003080.1	11	+	101584295	101595156	novel pseudogene	transcribed_processed_pseudogene	0.0953518	0.0116816
ENSG00000114200	BCHE	3	-	165772904	165837462	butyrylcholinesterase [Source:HGNC Symbol;Acc:HGNC:983]	protein_coding	0.0946562	0.0236734
ENSG00000157211	CDCP2	1	-	54132968	54153770	CUB domain containing protein 2 [Source:HGNC Symbol;Acc:HGNC:27297]	protein_coding	0.0939663	0.0255237
ENSG00000127074	RGS13	1	+	192636138	192660306	regulator of G protein signaling 13 [Source:HGNC Symbol;Acc:HGNC:9995]	protein_coding	0.0933106	0.0153074
ENSG00000233073	GRM3-AS1	7	-	86782357	86803409	GRM3 antisense RNA 1 [Source:HGNC Symbol;Acc:HGNC:40264]	lncRNA	0.0918643	0.00909378
ENSG00000285790	AC021517.2	18	-	45491581	45503824	novel transcript	lncRNA	0.0908677	0.00582948
ENSG00000178750	STX19	3	-	94014365	94028597	syntaxin 19 [Source:HGNC Symbol;Acc:HGNC:19300]	protein_coding	0.0891906	0.00615002
ENSG00000213131	YWHAZP4	6	+	127355756	127356789	tyrosine 3-monooxygenase/tryptophan 5-monooxygenase activation protein zeta pseudogene 4 [Source:HGNC Symbol;Acc:HGNC:30851]	processed_pseudogene	0.0883761	0.0130165
ENSG00000114771	AADAC	3	+	151814073	151828488	arylacetamide deacetylase [Source:HGNC Symbol;Acc:HGNC:17]	protein_coding	0.0877168	0.00195454
ENSG00000170290	SLN	11	-	107707378	107719693	sarcolipin [Source:HGNC Symbol;Acc:HGNC:11089]	protein_coding	0.0873684	0.000163552
ENSG00000163959	SLC51A	3	+	196211487	196243178	solute carrier family 51 subunit alpha [Source:HGNC Symbol;Acc:HGNC:29955]	protein_coding	0.0872493	0.000222777
ENSG00000128510	CPA4	7	+	130293134	130324180	carboxypeptidase A4 [Source:HGNC Symbol;Acc:HGNC:15740]	protein_coding	0.0871654	7.51978e-05
ENSG00000251257	AC010457.1	5	-	38460925	38468339	novel transcript	lncRNA	0.0832703	0.0131873
ENSG00000237289	CKMT1B	15	+	43593054	43604901	creatine kinase, mitochondrial 1B [Source:HGNC Symbol;Acc:HGNC:1995]	protein_coding	0.0805675	0.00243722
ENSG00000166947	EPB42	15	-	43197227	43221018	erythrocyte membrane protein band 4.2 [Source:HGNC Symbol;Acc:HGNC:3381]	protein_coding	0.0778495	0.00808809
ENSG00000130545	CRB3	19	+	6463777	6467221	crumbs cell polarity complex component 3 [Source:HGNC Symbol;Acc:HGNC:20237]	protein_coding	0.0765963	0.000994832
ENSG00000154252	GAL3ST2	2	+	241776822	241804287	galactose-3-O-sulfotransferase 2 [Source:HGNC Symbol;Acc:HGNC:24869]	protein_coding	0.0760051	0.000796127
ENSG00000223802	CERS1	19	-	18868545	18896727	ceramide synthase 1 [Source:HGNC Symbol;Acc:HGNC:14253]	protein_coding	0.0745056	0.0352388
ENSG00000182870	GALNT9	12	-	132196372	132329589	polypeptide N-acetylgalactosaminyltransferase 9 [Source:HGNC Symbol;Acc:HGNC:4131]	protein_coding	0.073144	1.40817e-05
ENSG00000171811	CFAP46	10	-	132808392	132942823	cilia and flagella associated protein 46 [Source:HGNC Symbol;Acc:HGNC:25247]	protein_coding	0.0711738	0.014097
ENSG00000255054	AL020996.2	1	+	25811470	25823744	novel protein	protein_coding	0.0694319	0.00541848
ENSG00000184937	WT1	11	-	32387775	32435564	WT1 transcription factor [Source:HGNC Symbol;Acc:HGNC:12796]	protein_coding	0.0684919	0.0155838
ENSG00000124743	KLHL31	6	-	53647916	53665756	kelch like family member 31 [Source:HGNC Symbol;Acc:HGNC:21353]	protein_coding	0.0646045	5.05558e-06
ENSG00000124920	MYRF	11	+	61752636	61788518	myelin regulatory factor [Source:HGNC Symbol;Acc:HGNC:1181]	protein_coding	0.063357	0.000514139
ENSG00000158301	GPRASP2	X	+	102712176	102717733	G protein-coupled receptor associated sorting protein 2 [Source:HGNC Symbol;Acc:HGNC:25169]	protein_coding	0.0607707	4.39865e-17
ENSG00000100985	MMP9	20	+	46008908	46016561	matrix metallopeptidase 9 [Source:HGNC Symbol;Acc:HGNC:7176]	protein_coding	0.058262	0.0085184
ENSG00000143375	CGN	1	+	151510510	151538692	cingulin [Source:HGNC Symbol;Acc:HGNC:17429]	protein_coding	0.0575199	0.024049
ENSG00000135127	BICDL1	12	+	119989869	120094494	BICD family like cargo adaptor 1 [Source:HGNC Symbol;Acc:HGNC:28095]	protein_coding	0.0574804	0.00813157
ENSG00000230918	DPP4-DT	2	+	162073256	162077911	DPP4 divergent transcript [Source:HGNC Symbol;Acc:HGNC:40191]	lncRNA	0.0569461	0.0365725
ENSG00000230194	AC000081.1	22	-	19238443	19238739	ribosomal protein L34 (RPL34) pseudogene	processed_pseudogene	0.0512528	0.0302566
ENSG00000230397	SPTLC1P1	10	+	31360955	31361215	serine palmitoyltransferase long chain base subunit 1 pseudogene 1 [Source:HGNC Symbol;Acc:HGNC:39668]	transcribed_processed_pseudogene	0.0512528	0.0302566
ENSG00000242728	UQCRHP4	3	+	70140217	70140488	ubiquinol-cytochrome c reductase hinge protein pseudogene 4 [Source:HGNC Symbol;Acc:HGNC:38047]	processed_pseudogene	0.0512528	0.0302566
ENSG00000258531	BANF1P1	14	+	68936602	68936864	BANF1 pseudogene 1 [Source:HGNC Symbol;Acc:HGNC:20252]	processed_pseudogene	0.0512528	0.0302566
ENSG00000270789	AC135983.6	15	-	32461666	32461809	novel pseudogene	processed_pseudogene	0.0502438	0.00140815
ENSG00000234106	SRP14P2	11	+	93535468	93535816	signal recognition particle 14 pseudogene 2 [Source:HGNC Symbol;Acc:HGNC:53768]	processed_pseudogene	0.0497039	0.028878
ENSG00000240509	RPL34P18	8	-	93957338	93957691	ribosomal protein L34 pseudogene 18 [Source:HGNC Symbol;Acc:HGNC:35968]	processed_pseudogene	0.0497039	0.028878
ENSG00000172367	PDZD3	11	+	119185457	119190223	PDZ domain containing 3 [Source:HGNC Symbol;Acc:HGNC:19891]	protein_coding	0.0491063	0.000844298
ENSG00000165591	FAAH2	X	+	57286706	57489196	fatty acid amide hydrolase 2 [Source:HGNC Symbol;Acc:HGNC:26440]	protein_coding	0.04727	0.00603312
ENSG00000147676	MAL2	8	+	119165034	119245673	mal, T cell differentiation protein 2 (gene/pseudogene) [Source:HGNC Symbol;Acc:HGNC:13634]	protein_coding	0.0449581	0.00204386
ENSG00000092295	TGM1	14	-	24249114	24264432	transglutaminase 1 [Source:HGNC Symbol;Acc:HGNC:11777]	protein_coding	0.0447991	0.00501274
ENSG00000227039	ITGB2-AS1	21	+	44921051	44929678	ITGB2 antisense RNA 1 [Source:HGNC Symbol;Acc:HGNC:44304]	lncRNA	0.0447751	8.60779e-08
ENSG00000269220	LINC00528	22	+	17777322	17779481	long intergenic non-protein coding RNA 528 [Source:HGNC Symbol;Acc:HGNC:26875]	lncRNA	0.0443353	0.000352223
ENSG00000225527	AL450384.1	10	-	18531849	18533336	novel transcript	lncRNA	0.0437791	0.0212492
ENSG00000231739	GAPDHP59	2	+	187415552	187415818	glyceraldehyde-3-phosphate dehydrogenase pseudogene 59 [Source:HGNC Symbol;Acc:HGNC:4152]	processed_pseudogene	0.0422906	0.0192211
ENSG00000260325	HSPB9	17	+	42122804	42123352	heat shock protein family B (small) member 9 [Source:HGNC Symbol;Acc:HGNC:30589]	protein_coding	0.0422906	0.0192211
ENSG00000182000	PPIAP73	3	+	149984395	149984797	peptidylprolyl isomerase A pseudogene 73 [Source:HGNC Symbol;Acc:HGNC:53697]	processed_pseudogene	0.0382862	0.0155958
ENSG00000231916	AC006033.1	7	+	38311383	38311808	coiled-coil-helix-coiled-coil-helix domain containing 10 (CHCHD10) pseudogene	processed_pseudogene	0.0369365	0.01356
ENSG00000259986	AC103876.1	15	+	83179182	83439445	novel transcript, antisense to HDGFRP3	lncRNA	0.0369365	0.01356
ENSG00000286508	AC000050.3	22	+	50672714	50674174	novel transcript	lncRNA	0.0369365	0.01356
ENSG00000167757	KLK11	19	-	51022216	51028039	kallikrein related peptidase 11 [Source:HGNC Symbol;Acc:HGNC:6359]	protein_coding	0.0365371	7.83569e-05
ENSG00000256804	AC138466.2	12	-	132126461	132126764	placenta-specific 8 (PLAC8) pseudogene	processed_pseudogene	0.0338572	8.4785e-05
ENSG00000159958	TNFRSF13C	22	-	41922032	41926806	TNF receptor superfamily member 13C [Source:HGNC Symbol;Acc:HGNC:17755]	protein_coding	0.0327701	3.17724e-05
ENSG00000224094	RPS24P8	3	-	45159774	45160175	ribosomal protein S24 pseudogene 8 [Source:HGNC Symbol;Acc:HGNC:37016]	processed_pseudogene	0.0320556	0.00925791
ENSG00000224858	RPL29P11	3	-	37016523	37017014	ribosomal protein L29 pseudogene 11 [Source:HGNC Symbol;Acc:HGNC:36905]	processed_pseudogene	0.0320556	0.00925791
ENSG00000229628	AC073115.1	7	+	45990905	46000898	novel transcript	lncRNA	0.0320556	0.00925791
ENSG00000249092	PPIAP77	5	-	42892319	42892817	peptidylprolyl isomerase A pseudogene 77 [Source:HGNC Symbol;Acc:HGNC:53701]	processed_pseudogene	0.0320556	0.00925791
ENSG00000257264	AC136443.3	16	+	14901499	14902174	microRNA 3179-1	lncRNA	0.0320556	0.00925791
ENSG00000227598	Z94721.1	6	-	166969626	166999065	novel transcript	lncRNA	0.0315794	0.00936488
ENSG00000228877	AL669970.3	9	+	134527182	134545244	novel transcript	lncRNA	0.0315794	0.00936488
ENSG00000237082	COX5BP6	13	-	100623875	100624429	cytochrome c oxidase subunit 5B pseudogene 6 [Source:HGNC Symbol;Acc:HGNC:2275]	processed_pseudogene	0.0315794	0.00936488
ENSG00000109255	NMU	4	-	55595229	55636698	neuromedin U [Source:HGNC Symbol;Acc:HGNC:7859]	protein_coding	0.0307438	0.00843426
ENSG00000197506	SLC28A3	9	-	84275457	84340758	solute carrier family 28 member 3 [Source:HGNC Symbol;Acc:HGNC:16484]	protein_coding	0.0294174	0.00024193
ENSG00000231393	AL357874.2	9	+	35642514	35643517	novel transcript	lncRNA	0.0288762	0.00683092
ENSG00000232699	BDH2P1	6	+	99174744	99175479	3-hydroxybutyrate dehydrogenase 2, pseudogene 1 [Source:HGNC Symbol;Acc:HGNC:21476]	processed_pseudogene	0.0288762	0.00683092
ENSG00000261040	WFDC21P	17	-	60083566	60091885	WAP four-disulfide core domain 21, pseudogene [Source:HGNC Symbol;Acc:HGNC:50357]	transcribed_unitary_pseudogene	0.0288762	0.00683092
ENSG00000220694	AL096711.1	6	+	127435636	127436189	ribosomal protein L17 (RPL17) pseudogene	processed_pseudogene	0.0283719	0.00663947
ENSG00000272043	AC016405.2	8	+	122780760	122781071	novel transcript	lncRNA	0.0283719	0.00663947
ENSG00000243566	UPK3B	7	+	76510428	76516521	uroplakin 3B [Source:HGNC Symbol;Acc:HGNC:21444]	protein_coding	0.0276292	0.00476737
ENSG00000258521	AL157871.2	14	+	100339832	100340554	novel transcript, antisense to WARS	lncRNA	0.0270076	0.00593474
ENSG00000257368	AC063924.1	12	+	45444766	45445438	mesoderm development candidate 2 (MESDC2) pseudogene	processed_pseudogene	0.0263085	0.00520616
ENSG00000272564	AC012511.1	2	+	85904279	85904727	novel transcript	lncRNA	0.0263085	0.00520616
ENSG00000283511	AC137936.2	3	+	58180009	58187495	novel pseudogene	transcribed_unitary_pseudogene	0.0263085	0.00520616
ENSG00000177197	PCNPP5	13	-	48328084	48328564	PEST containing nuclear protein pseudogene 5 [Source:HGNC Symbol;Acc:HGNC:41977]	processed_pseudogene	0.0258093	0.00490609
ENSG00000235290	HLA-W	6	+	29956596	29958570	major histocompatibility complex, class I, W (pseudogene) [Source:HGNC Symbol;Acc:HGNC:23425]	unprocessed_pseudogene	0.0258093	0.00490609
ENSG00000254933	AP000785.1	11	+	76190725	76195071	novel transcript	lncRNA	0.0258093	0.00490609
ENSG00000270755	AL136141.1	9	+	130044713	130045081	novel transcript	lncRNA	0.0254804	0.00494374
ENSG00000287033	AL590101.1	1	-	211376834	211382717	novel transcript	lncRNA	0.0254804	0.00494374
ENSG00000236094	LINC00545	13	+	30880912	30883395	long intergenic non-protein coding RNA 545 [Source:HGNC Symbol;Acc:HGNC:43680]	lncRNA	0.0248271	0.00473602
ENSG00000099960	SLC7A4	22	-	21028718	21032840	solute carrier family 7 member 4 [Source:HGNC Symbol;Acc:HGNC:11062]	protein_coding	0.0245739	0.00598165
ENSG00000232187	FTH1P7	13	-	22696023	22696574	ferritin heavy chain 1 pseudogene 7 [Source:HGNC Symbol;Acc:HGNC:3994]	processed_pseudogene	0.0241846	0.00407173
ENSG00000259502	AL132640.1	14	+	67610986	67613864	protein kinase C, eta (PRKCH) pseudogene	processed_pseudogene	0.0241846	0.00407173
ENSG00000265542	AC015845.2	17	-	57771946	57834749	novel transcript	lncRNA	0.0241846	0.00407173
ENSG00000286613	AC006213.7	19	-	43897211	43898533	novel transcript, sense intronic to ZNF404	lncRNA	0.023705	0.00374327
ENSG00000273855	AC020658.5	15	-	40285468	40285909	novel transcript, sense intronic to PLCB2	lncRNA	0.0231435	0.00379182
ENSG00000234199	LINC01191	2	+	113970719	114007304	long intergenic non-protein coding RNA 1191 [Source:HGNC Symbol;Acc:HGNC:49595]	lncRNA	0.0216002	0.00279251
ENSG00000251488	AC115622.1	4	-	132836772	132981677	novel transcript	lncRNA	0.0216002	0.00279251
ENSG00000204677	FAM153CP	5	+	178006348	178086529	family with sequence similarity 153 member C, pseudogene [Source:HGNC Symbol;Acc:HGNC:33936]	lncRNA	0.0209531	0.00742476
ENSG00000231544	RSL24D1P11	18	+	57838476	57838966	ribosomal L24 domain containing 1 pseudogene 11 [Source:HGNC Symbol;Acc:HGNC:37881]	processed_pseudogene	0.0208621	0.00264434
ENSG00000230787	PSAT1P3	1	-	79054945	79056055	phosphoserine aminotransferase 1 pseudogene 3 [Source:HGNC Symbol;Acc:HGNC:43989]	processed_pseudogene	0.0201051	0.00218727
ENSG00000234772	LINC00412	13	-	27236282	27250711	long intergenic non-protein coding RNA 412 [Source:HGNC Symbol;Acc:HGNC:42745]	lncRNA	0.019858	0.00214496
ENSG00000259762	AC021739.4	15	-	85750336	85752901	novel transcript, antisense to AKAP13	lncRNA	0.019858	0.00214496
ENSG00000277020	AL590096.1	13	-	20564708	20567045	novel transcript, antisense to IFT88	lncRNA	0.019586	0.00238744
ENSG00000254731	AP003059.1	11	+	86703099	86714092	novel transcript	lncRNA	0.0195341	0.00218226
ENSG00000276850	AC245041.2	10	-	47908064	47991877	novel transcript	lncRNA	0.0191695	0.0441259
ENSG00000182585	EPGN	4	+	74308470	74316789	epithelial mitogen [Source:HGNC Symbol;Acc:HGNC:17470]	protein_coding	0.0191137	3.00524e-10
ENSG00000131037	EPS8L1	19	+	55072020	55087923	EPS8 like 1 [Source:HGNC Symbol;Acc:HGNC:21295]	protein_coding	0.0188659	8.72974e-14
ENSG00000276842	AC023510.2	12	-	25103124	25103869	novel transcript, antisense to LRMP	lncRNA	0.018818	0.00174928
ENSG00000224163	AC025594.1	7	-	128912732	128914063	pseudogene similar to part of filamin C, gamma (actin binding protein 280) (FLNC)	unprocessed_pseudogene	0.0183887	0.00168712
ENSG00000261416	AC012645.3	16	-	30183505	30184957	novel transcript, antisense to CORO1A	lncRNA	0.0183887	0.00168712
ENSG00000273199	AP000692.2	21	-	36319792	36320670	novel transcript, antisense to MORC3	lncRNA	0.0183887	0.00168712
ENSG00000203855	HSD3BP4	1	+	119564066	119572067	hydroxy-delta-5-steroid dehydrogenase, 3 beta, pseudogene 4 [Source:HGNC Symbol;Acc:HGNC:5222]	unprocessed_pseudogene	0.0180143	0.000372836
ENSG00000250669	AC112206.4	5	-	67690033	67690437	mitochondrial ribosomal protein L39 (MRPL39) pseudogene	processed_pseudogene	0.017764	0.00191097
ENSG00000232044	SILC1	2	+	5932543	6003510	sciatic injury induced lincRNA upregulator of SOX11 [Source:HGNC Symbol;Acc:HGNC:26403]	lncRNA	0.0174579	0.000318346
ENSG00000224825	RORB-AS1	9	-	74485551	74499127	RORB antisense RNA 1 [Source:HGNC Symbol;Acc:HGNC:49803]	lncRNA	0.0174548	0.0013448
ENSG00000231069	BX842568.3	X	-	36985523	36986093	novel pseudogene	unprocessed_pseudogene	0.0172678	0.0013226
ENSG00000241185	AC005410.1	17	-	11998353	12021508	ribosomal protein L21 pseudogene 122	transcribed_processed_pseudogene	0.0172678	0.0013226
ENSG00000271992	AL354872.1	1	+	70445071	70445536	novel transcript	lncRNA	0.0172678	0.0013226
ENSG00000272247	AC080013.5	3	-	158801257	158801935	novel transcript, antisense to MFSD1	lncRNA	0.0169967	0.00160847
ENSG00000288059	AL445213.2	X	+	81475532	81498083	novel transcript	lncRNA	0.0169967	0.00160847
ENSG00000251000	GGCTP1	5	-	95834424	95835046	GGCT pseudogene 1 [Source:HGNC Symbol;Acc:HGNC:54609]	processed_pseudogene	0.0169949	0.00131553
ENSG00000277186	AC131212.1	12	-	132593031	132593698	novel transcript	lncRNA	0.0164744	0.00109475
ENSG00000277895	AC135279.4	12	-	64451591	64452901	novel transcript, antisense to TBK1	lncRNA	0.0164744	0.00109475
ENSG00000231010	AL121672.1	22	-	46055740	46058160	novel transcript	lncRNA	0.0162877	0.00105848
ENSG00000287146	AC000085.1	22	+	19291969	19328901	novel transcript	lncRNA	0.016102	0.00111242
ENSG00000263393	AC011825.2	18	-	32122400	32124478	novel transcript, antisense to RNF138	lncRNA	0.0159475	0.00134627
ENSG00000232671	ZNF687-AS1	1	-	151279678	151281950	ZNF687 antisense RNA 1 [Source:HGNC Symbol;Acc:HGNC:54048]	lncRNA	0.015606	0.00113347
ENSG00000233916	ZDHHC20P1	6	-	29708125	29708547	zinc finger DHHC-type containing 20 pseudogene 1 [Source:HGNC Symbol;Acc:HGNC:33456]	processed_pseudogene	0.015606	0.00113347
ENSG00000273287	AL008718.2	22	-	45262273	45263585	novel transcript	lncRNA	0.0156056	0.000904415
ENSG00000272384	AC016405.3	8	-	122779971	122780830	novel transcript	lncRNA	0.0150849	0.00091312
ENSG00000242880	AC026341.1	3	+	115147605	115564389	novel transcript	lncRNA	0.0148295	0.000756708
ENSG00000227591	HSD11B1-AS1	1	-	209661364	209724125	HSD11B1 antisense RNA 1 [Source:HGNC Symbol;Acc:HGNC:54053]	lncRNA	0.0143881	0.00069321
ENSG00000286542	AC124242.3	8	+	18104797	18127346	novel transcript	lncRNA	0.0139577	0.00059596
ENSG00000257529	RPL36A-HNRNPH2	X	+	101391011	101412297	RPL36A-HNRNPH2 readthrough [Source:HGNC Symbol;Acc:HGNC:48349]	protein_coding	0.0139571	6.83649e-09
ENSG00000105509	HAS1	19	-	51713112	51723991	hyaluronan synthase 1 [Source:HGNC Symbol;Acc:HGNC:4818]	protein_coding	0.0137924	2.11526e-05
ENSG00000268297	CLEC4GP1	19	+	7787549	7790621	C-type lectin domain family 4 member G pseudogene 1 [Source:HGNC Symbol;Acc:HGNC:33502]	unprocessed_pseudogene	0.0136959	0.00061205
ENSG00000271367	AL034374.1	6	+	53350158	53350705	novel transcript	lncRNA	0.013534	0.00060006
ENSG00000285476	AC139491.7	5	+	176063748	176126959	novel transcript	protein_coding	0.0135338	0.0134604
ENSG00000269403	AC008750.7	19	-	51350373	51368099	novel protein	protein_coding	0.0134993	0.000546675
ENSG00000238078	LINC01352	1	+	220829255	220832429	long intergenic non-protein coding RNA 1352 [Source:HGNC Symbol;Acc:HGNC:50578]	lncRNA	0.0133317	0.000503966
ENSG00000285417	BX571818.1	1	+	206035253	206062257	novel pseudogene	transcribed_unitary_pseudogene	0.0129771	0.000466728
ENSG00000169594	BNC1	15	-	83255903	83284714	basonuclin 1 [Source:HGNC Symbol;Acc:HGNC:1081]	protein_coding	0.0129608	1.30731e-06
ENSG00000226443	GAPDHP32	1	-	119533749	119534746	glyceraldehyde 3 phosphate dehydrogenase pseudogene 32 [Source:HGNC Symbol;Acc:HGNC:37784]	processed_pseudogene	0.0125765	0.000461023
ENSG00000216921	FAM240C	2	-	241893985	241902551	family with sequence similarity 240 member C [Source:HGNC Symbol;Acc:HGNC:54200]	protein_coding	0.0125008	0.000588118
ENSG00000232628	AC092809.2	1	-	224208741	224213625	novel transcript	lncRNA	0.0124118	0.000384313
ENSG00000230131	LINC02641	10	+	123356450	123537767	long intergenic non-protein coding RNA 2641 [Source:HGNC Symbol;Acc:HGNC:54125]	lncRNA	0.0118982	0.000320426
ENSG00000230138	LINC02812	1	-	53366656	53368245	long intergenic non-protein coding RNA 2812 [Source:HGNC Symbol;Acc:HGNC:54344]	lncRNA	0.0117538	0.000328357
ENSG00000235151	AC131097.3	2	+	241844380	241845036	novel transcript	lncRNA	0.0117538	0.000328357
ENSG00000102854	MSLN	16	+	760734	768865	mesothelin [Source:HGNC Symbol;Acc:HGNC:7371]	protein_coding	0.0117245	2.16301e-05
ENSG00000055957	ITIH1	3	+	52777595	52792068	inter-alpha-trypsin inhibitor heavy chain 1 [Source:HGNC Symbol;Acc:HGNC:6166]	protein_coding	0.011429	0.000270081
ENSG00000116690	PRG4	1	+	186296279	186314567	proteoglycan 4 [Source:HGNC Symbol;Acc:HGNC:9364]	protein_coding	0.0107824	0.00942461
ENSG00000182566	CLEC4G	19	-	7728957	7733906	C-type lectin domain family 4 member G [Source:HGNC Symbol;Acc:HGNC:24591]	protein_coding	0.0106941	0.000206978
ENSG00000213412	HNRNPA1P33	10	+	46415853	46416413	heterogeneous nuclear ribonucleoprotein A1 pseudogene 33 [Source:HGNC Symbol;Acc:HGNC:44990]	processed_pseudogene	0.0106249	0.000450935
ENSG00000286403	AC010378.1	5	+	139503242	139511374	novel transcript	lncRNA	0.0101547	0.00016456
ENSG00000179914	ITLN1	1	-	160876540	160885180	intelectin 1 [Source:HGNC Symbol;Acc:HGNC:18259]	protein_coding	0.0101318	0.000495877
ENSG00000270513	AC113368.1	5	+	42729138	42729519	NADH dehydrogenase (ubiquinone) 1 beta subcomplex, 9, 22kDa (NDUFB9) pseudogene	processed_pseudogene	0.0100861	0.000161662
ENSG00000232320	MXRA7P1	2	-	161340816	161341326	MXRA7 pseudogene 1 [Source:HGNC Symbol;Acc:HGNC:54643]	processed_pseudogene	0.0100275	0.000161683
ENSG00000253520	AC136628.3	5	-	179527224	179527513	6-pyruvoyltetrahydropterin synthase (PTS) pseudogene	processed_pseudogene	0.00981501	0.000142308
ENSG00000227914	AL136979.1	9	-	673478	685555	novel transcript	lncRNA	0.00956212	0.000148623
ENSG00000094796	KRT31	17	-	41393721	41397608	keratin 31 [Source:HGNC Symbol;Acc:HGNC:6448]	protein_coding	0.00943136	0.000119976
ENSG00000266120	AC104984.4	17	+	30238741	30252237	novel transcript, antisense to BLMH	lncRNA	0.00922416	0.000235269
ENSG00000286485	Z80897.1	22	+	36766478	36769022	novel transcript, antisense to ANKRD54and IFT27	lncRNA	0.00898315	0.000102073
ENSG00000284740	AL645728.2	1	+	1503250	1509452	ATPase family, AAA domain containing 3C (ATAD3C) pseudogene	transcribed_unprocessed_pseudogene	0.00892782	9.56473e-05
ENSG00000241357	AC092849.1	7	+	100435257	100436510	novel transcript	lncRNA	0.00886239	9.15191e-05
ENSG00000224138	AC000123.1	7	+	127350128	127351523	novel transcript	lncRNA	0.00874023	9.03619e-05
ENSG00000242258	LINC00996	7	+	150433654	150448140	long intergenic non-protein coding RNA 996 [Source:HGNC Symbol;Acc:HGNC:27800]	lncRNA	0.00863747	9.1442e-05
ENSG00000104055	TGM5	15	-	43232590	43266928	transglutaminase 5 [Source:HGNC Symbol;Acc:HGNC:11781]	protein_coding	0.00854723	7.78788e-05
ENSG00000172137	CALB2	16	+	71358713	71390436	calbindin 2 [Source:HGNC Symbol;Acc:HGNC:1435]	protein_coding	0.00852647	8.12411e-24
ENSG00000225506	CYP4A22-AS1	1	-	47096653	47179271	CYP4A22 antisense RNA 1 [Source:HGNC Symbol;Acc:HGNC:43715]	lncRNA	0.007984	5.77716e-05
ENSG00000248300	LINC02360	4	-	11740948	11769468	long intergenic non-protein coding RNA 2360 [Source:HGNC Symbol;Acc:HGNC:53282]	lncRNA	0.00731519	0.000116202
ENSG00000270638	AL023806.1	6	+	145735570	145737218	novel transcript	lncRNA	0.00695631	4.83733e-05
ENSG00000198400	NTRK1	1	+	156815640	156881850	neurotrophic receptor tyrosine kinase 1 [Source:HGNC Symbol;Acc:HGNC:8031]	protein_coding	0.00652653	2.27746e-05
ENSG00000269888	AC112491.1	3	+	161429112	161429613	novel transcript	lncRNA	0.00642275	2.15755e-05
ENSG00000161270	NPHS1	19	-	35825964	35869287	NPHS1 adhesion molecule, nephrin [Source:HGNC Symbol;Acc:HGNC:7908]	protein_coding	0.00624948	2.48865e-05
ENSG00000179428	IL6-AS1	7	-	22725395	22727620	IL6 antisense RNA 1 [Source:HGNC Symbol;Acc:HGNC:40301]	lncRNA	0.00622467	3.89043e-05
ENSG00000258128	MKRN9P	12	-	87782163	87784568	makorin ring finger protein 9, pseudogene [Source:HGNC Symbol;Acc:HGNC:7116]	transcribed_processed_pseudogene	0.00543986	1.35962e-05
ENSG00000161905	ALOX15	17	-	4630919	4642294	arachidonate 15-lipoxygenase [Source:HGNC Symbol;Acc:HGNC:433]	protein_coding	0.0053036	6.17203e-06
ENSG00000223572	CKMT1A	15	+	43692886	43699222	creatine kinase, mitochondrial 1A [Source:HGNC Symbol;Acc:HGNC:31736]	protein_coding	0.00475533	5.76125e-06
ENSG00000140835	CHST4	16	+	71525233	71538748	carbohydrate sulfotransferase 4 [Source:HGNC Symbol;Acc:HGNC:1972]	protein_coding	0.00449694	5.52984e-06
ENSG00000118194	TNNT2	1	-	201359008	201377764	troponin T2, cardiac type [Source:HGNC Symbol;Acc:HGNC:11949]	protein_coding	0.0041285	2.12447e-06
ENSG00000265190	ANXA8	10	-	47460162	47484158	annexin A8 [Source:HGNC Symbol;Acc:HGNC:546]	protein_coding	0.00347891	0.000242245
ENSG00000129173	E2F8	11	-	19224063	19241620	E2F transcription factor 8 [Source:HGNC Symbol;Acc:HGNC:24727]	protein_coding	0.00342795	8.67332e-07
ENSG00000113645	WWC1	5	+	168291645	168472303	WW and C2 domain containing 1 [Source:HGNC Symbol;Acc:HGNC:29435]	protein_coding	0.0033373	3.60946e-09
ENSG00000264230	ANXA8L1	10	+	46375627	46391784	annexin A8 like 1 [Source:HGNC Symbol;Acc:HGNC:23334]	protein_coding	0.00330095	6.09796e-38
ENSG00000196188	CTSE	1	-	206009264	206023895	cathepsin E [Source:HGNC Symbol;Acc:HGNC:2530]	protein_coding	0.00318109	3.8435e-07
ENSG00000142677	IL22RA1	1	-	24119771	24143140	interleukin 22 receptor subunit alpha 1 [Source:HGNC Symbol;Acc:HGNC:13700]	protein_coding	0.00291746	3.2034e-07
ENSG00000184716	SERINC4	15	-	43794162	43800221	serine incorporator 4 [Source:HGNC Symbol;Acc:HGNC:32237]	protein_coding	0.00204052	1.92658e-08
ENSG00000101443	WFDC2	20	+	45469753	45481532	WAP four-disulfide core domain 2 [Source:HGNC Symbol;Acc:HGNC:15939]	protein_coding	0.00113307	9.87323e-10
ENSG00000144227	NXPH2	2	-	138669157	138780390	neurexophilin 2 [Source:HGNC Symbol;Acc:HGNC:8076]	protein_coding	0.00103297	1.64713e-09
ENSG00000183783	KCTD8	4	-	44173903	44448809	potassium channel tetramerization domain containing 8 [Source:HGNC Symbol;Acc:HGNC:22394]	protein_coding	0.000956379	9.88806e-10
ENSG00000132872	SYT4	18	-	43267892	43277535	synaptotagmin 4 [Source:HGNC Symbol;Acc:HGNC:11512]	protein_coding	0.000378213	2.66556e-15
ENSG00000108947	EFNB3	17	+	7705202	7711372	ephrin B3 [Source:HGNC Symbol;Acc:HGNC:3228]	protein_coding	0.000325947	1.85735e-15
ENSG00000085552	IGSF9	1	-	159927039	159945613	immunoglobulin superfamily member 9 [Source:HGNC Symbol;Acc:HGNC:18132]	protein_coding	0.00024267	4.47164e-17
ENSG00000261796	ISY1-RAB43	3	-	129087575	129161036	ISY1-RAB43 readthrough [Source:HGNC Symbol;Acc:HGNC:42969]	protein_coding	0.000182801	1.31e-25
ENSG00000114638	UPK1B	3	+	119173517	119205143	uroplakin 1B [Source:HGNC Symbol;Acc:HGNC:12578]	protein_coding	0.000135256	2.24149e-22
