# Supplementary material for: M1 microglia disrupt the barrier function of retinal microvascular endothelial cells via ANGPT2/TIE2 axis
Source: Research Square preprint supplement (doi:10.21203/rs.3.rs-7163478/v1), 2025-07-24
Supplement: Supplementary file 2 [file 83a19e42c519e431fcae1027.xlsx]

## Sheet: Date Formatting
GeneID	GeneName	Chr	Strand	Start	End	Annotation	Class	FC(M1/M0)	pvalue
ENSG00000283886	BX664615.2	9	-	39816599	39874562	Uncharacterized protein FLJ76381 [Source:UniProtKB/Swiss-Prot;Acc:Q8NFD4]	protein_coding	273.195	2.3023e-55
ENSG00000267904	AC024075.1	19	-	16639967	16640668	novel transcript, sense intronic C19orf42	lncRNA	227.25	1.61454e-17
ENSG00000241697	TMEFF1	9	+	100473149	100577636	transmembrane protein with EGF like and two follistatin like domains 1 [Source:HGNC Symbol;Acc:HGNC:11866]	protein_coding	222.177	4.26068e-60
ENSG00000188242	PP7080	5	-	466124	473098	uncharacterized LOC25845 [Source:NCBI gene (formerly Entrezgene);Acc:25845]	lncRNA	214.836	8.77239e-61
ENSG00000213386	AC022217.1	5	-	172762521	172763258	family with sequence similarity 58, member A (FAM58A) pseudogene	processed_pseudogene	210.41	3.79282e-21
ENSG00000248256	OCIAD1-AS1	4	-	48852008	48860203	OCIAD1 antisense RNA 1 [Source:HGNC Symbol;Acc:HGNC:40751]	lncRNA	178.236	2.73927e-11
ENSG00000284116	AL772307.1	9	-	39983793	40106611	novel transcript	lncRNA	175.663	1.26184e-24
ENSG00000269955	FMC1-LUC7L2	7	+	139341360	139422599	FMC1-LUC7L2 readthrough [Source:HGNC Symbol;Acc:HGNC:44671]	protein_coding	166.013	1.09281e-33
ENSG00000273003	ARL2-SNX15	11	+	65014182	65040570	ARL2-SNX15 readthrough (NMD candidate) [Source:HGNC Symbol;Acc:HGNC:49197]	protein_coding	162.147	3.32468e-44
ENSG00000261796	ISY1-RAB43	3	-	129087575	129161036	ISY1-RAB43 readthrough [Source:HGNC Symbol;Acc:HGNC:42969]	protein_coding	162.118	5.02338e-77
ENSG00000243659	FO393419.3	1	+	27311240	27311838	SMT3 suppressor of mif two 3 homolog 2 (yeast) (SMT3H2) pseudogene	processed_pseudogene	148.245	3.29847e-07
ENSG00000151303	AL136982.1	10	+	86992406	87010203	novel transcript	lncRNA	146.754	7.99146e-68
ENSG00000283765	AC131160.1	3	-	183815568	183884889	presenilin associated rhomboid like [Source:NCBI gene (formerly Entrezgene);Acc:55486]	protein_coding	143.91	8.56395e-49
ENSG00000273118	AC093865.1	2	-	212581357	213021545	novel transcript, sense overlapping IKZF2	lncRNA	134.286	2.17968e-09
ENSG00000254987	AP002989.1	11	-	103675994	103895271	novel transcript	lncRNA	124.7	5.12887e-11
ENSG00000226025	LGALS17A	19	+	39679374	39686373	galectin 14 pseudogene [Source:NCBI gene (formerly Entrezgene);Acc:400696]	transcribed_unprocessed_pseudogene	116.361	1.44418e-14
ENSG00000235947	EGOT	3	-	4749192	4751590	eosinophil granule ontogeny transcript [Source:HGNC Symbol;Acc:HGNC:37129]	lncRNA	115.175	1.62229e-22
ENSG00000235830	SRGAP3-AS4	3	+	9249742	9257507	SRGAP3 antisense RNA 4 [Source:HGNC Symbol;Acc:HGNC:42434]	lncRNA	107.897	3.43643e-08
ENSG00000268366	AC010271.1	19	+	40443436	40444087	novel transcript, antisense to SERTAD3	lncRNA	102.601	2.17968e-09
ENSG00000283183	AC116565.1	4	+	577168	618076	novel transcript	lncRNA	102.233	2.35804e-19
ENSG00000269989	AC036176.3	18	+	63485601	63486018	novel transcript	lncRNA	93.0084	1.04325e-06
ENSG00000186897	C1QL4	12	-	49332409	49337188	complement C1q like 4 [Source:HGNC Symbol;Acc:HGNC:31416]	protein_coding	89.5795	3.02608e-24
ENSG00000280987	MATR3	5	+	139273752	139331671	matrin 3 [Source:NCBI gene (formerly Entrezgene);Acc:9782]	protein_coding	87.0557	7.12757e-27
ENSG00000244380	AC134772.1	3	-	48440352	48446656	novel transcript, antisense to TMA7	lncRNA	85.3968	1.0652e-11
ENSG00000278022	AC118658.1	15	+	98660210	98660668	novel transcript, sense intronic to IGF1R	lncRNA	84.1737	1.04325e-06
ENSG00000231646	FSIP2-AS1	2	-	185652374	185800151	FSIP2 antisense RNA 1 [Source:HGNC Symbol;Acc:HGNC:40978]	lncRNA	82.2362	1.13044e-08
ENSG00000254854	AP003390.1	11	+	119729583	119739623	novel transcript	lncRNA	81.4303	3.29847e-07
ENSG00000130822	PNCK	X	-	153669733	153689010	pregnancy up-regulated nonubiquitous CaM kinase [Source:HGNC Symbol;Acc:HGNC:13415]	protein_coding	79.8931	5.8632e-49
ENSG00000248165	AC110760.1	4	-	74993877	75034824	novel transcript	lncRNA	76.6504	1.05766e-07
ENSG00000273189	AC010619.2	19	+	49474586	49487637	novel transcript	lncRNA	75.737	1.23254e-15
ENSG00000237846	AL773545.3	9	+	40105822	40106527	novel pseudogene	processed_pseudogene	72.3694	1.968e-08
ENSG00000224138	AC000123.1	7	+	127350128	127351523	novel transcript	lncRNA	70.85	1.86576e-06
ENSG00000273565	AL691403.2	14	+	75176929	75177418	novel transcript	lncRNA	70.0624	3.34981e-06
ENSG00000287270	AL137140.1	13	-	77569175	77586812	novel transcript, antisense to SCEL	lncRNA	68.2403	1.79478e-11
ENSG00000236514	AL135791.1	10	+	37857740	37859110	novel transcript	lncRNA	66.7109	6.51239e-09
ENSG00000233721	AL356309.2	9	+	126516417	126518808	novel transcript	lncRNA	65.7324	6.01914e-08
ENSG00000242515	UGT1A10	2	+	233636454	233773305	UDP glucuronosyltransferase family 1 member A10 [Source:HGNC Symbol;Acc:HGNC:12531]	protein_coding	64.1697	9.42216e-21
ENSG00000229155	LINC02038	3	-	193842560	193844024	long intergenic non-protein coding RNA 2038 [Source:HGNC Symbol;Acc:HGNC:52878]	lncRNA	63.4552	6.01914e-08
ENSG00000214407	LINC02085	3	+	101940859	101997926	long intergenic non-protein coding RNA 2085 [Source:HGNC Symbol;Acc:HGNC:27190]	lncRNA	61.8507	1.00433e-17
ENSG00000214300	SPDYE3	7	+	100307702	100322196	speedy/RINGO cell cycle regulator family member E3 [Source:HGNC Symbol;Acc:HGNC:35462]	protein_coding	61.6738	4.53966e-32
ENSG00000278743	AC087239.1	12	-	25385670	25386241	novel transcript	lncRNA	60.4915	3.34981e-06
ENSG00000255439	AC135050.2	16	-	31083439	31094956	novel protein, VKORC1 and PRSS53 readthrough	protein_coding	59.346	3.29847e-07
ENSG00000281887	GIMAP1-GIMAP5	7	+	150716668	150743646	GIMAP1-GIMAP5 readthrough [Source:HGNC Symbol;Acc:HGNC:51257]	protein_coding	58.8521	1.00433e-17
ENSG00000105707	HPN	19	+	35040506	35066571	hepsin [Source:HGNC Symbol;Acc:HGNC:5155]	protein_coding	58.0577	1.00433e-17
ENSG00000267598	AC011446.2	19	-	13153071	13154193	novel transcript, antisense to IER2	lncRNA	56.9725	0
ENSG00000257893	LINC02404	12	+	91876924	91880659	long intergenic non-protein coding RNA 2404 [Source:HGNC Symbol;Acc:HGNC:53331]	lncRNA	55.3126	2.52054e-10
ENSG00000287979	AC253572.1	1	-	120849674	120850985	novel transcript	lncRNA	54.3999	3.75193e-19
ENSG00000287620	AC092053.4	3	+	39177761	39179586	novel transcript	lncRNA	54.367	1.47903e-10
ENSG00000109511	ANXA10	4	+	168092537	168187736	annexin A10 [Source:HGNC Symbol;Acc:HGNC:534]	protein_coding	53.0335	6.01914e-08
ENSG00000259439	LINC01833	2	-	44921077	44939199	long intergenic non-protein coding RNA 1833 [Source:HGNC Symbol;Acc:HGNC:52644]	lncRNA	53.0321	1.79478e-11
ENSG00000243368	MCCC1-AS1	3	+	183016255	183017808	MCCC1 antisense RNA 1 [Source:HGNC Symbol;Acc:HGNC:40366]	lncRNA	52.066	5.85546e-07
ENSG00000256464	YWHABP2	11	-	18490243	18490955	tyrosine 3-monooxygenase/tryptophan 5-monooxygenase activation protein beta pseudogene 2 [Source:HGNC Symbol;Acc:HGNC:50295]	processed_pseudogene	51.8996	1.86576e-06
ENSG00000124678	TCP11	6	-	35118071	35148610	t-complex 11 [Source:HGNC Symbol;Acc:HGNC:11658]	protein_coding	51.0826	1.44418e-14
ENSG00000254101	LINC02055	8	+	135859369	137092183	long intergenic non-protein coding RNA 2055 [Source:HGNC Symbol;Acc:HGNC:52895]	lncRNA	51.058	1.05766e-07
ENSG00000177202	SPACA4	19	+	48606742	48607714	sperm acrosome associated 4 [Source:HGNC Symbol;Acc:HGNC:16441]	protein_coding	50.3115	3.43643e-08
ENSG00000269476	AC010326.2	19	-	57876765	57916591	novel transcript	protein_coding	49.0795	3.43643e-08
ENSG00000240423	LINC00636	3	+	107834586	107928907	long intergenic non-protein coding RNA 636 [Source:HGNC Symbol;Acc:HGNC:27702]	lncRNA	48.8029	7.37431e-10
ENSG00000164007	CLDN19	1	-	42733093	42740254	claudin 19 [Source:HGNC Symbol;Acc:HGNC:2040]	protein_coding	48.2389	2.53718e-22
ENSG00000231701	BMS1P13	9	+	65828120	65831696	BMS1 pseudogene 13 [Source:HGNC Symbol;Acc:HGNC:49158]	unprocessed_pseudogene	45.7618	5.85546e-07
ENSG00000217455	AC073316.1	7	-	3140234	3174654	novel transcript	lncRNA	45.1514	1.04325e-06
ENSG00000125740	FOSB	19	+	45467995	45475179	FosB proto-oncogene, AP-1 transcription factor subunit [Source:HGNC Symbol;Acc:HGNC:3797]	protein_coding	45.04	0
ENSG00000120057	SFRP5	10	-	97766751	97771999	secreted frizzled related protein 5 [Source:HGNC Symbol;Acc:HGNC:10779]	protein_coding	43.4386	2.25505e-12
ENSG00000175161	CADM2	3	+	84958981	86074429	cell adhesion molecule 2 [Source:HGNC Symbol;Acc:HGNC:29849]	protein_coding	42.6875	7.35879e-75
ENSG00000276832	AL354718.3	9	-	41340823	41355538	CMT1A duplicated region transcript 15 (CDRT15) pseudogene	transcribed_unprocessed_pseudogene	42.1539	1.05766e-07
ENSG00000136457	CHAD	17	-	50464496	50468906	chondroadherin [Source:HGNC Symbol;Acc:HGNC:1909]	protein_coding	41.7713	5.12887e-11
ENSG00000271383	NBPF19	1	+	149475338	149556361	NBPF member 19 [Source:HGNC Symbol;Acc:HGNC:31999]	protein_coding	41.2488	1.9678e-248
ENSG00000267774	AC010776.2	18	+	59696459	59698111	novel transcript, antisense to CCBE1	lncRNA	41.0537	1.86463e-07
ENSG00000227155	AL161725.1	9	-	452492	492248	novel transcript	lncRNA	40.3932	1.86463e-07
ENSG00000260302	LINC01882	18	-	12739490	12776140	long intergenic non-protein coding RNA 1882 [Source:HGNC Symbol;Acc:HGNC:52701]	lncRNA	40.0925	1.13044e-08
ENSG00000162772	ATF3	1	+	212565334	212620777	activating transcription factor 3 [Source:HGNC Symbol;Acc:HGNC:785]	protein_coding	39.6877	0
ENSG00000249319	AC068533.4	7	+	66087761	66152277	novel protein	protein_coding	39.2434	3.34981e-06
ENSG00000162771	FAM71A	1	+	212624474	212626775	family with sequence similarity 71 member A [Source:HGNC Symbol;Acc:HGNC:26541]	protein_coding	39.0318	2.92554e-13
ENSG00000286180	AC073140.2	7	-	148940265	148941228	novel transcript	lncRNA	38.9645	1.86576e-06
ENSG00000286825	AL096870.8	14	+	24271726	24279089	novel transcript, antisense to RABGGTA	lncRNA	38.9145	6.01914e-08
ENSG00000213931	HBE1	11	-	5268345	5505652	hemoglobin subunit epsilon 1 [Source:HGNC Symbol;Acc:HGNC:4830]	protein_coding	38.7618	3.34981e-06
ENSG00000234521	AC005041.2	2	-	74407797	74413603	novel retinol dehydrogenase pseudogene	transcribed_unitary_pseudogene	38.6456	1.86576e-06
ENSG00000272779	AC245060.4	22	+	22303224	22310401	BMS1, ribosome biogenesis factor (BSM1) pseudogene	transcribed_unprocessed_pseudogene	38.2949	3.29847e-07
ENSG00000280165	PCDH20	13	-	61409685	61415522	protocadherin 20 [Source:HGNC Symbol;Acc:HGNC:14257]	protein_coding	37.8235	1.75935e-23
ENSG00000107562	CXCL12	10	-	44370165	44386493	C-X-C motif chemokine ligand 12 [Source:HGNC Symbol;Acc:HGNC:10672]	protein_coding	36.7687	3.34981e-06
ENSG00000288100	AL161663.2	14	+	24818385	24820157	novel transcript, antisense to STXBP6	lncRNA	36.674	1.26616e-09
ENSG00000149654	CDH22	20	-	46173739	46308498	cadherin 22 [Source:HGNC Symbol;Acc:HGNC:13251]	protein_coding	36.2521	2.4366e-18
ENSG00000158571	PFKFB1	X	-	54932961	54998534	6-phosphofructo-2-kinase/fructose-2,6-biphosphatase 1 [Source:HGNC Symbol;Acc:HGNC:8872]	protein_coding	36.2043	3.03063e-11
ENSG00000106004	HOXA5	7	-	27141052	27143681	homeobox A5 [Source:HGNC Symbol;Acc:HGNC:5106]	protein_coding	36.0525	1.26616e-09
ENSG00000288640	AC005192.1	7	+	112450460	112490941	novel protein	protein_coding	36.0248	4.65593e-16
ENSG00000259937	AC023158.1	12	-	33404872	33405896	novel transcript, sense intronic to SYT10	lncRNA	35.9235	1.86576e-06
ENSG00000288000	AL031681.3	20	+	43458054	43541881	novel protein	protein_coding	35.4609	2.35804e-19
ENSG00000215097	AL731733.1	10	-	46774421	46776180	dual specificity phosphatase 8 pseudogene 2	processed_pseudogene	34.1395	2.17968e-09
ENSG00000260836	AC245033.1	15	-	82536788	82573194	novel protein	protein_coding	33.6197	1.47903e-10
ENSG00000230724	LINC01001	11	-	127204	139612	long intergenic non-protein coding RNA 1001 [Source:HGNC Symbol;Acc:HGNC:38540]	lncRNA	33.3469	3.34981e-06
ENSG00000285646	AL021155.4	1	+	11907940	11914298	novel transcript	lncRNA	32.8664	3.29847e-07
ENSG00000156076	WIF1	12	-	65050626	65121305	WNT inhibitory factor 1 [Source:HGNC Symbol;Acc:HGNC:18081]	protein_coding	32.866	0
ENSG00000205038	PKHD1L1	8	+	109362461	109537207	PKHD1 like 1 [Source:HGNC Symbol;Acc:HGNC:20313]	protein_coding	32.751	6.03907e-256
ENSG00000188004	SNHG28	1	-	159834480	159855071	small nucleolar RNA host gene 28 [Source:HGNC Symbol;Acc:HGNC:27647]	lncRNA	32.1425	1.54745e-17
ENSG00000283782	AC116366.2	5	+	132410832	132646079	novel protein	protein_coding	31.4783	1.04121e-28
ENSG00000288047	AP001994.3	11	+	119892700	119919996	novel transcript	lncRNA	31.3259	3.34981e-06
ENSG00000213297	ZNF625-ZNF20	19	-	12132117	12156731	ZNF625-ZNF20 readthrough (NMD candidate) [Source:HGNC Symbol;Acc:HGNC:48368]	protein_coding	31.2997	6.01914e-08
ENSG00000238755	LINC02006	3	-	153384934	153980186	long intergenic non-protein coding RNA 2006 [Source:HGNC Symbol;Acc:HGNC:52842]	lncRNA	30.3195	5.51131e-08
ENSG00000173714	WFIKKN2	17	+	50834650	50842353	WAP, follistatin/kazal, immunoglobulin, kunitz and netrin domain containing 2 [Source:HGNC Symbol;Acc:HGNC:30916]	protein_coding	29.3797	2.37414e-14
ENSG00000162897	FCAMR	1	-	206957965	206970625	Fc fragment of IgA and IgM receptor [Source:HGNC Symbol;Acc:HGNC:24692]	protein_coding	29.3522	3.77591e-12
ENSG00000126337	KRT36	17	-	41486136	41492546	keratin 36 [Source:HGNC Symbol;Acc:HGNC:6454]	protein_coding	28.9066	3.43643e-08
ENSG00000285427	SOD2-OT1	6	-	159760258	159762332	SOD2 overlapping transcript 1 [Source:HGNC Symbol;Acc:HGNC:53445]	lncRNA	28.8114	3.43643e-08
ENSG00000110975	SYT10	12	-	33374238	33439819	synaptotagmin 10 [Source:HGNC Symbol;Acc:HGNC:19266]	protein_coding	28.3268	7.56965e-16
ENSG00000287069	AC061958.1	3	-	19389185	19702795	novel transcript, antisense to KCNH8	lncRNA	28.1315	1.968e-08
ENSG00000259884	NR4A1AS	12	-	52058459	52059503	NR4A1 antisense RNA [Source:HGNC Symbol;Acc:HGNC:54409]	lncRNA	28.0089	3.3792e-17
ENSG00000257060	AC091078.1	15	+	93230034	93569483	novel transcript	lncRNA	27.4287	1.13044e-08
ENSG00000261502	AC040174.1	16	-	63056786	63129654	novel transcript	lncRNA	26.6563	1.54543e-11
ENSG00000244122	UGT1A7	2	+	233681938	233773299	UDP glucuronosyltransferase family 1 member A7 [Source:HGNC Symbol;Acc:HGNC:12539]	protein_coding	25.3319	1.18414e-63
ENSG00000230821	AC245291.2	22	+	22446686	22448336	ash2 (absent, small, or homeotic)-like (Drosophila) (ASH2L) pseudogene	processed_pseudogene	25.1368	5.85546e-07
ENSG00000144644	GADL1	3	-	30726200	30894765	glutamate decarboxylase like 1 [Source:HGNC Symbol;Acc:HGNC:27949]	protein_coding	24.8711	1.15655e-39
ENSG00000285816	AP000944.5	11	+	65261928	65326543	novel protein, POLA2-CDC42EP2 readthrough	protein_coding	24.7135	5.21587e-32
ENSG00000260840	LINC01964	2	-	85061213	85067347	long intergenic non-protein coding RNA 1964 [Source:HGNC Symbol;Acc:HGNC:52789]	lncRNA	24.5238	1.47903e-10
ENSG00000231234	SKP1P1	7	-	66423405	66423893	S-phase kinase associated protein 1 pseudogene 1 [Source:HGNC Symbol;Acc:HGNC:33696]	transcribed_processed_pseudogene	23.9609	8.98205e-08
ENSG00000255835	AL117348.2	1	-	225886696	225924278	novel protein	protein_coding	23.6103	1.86576e-06
ENSG00000198723	TEX45	19	+	7492976	7508450	testis expressed 45 [Source:HGNC Symbol;Acc:HGNC:24745]	protein_coding	23.0853	5.85546e-07
ENSG00000260268	LINC00919	16	-	52083064	52085109	long intergenic non-protein coding RNA 919 [Source:HGNC Symbol;Acc:HGNC:48610]	lncRNA	22.9882	1.86576e-06
ENSG00000186481	ANKRD20A5P	18	+	14179097	14252140	ankyrin repeat domain 20 family member A5, pseudogene [Source:HGNC Symbol;Acc:HGNC:33833]	transcribed_unprocessed_pseudogene	22.39	3.29847e-07
ENSG00000273483	AL354760.1	1	-	112517799	112518441	novel transcript, antisense to WNT2B	lncRNA	22.277	3.8114e-06
ENSG00000153234	NR4A2	2	-	156324437	156342348	nuclear receptor subfamily 4 group A member 2 [Source:HGNC Symbol;Acc:HGNC:7981]	protein_coding	22.0277	0
ENSG00000184303	DRD5P1	2	-	91684447	91685884	dopamine receptor D5 pseudogene 1 [Source:HGNC Symbol;Acc:HGNC:3027]	processed_pseudogene	21.9077	3.8114e-06
ENSG00000221857	AC020907.2	19	+	35138824	35151336	novel transcript	lncRNA	21.8624	1.04138e-21
ENSG00000080224	EPHA6	3	+	96814581	97752460	EPH receptor A6 [Source:HGNC Symbol;Acc:HGNC:19296]	protein_coding	21.6063	4.53306e-35
ENSG00000272980	Z94721.2	6	+	166999405	167139141	novel transcript	lncRNA	21.0763	1.23254e-15
ENSG00000214318	ATP5MC1P6	18	+	63496989	63497400	ATP synthase membrane subunit c locus 1 pseudogene 6 [Source:HGNC Symbol;Acc:HGNC:39509]	processed_pseudogene	21.0251	9.60366e-12
ENSG00000283378	CNTNAP3C	9	+	61330717	61453030	contactin associated protein family member 3C [Source:HGNC Symbol;Acc:HGNC:53878]	protein_coding	20.9655	3.34981e-06
ENSG00000261611	AC010547.4	16	-	71447600	71489311	novel transcript	protein_coding	20.9528	8.36559e-22
ENSG00000172995	ARPP21	3	+	35638945	35794496	cAMP regulated phosphoprotein 21 [Source:HGNC Symbol;Acc:HGNC:16968]	protein_coding	20.8678	1.00991e-16
ENSG00000261857	MIA	19	+	40771648	40777490	MIA SH3 domain containing [Source:HGNC Symbol;Acc:HGNC:7076]	protein_coding	20.7876	1.00305e-07
ENSG00000228590	MIR4432HG	2	-	60336446	60439828	MIR4432 host gene [Source:NCBI gene (formerly Entrezgene);Acc:106660609]	lncRNA	20.7342	5.85546e-07
ENSG00000224479	AC104162.1	3	-	63741827	63827445	novel cadherin domain containing pseudogene	transcribed_unitary_pseudogene	20.4467	3.34981e-06
ENSG00000254951	AC044810.2	11	-	7754393	7905955	novel transcript, sense overlapping OR5P2, OR5P3 and OR5P1P	lncRNA	20.3544	5.37036e-19
ENSG00000227477	STK4-AS1	20	-	44963794	44966402	STK4 antisense RNA 1 (head to head) [Source:HGNC Symbol;Acc:HGNC:43811]	lncRNA	20.1038	5.85546e-07
ENSG00000280537	AC068946.1	2	-	219075329	219170827	novel protein, SLC23A3-NHEJ1 readthrough	protein_coding	19.7934	3.77591e-12
ENSG00000183378	OVCH2	11	-	7689437	7706421	ovochymase 2 (gene/pseudogene) [Source:HGNC Symbol;Acc:HGNC:29970]	protein_coding	19.7723	4.48376e-43
ENSG00000198691	ABCA4	1	-	93992834	94121148	ATP binding cassette subfamily A member 4 [Source:HGNC Symbol;Acc:HGNC:34]	protein_coding	19.7472	1.47903e-10
ENSG00000262209	PCDHGB3	5	+	141370242	141512975	protocadherin gamma subfamily B, 3 [Source:HGNC Symbol;Acc:HGNC:8710]	protein_coding	19.6503	1.05766e-07
ENSG00000234814	SVIL2P	10	+	30655489	30717266	supervillin family member 2, pseudogene [Source:HGNC Symbol;Acc:HGNC:44959]	transcribed_unprocessed_pseudogene	19.5198	1.968e-08
ENSG00000261292	AC110491.1	3	+	97759523	97761532	novel transcript	lncRNA	19.2899	1.86576e-06
ENSG00000283945	LINC00032	9	-	27245680	27284869	long intergenic non-protein coding RNA 32 [Source:HGNC Symbol;Acc:HGNC:16506]	transcribed_unprocessed_pseudogene	18.7871	1.968e-08
ENSG00000100652	SLC10A1	14	-	69775416	69797241	solute carrier family 10 member 1 [Source:HGNC Symbol;Acc:HGNC:10905]	protein_coding	18.7862	1.86576e-06
ENSG00000123358	NR4A1	12	+	52022832	52059507	nuclear receptor subfamily 4 group A member 1 [Source:HGNC Symbol;Acc:HGNC:7980]	protein_coding	18.6154	0
ENSG00000160117	ANKLE1	19	+	17281645	17287646	ankyrin repeat and LEM domain containing 1 [Source:HGNC Symbol;Acc:HGNC:26812]	protein_coding	18.4291	3.76241e-09
ENSG00000257390	AC023055.1	12	-	55757275	55827546	novel protein	protein_coding	18.2299	7.45234e-114
ENSG00000250490	LINC02145	5	-	6310441	6339884	long intergenic non-protein coding RNA 2145 [Source:HGNC Symbol;Acc:HGNC:53005]	lncRNA	18.0095	3.29847e-07
ENSG00000170236	USP50	15	-	50494018	50546708	ubiquitin specific peptidase 50 [Source:HGNC Symbol;Acc:HGNC:20079]	protein_coding	17.942	1.43382e-13
ENSG00000285476	AC139491.7	5	+	176063748	176126959	novel transcript	protein_coding	17.9284	1.79478e-11
ENSG00000278616	BEND3P3	10	+	79682997	79685436	BEN domain containing 3 pseudogene 3 [Source:HGNC Symbol;Acc:HGNC:45016]	processed_pseudogene	17.4588	5.85546e-07
ENSG00000164512	ANKRD55	5	-	56099680	56233330	ankyrin repeat domain 55 [Source:HGNC Symbol;Acc:HGNC:25681]	protein_coding	17.0698	5.85546e-07
ENSG00000248672	LY75-CD302	2	-	159771851	159904710	LY75-CD302 readthrough [Source:HGNC Symbol;Acc:HGNC:38828]	protein_coding	17.0238	7.80349e-18
ENSG00000143167	GPA33	1	-	167052836	167166479	glycoprotein A33 [Source:HGNC Symbol;Acc:HGNC:4445]	protein_coding	16.9386	5.85546e-07
ENSG00000156206	CFAP161	15	+	81007033	81149179	cilia and flagella associated protein 161 [Source:HGNC Symbol;Acc:HGNC:26782]	protein_coding	16.0597	5.84182e-11
ENSG00000140955	ADAD2	16	+	84191138	84197168	adenosine deaminase domain containing 2 [Source:HGNC Symbol;Acc:HGNC:30714]	protein_coding	16.0546	1.10649e-14
ENSG00000184845	DRD1	5	-	175440036	175444182	dopamine receptor D1 [Source:HGNC Symbol;Acc:HGNC:3020]	protein_coding	15.9899	1.15757e-40
ENSG00000232316	LINC02518	6	-	113428540	113433555	long intergenic non-protein coding RNA 2518 [Source:HGNC Symbol;Acc:HGNC:53509]	lncRNA	15.5808	2.50841e-30
ENSG00000186777	ZNF732	4	-	270675	305474	zinc finger protein 732 [Source:HGNC Symbol;Acc:HGNC:37138]	protein_coding	15.4874	3.34981e-06
ENSG00000275465	AL449403.3	9	-	96105741	96116411	novel transcript	lncRNA	15.4004	2.40079e-20
ENSG00000285051	SLC7A14-AS1	3	+	170448639	170860993	SLC7A14 antisense RNA 1 [Source:HGNC Symbol;Acc:HGNC:54092]	lncRNA	15.333	4.5979e-15
ENSG00000078795	PKD2L2	5	+	137887968	137942747	polycystin 2 like 2, transient receptor potential cation channel [Source:HGNC Symbol;Acc:HGNC:9012]	protein_coding	15.2014	1.58917e-06
ENSG00000179796	LRRC3B	3	+	26622806	26717537	leucine rich repeat containing 3B [Source:HGNC Symbol;Acc:HGNC:28105]	protein_coding	15.1498	1.77928e-39
ENSG00000261335	AC005837.1	17	+	76671942	76673658	novel transcript, antisense to MXRA7	lncRNA	15.136	3.8114e-06
ENSG00000153531	ADPRHL1	13	-	113399610	113453524	ADP-ribosylhydrolase like 1 [Source:HGNC Symbol;Acc:HGNC:21303]	protein_coding	14.9981	6.63836e-18
ENSG00000180066	LINC02870	10	+	132444327	132449408	long intergenic non-protein coding RNA 2870 [Source:HGNC Symbol;Acc:HGNC:27275]	lncRNA	14.844	9.60366e-12
ENSG00000112149	CD83	6	+	14117256	14136918	CD83 molecule [Source:HGNC Symbol;Acc:HGNC:1703]	protein_coding	14.6544	3.43643e-08
ENSG00000288534	AP001931.2	11	+	57712582	57818431	TMX2-CTNND1 readthrough (NMD candidate)	protein_coding	14.5148	0
ENSG00000170835	CEL	9	+	133061978	133071863	carboxyl ester lipase [Source:HGNC Symbol;Acc:HGNC:1848]	protein_coding	14.389	0
ENSG00000236107	SCN1A-AS1	2	+	165957188	166390771	SCN1A and SCN9A antisense RNA 1 [Source:HGNC Symbol;Acc:HGNC:54069]	lncRNA	14.3394	5.60505e-60
ENSG00000234859	AC003958.2	17	+	41402416	41425049	novel transcript	lncRNA	14.2872	1.86463e-07
ENSG00000102271	KLHL4	X	+	87517409	87670050	kelch like family member 4 [Source:HGNC Symbol;Acc:HGNC:6355]	protein_coding	14.1705	3.55741e-44
ENSG00000178445	GLDC	9	-	6532467	6645729	glycine decarboxylase [Source:HGNC Symbol;Acc:HGNC:4313]	protein_coding	14.1418	3.77454e-44
ENSG00000057468	MSH4	1	+	75796882	75913242	mutS homolog 4 [Source:HGNC Symbol;Acc:HGNC:7327]	protein_coding	13.9288	3.29847e-07
ENSG00000213186	TRIM59	3	-	160432445	160485773	tripartite motif containing 59 [Source:HGNC Symbol;Acc:HGNC:30834]	protein_coding	13.9095	9.73737e-117
ENSG00000285304	Z83844.2	22	+	37639693	37666932	novel protein	protein_coding	13.9059	5.85546e-07
ENSG00000286559	AC099845.1	18	+	39655645	39665494	novel transcript	lncRNA	13.6357	1.86576e-06
ENSG00000179399	GPC5	13	+	91398621	92873682	glypican 5 [Source:HGNC Symbol;Acc:HGNC:4453]	protein_coding	13.367	3.34981e-06
ENSG00000249167	SEMA6A-AS2	5	+	116574482	116611200	SEMA6A antisense RNA 2 [Source:HGNC Symbol;Acc:HGNC:52754]	lncRNA	13.1226	8.59679e-14
ENSG00000165966	PDZRN4	12	+	41188320	41574745	PDZ domain containing ring finger 4 [Source:HGNC Symbol;Acc:HGNC:30552]	protein_coding	13.116	2.16687e-274
ENSG00000288079	AC026329.1	3	-	113259786	113266824	novel transcript, antisense to BOC	lncRNA	13.0179	6.51239e-09
ENSG00000217555	CKLF	16	+	66552563	66566251	chemokine like factor [Source:HGNC Symbol;Acc:HGNC:13253]	protein_coding	12.9906	0
ENSG00000138641	HERC3	4	+	88592434	88708541	HECT and RLD domain containing E3 ubiquitin protein ligase 3 [Source:HGNC Symbol;Acc:HGNC:4876]	protein_coding	12.9653	0
ENSG00000212766	EWSAT1	15	+	69072926	69095820	Ewing sarcoma associated transcript 1 [Source:HGNC Symbol;Acc:HGNC:26596]	lncRNA	12.8429	8.26843e-15
ENSG00000271936	AC012073.1	2	+	24825610	24826717	novel transcript, antisense to ADCY3	lncRNA	12.4289	7.98734e-08
ENSG00000262560	AC018512.1	15	-	43772617	43799133	novel protein	protein_coding	12.2501	2.66339e-08
ENSG00000285314	AC002470.2	22	+	20979462	20998121	novel transcript	lncRNA	12.2352	3.71247e-20
ENSG00000174607	UGT8	4	+	114598770	114678225	UDP glycosyltransferase 8 [Source:HGNC Symbol;Acc:HGNC:12555]	protein_coding	12.1955	4.75327e-28
ENSG00000187905	LRRC74B	22	+	21045960	21064168	leucine rich repeat containing 74B [Source:HGNC Symbol;Acc:HGNC:34301]	protein_coding	12.1417	1.86576e-06
ENSG00000188869	TMC3	15	-	81331088	81374213	transmembrane channel like 3 [Source:HGNC Symbol;Acc:HGNC:22995]	protein_coding	11.6479	1.968e-08
ENSG00000169836	TACR3	4	-	103586031	103719985	tachykinin receptor 3 [Source:HGNC Symbol;Acc:HGNC:11528]	protein_coding	11.5685	4.73333e-18
ENSG00000232706	NUTM2HP	10	+	50676743	50686326	NUT family member 2H, pseudogene [Source:HGNC Symbol;Acc:HGNC:45017]	unprocessed_pseudogene	11.3089	6.49637e-10
ENSG00000173406	DAB1	1	-	56994778	58546734	DAB adaptor protein 1 [Source:HGNC Symbol;Acc:HGNC:2661]	protein_coding	11.1792	1.93999e-52
ENSG00000270210	AC104695.2	2	+	28425945	28426719	novel transcript	lncRNA	11.0224	7.88202e-16
ENSG00000260658	AC138305.1	16	-	63314264	63618046	novel transcript	lncRNA	11.0113	1.65053e-07
ENSG00000267645	AC105052.3	7	-	102637049	102671641	novel protein, POLR2J2-UPK3BL readthrough	protein_coding	10.7043	8.98205e-08
ENSG00000160180	TFF3	21	-	42311667	42315651	trefoil factor 3 [Source:HGNC Symbol;Acc:HGNC:11757]	protein_coding	10.6898	3.00365e-123
ENSG00000270640	AC104695.3	2	+	28396815	28397110	novel transcript, sense intronic to FOSL2	lncRNA	10.6304	3.44571e-36
ENSG00000237094	AL732372.2	1	-	365389	522928	pseudogene similar to part of septin 14 SEPT14	transcribed_unprocessed_pseudogene	10.5287	3.63627e-08
ENSG00000203711	C6orf99	6	+	158869848	158919105	chromosome 6 open reading frame 99 [Source:HGNC Symbol;Acc:HGNC:21179]	lncRNA	10.4506	8.77273e-12
ENSG00000137077	CCL21	9	-	34709005	34710136	C-C motif chemokine ligand 21 [Source:HGNC Symbol;Acc:HGNC:10620]	protein_coding	10.2753	0
ENSG00000117707	PROX1	1	+	213983181	214041510	prospero homeobox 1 [Source:HGNC Symbol;Acc:HGNC:9459]	protein_coding	10.2007	3.95999e-135
ENSG00000286125	AC006115.2	19	+	56669941	56823395	novel transcript (contains ZIM2-AS1 and PEG3-AS1)	lncRNA	9.62496	5.34712e-94
ENSG00000286329	AC108690.1	3	-	80602716	80677898	novel transcript	lncRNA	9.54395	6.0728e-53
ENSG00000077274	CAPN6	X	-	111245099	111270483	calpain 6 [Source:HGNC Symbol;Acc:HGNC:1483]	protein_coding	9.5204	4.92395e-38
ENSG00000242267	SKINT1L	1	-	48096092	48182428	Skint1 like (pseudogene) [Source:HGNC Symbol;Acc:HGNC:33993]	transcribed_unprocessed_pseudogene	9.50328	8.75413e-07
ENSG00000250493	AP004147.1	11	-	120867933	120894797	novel transcript, antisense to GRIK4	lncRNA	9.44442	1.70039e-16
ENSG00000178440	TIMM23B-AGAP6	10	+	49942056	50011654	TIMM23B-AGAP6 readthrough (NMD candidate) [Source:HGNC Symbol;Acc:HGNC:45009]	protein_coding	9.43766	5.35344e-55
ENSG00000139209	SLC38A4	12	-	46764761	46832408	solute carrier family 38 member 4 [Source:HGNC Symbol;Acc:HGNC:14679]	protein_coding	9.31579	0
ENSG00000242338	BMS1P4	10	-	73715843	73730469	BMS1 pseudogene 4 [Source:HGNC Symbol;Acc:HGNC:23652]	transcribed_unprocessed_pseudogene	9.28498	5.57876e-07
ENSG00000274029	AC069209.1	12	+	121190868	121191518	novel transcript	lncRNA	9.14421	1.22309e-06
ENSG00000244332	AL138759.1	10	+	94577439	94611238	novel transcript	lncRNA	8.93816	1.18035e-07
ENSG00000278002	AL627171.1	14	+	49863072	49864379	novel transcript	lncRNA	8.88508	1.58022e-12
ENSG00000259205	PRKXP1	15	-	100553529	100558954	PRKX pseudogene 1 [Source:HGNC Symbol;Acc:HGNC:9442]	processed_pseudogene	8.86335	8.75413e-07
ENSG00000254319	AC246817.2	8	-	2648075	2728577	novel transcript	lncRNA	8.68462	3.21395e-11
ENSG00000285715	AC063960.1	10	-	122017982	122019160	novel transcript, antisense to TACC2	lncRNA	8.61201	2.25988e-81
ENSG00000166856	GPR182	12	+	56994492	56998447	G protein-coupled receptor 182 [Source:HGNC Symbol;Acc:HGNC:13708]	protein_coding	8.59262	7.88202e-16
ENSG00000282855	AC093591.3	4	+	127809170	127809477	INTS3 and NABP interacting protein (INIP) pseudogene	processed_pseudogene	8.57073	6.83351e-07
ENSG00000214279	SCART1	10	+	133453928	133523558	scavenger receptor family member expressed on T cells 1 [Source:HGNC Symbol;Acc:HGNC:32411]	protein_coding	8.44747	9.85203e-17
ENSG00000287190	AC239799.2	1	-	146050441	146052244	novel transcript	lncRNA	8.41389	2.17908e-13
ENSG00000204128	C2orf72	2	+	231037523	231049719	chromosome 2 open reading frame 72 [Source:HGNC Symbol;Acc:HGNC:27418]	protein_coding	8.33875	1.1775e-15
ENSG00000258643	BCL2L2-PABPN1	14	+	23306835	23325369	BCL2L2-PABPN1 readthrough [Source:HGNC Symbol;Acc:HGNC:42959]	protein_coding	8.14135	2.15176e-25
ENSG00000078328	RBFOX1	16	+	5239802	7713340	RNA binding fox-1 homolog 1 [Source:HGNC Symbol;Acc:HGNC:18222]	protein_coding	8.12914	1.19256e-245
ENSG00000091879	ANGPT2	8	-	6499632	6563409	angiopoietin 2 [Source:HGNC Symbol;Acc:HGNC:485]	protein_coding	7.99744	3.74468e-09
ENSG00000173114	LRRN3	7	+	111091006	111125454	leucine rich repeat neuronal 3 [Source:HGNC Symbol;Acc:HGNC:17200]	protein_coding	7.96734	2.779e-283
ENSG00000160867	FGFR4	5	+	177086905	177098144	fibroblast growth factor receptor 4 [Source:HGNC Symbol;Acc:HGNC:3691]	protein_coding	7.87381	3.90026e-11
ENSG00000250125	LINC02232	4	-	64914281	65024485	long intergenic non-protein coding RNA 2232 [Source:HGNC Symbol;Acc:HGNC:53103]	lncRNA	7.83507	6.35767e-31
ENSG00000170345	FOS	14	+	75278826	75282230	Fos proto-oncogene, AP-1 transcription factor subunit [Source:HGNC Symbol;Acc:HGNC:3796]	protein_coding	7.79565	0
ENSG00000150627	WDR17	4	+	176065834	176182818	WD repeat domain 17 [Source:HGNC Symbol;Acc:HGNC:16661]	protein_coding	7.75271	3.10687e-24
ENSG00000183287	CCBE1	18	-	59430939	59697662	collagen and calcium binding EGF domains 1 [Source:HGNC Symbol;Acc:HGNC:29426]	protein_coding	7.69078	2.0127e-104
ENSG00000166596	CFAP52	17	+	9576627	9643447	cilia and flagella associated protein 52 [Source:HGNC Symbol;Acc:HGNC:16053]	protein_coding	7.67965	2.64847e-07
ENSG00000030582	GRN	17	+	44345246	44353106	granulin precursor [Source:HGNC Symbol;Acc:HGNC:4601]	protein_coding	7.67743	6.26372e-12
ENSG00000173212	MAB21L3	1	+	116111755	116135240	mab-21 like 3 [Source:HGNC Symbol;Acc:HGNC:26787]	protein_coding	7.66349	6.17831e-27
ENSG00000179915	NRXN1	2	-	49918503	51225575	neurexin 1 [Source:HGNC Symbol;Acc:HGNC:8008]	protein_coding	7.61896	6.57007e-16
ENSG00000264324	AC006030.1	2	-	74211604	74363377	novel protein	protein_coding	7.61819	1.0098e-25
ENSG00000104112	SCG3	15	+	51681492	51721026	secretogranin III [Source:HGNC Symbol;Acc:HGNC:13707]	protein_coding	7.49608	2.09367e-10
ENSG00000246792	AC106038.1	8	+	90646420	90670929	novel transcript	lncRNA	7.47256	2.01487e-08
ENSG00000203734	ECT2L	6	+	138795911	138904070	epithelial cell transforming 2 like [Source:HGNC Symbol;Acc:HGNC:21118]	protein_coding	7.24726	6.5519e-11
ENSG00000267179	AC008770.2	19	+	11925075	11979290	novel protein	protein_coding	7.22334	4.48305e-08
ENSG00000260310	AC027277.2	16	-	10576499	10578183	novel transcript, sense intronic to EMP2	lncRNA	7.14905	2.57013e-08
ENSG00000276216	AC245014.3	1	+	145281116	145281462	novel transcript	lncRNA	7.10231	1.47052e-08
ENSG00000166257	SCN3B	11	-	123629187	123655244	sodium voltage-gated channel beta subunit 3 [Source:HGNC Symbol;Acc:HGNC:20665]	protein_coding	7.10176	1.47006e-64
ENSG00000110492	MDK	11	+	46380756	46383837	midkine [Source:HGNC Symbol;Acc:HGNC:6972]	protein_coding	7.09208	1.01833e-119
ENSG00000273238	TMEM271	4	-	573880	576295	transmembrane protein 271 [Source:HGNC Symbol;Acc:HGNC:53639]	protein_coding	7.08152	5.05016e-11
ENSG00000172818	OVOL1	11	+	65787063	65797214	ovo like transcriptional repressor 1 [Source:HGNC Symbol;Acc:HGNC:8525]	protein_coding	7.07555	0
ENSG00000254863	LINC02744	11	-	119987952	119995037	long intergenic non-protein coding RNA 2744 [Source:HGNC Symbol;Acc:HGNC:54262]	lncRNA	7.06883	1.11533e-08
ENSG00000128271	ADORA2A	22	+	24417879	24442357	adenosine A2a receptor [Source:HGNC Symbol;Acc:HGNC:263]	protein_coding	7.05309	3.39843e-10
ENSG00000260331	AC079148.1	2	-	18547386	18548204	novel transcript	lncRNA	6.96364	2.73526e-06
ENSG00000235725	AC007389.2	2	-	65589566	65640177	novel transcript	lncRNA	6.93567	8.77915e-10
ENSG00000179477	ALOX12B	17	-	8072636	8087716	arachidonate 12-lipoxygenase, 12R type [Source:HGNC Symbol;Acc:HGNC:430]	protein_coding	6.87301	2.12256e-07
ENSG00000275340	FGD5P1	3	+	13933056	13937477	FYVE, RhoGEF and PH domain containing 5 pseudogene 1 [Source:HGNC Symbol;Acc:HGNC:44498]	transcribed_unprocessed_pseudogene	6.85584	2.64847e-07
ENSG00000186352	ANKRD37	4	+	185396021	185400628	ankyrin repeat domain 37 [Source:HGNC Symbol;Acc:HGNC:29593]	protein_coding	6.83461	6.80159e-224
ENSG00000203786	KPRP	1	+	152759561	152762052	keratinocyte proline rich protein [Source:HGNC Symbol;Acc:HGNC:31823]	protein_coding	6.79577	1.20435e-11
ENSG00000230457	PA2G4P4	3	-	156809551	156810732	proliferation-associated 2G4 pseudogene 4 [Source:HGNC Symbol;Acc:HGNC:32217]	processed_pseudogene	6.7938	1.22309e-06
ENSG00000177606	JUN	1	-	58780791	58784047	Jun proto-oncogene, AP-1 transcription factor subunit [Source:HGNC Symbol;Acc:HGNC:6204]	protein_coding	6.76648	0
ENSG00000120129	DUSP1	5	-	172768096	172771195	dual specificity phosphatase 1 [Source:HGNC Symbol;Acc:HGNC:3064]	protein_coding	6.72477	0
ENSG00000267056	AC005336.1	19	-	15910582	15911824	inositol polyphosphate multikinase (IPMK) pseudogene	processed_pseudogene	6.68686	1.9171e-09
ENSG00000260391	AC022336.2	3	+	124723788	124726325	novel transcript, overlapping to KALRN	lncRNA	6.63248	2.12709e-11
ENSG00000134548	SPX	12	+	21526296	21541249	spexin hormone [Source:HGNC Symbol;Acc:HGNC:28139]	protein_coding	6.59974	4.66783e-10
ENSG00000187987	ZSCAN23	6	-	28431930	28443502	zinc finger and SCAN domain containing 23 [Source:HGNC Symbol;Acc:HGNC:21193]	protein_coding	6.59697	8.84666e-12
ENSG00000260342	AC138811.2	16	-	18788063	18801519	novel protein	protein_coding	6.58444	1.82531e-24
ENSG00000131969	ABHD12B	14	+	50872053	50904970	abhydrolase domain containing 12B [Source:HGNC Symbol;Acc:HGNC:19837]	protein_coding	6.50192	8.38588e-07
ENSG00000133067	LGR6	1	+	202193901	202319781	leucine rich repeat containing G protein-coupled receptor 6 [Source:HGNC Symbol;Acc:HGNC:19719]	protein_coding	6.49109	0
ENSG00000230183	CNOT6LP1	15	-	56005715	56007176	CNOT6L pseudogene 1 [Source:HGNC Symbol;Acc:HGNC:32355]	processed_pseudogene	6.46443	3.58453e-10
ENSG00000236938	AC003092.2	7	-	94071759	94077157	novel transcript	lncRNA	6.45471	2.62896e-16
ENSG00000164398	ACSL6	5	-	131949973	132012243	acyl-CoA synthetase long chain family member 6 [Source:HGNC Symbol;Acc:HGNC:16496]	protein_coding	6.40161	2.9188e-28
ENSG00000182885	ADGRG3	16	+	57668277	57689378	adhesion G protein-coupled receptor G3 [Source:HGNC Symbol;Acc:HGNC:13728]	protein_coding	6.36332	1.20294e-22
ENSG00000213033	AURKAP1	1	-	220266706	220267917	aurora kinase A pseudogene 1 [Source:HGNC Symbol;Acc:HGNC:18611]	transcribed_processed_pseudogene	6.35297	1.47052e-08
ENSG00000251485	NRBF2P6	2	+	232343116	232343903	NRBF2 pseudogene 6 [Source:HGNC Symbol;Acc:HGNC:54797]	processed_pseudogene	6.30382	4.36773e-10
ENSG00000123700	KCNJ2	17	+	70168673	70180044	potassium inwardly rectifying channel subfamily J member 2 [Source:HGNC Symbol;Acc:HGNC:6263]	protein_coding	6.28283	0
ENSG00000009950	MLXIPL	7	-	73593194	73624543	MLX interacting protein like [Source:HGNC Symbol;Acc:HGNC:12744]	protein_coding	6.27346	5.12691e-53
ENSG00000273763	AC007318.1	2	-	65203502	65227605	marker of proliferation Ki-67 (MKI67) pseudogene	transcribed_processed_pseudogene	6.27277	2.00941e-15
ENSG00000203804	ADAMTSL4-AS1	1	-	150560202	150574552	ADAMTSL4 antisense RNA 1 [Source:HGNC Symbol;Acc:HGNC:32041]	lncRNA	6.25688	7.79778e-13
ENSG00000131738	KRT33B	17	-	41363498	41369813	keratin 33B [Source:HGNC Symbol;Acc:HGNC:6451]	protein_coding	6.24697	4.48305e-08
ENSG00000270022	Z93241.1	22	+	42615244	42615907	RNA, U12 small nuclear	lncRNA	6.18573	1.8412e-06
ENSG00000257524	AL157935.2	9	-	127867850	127906022	novel protein	protein_coding	6.14989	0
ENSG00000159337	PLA2G4D	15	-	42067009	42094562	phospholipase A2 group IVD [Source:HGNC Symbol;Acc:HGNC:30038]	protein_coding	6.13274	2.03283e-17
ENSG00000248383	PCDHAC1	5	+	140926299	141012347	protocadherin alpha subfamily C, 1 [Source:HGNC Symbol;Acc:HGNC:8676]	protein_coding	6.11284	2.75377e-09
ENSG00000263063	AC024361.2	17	-	82713908	82716255	novel transcript	lncRNA	6.09504	1.8412e-06
ENSG00000141431	ASXL3	18	+	33578219	33751195	ASXL transcriptional regulator 3 [Source:HGNC Symbol;Acc:HGNC:29357]	protein_coding	6.09065	3.05316e-50
ENSG00000182379	NXPH4	12	+	57216794	57226449	neurexophilin 4 [Source:HGNC Symbol;Acc:HGNC:8078]	protein_coding	6.08943	6.98364e-31
ENSG00000224940	PRRT4	7	-	128350325	128361685	proline rich transmembrane protein 4 [Source:HGNC Symbol;Acc:HGNC:37280]	protein_coding	6.05628	1.8412e-06
ENSG00000258592	AL391152.1	14	-	57066260	57112660	novel transcript	lncRNA	6.01127	8.9826e-08
ENSG00000241111	PRICKLE2-AS1	3	+	64067964	64103131	PRICKLE2 antisense RNA 1 [Source:NCBI gene (formerly Entrezgene);Acc:100652759]	lncRNA	5.95469	2.01487e-08
ENSG00000153132	CLGN	4	-	140388453	140427661	calmegin [Source:HGNC Symbol;Acc:HGNC:2060]	protein_coding	5.94528	3.18078e-55
ENSG00000284946	AC068831.6	15	-	90966190	91022566	novel protein	protein_coding	5.92671	3.14439e-18
ENSG00000084628	NKAIN1	1	-	31179745	31239887	sodium/potassium transporting ATPase interacting 1 [Source:HGNC Symbol;Acc:HGNC:25743]	protein_coding	5.92435	3.34122e-09
ENSG00000185710	SMG1P4	16	-	21879338	21919156	SMG1 pseudogene 4 [Source:HGNC Symbol;Acc:HGNC:49861]	transcribed_unprocessed_pseudogene	5.84625	3.89569e-06
ENSG00000108759	KRT32	17	-	41459811	41467429	keratin 32 [Source:HGNC Symbol;Acc:HGNC:6449]	protein_coding	5.82942	3.47358e-35
ENSG00000273419	AC004877.1	7	-	149858400	149862492	novel transcript, antisense to ZNF862	lncRNA	5.82138	3.81145e-07
ENSG00000143882	ATP6V1C2	2	+	10721100	10785110	ATPase H+ transporting V1 subunit C2 [Source:HGNC Symbol;Acc:HGNC:18264]	protein_coding	5.80221	3.19749e-126
ENSG00000175697	GPR156	3	-	120164645	120285094	G protein-coupled receptor 156 [Source:HGNC Symbol;Acc:HGNC:20844]	protein_coding	5.79159	1.18035e-07
ENSG00000260645	AL359715.2	6	+	80466958	80469080	novel transcript	lncRNA	5.79107	0
ENSG00000144057	ST6GAL2	2	-	106801600	106887108	ST6 beta-galactoside alpha-2,6-sialyltransferase 2 [Source:HGNC Symbol;Acc:HGNC:10861]	protein_coding	5.7646	0
ENSG00000197934	CYYR1-AS1	21	+	26393635	26569252	CYYR1 antisense RNA 1 [Source:HGNC Symbol;Acc:HGNC:39560]	lncRNA	5.71985	1.22309e-06
ENSG00000013293	SLC7A14	3	-	170459548	170586075	solute carrier family 7 member 14 [Source:HGNC Symbol;Acc:HGNC:29326]	protein_coding	5.67348	5.12455e-31
ENSG00000260781	ARHGAP23P1	16	-	33907419	33937167	Rho GTPase activating protein 23 pseudogene 1 [Source:HGNC Symbol;Acc:HGNC:45039]	transcribed_unprocessed_pseudogene	5.65121	3.01653e-13
ENSG00000275004	ZNF280B	22	-	22484421	22508742	zinc finger protein 280B [Source:HGNC Symbol;Acc:HGNC:23022]	protein_coding	5.64133	8.48054e-182
ENSG00000259522	AL136295.4	14	-	24180395	24190416	novel protein	protein_coding	5.63915	1.97277e-119
ENSG00000107518	ATRNL1	10	+	115093365	115948999	attractin like 1 [Source:HGNC Symbol;Acc:HGNC:29063]	protein_coding	5.63875	2.14882e-46
ENSG00000158887	MPZ	1	-	161304735	161309968	myelin protein zero [Source:HGNC Symbol;Acc:HGNC:7225]	protein_coding	5.62318	2.00401e-135
ENSG00000109163	GNRHR	4	-	67737118	67754388	gonadotropin releasing hormone receptor [Source:HGNC Symbol;Acc:HGNC:4421]	protein_coding	5.59219	2.12256e-07
ENSG00000259219	AC084855.2	15	+	99976481	99980774	novel transcript, antisense to ADAMTS17	lncRNA	5.58524	2.73526e-06
ENSG00000128016	ZFP36	19	+	39406847	39409412	ZFP36 ring finger protein [Source:HGNC Symbol;Acc:HGNC:12862]	protein_coding	5.57784	0
ENSG00000188659	SAXO2	15	+	82262810	82284930	stabilizer of axonemal microtubules 2 [Source:HGNC Symbol;Acc:HGNC:33727]	protein_coding	5.54689	1.77098e-09
ENSG00000232648	AC107214.1	4	-	183494884	183504494	novel transcript	lncRNA	5.52876	1.8304e-06
ENSG00000159388	BTG2	1	+	203305491	203309602	BTG anti-proliferation factor 2 [Source:HGNC Symbol;Acc:HGNC:1131]	protein_coding	5.47659	0
ENSG00000197181	PIWIL2	8	+	22275316	22357568	piwi like RNA-mediated gene silencing 2 [Source:HGNC Symbol;Acc:HGNC:17644]	protein_coding	5.45575	7.49394e-34
ENSG00000121207	LRAT	4	+	154626945	154753120	lecithin retinol acyltransferase [Source:HGNC Symbol;Acc:HGNC:6685]	protein_coding	5.44827	2.74738e-47
ENSG00000260996	BX255925.1	9	-	137293868	137295721	novel transcript, overlapping NRARP	lncRNA	5.42981	9.10406e-15
ENSG00000153707	PTPRD	9	-	8314246	10612723	protein tyrosine phosphatase receptor type D [Source:HGNC Symbol;Acc:HGNC:9668]	protein_coding	5.31525	2.0316e-182
ENSG00000136997	MYC	8	+	127735434	127742951	MYC proto-oncogene, bHLH transcription factor [Source:HGNC Symbol;Acc:HGNC:7553]	protein_coding	5.30463	0
ENSG00000196233	LCOR	10	+	96832254	96995956	ligand dependent nuclear receptor corepressor [Source:HGNC Symbol;Acc:HGNC:29503]	protein_coding	5.2988	0
ENSG00000233008	LINC01725	1	-	83575776	83861023	long intergenic non-protein coding RNA 1725 [Source:HGNC Symbol;Acc:HGNC:52513]	lncRNA	5.28672	2.2926e-06
ENSG00000080493	SLC4A4	4	+	71062667	71572087	solute carrier family 4 member 4 [Source:HGNC Symbol;Acc:HGNC:11030]	protein_coding	5.19439	4.57102e-160
ENSG00000089250	NOS1	12	-	117208142	117452170	nitric oxide synthase 1 [Source:HGNC Symbol;Acc:HGNC:7872]	protein_coding	5.17895	1.78769e-115
ENSG00000157423	HYDIN	16	-	70802084	71230722	HYDIN axonemal central pair apparatus protein [Source:HGNC Symbol;Acc:HGNC:19368]	protein_coding	5.17423	1.16096e-09
ENSG00000233967	AL359715.1	6	+	80441295	80466674	novel transcript	lncRNA	5.16836	0
ENSG00000255216	AP001360.1	11	-	120008044	120013620	novel transcript	lncRNA	5.13922	2.28792e-35
ENSG00000265933	LINC00668	18	-	6919496	6929966	long intergenic non-protein coding RNA 668 [Source:HGNC Symbol;Acc:HGNC:44328]	lncRNA	5.12443	1.30376e-10
ENSG00000197320	AC060834.1	7	+	9726241	9728272	C3 and PZP-like, alpha-2-macroglobulin domain containing 8 (CPAMD8) pseudogene	processed_pseudogene	5.08914	8.9826e-08
ENSG00000267892	AC022144.1	19	+	38738284	38739863	novel transcript, antisense to CAPN12	lncRNA	5.04641	1.6234e-12
ENSG00000230461	PROX1-AS1	1	-	213817751	213988508	PROX1 antisense RNA 1 [Source:HGNC Symbol;Acc:HGNC:43656]	lncRNA	5.03216	4.75925e-13
ENSG00000115361	ACADL	2	-	210187126	210225447	acyl-CoA dehydrogenase long chain [Source:HGNC Symbol;Acc:HGNC:88]	protein_coding	4.98729	2.41603e-08
ENSG00000278662	GOLGA6L10	15	-	82339993	82349475	golgin A6 family like 10 [Source:HGNC Symbol;Acc:HGNC:37228]	protein_coding	4.96675	5.87967e-45
ENSG00000285852	AL353147.1	10	-	19812372	19816278	novel transcript	lncRNA	4.96304	1.03702e-12
ENSG00000260368	AC027373.1	8	-	100913247	100914388	novel transcript, overlapping YWHAZ	lncRNA	4.91232	1.54227e-10
ENSG00000163273	NPPC	2	-	231921809	231926396	natriuretic peptide C [Source:HGNC Symbol;Acc:HGNC:7941]	protein_coding	4.90008	2.45315e-08
ENSG00000253953	PCDHGB4	5	+	141387698	141512975	protocadherin gamma subfamily B, 4 [Source:HGNC Symbol;Acc:HGNC:8711]	protein_coding	4.88556	1.34197e-22
ENSG00000184557	SOCS3	17	-	78356778	78360077	suppressor of cytokine signaling 3 [Source:HGNC Symbol;Acc:HGNC:19391]	protein_coding	4.87138	0
ENSG00000080644	CHRNA3	15	-	78593052	78621295	cholinergic receptor nicotinic alpha 3 subunit [Source:HGNC Symbol;Acc:HGNC:1957]	protein_coding	4.86938	4.17697e-22
ENSG00000127366	TAS2R5	7	+	141790217	141791367	taste 2 receptor member 5 [Source:HGNC Symbol;Acc:HGNC:14912]	protein_coding	4.85833	5.79936e-11
ENSG00000144191	CNGA3	2	+	98346188	98398601	cyclic nucleotide gated channel subunit alpha 3 [Source:HGNC Symbol;Acc:HGNC:2150]	protein_coding	4.85239	1.3894e-13
ENSG00000179388	EGR3	8	-	22687659	22693480	early growth response 3 [Source:HGNC Symbol;Acc:HGNC:3240]	protein_coding	4.83495	2.87454e-22
ENSG00000134240	HMGCS2	1	-	119748002	119768905	3-hydroxy-3-methylglutaryl-CoA synthase 2 [Source:HGNC Symbol;Acc:HGNC:5008]	protein_coding	4.81083	1.20294e-06
ENSG00000267519	AC020916.1	19	-	13823880	13842928	novel transcript	lncRNA	4.80031	0
ENSG00000131737	KRT34	17	-	41377650	41382403	keratin 34 [Source:HGNC Symbol;Acc:HGNC:6452]	protein_coding	4.7909	6.91115e-13
ENSG00000181449	SOX2	3	+	181711925	181714436	SRY-box transcription factor 2 [Source:HGNC Symbol;Acc:HGNC:11195]	protein_coding	4.77748	1.12907e-15
ENSG00000284672	AC109583.4	3	-	46742092	46812558	novel transcript	lncRNA	4.77727	6.99705e-07
ENSG00000189143	CLDN4	7	+	73799542	73832693	claudin 4 [Source:HGNC Symbol;Acc:HGNC:2046]	protein_coding	4.76063	0
ENSG00000087074	PPP1R15A	19	+	48872421	48876058	protein phosphatase 1 regulatory subunit 15A [Source:HGNC Symbol;Acc:HGNC:14375]	protein_coding	4.74263	0
ENSG00000002745	WNT16	7	+	121325367	121341104	Wnt family member 16 [Source:HGNC Symbol;Acc:HGNC:16267]	protein_coding	4.71832	1.46767e-08
ENSG00000215045	GRID2IP	7	-	6497462	6551436	Grid2 interacting protein [Source:HGNC Symbol;Acc:HGNC:18464]	protein_coding	4.71807	1.39502e-08
ENSG00000177463	NR2C2	3	+	14947584	15053600	nuclear receptor subfamily 2 group C member 2 [Source:HGNC Symbol;Acc:HGNC:7972]	protein_coding	4.70999	0
ENSG00000228830	AL160408.2	1	+	234607008	234609483	novel transcript	lncRNA	4.70693	1.68466e-10
ENSG00000283635	AC012485.3	2	+	238289127	238300185	novel transcript, antisense to PER2	lncRNA	4.70096	1.94831e-09
ENSG00000144868	TMEM108	3	+	133038391	133397792	transmembrane protein 108 [Source:HGNC Symbol;Acc:HGNC:28451]	protein_coding	4.69856	8.2502e-81
ENSG00000253873	PCDHGA11	5	+	141421047	141512975	protocadherin gamma subfamily A, 11 [Source:HGNC Symbol;Acc:HGNC:8698]	protein_coding	4.65732	8.25874e-09
ENSG00000261553	AL137782.1	13	+	75549773	75807120	novel transcript	lncRNA	4.6562	5.34712e-50
ENSG00000227121	LINC02672	10	-	52972612	53030024	long intergenic non-protein coding RNA 2672 [Source:HGNC Symbol;Acc:HGNC:54159]	lncRNA	4.65438	1.10807e-07
ENSG00000198590	C3orf35	3	+	37381062	37440186	chromosome 3 open reading frame 35 [Source:HGNC Symbol;Acc:HGNC:24082]	lncRNA	4.64807	8.98774e-07
ENSG00000165973	NELL1	11	+	20669551	21575686	neural EGFL like 1 [Source:HGNC Symbol;Acc:HGNC:7750]	protein_coding	4.64662	8.75479e-123
ENSG00000240219	AL512306.2	1	+	204626775	204629712	novel transcript	lncRNA	4.6465	5.45081e-09
ENSG00000171223	JUNB	19	+	12791486	12793315	JunB proto-oncogene, AP-1 transcription factor subunit [Source:HGNC Symbol;Acc:HGNC:6205]	protein_coding	4.63849	0
ENSG00000181722	ZBTB20	3	-	114314500	115147288	zinc finger and BTB domain containing 20 [Source:HGNC Symbol;Acc:HGNC:13503]	protein_coding	4.62951	3.37185e-08
ENSG00000130829	DUSP9	X	+	153642492	153651326	dual specificity phosphatase 9 [Source:HGNC Symbol;Acc:HGNC:3076]	protein_coding	4.62686	3.35551e-24
ENSG00000136826	KLF4	9	-	107484852	107490482	Kruppel like factor 4 [Source:HGNC Symbol;Acc:HGNC:6348]	protein_coding	4.62517	0
ENSG00000102385	DRP2	X	+	101219769	101264497	dystrophin related protein 2 [Source:HGNC Symbol;Acc:HGNC:3032]	protein_coding	4.62365	5.43841e-23
ENSG00000179899	PHC1P1	12	-	55411727	55414787	polyhomeotic homolog 1 pseudogene 1 [Source:HGNC Symbol;Acc:HGNC:34502]	processed_pseudogene	4.61353	8.25874e-09
ENSG00000182040	USH1G	17	-	74916083	74923256	USH1 protein network component sans [Source:HGNC Symbol;Acc:HGNC:16356]	protein_coding	4.58988	1.21885e-60
ENSG00000215452	ZNF663P	20	-	46414228	46459276	zinc finger protein 663, pseudogene [Source:HGNC Symbol;Acc:HGNC:25342]	transcribed_unitary_pseudogene	4.58369	1.22309e-06
ENSG00000141579	ZNF750	17	-	82829434	82840022	zinc finger protein 750 [Source:HGNC Symbol;Acc:HGNC:25843]	protein_coding	4.58139	0
ENSG00000251323	LINC02728	11	-	78423982	78429836	long intergenic non-protein coding RNA 2728 [Source:HGNC Symbol;Acc:HGNC:54245]	lncRNA	4.57504	1.51084e-08
ENSG00000272610	MAGI1-IT1	3	-	65872815	65954558	MAGI1 intronic transcript 1 [Source:HGNC Symbol;Acc:HGNC:42436]	lncRNA	4.56803	2.71498e-10
ENSG00000197705	KLHL14	18	-	32672673	32773023	kelch like family member 14 [Source:HGNC Symbol;Acc:HGNC:29266]	protein_coding	4.54859	0
ENSG00000131183	SLC34A1	5	+	177379235	177398848	solute carrier family 34 member 1 [Source:HGNC Symbol;Acc:HGNC:11019]	protein_coding	4.54319	3.86542e-11
ENSG00000163746	PLSCR2	3	-	146391421	146495991	phospholipid scramblase 2 [Source:HGNC Symbol;Acc:HGNC:16494]	protein_coding	4.51938	1.45494e-07
ENSG00000254165	AC090739.1	8	-	42537529	42538304	novel transcript	lncRNA	4.51514	2.83501e-10
ENSG00000163661	PTX3	3	+	157436850	157443633	pentraxin 3 [Source:HGNC Symbol;Acc:HGNC:9692]	protein_coding	4.51044	7.93248e-32
ENSG00000176383	B3GNT4	12	+	122203681	122208952	UDP-GlcNAc:betaGal beta-1,3-N-acetylglucosaminyltransferase 4 [Source:HGNC Symbol;Acc:HGNC:15683]	protein_coding	4.50075	2.97163e-22
ENSG00000241489	AC244197.3	X	-	149477104	149540926	novel protein	protein_coding	4.49078	0
ENSG00000145632	PLK2	5	-	58453982	58460139	polo like kinase 2 [Source:HGNC Symbol;Acc:HGNC:19699]	protein_coding	4.48675	0
ENSG00000242550	SERPINB10	18	+	63897174	63936111	serpin family B member 10 [Source:HGNC Symbol;Acc:HGNC:8942]	protein_coding	4.4556	8.68333e-35
ENSG00000213089	PDCL3P5	6	+	150827663	150828384	PDCL3 pseudogene 5 [Source:HGNC Symbol;Acc:HGNC:44506]	processed_pseudogene	4.42687	3.826e-06
ENSG00000163873	GRIK3	1	-	36795527	37034515	glutamate ionotropic receptor kainate type subunit 3 [Source:HGNC Symbol;Acc:HGNC:4581]	protein_coding	4.42585	2.2607e-11
ENSG00000188883	KLRG2	7	-	139452690	139483673	killer cell lectin like receptor G2 [Source:HGNC Symbol;Acc:HGNC:24778]	protein_coding	4.41196	3.10922e-25
ENSG00000140470	ADAMTS17	15	-	99971437	100342005	ADAM metallopeptidase with thrombospondin type 1 motif 17 [Source:HGNC Symbol;Acc:HGNC:17109]	protein_coding	4.41026	9.4199e-67
ENSG00000144354	CDCA7	2	+	173354820	173368997	cell division cycle associated 7 [Source:HGNC Symbol;Acc:HGNC:14628]	protein_coding	4.40676	6.1488e-146
ENSG00000113396	SLC27A6	5	+	128538013	129033642	solute carrier family 27 member 6 [Source:HGNC Symbol;Acc:HGNC:11000]	protein_coding	4.4063	2.72477e-43
ENSG00000238035	AC138035.1	5	+	181306502	181324685	novel transcript	lncRNA	4.40624	1.12583e-07
ENSG00000163492	CCDC141	2	-	178829757	179050086	coiled-coil domain containing 141 [Source:HGNC Symbol;Acc:HGNC:26821]	protein_coding	4.39949	5.68617e-25
ENSG00000288009	AL353135.2	6	-	89130887	89145985	novel transcript	lncRNA	4.39311	7.58737e-10
ENSG00000130598	TNNI2	11	+	1838981	1841680	troponin I2, fast skeletal type [Source:HGNC Symbol;Acc:HGNC:11946]	protein_coding	4.36828	0
ENSG00000253797	UTP14C	13	+	52024691	52033600	UTP14C small subunit processome component [Source:HGNC Symbol;Acc:HGNC:20321]	protein_coding	4.36575	4.40498e-103
ENSG00000281106	TMEM272	13	-	51813347	51845177	transmembrane protein 272 [Source:HGNC Symbol;Acc:HGNC:26737]	protein_coding	4.36559	2.86186e-07
ENSG00000241484	ARHGAP8	22	+	44752558	44862788	Rho GTPase activating protein 8 [Source:HGNC Symbol;Acc:HGNC:677]	protein_coding	4.3411	1.98516e-18
ENSG00000282390	AL392083.1	10	-	1290018	1293002	novel transcript, sense intronic to ADARB2	lncRNA	4.32862	2.34313e-14
ENSG00000204928	GRXCR2	5	-	145858521	145937126	glutaredoxin and cysteine rich domain containing 2 [Source:HGNC Symbol;Acc:HGNC:33862]	protein_coding	4.29162	3.73339e-06
ENSG00000176595	KBTBD11	8	+	1973677	2006936	kelch repeat and BTB domain containing 11 [Source:HGNC Symbol;Acc:HGNC:29104]	protein_coding	4.29049	9.43336e-97
ENSG00000287792	AC140118.2	12	-	131350844	131371721	novel transcript	lncRNA	4.2795	4.09e-08
ENSG00000160888	IER2	19	+	13150411	13154911	immediate early response 2 [Source:HGNC Symbol;Acc:HGNC:28871]	protein_coding	4.27032	0
ENSG00000228789	HCG22	6	+	31053450	31059890	HLA complex group 22 (gene/pseudogene) [Source:HGNC Symbol;Acc:HGNC:27780]	transcribed_unprocessed_pseudogene	4.25006	1.38973e-150
ENSG00000285681	AC091576.1	18	+	60329190	60540205	novel transcript, antisense to MC4R	lncRNA	4.24897	7.62254e-19
ENSG00000251429	AIDAP2	4	+	158270378	158278676	AIDA pseudogene 2 [Source:HGNC Symbol;Acc:HGNC:54664]	transcribed_processed_pseudogene	4.24613	7.24965e-13
ENSG00000163545	NUAK2	1	-	205302063	205321745	NUAK family kinase 2 [Source:HGNC Symbol;Acc:HGNC:29558]	protein_coding	4.22442	0
ENSG00000235888	AF064858.1	21	-	38988569	39062894	novel transcript	lncRNA	4.22235	4.07223e-149
ENSG00000162631	NTNG1	1	+	107140007	107483458	netrin G1 [Source:HGNC Symbol;Acc:HGNC:23319]	protein_coding	4.21454	0
ENSG00000247735	AC120114.1	16	+	29926836	29928933	novel transcript, antisense to KCTD13	lncRNA	4.19435	7.58737e-10
ENSG00000263826	AC112907.3	3	-	186781780	186784179	novel transcript, antisense to eukaryotic translation initiation factor 4A, isoform 2 EIF4A2	lncRNA	4.19081	3.40809e-09
ENSG00000141232	TOB1	17	-	50862223	50867978	transducer of ERBB2, 1 [Source:HGNC Symbol;Acc:HGNC:11979]	protein_coding	4.19074	0
ENSG00000287255	AC007877.1	2	+	40534806	40545781	novel transcript, antisense to SLC8A1	lncRNA	4.18934	1.38732e-06
ENSG00000251537	AC005324.3	17	-	15571491	15651653	novel tripartite motif-containing 16 (TRIM16) and CMT1A duplicated region transcript 1 (CDRT1) protein	protein_coding	4.18435	2.63882e-33
ENSG00000273398	AC017083.3	2	-	68131238	68261230	novel protein	protein_coding	4.17405	2.2926e-06
ENSG00000178568	ERBB4	2	-	211375717	212538841	erb-b2 receptor tyrosine kinase 4 [Source:HGNC Symbol;Acc:HGNC:3432]	protein_coding	4.17142	3.52494e-38
ENSG00000189056	RELN	7	-	103471784	103989658	reelin [Source:HGNC Symbol;Acc:HGNC:9957]	protein_coding	4.1448	1.02472e-163
ENSG00000225778	PROSER2-AS1	10	-	11849608	11894700	PROSER2 antisense RNA 1 [Source:HGNC Symbol;Acc:HGNC:27343]	lncRNA	4.142	5.3785e-12
ENSG00000287621	AC021851.2	2	+	183253652	183495501	novel transcript	lncRNA	4.06688	7.9058e-28
ENSG00000266992	DHX40P1	17	-	59976009	60002384	DEAH-box helicase 40 pseudogene 1 [Source:HGNC Symbol;Acc:HGNC:20687]	transcribed_unprocessed_pseudogene	4.05156	3.81763e-06
ENSG00000204420	MPIG6B	6	+	31718594	31726714	megakaryocyte and platelet inhibitory receptor G6b [Source:HGNC Symbol;Acc:HGNC:13937]	protein_coding	4.04413	8.13095e-11
ENSG00000122877	EGR2	10	-	62811996	62919900	early growth response 2 [Source:HGNC Symbol;Acc:HGNC:3239]	protein_coding	4.01888	3.31814e-90
ENSG00000188039	NWD1	19	+	16719847	16817963	NACHT and WD repeat domain containing 1 [Source:HGNC Symbol;Acc:HGNC:27619]	protein_coding	4.0171	0
ENSG00000285733	AL031315.1	6	-	169419969	169702047	novel protein	protein_coding	3.99708	8.72225e-12
ENSG00000130600	H19	11	-	1995176	2001470	H19 imprinted maternally expressed transcript [Source:HGNC Symbol;Acc:HGNC:4713]	lncRNA	3.97433	0
ENSG00000225556	C2CD4D	1	-	151837819	151840557	C2 calcium dependent domain containing 4D [Source:HGNC Symbol;Acc:HGNC:37210]	protein_coding	3.97384	4.92946e-07
ENSG00000154429	CCSAP	1	-	229321011	229343294	centriole, cilia and spindle associated protein [Source:HGNC Symbol;Acc:HGNC:29578]	protein_coding	3.94425	6.97901e-157
ENSG00000197410	DCHS2	4	-	154231742	154491799	dachsous cadherin-related 2 [Source:HGNC Symbol;Acc:HGNC:23111]	protein_coding	3.94045	4.51708e-31
ENSG00000272508	AL136982.6	10	+	86993432	87024732	novel transcript	lncRNA	3.92877	2.06756e-11
ENSG00000214544	GTF2IRD2P1	7	-	73242751	73280119	GTF2I repeat domain containing 2 pseudogene 1 [Source:HGNC Symbol;Acc:HGNC:33127]	transcribed_unprocessed_pseudogene	3.92094	2.27794e-06
ENSG00000277726	AL109811.3	1	+	11012662	11030528	novel protein	protein_coding	3.91809	1.25395e-08
ENSG00000006047	YBX2	17	-	7288263	7294639	Y-box binding protein 2 [Source:HGNC Symbol;Acc:HGNC:17948]	protein_coding	3.91409	9.68188e-30
ENSG00000124701	APOBEC2	6	+	41053304	41064511	apolipoprotein B mRNA editing enzyme catalytic subunit 2 [Source:HGNC Symbol;Acc:HGNC:605]	protein_coding	3.9035	4.29623e-27
ENSG00000149735	GPHA2	11	-	64934471	64935893	glycoprotein hormone subunit alpha 2 [Source:HGNC Symbol;Acc:HGNC:18054]	protein_coding	3.90108	9.46303e-21
ENSG00000254027	AC009902.2	8	-	81279871	81281446	novel transcript	lncRNA	3.87928	4.43895e-10
ENSG00000145700	ANKRD31	5	-	75068275	75236911	ankyrin repeat domain 31 [Source:HGNC Symbol;Acc:HGNC:26853]	protein_coding	3.8727	1.41175e-14
ENSG00000257125	KRT127P	12	-	52751978	52753821	keratin 127 pseudogene [Source:HGNC Symbol;Acc:HGNC:40019]	unprocessed_pseudogene	3.86742	6.33364e-08
ENSG00000114786	ABHD14A-ACY1	3	+	51974706	51989183	ABHD14A-ACY1 readthrough [Source:HGNC Symbol;Acc:HGNC:38856]	protein_coding	3.84235	1.00583e-74
ENSG00000275894	AL021578.1	20	-	45345115	45345823	novel transcript, sense intronic to SDC4	lncRNA	3.84118	2.79019e-07
ENSG00000236137	AL445231.1	1	-	117025482	117059490	novel transcript	lncRNA	3.83919	2.20323e-06
ENSG00000094796	KRT31	17	-	41393721	41397608	keratin 31 [Source:HGNC Symbol;Acc:HGNC:6448]	protein_coding	3.8287	1.20162e-14
ENSG00000142178	SIK1	21	-	43414483	43427131	salt inducible kinase 1 [Source:HGNC Symbol;Acc:HGNC:11142]	protein_coding	3.82439	1.86944e-42
ENSG00000263809	AC135178.3	17	-	8368638	8383187	novel protein	protein_coding	3.82106	7.17902e-10
ENSG00000214842	RAD51AP2	2	-	17510584	17518439	RAD51 associated protein 2 [Source:HGNC Symbol;Acc:HGNC:34417]	protein_coding	3.8132	5.85757e-22
ENSG00000213144	AC084880.1	12	+	119194850	119195394	PDGFA associated protein 1 (PDAP1) pseudogene	processed_pseudogene	3.8082	1.60311e-12
ENSG00000184371	CSF1	1	+	109910242	109930992	colony stimulating factor 1 [Source:HGNC Symbol;Acc:HGNC:2432]	protein_coding	3.8	4.89485e-14
ENSG00000147231	RADX	X	+	106611930	106679439	RPA1 related single stranded DNA binding protein, X-linked [Source:HGNC Symbol;Acc:HGNC:25486]	protein_coding	3.79707	1.21065e-18
ENSG00000124205	EDN3	20	+	59300443	59325992	endothelin 3 [Source:HGNC Symbol;Acc:HGNC:3178]	protein_coding	3.78882	4.29911e-21
ENSG00000141682	PMAIP1	18	+	59899996	59904305	phorbol-12-myristate-13-acetate-induced protein 1 [Source:HGNC Symbol;Acc:HGNC:9108]	protein_coding	3.77798	0
ENSG00000227733	AC239809.3	1	-	148159213	148255012	novel transcript	lncRNA	3.77693	3.5971e-48
ENSG00000138336	TET1	10	+	68560337	68694487	tet methylcytosine dioxygenase 1 [Source:HGNC Symbol;Acc:HGNC:29484]	protein_coding	3.77397	2.61863e-19
ENSG00000164879	CA3	8	+	85373436	85449040	carbonic anhydrase 3 [Source:HGNC Symbol;Acc:HGNC:1374]	protein_coding	3.77056	1.46758e-59
ENSG00000164080	RAD54L2	3	+	51541144	51668667	RAD54 like 2 [Source:HGNC Symbol;Acc:HGNC:29123]	protein_coding	3.76806	2.07837e-187
ENSG00000226281	AL031123.1	6	-	6692741	6739030	novel transcript	lncRNA	3.73905	9.05495e-35
ENSG00000133800	LYVE1	11	-	10556966	10611689	lymphatic vessel endothelial hyaluronan receptor 1 [Source:HGNC Symbol;Acc:HGNC:14687]	protein_coding	3.71777	0
ENSG00000174482	LINGO2	9	-	27948078	28670286	leucine rich repeat and Ig domain containing 2 [Source:HGNC Symbol;Acc:HGNC:21207]	protein_coding	3.71515	1.50871e-10
ENSG00000138166	DUSP5	10	+	110497907	110511533	dual specificity phosphatase 5 [Source:HGNC Symbol;Acc:HGNC:3071]	protein_coding	3.71208	4.99127e-195
ENSG00000205358	MT1H	16	+	56669814	56671129	metallothionein 1H [Source:HGNC Symbol;Acc:HGNC:7400]	protein_coding	3.70328	2.2926e-06
ENSG00000273055	AC005046.1	7	+	107942116	107942740	novel transcript, antisense to LAMB1	lncRNA	3.70111	1.66793e-09
ENSG00000279342	AP000866.6	11	-	124789240	124792818	novel transcript, sense intronic to MSANTD2	lncRNA	3.69951	9.87505e-09
ENSG00000258590	NBEAP1	15	-	20657638	20688408	neurobeachin pseudogene 1 [Source:HGNC Symbol;Acc:HGNC:1007]	transcribed_unprocessed_pseudogene	3.69825	1.02597e-06
ENSG00000163660	CCNL1	3	-	157146508	157160760	cyclin L1 [Source:HGNC Symbol;Acc:HGNC:20569]	protein_coding	3.68096	0
ENSG00000221949	LINC01465	12	-	62601751	62603690	long intergenic non-protein coding RNA 1465 [Source:HGNC Symbol;Acc:HGNC:26364]	lncRNA	3.67848	1.96336e-11
ENSG00000275719	AC008622.2	19	+	46787815	46789043	novel transcript, antisense to SLC1A5	lncRNA	3.67271	4.67552e-11
ENSG00000154358	OBSCN	1	+	228208063	228378876	obscurin, cytoskeletal calmodulin and titin-interacting RhoGEF [Source:HGNC Symbol;Acc:HGNC:15719]	protein_coding	3.64932	1.63498e-145
ENSG00000168702	LRP1B	2	-	140231423	142131016	LDL receptor related protein 1B [Source:HGNC Symbol;Acc:HGNC:6693]	protein_coding	3.6484	1.71881e-25
ENSG00000237732	CT75	2	+	222318275	222352989	cancer/testis associated transcript 75 [Source:HGNC Symbol;Acc:HGNC:37174]	transcribed_unprocessed_pseudogene	3.61431	1.12256e-08
ENSG00000176927	EFCAB5	17	+	29929200	30108452	EF-hand calcium binding domain 5 [Source:HGNC Symbol;Acc:HGNC:24801]	protein_coding	3.60519	6.57601e-13
ENSG00000254245	PCDHGA3	5	+	141343829	141512975	protocadherin gamma subfamily A, 3 [Source:HGNC Symbol;Acc:HGNC:8701]	protein_coding	3.60077	3.37583e-06
ENSG00000147257	GPC3	X	-	133535745	133985594	glypican 3 [Source:HGNC Symbol;Acc:HGNC:4451]	protein_coding	3.59265	8.40464e-77
ENSG00000128578	STRIP2	7	+	129434432	129488399	striatin interacting protein 2 [Source:HGNC Symbol;Acc:HGNC:22209]	protein_coding	3.59188	2.51661e-162
ENSG00000261804	AC007342.4	16	+	53373479	53385019	novel transcript	lncRNA	3.58752	6.35509e-14
ENSG00000134539	KLRD1	12	+	10226058	10329608	killer cell lectin like receptor D1 [Source:HGNC Symbol;Acc:HGNC:6378]	protein_coding	3.56641	8.02342e-20
ENSG00000214694	ARHGEF33	2	+	38889841	38975449	Rho guanine nucleotide exchange factor 33 [Source:HGNC Symbol;Acc:HGNC:37252]	protein_coding	3.54096	5.73389e-07
ENSG00000205236	AC105052.1	7	-	102582523	102642869	novel protein, UPK3BL-RASA4 readthrough	protein_coding	3.51963	1.66793e-09
ENSG00000283761	AC118553.2	1	+	99970011	100083321	novel protein	protein_coding	3.5191	4.80151e-09
ENSG00000109321	AREG	4	+	74445136	74455005	amphiregulin [Source:HGNC Symbol;Acc:HGNC:651]	protein_coding	3.51678	8.01918e-48
ENSG00000235192	AC009495.3	2	+	165794851	165810010	novel transcript	lncRNA	3.51016	3.28092e-07
ENSG00000236816	ANKRD20A7P	9	+	42830337	42950827	ankyrin repeat domain 20 family member A7, pseudogene [Source:HGNC Symbol;Acc:HGNC:31980]	transcribed_unprocessed_pseudogene	3.49169	1.92227e-09
ENSG00000203867	RBM20	10	+	110644336	110839468	RNA binding motif protein 20 [Source:HGNC Symbol;Acc:HGNC:27424]	protein_coding	3.48774	0
ENSG00000229676	ZNF492	19	+	22634324	22667671	zinc finger protein 492 [Source:HGNC Symbol;Acc:HGNC:23707]	protein_coding	3.4642	3.32194e-08
ENSG00000182676	PPP1R27	17	-	81833492	81835050	protein phosphatase 1 regulatory subunit 27 [Source:HGNC Symbol;Acc:HGNC:16813]	protein_coding	3.46043	1.43024e-10
ENSG00000160182	TFF1	21	-	42362282	42366535	trefoil factor 1 [Source:HGNC Symbol;Acc:HGNC:11755]	protein_coding	3.45414	8.41369e-20
ENSG00000253910	PCDHGB2	5	+	141360042	141512979	protocadherin gamma subfamily B, 2 [Source:HGNC Symbol;Acc:HGNC:8709]	protein_coding	3.44206	3.13179e-15
ENSG00000166828	SCNN1G	16	+	23182745	23216883	sodium channel epithelial 1 subunit gamma [Source:HGNC Symbol;Acc:HGNC:10602]	protein_coding	3.44119	6.91054e-54
ENSG00000102387	TAF7L	X	-	101268253	101293057	TATA-box binding protein associated factor 7 like [Source:HGNC Symbol;Acc:HGNC:11548]	protein_coding	3.43703	1.14942e-06
ENSG00000141582	CBX4	17	-	79833156	79839440	chromobox 4 [Source:HGNC Symbol;Acc:HGNC:1554]	protein_coding	3.42469	1.94709e-266
ENSG00000271079	CTAGE15	7	+	143571801	143574387	CTAGE family member 15 [Source:HGNC Symbol;Acc:HGNC:37295]	protein_coding	3.41804	1.97066e-06
ENSG00000286722	AC009244.2	7	-	129366827	129374486	novel transcript, antisense to AHCYL2	lncRNA	3.40892	2.94724e-40
ENSG00000073067	CYP2W1	7	+	983181	989640	cytochrome P450 family 2 subfamily W member 1 [Source:HGNC Symbol;Acc:HGNC:20243]	protein_coding	3.39919	4.79129e-46
ENSG00000124253	PCK1	20	+	57561080	57568121	phosphoenolpyruvate carboxykinase 1 [Source:HGNC Symbol;Acc:HGNC:8724]	protein_coding	3.39468	1.32147e-24
ENSG00000162761	LMX1A	1	-	165201867	165356715	LIM homeobox transcription factor 1 alpha [Source:HGNC Symbol;Acc:HGNC:6653]	protein_coding	3.39165	4.2059e-07
ENSG00000275216	AL161431.1	13	+	109269634	109278512	novel transcript	lncRNA	3.37279	2.2715e-25
ENSG00000144655	CSRNP1	3	-	39141855	39154562	cysteine and serine rich nuclear protein 1 [Source:HGNC Symbol;Acc:HGNC:14300]	protein_coding	3.36975	1.69942e-231
ENSG00000099860	GADD45B	19	+	2476122	2478259	growth arrest and DNA damage inducible beta [Source:HGNC Symbol;Acc:HGNC:4096]	protein_coding	3.36036	0
ENSG00000198908	BHLHB9	X	+	102720688	102753540	basic helix-loop-helix family member b9 [Source:HGNC Symbol;Acc:HGNC:29353]	protein_coding	3.36031	1.97509e-45
ENSG00000177570	SAMD12	8	-	118189455	118622112	sterile alpha motif domain containing 12 [Source:HGNC Symbol;Acc:HGNC:31750]	protein_coding	3.34763	0
ENSG00000261996	AC004706.1	17	-	6653464	6655009	novel transcript	lncRNA	3.34747	1.01892e-09
ENSG00000196859	KRT39	17	-	40958417	40966948	keratin 39 [Source:HGNC Symbol;Acc:HGNC:32971]	protein_coding	3.34296	2.67787e-22
ENSG00000149043	SYT8	11	+	1828307	1837521	synaptotagmin 8 [Source:HGNC Symbol;Acc:HGNC:19264]	protein_coding	3.33683	0
ENSG00000122194	PLG	6	+	160702238	160754097	plasminogen [Source:HGNC Symbol;Acc:HGNC:9071]	protein_coding	3.32781	1.92681e-28
ENSG00000081377	CDC14B	9	-	96490241	96619843	cell division cycle 14B [Source:HGNC Symbol;Acc:HGNC:1719]	protein_coding	3.30649	0
ENSG00000272411	AC116312.1	5	+	148970340	148970653	novel transcript, antisense to SH3TC2	lncRNA	3.30309	2.18614e-15
ENSG00000111339	ART4	12	-	14825569	14843526	ADP-ribosyltransferase 4 (Dombrock blood group) [Source:HGNC Symbol;Acc:HGNC:726]	protein_coding	3.29958	4.34146e-10
ENSG00000288046	AL031123.5	6	+	6725036	6733191	novel transcript	lncRNA	3.29721	4.1831e-10
ENSG00000275993	SIK1B	21	+	6111131	6123778	salt inducible kinase 1B (putative) [Source:HGNC Symbol;Acc:HGNC:52389]	protein_coding	3.27879	2.80648e-249
ENSG00000066468	FGFR2	10	-	121478332	121598458	fibroblast growth factor receptor 2 [Source:HGNC Symbol;Acc:HGNC:3689]	protein_coding	3.27556	0
ENSG00000230606	AC092683.1	2	-	97416165	97433527	novel transcript	lncRNA	3.26842	2.90011e-11
ENSG00000253159	PCDHGA12	5	+	141430507	141512975	protocadherin gamma subfamily A, 12 [Source:HGNC Symbol;Acc:HGNC:8699]	protein_coding	3.25537	1.29137e-18
ENSG00000264714	KIAA0895LP1	18	+	10724619	10728539	KIAA00895L pseudogene 1 [Source:HGNC Symbol;Acc:HGNC:53865]	transcribed_processed_pseudogene	3.24596	1.11774e-06
ENSG00000188993	LRRC66	4	-	51993702	52017620	leucine rich repeat containing 66 [Source:HGNC Symbol;Acc:HGNC:34299]	protein_coding	3.24584	1.724e-07
ENSG00000196218	RYR1	19	+	38433691	38587564	ryanodine receptor 1 [Source:HGNC Symbol;Acc:HGNC:10483]	protein_coding	3.23868	2.81278e-63
ENSG00000166833	NAV2	11	+	19350724	20121601	neuron navigator 2 [Source:HGNC Symbol;Acc:HGNC:15997]	protein_coding	3.23816	1.20189e-206
ENSG00000279968	CCDC28A-AS1	6	-	138725211	138773652	CCDC28A antisense RNA 1 [Source:HGNC Symbol;Acc:HGNC:51715]	lncRNA	3.23515	2.89774e-09
ENSG00000261079	AC009053.2	16	+	74367462	74369826	novel transcript	lncRNA	3.22971	4.17169e-06
ENSG00000261915	AC026954.2	17	-	7312661	7319174	novel protein	protein_coding	3.22857	3.01735e-08
ENSG00000254750	CASP1P2	11	-	105063345	105071541	caspase 1 pseudogene 2 [Source:HGNC Symbol;Acc:HGNC:43776]	unprocessed_pseudogene	3.22407	2.16729e-06
ENSG00000234290	AC116366.1	5	-	132468890	132473043	novel transcript	lncRNA	3.22122	2.32402e-11
ENSG00000250026	TMPRSS11BNL	4	-	68184081	68218080	TMPRSS11B N-terminal like, pseudogene [Source:HGNC Symbol;Acc:HGNC:37262]	transcribed_unprocessed_pseudogene	3.2212	5.93098e-152
ENSG00000188517	COL25A1	4	-	108808725	109302752	collagen type XXV alpha 1 chain [Source:HGNC Symbol;Acc:HGNC:18603]	protein_coding	3.22006	3.46487e-19
ENSG00000287825	AL035587.2	6	-	42928287	42929457	novel transcript, antisense to CNPY3	lncRNA	3.20126	4.16639e-07
ENSG00000144893	MED12L	3	+	151085697	151437072	mediator complex subunit 12L [Source:HGNC Symbol;Acc:HGNC:16050]	protein_coding	3.19322	1.23808e-16
ENSG00000262481	TMEM256-PLSCR3	17	-	7389734	7404097	TMEM256-PLSCR3 readthrough (NMD candidate) [Source:HGNC Symbol;Acc:HGNC:49186]	protein_coding	3.18802	6.56342e-13
ENSG00000118513	MYB	6	+	135181308	135219173	MYB proto-oncogene, transcription factor [Source:HGNC Symbol;Acc:HGNC:7545]	protein_coding	3.18602	3.66709e-24
ENSG00000168497	CAVIN2	2	-	191834310	191847088	caveolae associated protein 2 [Source:HGNC Symbol;Acc:HGNC:10690]	protein_coding	3.18315	1.51374e-183
ENSG00000197121	PGAP1	2	-	196833004	196927796	post-GPI attachment to proteins inositol deacylase 1 [Source:HGNC Symbol;Acc:HGNC:25712]	protein_coding	3.17521	1.85175e-226
ENSG00000006747	SCIN	7	+	12570577	12660182	scinderin [Source:HGNC Symbol;Acc:HGNC:21695]	protein_coding	3.17076	0
ENSG00000170356	OR2A20P	7	-	144250045	144256244	olfactory receptor family 2 subfamily A member 20 pseudogene [Source:HGNC Symbol;Acc:HGNC:15413]	transcribed_unprocessed_pseudogene	3.16349	9.38625e-08
ENSG00000205307	SAP25	7	-	100572228	100573900	Sin3A associated protein 25 [Source:HGNC Symbol;Acc:HGNC:41908]	protein_coding	3.16176	2.20323e-06
ENSG00000037280	FLT4	5	-	180601506	180649624	fms related receptor tyrosine kinase 4 [Source:HGNC Symbol;Acc:HGNC:3767]	protein_coding	3.15555	3.56941e-82
ENSG00000171931	FBXW10	17	+	18744026	18779349	F-box and WD repeat domain containing 10 [Source:HGNC Symbol;Acc:HGNC:1211]	protein_coding	3.15271	2.15919e-08
ENSG00000227449	FGF7P6	9	+	62376161	62435199	fibroblast growth factor 7 pseudogene 6 [Source:HGNC Symbol;Acc:HGNC:27852]	transcribed_unprocessed_pseudogene	3.14332	4.84421e-16
ENSG00000114315	HES1	3	+	194136148	194138732	hes family bHLH transcription factor 1 [Source:HGNC Symbol;Acc:HGNC:5192]	protein_coding	3.13481	0
ENSG00000178460	MCMDC2	8	+	66870749	66922048	minichromosome maintenance domain containing 2 [Source:HGNC Symbol;Acc:HGNC:26368]	protein_coding	3.12604	1.61098e-08
ENSG00000171121	KCNMB3	3	-	179236691	179267002	potassium calcium-activated channel subfamily M regulatory beta subunit 3 [Source:HGNC Symbol;Acc:HGNC:6287]	protein_coding	3.12397	1.32658e-11
ENSG00000171346	KRT15	17	-	41513745	41522529	keratin 15 [Source:HGNC Symbol;Acc:HGNC:6421]	protein_coding	3.12377	0
ENSG00000169860	P2RY1	3	+	152835131	152841439	purinergic receptor P2Y1 [Source:HGNC Symbol;Acc:HGNC:8539]	protein_coding	3.12136	0
ENSG00000135960	EDAR	2	-	108894471	108989372	ectodysplasin A receptor [Source:HGNC Symbol;Acc:HGNC:2895]	protein_coding	3.12067	1.6215e-56
ENSG00000176597	B3GNT5	3	+	183253253	183298504	UDP-GlcNAc:betaGal beta-1,3-N-acetylglucosaminyltransferase 5 [Source:HGNC Symbol;Acc:HGNC:15684]	protein_coding	3.12007	1.39537e-269
ENSG00000284543	LINC01226	1	+	31506226	31583306	long intergenic non-protein coding RNA 1226 [Source:HGNC Symbol;Acc:HGNC:49678]	lncRNA	3.11523	3.68547e-37
ENSG00000184305	CCSER1	4	+	90127535	91601913	coiled-coil serine rich protein 1 [Source:HGNC Symbol;Acc:HGNC:29349]	protein_coding	3.10869	2.58323e-11
ENSG00000176083	ZNF683	1	-	26361634	26374522	zinc finger protein 683 [Source:HGNC Symbol;Acc:HGNC:28495]	protein_coding	3.10092	7.62277e-15
ENSG00000233052	AL513304.1	10	-	1361001	1361637	novel transcript	lncRNA	3.09249	3.68051e-10
ENSG00000110848	CD69	12	-	9752486	9760901	CD69 molecule [Source:HGNC Symbol;Acc:HGNC:1694]	protein_coding	3.08052	7.11737e-54
ENSG00000238279	BX470102.1	1	+	153533603	153535115	novel transcript	lncRNA	3.07505	8.21569e-22
ENSG00000198670	LPA	6	-	160531482	160664275	lipoprotein(a) [Source:HGNC Symbol;Acc:HGNC:6667]	protein_coding	3.07323	3.23151e-138
ENSG00000108551	RASD1	17	-	17494437	17496395	ras related dexamethasone induced 1 [Source:HGNC Symbol;Acc:HGNC:15828]	protein_coding	3.07265	8.63571e-29
ENSG00000178397	FAM220A	7	-	6329411	6348981	family with sequence similarity 220 member A [Source:HGNC Symbol;Acc:HGNC:22422]	protein_coding	3.06265	1.41436e-20
ENSG00000173867	AC013489.1	15	-	88459501	88546585	novel transcript	protein_coding	3.06235	5.01265e-13
ENSG00000266729	DSG1-AS1	18	-	31343368	31426988	DSG1 antisense RNA 1 [Source:HGNC Symbol;Acc:HGNC:51115]	lncRNA	3.06156	3.24231e-10
ENSG00000285269	AL160269.1	9	-	96235331	96352058	solute carrier family 35 member D2 [Source:NCBI gene (formerly Entrezgene);Acc:11046]	protein_coding	3.05817	2.66577e-24
ENSG00000173320	STOX2	4	+	183797692	184023526	storkhead box 2 [Source:HGNC Symbol;Acc:HGNC:25450]	protein_coding	3.05548	6.97193e-178
ENSG00000124920	MYRF	11	+	61752636	61788518	myelin regulatory factor [Source:HGNC Symbol;Acc:HGNC:1181]	protein_coding	3.05211	1.29105e-69
ENSG00000230387	AL118508.1	20	+	23179272	23190419	novel transcript	lncRNA	3.0478	1.81873e-168
ENSG00000181827	RFX7	15	-	56087280	56245082	regulatory factor X7 [Source:HGNC Symbol;Acc:HGNC:25777]	protein_coding	3.04087	1.0796e-86
ENSG00000238837	LINC02031	3	+	182644214	182655880	long intergenic non-protein coding RNA 2031 [Source:HGNC Symbol;Acc:HGNC:52865]	lncRNA	3.03938	5.70257e-15
ENSG00000250673	REELD1	4	+	146214515	146230878	reeler domain containing 1 [Source:HGNC Symbol;Acc:HGNC:53638]	protein_coding	3.03506	1.11774e-06
ENSG00000182938	OTOP3	17	+	74935898	74949992	otopetrin 3 [Source:HGNC Symbol;Acc:HGNC:19658]	protein_coding	3.03498	1.92589e-23
ENSG00000078900	TP73	1	+	3652516	3736201	tumor protein p73 [Source:HGNC Symbol;Acc:HGNC:12003]	protein_coding	3.02613	1.77447e-212
ENSG00000160870	CYP3A7	7	-	99705036	99735196	cytochrome P450 family 3 subfamily A member 7 [Source:HGNC Symbol;Acc:HGNC:2640]	protein_coding	3.02374	1.10399e-07
ENSG00000267279	AC090409.1	18	-	61585746	61607006	novel transcript	lncRNA	3.01895	2.94568e-11
ENSG00000130821	SLC6A8	X	+	153687926	153696588	solute carrier family 6 member 8 [Source:HGNC Symbol;Acc:HGNC:11055]	protein_coding	3.01462	0
ENSG00000223509	AC135983.3	15	-	32519848	32536926	WAS protein homolog associated with actin, golgi membranes and microtubules (WHAMM) pseudogene	transcribed_processed_pseudogene	3.00935	2.10447e-14
ENSG00000271723	MROH7-TTC4	1	+	54641786	54742308	MROH7-TTC4 readthrough (NMD candidate) [Source:HGNC Symbol;Acc:HGNC:49180]	protein_coding	3.00908	1.82531e-30
ENSG00000228175	GEMIN8P4	1	-	89993593	89994321	gem nuclear organelle associated protein 8 pseudogene 4 [Source:HGNC Symbol;Acc:HGNC:37979]	processed_pseudogene	3.00562	5.22363e-07
ENSG00000164379	FOXQ1	6	+	1312098	1314758	forkhead box Q1 [Source:HGNC Symbol;Acc:HGNC:20951]	protein_coding	3.00273	1.51609e-265
ENSG00000119698	PPP4R4	14	+	94146128	94279734	protein phosphatase 4 regulatory subunit 4 [Source:HGNC Symbol;Acc:HGNC:23788]	protein_coding	2.99622	1.56195e-72
ENSG00000265590	CFAP298-TCP10L	21	-	32402511	32612865	CFAP298-TCP10L readthrough [Source:HGNC Symbol;Acc:HGNC:54636]	protein_coding	2.99603	3.3232e-35
ENSG00000228835	AC012123.1	18	+	32769795	32774413	novel transcript, antisense to KLHL14	lncRNA	2.99453	1.65566e-10
ENSG00000165816	VWA2	10	+	114239254	114294489	von Willebrand factor A domain containing 2 [Source:HGNC Symbol;Acc:HGNC:24709]	protein_coding	2.99292	7.14575e-96
ENSG00000184517	ZFP1	16	+	75148494	75172236	ZFP1 zinc finger protein [Source:HGNC Symbol;Acc:HGNC:23328]	protein_coding	2.99213	1.07528e-144
ENSG00000143434	SEMA6C	1	-	151131685	151146664	semaphorin 6C [Source:HGNC Symbol;Acc:HGNC:10740]	protein_coding	2.98942	5.38301e-63
ENSG00000232040	ZBED9	6	-	28570535	28616212	zinc finger BED-type containing 9 [Source:HGNC Symbol;Acc:HGNC:13851]	protein_coding	2.98039	1.83492e-18
ENSG00000233892	PAIP1P1	6	-	30186798	30188614	poly(A) binding protein interacting protein 1 pseudogene 1 [Source:HGNC Symbol;Acc:HGNC:18240]	processed_pseudogene	2.97962	2.3425e-06
ENSG00000103460	TOX3	16	-	52436417	52547802	TOX high mobility group box family member 3 [Source:HGNC Symbol;Acc:HGNC:11972]	protein_coding	2.97357	1.69171e-07
ENSG00000183579	ZNRF3	22	+	28883572	29057488	zinc and ring finger 3 [Source:HGNC Symbol;Acc:HGNC:18126]	protein_coding	2.96762	8.15623e-77
ENSG00000227617	CERS6-AS1	2	-	168771951	168786961	CERS6 antisense RNA 1 [Source:HGNC Symbol;Acc:HGNC:44485]	lncRNA	2.96096	7.34737e-13
ENSG00000197714	ZNF460	19	+	57280051	57294069	zinc finger protein 460 [Source:HGNC Symbol;Acc:HGNC:21628]	protein_coding	2.95719	1.34437e-17
ENSG00000213599	SLX1A-SULT1A3	16	+	30193892	30204310	SLX1A-SULT1A3 readthrough (NMD candidate) [Source:HGNC Symbol;Acc:HGNC:44437]	lncRNA	2.95186	4.20794e-13
ENSG00000146858	ZC3HAV1L	7	-	139025706	139036042	zinc finger CCCH-type containing, antiviral 1 like [Source:HGNC Symbol;Acc:HGNC:22423]	protein_coding	2.92199	3.84981e-08
ENSG00000215302	AC127502.1	15	+	30470779	30507623	WAS protein homolog associated with actin, golgi membranes and microtubules (WHAMM) pseudogene	transcribed_unprocessed_pseudogene	2.92191	1.32579e-10
ENSG00000253875	AC013643.2	8	+	27732915	27758552	novel transcript	lncRNA	2.91792	4.30561e-10
ENSG00000134569	LRP4	11	-	46856717	46918642	LDL receptor related protein 4 [Source:HGNC Symbol;Acc:HGNC:6696]	protein_coding	2.91648	1.149e-290
ENSG00000224086	PPM1F-AS1	22	+	21938269	21977632	PPM1F antisense RNA 1 [Source:HGNC Symbol;Acc:HGNC:40888]	lncRNA	2.91539	3.26607e-22
ENSG00000281183	NPTN-IT1	15	-	73567012	73569294	NPTN intronic transcript 1 [Source:HGNC Symbol;Acc:HGNC:45091]	lncRNA	2.91175	1.91454e-10
ENSG00000198205	ZXDA	X	-	57906708	57910820	zinc finger X-linked duplicated A [Source:HGNC Symbol;Acc:HGNC:13198]	protein_coding	2.91009	6.97005e-28
ENSG00000111879	FAM184A	6	-	118959763	119149387	family with sequence similarity 184 member A [Source:HGNC Symbol;Acc:HGNC:20991]	protein_coding	2.90053	3.46682e-35
ENSG00000168772	CXXC4	4	-	104468308	104494901	CXXC finger protein 4 [Source:HGNC Symbol;Acc:HGNC:24593]	protein_coding	2.89586	2.61951e-16
ENSG00000140459	CYP11A1	15	-	74337759	74367646	cytochrome P450 family 11 subfamily A member 1 [Source:HGNC Symbol;Acc:HGNC:2590]	protein_coding	2.8944	2.27369e-11
ENSG00000262619	LINC00621	13	-	22859050	22916369	long intergenic non-protein coding RNA 621 [Source:HGNC Symbol;Acc:HGNC:44227]	lncRNA	2.88754	2.17749e-11
ENSG00000253133	AC009630.1	8	-	41509593	41578421	novel transcript, antisense to AGPAT6 and GINS4	lncRNA	2.87115	8.76372e-22
ENSG00000147160	AWAT2	X	-	70040542	70049938	acyl-CoA wax alcohol acyltransferase 2 [Source:HGNC Symbol;Acc:HGNC:23251]	protein_coding	2.86631	1.53462e-09
ENSG00000160223	ICOSLG	21	-	44217014	44240966	inducible T cell costimulator ligand [Source:HGNC Symbol;Acc:HGNC:17087]	protein_coding	2.86541	5.08707e-48
ENSG00000203876	ADD3-AS1	10	-	109940104	110008381	ADD3 antisense RNA 1 [Source:HGNC Symbol;Acc:HGNC:48682]	lncRNA	2.8643	1.27541e-09
ENSG00000245522	LINC02709	11	-	9754770	9759533	long intergenic non-protein coding RNA 2709 [Source:HGNC Symbol;Acc:HGNC:54226]	lncRNA	2.86083	2.28504e-07
ENSG00000213906	LTB4R2	14	+	24305734	24312053	leukotriene B4 receptor 2 [Source:HGNC Symbol;Acc:HGNC:19260]	protein_coding	2.8545	2.15989e-107
ENSG00000042980	ADAM28	8	+	24294069	24359014	ADAM metallopeptidase domain 28 [Source:HGNC Symbol;Acc:HGNC:206]	protein_coding	2.85011	1.89465e-132
ENSG00000178919	FOXE1	9	+	97853226	97856717	forkhead box E1 [Source:HGNC Symbol;Acc:HGNC:3806]	protein_coding	2.84471	6.46227e-26
ENSG00000196581	AJAP1	1	+	4654609	4792534	adherens junctions associated protein 1 [Source:HGNC Symbol;Acc:HGNC:30801]	protein_coding	2.8308	2.27928e-78
ENSG00000091157	WDR7	18	+	56651343	57036606	WD repeat domain 7 [Source:HGNC Symbol;Acc:HGNC:13490]	protein_coding	2.82352	6.01926e-19
ENSG00000255480	AL353699.1	11	+	30425552	30429268	novel transcript	lncRNA	2.81784	4.20794e-13
ENSG00000276509	AC239799.1	1	+	146235806	146237807	novel transcript	lncRNA	2.81392	1.02666e-06
ENSG00000115607	IL18RAP	2	+	102418689	102452565	interleukin 18 receptor accessory protein [Source:HGNC Symbol;Acc:HGNC:5989]	protein_coding	2.81115	7.55705e-15
ENSG00000155980	KIF5A	12	+	57546026	57586633	kinesin family member 5A [Source:HGNC Symbol;Acc:HGNC:6323]	protein_coding	2.81086	7.28423e-09
ENSG00000159450	TCHH	1	-	152106317	152115454	trichohyalin [Source:HGNC Symbol;Acc:HGNC:11791]	protein_coding	2.80657	9.94897e-15
ENSG00000269069	AC007842.1	19	-	40023384	40025502	protein associated with topoisomerase II homolog 1 (yeast) (PATL1) pseudogene	processed_pseudogene	2.8035	4.1189e-06
ENSG00000173376	NDNF	4	-	121035613	121073021	neuron derived neurotrophic factor [Source:HGNC Symbol;Acc:HGNC:26256]	protein_coding	2.7954	4.77473e-149
ENSG00000167165	UGT1A6	2	+	233691607	233773300	UDP glucuronosyltransferase family 1 member A6 [Source:HGNC Symbol;Acc:HGNC:12538]	protein_coding	2.79518	2.62446e-106
ENSG00000142233	NTN5	19	-	48661407	48673081	netrin 5 [Source:HGNC Symbol;Acc:HGNC:25208]	protein_coding	2.79208	1.00637e-10
ENSG00000215018	COL28A1	7	-	7356203	7535873	collagen type XXVIII alpha 1 chain [Source:HGNC Symbol;Acc:HGNC:22442]	protein_coding	2.78992	2.50361e-79
ENSG00000231345	BEND3P1	10	+	50655967	50660472	BEN domain containing 3 pseudogene 1 [Source:HGNC Symbol;Acc:HGNC:45014]	transcribed_processed_pseudogene	2.78795	2.79019e-07
ENSG00000164920	OSR2	8	+	98944403	98952104	odd-skipped related transciption factor 2 [Source:HGNC Symbol;Acc:HGNC:15830]	protein_coding	2.78704	0
ENSG00000270872	SRGAP2D	1	+	143975087	144068350	SLIT-ROBO Rho GTPase activating protein 2D (pseudogene) [Source:HGNC Symbol;Acc:HGNC:43932]	unprocessed_pseudogene	2.77818	3.71538e-08
ENSG00000196616	ADH1B	4	-	99304971	99352760	alcohol dehydrogenase 1B (class I), beta polypeptide [Source:HGNC Symbol;Acc:HGNC:250]	protein_coding	2.77248	2.53152e-135
ENSG00000271327	AC010201.2	12	+	89367807	89369301	novel transcript	lncRNA	2.77231	1.67698e-08
ENSG00000169252	ADRB2	5	+	148825245	148828687	adrenoceptor beta 2 [Source:HGNC Symbol;Acc:HGNC:286]	protein_coding	2.76936	0
ENSG00000286001	AC021087.5	5	+	218298	314955	novel protein	protein_coding	2.76877	9.6118e-10
ENSG00000128050	PAICS	4	+	56435741	56464578	phosphoribosylaminoimidazole carboxylase and phosphoribosylaminoimidazolesuccinocarboxamide synthase [Source:HGNC Symbol;Acc:HGNC:8587]	protein_coding	2.76757	1.80317e-50
ENSG00000030419	IKZF2	2	-	212999691	213152427	IKAROS family zinc finger 2 [Source:HGNC Symbol;Acc:HGNC:13177]	protein_coding	2.76552	0
ENSG00000233610	LINC00462	13	-	48576974	48578088	long intergenic non-protein coding RNA 462 [Source:HGNC Symbol;Acc:HGNC:42811]	lncRNA	2.76285	7.28335e-09
ENSG00000259429	UBE2Q2P2	15	+	82355142	82420075	ubiquitin conjugating enzyme E2 Q2 pseudogene 2 [Source:HGNC Symbol;Acc:HGNC:37440]	transcribed_unprocessed_pseudogene	2.75921	2.75394e-16
ENSG00000134107	BHLHE40	3	+	4979437	4985323	basic helix-loop-helix family member e40 [Source:HGNC Symbol;Acc:HGNC:1046]	protein_coding	2.74895	0
ENSG00000168481	LGI3	8	-	22146830	22157084	leucine rich repeat LGI family member 3 [Source:HGNC Symbol;Acc:HGNC:18711]	protein_coding	2.74836	5.80676e-12
ENSG00000204241	LINC02731	11	+	134032216	134067936	long intergenic non-protein coding RNA 2731 [Source:HGNC Symbol;Acc:HGNC:54248]	lncRNA	2.73694	3.08322e-06
ENSG00000232079	LINC01697	21	+	28048404	28137611	long intergenic non-protein coding RNA 1697 [Source:HGNC Symbol;Acc:HGNC:52485]	lncRNA	2.73213	3.11222e-22
ENSG00000257315	ZBED6	1	+	203795714	203854999	zinc finger BED-type containing 6 [Source:HGNC Symbol;Acc:HGNC:33273]	protein_coding	2.71811	8.04762e-266
ENSG00000204889	KRT40	17	-	40977716	40987135	keratin 40 [Source:HGNC Symbol;Acc:HGNC:26707]	protein_coding	2.71738	9.66199e-69
ENSG00000198435	NRARP	9	-	137299631	137302271	NOTCH regulated ankyrin repeat protein [Source:HGNC Symbol;Acc:HGNC:33843]	protein_coding	2.71362	0
ENSG00000128040	SPINK2	4	-	56809860	56821742	serine peptidase inhibitor Kazal type 2 [Source:HGNC Symbol;Acc:HGNC:11245]	protein_coding	2.70764	2.1498e-11
ENSG00000124939	SCGB2A1	11	+	62208673	62213943	secretoglobin family 2A member 1 [Source:HGNC Symbol;Acc:HGNC:7051]	protein_coding	2.7066	2.32844e-61
ENSG00000261423	TMEM202-AS1	15	-	72407778	72475168	TMEM202 antisense RNA 1 [Source:HGNC Symbol;Acc:HGNC:53265]	lncRNA	2.70606	3.96033e-06
ENSG00000184368	MAP7D2	X	-	20006713	20116907	MAP7 domain containing 2 [Source:HGNC Symbol;Acc:HGNC:25899]	protein_coding	2.70573	5.01265e-13
ENSG00000171517	LPAR3	1	-	84811602	84893206	lysophosphatidic acid receptor 3 [Source:HGNC Symbol;Acc:HGNC:14298]	protein_coding	2.70511	7.83237e-138
ENSG00000229732	AC019349.1	17	+	41500983	41502409	novel transcript	lncRNA	2.69462	2.65974e-96
ENSG00000239704	CDRT4	17	-	15436015	15503608	CMT1A duplicated region transcript 4 [Source:HGNC Symbol;Acc:HGNC:14383]	protein_coding	2.69349	7.76501e-94
ENSG00000119737	GPR75	2	-	53852912	53859967	G protein-coupled receptor 75 [Source:HGNC Symbol;Acc:HGNC:4526]	protein_coding	2.69003	1.32215e-06
ENSG00000237296	SMG1P1	16	+	22437008	22492220	SMG1 pseudogene 1 [Source:HGNC Symbol;Acc:HGNC:44186]	transcribed_unprocessed_pseudogene	2.68733	1.9723e-15
ENSG00000231119	AL031666.1	20	+	47352561	47354633	novel transcript, antisense to ZMYND8	lncRNA	2.68733	6.58074e-07
ENSG00000184454	NCMAP	1	+	24556087	24609328	non-compact myelin associated protein [Source:HGNC Symbol;Acc:HGNC:29332]	protein_coding	2.68499	3.61554e-11
ENSG00000271741	AC114490.2	1	-	34981533	35031741	novel transcript, ZMYM6-ZMYM6NB readthrough	protein_coding	2.68349	5.43451e-24
ENSG00000102908	NFAT5	16	+	69565094	69704666	nuclear factor of activated T cells 5 [Source:HGNC Symbol;Acc:HGNC:7774]	protein_coding	2.6821	1.04316e-295
ENSG00000149531	FRG1BP	20	+	30377372	30399257	FSHD region gene 1 family member B, pseudogene [Source:HGNC Symbol;Acc:HGNC:15792]	unprocessed_pseudogene	2.68161	6.38097e-11
ENSG00000172367	PDZD3	11	+	119185457	119190223	PDZ domain containing 3 [Source:HGNC Symbol;Acc:HGNC:19891]	protein_coding	2.67879	1.19057e-14
ENSG00000234685	NUS1P2	13	+	22915651	22916523	NUS1 pseudogene 2 [Source:HGNC Symbol;Acc:HGNC:38473]	processed_pseudogene	2.67857	5.05339e-10
ENSG00000124159	MATN4	20	-	45293445	45308529	matrilin 4 [Source:HGNC Symbol;Acc:HGNC:6910]	protein_coding	2.67609	1.88759e-07
ENSG00000181690	PLAG1	8	-	56160909	56211324	PLAG1 zinc finger [Source:HGNC Symbol;Acc:HGNC:9045]	protein_coding	2.67163	1.55766e-35
ENSG00000186529	CYP4F3	19	+	15640897	15662825	cytochrome P450 family 4 subfamily F member 3 [Source:HGNC Symbol;Acc:HGNC:2646]	protein_coding	2.6708	2.07233e-19
ENSG00000171401	KRT13	17	-	41500981	41505705	keratin 13 [Source:HGNC Symbol;Acc:HGNC:6415]	protein_coding	2.66653	0
ENSG00000225431	LINC01671	21	-	42599280	42615058	long intergenic non-protein coding RNA 1671 [Source:HGNC Symbol;Acc:HGNC:52459]	lncRNA	2.66567	6.12137e-07
ENSG00000130595	TNNT3	11	+	1919703	1938706	troponin T3, fast skeletal type [Source:HGNC Symbol;Acc:HGNC:11950]	protein_coding	2.66494	0
ENSG00000165621	OXGR1	13	-	96985719	96994730	oxoglutarate receptor 1 [Source:HGNC Symbol;Acc:HGNC:4531]	protein_coding	2.662	2.96386e-29
ENSG00000112182	BACH2	6	-	89926528	90296908	BTB domain and CNC homolog 2 [Source:HGNC Symbol;Acc:HGNC:14078]	protein_coding	2.66199	5.93263e-21
ENSG00000267365	KCNJ2-AS1	17	-	70166961	70169402	KCNJ2 antisense RNA 1 [Source:HGNC Symbol;Acc:HGNC:43720]	lncRNA	2.65329	4.78992e-13
ENSG00000150625	GPM6A	4	-	175632934	176002664	glycoprotein M6A [Source:HGNC Symbol;Acc:HGNC:4460]	protein_coding	2.65226	4.11626e-33
ENSG00000106829	TLE4	9	+	79571773	79726882	TLE family member 4, transcriptional corepressor [Source:HGNC Symbol;Acc:HGNC:11840]	protein_coding	2.65171	2.26042e-239
ENSG00000129167	TPH1	11	-	18017564	18042426	tryptophan hydroxylase 1 [Source:HGNC Symbol;Acc:HGNC:12008]	protein_coding	2.64718	1.32143e-07
ENSG00000100784	RPS6KA5	14	-	90847861	91060641	ribosomal protein S6 kinase A5 [Source:HGNC Symbol;Acc:HGNC:10434]	protein_coding	2.63636	1.15749e-68
ENSG00000018625	ATP1A2	1	+	160115759	160143591	ATPase Na+/K+ transporting subunit alpha 2 [Source:HGNC Symbol;Acc:HGNC:800]	protein_coding	2.63476	2.16125e-75
ENSG00000101447	FAM83D	20	+	38926312	38953106	family with sequence similarity 83 member D [Source:HGNC Symbol;Acc:HGNC:16122]	protein_coding	2.63167	2.76561e-36
ENSG00000115902	SLC1A4	2	+	64988477	65023865	solute carrier family 1 member 4 [Source:HGNC Symbol;Acc:HGNC:10942]	protein_coding	2.63156	4.66364e-294
ENSG00000165646	SLC18A2	10	+	117241093	117279430	solute carrier family 18 member A2 [Source:HGNC Symbol;Acc:HGNC:10935]	protein_coding	2.62708	1.76574e-08
ENSG00000119866	BCL11A	2	-	60450520	60554467	BAF chromatin remodeling complex subunit BCL11A [Source:HGNC Symbol;Acc:HGNC:13221]	protein_coding	2.62104	4.37744e-269
ENSG00000162757	C1orf74	1	-	209779208	209784559	chromosome 1 open reading frame 74 [Source:HGNC Symbol;Acc:HGNC:26319]	protein_coding	2.61444	1.92213e-88
ENSG00000100346	CACNA1I	22	+	39570753	39689735	calcium voltage-gated channel subunit alpha1 I [Source:HGNC Symbol;Acc:HGNC:1396]	protein_coding	2.61354	3.47626e-13
ENSG00000268601	AC115522.1	19	-	43794309	43795658	novel transcript	lncRNA	2.60182	6.42579e-08
ENSG00000163659	TIPARP	3	+	156673235	156706770	TCDD inducible poly(ADP-ribose) polymerase [Source:HGNC Symbol;Acc:HGNC:23696]	protein_coding	2.6008	0
ENSG00000258365	AC073655.2	12	-	94277758	94282844	novel transcript, antisense to PLXNC1	lncRNA	2.59549	8.38588e-07
ENSG00000180871	CXCR2	2	+	218125289	218137251	C-X-C motif chemokine receptor 2 [Source:HGNC Symbol;Acc:HGNC:6027]	protein_coding	2.58736	2.96625e-54
ENSG00000115255	REEP6	19	+	1491166	1497927	receptor accessory protein 6 [Source:HGNC Symbol;Acc:HGNC:30078]	protein_coding	2.58637	1.27006e-68
ENSG00000170962	PDGFD	11	-	103907189	104164379	platelet derived growth factor D [Source:HGNC Symbol;Acc:HGNC:30620]	protein_coding	2.58532	0
ENSG00000105855	ITGB8	7	+	20330702	20415754	integrin subunit beta 8 [Source:HGNC Symbol;Acc:HGNC:6163]	protein_coding	2.58354	3.25768e-18
ENSG00000261324	AC010168.2	12	-	14762504	14767931	novel transcript, overlapping HIST4H4	lncRNA	2.58219	7.48517e-51
ENSG00000158458	NRG2	5	-	139846779	140043299	neuregulin 2 [Source:HGNC Symbol;Acc:HGNC:7998]	protein_coding	2.58018	8.0523e-32
ENSG00000242588	AC108010.1	7	+	128574751	128626473	novel transcript	lncRNA	2.57834	5.32025e-11
ENSG00000179094	PER1	17	-	8140472	8156506	period circadian regulator 1 [Source:HGNC Symbol;Acc:HGNC:8845]	protein_coding	2.5771	1.06624e-19
ENSG00000108813	DLX4	17	+	49968970	49974959	distal-less homeobox 4 [Source:HGNC Symbol;Acc:HGNC:2917]	protein_coding	2.57521	7.49787e-13
ENSG00000273213	H3-2	1	-	143894544	143905966	H3.2 histone (putative) [Source:HGNC Symbol;Acc:HGNC:32060]	protein_coding	2.57094	3.46577e-15
ENSG00000197978	GOLGA6L9	15	+	82430018	82439153	golgin A6 family like 9 [Source:HGNC Symbol;Acc:HGNC:37229]	protein_coding	2.56705	4.07291e-90
ENSG00000159239	AC005041.1	2	-	74393836	74421662	novel protein	protein_coding	2.56482	7.10027e-24
ENSG00000139946	PELI2	14	+	56117814	56301524	pellino E3 ubiquitin protein ligase family member 2 [Source:HGNC Symbol;Acc:HGNC:8828]	protein_coding	2.55975	1.15135e-116
ENSG00000197837	H4-16	12	-	14767999	14771131	H4 histone 16 [Source:HGNC Symbol;Acc:HGNC:20510]	protein_coding	2.55533	2.19434e-09
ENSG00000152785	BMP3	4	+	81030708	81057632	bone morphogenetic protein 3 [Source:HGNC Symbol;Acc:HGNC:1070]	protein_coding	2.54747	0
ENSG00000044524	EPHA3	3	+	89107621	89482134	EPH receptor A3 [Source:HGNC Symbol;Acc:HGNC:3387]	protein_coding	2.54667	1.14978e-38
ENSG00000150045	KLRF1	12	+	9827481	9845007	killer cell lectin like receptor F1 [Source:HGNC Symbol;Acc:HGNC:13342]	protein_coding	2.5451	4.69403e-11
ENSG00000114200	BCHE	3	-	165772904	165837462	butyrylcholinesterase [Source:HGNC Symbol;Acc:HGNC:983]	protein_coding	2.5442	6.17469e-46
ENSG00000087085	ACHE	7	-	100889994	100896974	acetylcholinesterase (Cartwright blood group) [Source:HGNC Symbol;Acc:HGNC:108]	protein_coding	2.54323	8.3224e-14
ENSG00000019549	SNAI2	8	-	48917598	48921740	snail family transcriptional repressor 2 [Source:HGNC Symbol;Acc:HGNC:11094]	protein_coding	2.53958	0
ENSG00000136011	STAB2	12	+	103587273	103766719	stabilin 2 [Source:HGNC Symbol;Acc:HGNC:18629]	protein_coding	2.53894	9.06711e-09
ENSG00000285417	BX571818.1	1	+	206035253	206062257	novel pseudogene	transcribed_unitary_pseudogene	2.53475	7.49766e-07
ENSG00000185046	ANKS1B	12	-	98726457	99984654	ankyrin repeat and sterile alpha motif domain containing 1B [Source:HGNC Symbol;Acc:HGNC:24600]	protein_coding	2.53226	6.2444e-23
ENSG00000147465	STAR	8	-	38142700	38150992	steroidogenic acute regulatory protein [Source:HGNC Symbol;Acc:HGNC:11359]	protein_coding	2.52966	8.6614e-12
ENSG00000129194	SOX15	17	-	7588178	7590094	SRY-box transcription factor 15 [Source:HGNC Symbol;Acc:HGNC:11196]	protein_coding	2.52685	7.83105e-158
ENSG00000138722	MMRN1	4	+	89879532	89954629	multimerin 1 [Source:HGNC Symbol;Acc:HGNC:7178]	protein_coding	2.52066	0
ENSG00000175592	FOSL1	11	-	65892049	65900573	FOS like 1, AP-1 transcription factor subunit [Source:HGNC Symbol;Acc:HGNC:13718]	protein_coding	2.51828	2.3304e-10
ENSG00000105825	TFPI2	7	-	93885396	93890753	tissue factor pathway inhibitor 2 [Source:HGNC Symbol;Acc:HGNC:11761]	protein_coding	2.517	1.23661e-155
ENSG00000233836	AC139769.1	19	+	23762944	23833314	zinc finger protein 726 pseudogene 1	transcribed_unprocessed_pseudogene	2.51375	2.62066e-44
ENSG00000095596	CYP26A1	10	+	93073475	93077885	cytochrome P450 family 26 subfamily A member 1 [Source:HGNC Symbol;Acc:HGNC:2603]	protein_coding	2.51344	1.7212e-48
ENSG00000196337	CGB7	19	-	49054275	49058860	chorionic gonadotropin subunit beta 7 [Source:HGNC Symbol;Acc:HGNC:16451]	protein_coding	2.51205	1.56429e-08
ENSG00000149596	JPH2	20	-	44106590	44187188	junctophilin 2 [Source:HGNC Symbol;Acc:HGNC:14202]	protein_coding	2.50923	7.28013e-35
ENSG00000224905	AP001347.1	21	+	14027419	14144468	novel transcript, antisense to LIPI	lncRNA	2.50858	8.27857e-12
ENSG00000174697	LEP	7	+	128241278	128257629	leptin [Source:HGNC Symbol;Acc:HGNC:6553]	protein_coding	2.50664	2.92376e-59
ENSG00000113070	HBEGF	5	-	140332843	140346603	heparin binding EGF like growth factor [Source:HGNC Symbol;Acc:HGNC:3059]	protein_coding	2.50493	1.49882e-30
ENSG00000171243	SOSTDC1	7	-	16461481	16530580	sclerostin domain containing 1 [Source:HGNC Symbol;Acc:HGNC:21748]	protein_coding	2.50246	3.31108e-14
ENSG00000164171	ITGA2	5	+	52989340	53094779	integrin subunit alpha 2 [Source:HGNC Symbol;Acc:HGNC:6137]	protein_coding	2.5017	0
ENSG00000229267	SNHG31	2	+	214810181	214963575	small nucleolar RNA host gene 31 [Source:HGNC Symbol;Acc:HGNC:54196]	lncRNA	2.50105	1.01225e-49
ENSG00000286389	AL731702.1	1	+	227786753	227792179	novel transcript	lncRNA	2.49483	1.68746e-08
ENSG00000266086	AC015813.2	17	-	57989038	58007246	novel transcript	protein_coding	2.4938	5.35119e-37
ENSG00000103599	IQCH	15	+	67254786	67502260	IQ motif containing H [Source:HGNC Symbol;Acc:HGNC:25721]	protein_coding	2.48792	1.62981e-06
ENSG00000144452	ABCA12	2	-	214931542	215138626	ATP binding cassette subfamily A member 12 [Source:HGNC Symbol;Acc:HGNC:14637]	protein_coding	2.48652	1.84502e-171
ENSG00000078018	MAP2	2	+	209424058	209734118	microtubule associated protein 2 [Source:HGNC Symbol;Acc:HGNC:6839]	protein_coding	2.48642	1.79788e-39
ENSG00000136546	SCN7A	2	-	166403573	166611482	sodium voltage-gated channel alpha subunit 7 [Source:HGNC Symbol;Acc:HGNC:10594]	protein_coding	2.48508	2.08896e-18
ENSG00000119946	CNNM1	10	+	99329356	99394330	cyclin and CBS domain divalent metal cation transport mediator 1 [Source:HGNC Symbol;Acc:HGNC:102]	protein_coding	2.4803	4.54807e-08
ENSG00000157653	C9orf43	9	+	113410054	113429690	chromosome 9 open reading frame 43 [Source:HGNC Symbol;Acc:HGNC:23570]	protein_coding	2.46303	1.04321e-06
ENSG00000102554	KLF5	13	+	73054976	73077541	Kruppel like factor 5 [Source:HGNC Symbol;Acc:HGNC:6349]	protein_coding	2.46067	0
ENSG00000286219	NOTCH2NLC	1	+	149390614	149468030	notch 2 N-terminal like C [Source:HGNC Symbol;Acc:HGNC:53924]	protein_coding	2.4539	3.01544e-07
ENSG00000232977	LINC00327	13	+	23465776	23487712	long intergenic non-protein coding RNA 327 [Source:HGNC Symbol;Acc:HGNC:42009]	lncRNA	2.45282	8.65702e-22
ENSG00000148400	NOTCH1	9	-	136494433	136546048	notch receptor 1 [Source:HGNC Symbol;Acc:HGNC:7881]	protein_coding	2.4518	0
ENSG00000132205	EMILIN2	18	+	2847006	2916003	elastin microfibril interfacer 2 [Source:HGNC Symbol;Acc:HGNC:19881]	protein_coding	2.44798	3.67319e-273
ENSG00000233056	ERVH48-1	21	-	42916803	42925646	endogenous retrovirus group 48 member 1 [Source:HGNC Symbol;Acc:HGNC:17216]	lncRNA	2.44721	1.00797e-09
ENSG00000090447	TFAP4	16	-	4257186	4273075	transcription factor AP-4 [Source:HGNC Symbol;Acc:HGNC:11745]	protein_coding	2.44451	2.03646e-25
ENSG00000108219	TSPAN14	10	+	80454166	80533124	tetraspanin 14 [Source:HGNC Symbol;Acc:HGNC:23303]	protein_coding	2.44253	0
ENSG00000196167	COLCA1	11	-	111290787	111305498	colorectal cancer associated 1 [Source:HGNC Symbol;Acc:HGNC:33789]	lncRNA	2.44105	3.84334e-102
ENSG00000250299	MRPS31P4	13	+	52600119	52637446	mitochondrial ribosomal protein S31 pseudogene 4 [Source:HGNC Symbol;Acc:HGNC:42649]	transcribed_unprocessed_pseudogene	2.43805	1.74183e-07
ENSG00000183273	CCDC60	12	+	119334712	119541040	coiled-coil domain containing 60 [Source:HGNC Symbol;Acc:HGNC:28610]	protein_coding	2.43681	3.47427e-50
ENSG00000089057	SLC23A2	20	-	4852356	5010293	solute carrier family 23 member 2 [Source:HGNC Symbol;Acc:HGNC:10973]	protein_coding	2.43281	0
ENSG00000257176	AC009318.1	12	-	29277955	29317848	novel transcript, antisense to FAR2	lncRNA	2.43119	2.14967e-29
ENSG00000147100	SLC16A2	X	+	74421493	74533917	solute carrier family 16 member 2 [Source:HGNC Symbol;Acc:HGNC:10923]	protein_coding	2.42958	3.82806e-201
ENSG00000163435	ELF3	1	+	202007945	202017183	E74 like ETS transcription factor 3 [Source:HGNC Symbol;Acc:HGNC:3318]	protein_coding	2.4283	0
ENSG00000179104	TMTC2	12	+	82686880	83134870	transmembrane O-mannosyltransferase targeting cadherins 2 [Source:HGNC Symbol;Acc:HGNC:25440]	protein_coding	2.42589	1.06717e-117
ENSG00000182308	DCAF4L1	4	+	41981756	41986465	DDB1 and CUL4 associated factor 4 like 1 [Source:HGNC Symbol;Acc:HGNC:27723]	protein_coding	2.42414	2.54923e-08
ENSG00000242288	BMS1P4-AGAP5	10	-	73674295	73730466	BMS1P4-AGAP5 readthough [Source:NCBI gene (formerly Entrezgene);Acc:113939925]	lncRNA	2.42272	4.36384e-13
ENSG00000106714	CNTNAP3	9	-	39072767	39288315	contactin associated protein family member 3 [Source:HGNC Symbol;Acc:HGNC:13834]	protein_coding	2.41927	1.04832e-119
ENSG00000178401	DNAJC22	12	+	49346888	49357546	DnaJ heat shock protein family (Hsp40) member C22 [Source:HGNC Symbol;Acc:HGNC:25802]	protein_coding	2.41611	3.52368e-36
ENSG00000235194	PPP1R3E	14	-	23295652	23302859	protein phosphatase 1 regulatory subunit 3E [Source:HGNC Symbol;Acc:HGNC:14943]	protein_coding	2.41545	3.00307e-21
ENSG00000287776	AL513487.1	X	+	122422006	122478043	novel transcript	lncRNA	2.41499	3.7282e-17
ENSG00000167562	ZNF701	19	+	52555457	52587174	zinc finger protein 701 [Source:HGNC Symbol;Acc:HGNC:25597]	protein_coding	2.40674	2.21503e-14
ENSG00000205746	AC126755.1	16	-	18334400	18352476	polycystic kidney disease 1 (autosomal dominant) (PKD1) pseudogene	transcribed_unprocessed_pseudogene	2.40596	3.57301e-12
ENSG00000249279	LINC02057	5	-	61201304	61304811	long intergenic non-protein coding RNA 2057 [Source:HGNC Symbol;Acc:HGNC:52900]	lncRNA	2.40513	1.65087e-11
ENSG00000255491	AC100858.3	8	-	124811042	124857516	uncharacterized LOC105375743 [Source:NCBI gene (formerly Entrezgene);Acc:105375743]	lncRNA	2.40467	2.47159e-13
ENSG00000276710	CSPG4P10	15	+	82459472	82477258	chondroitin sulfate proteoglycan 4 pseudogene 10 [Source:HGNC Symbol;Acc:HGNC:48361]	transcribed_unprocessed_pseudogene	2.40044	9.1631e-41
ENSG00000231160	KLF3-AS1	4	-	38602438	38664914	KLF3 antisense RNA 1 [Source:HGNC Symbol;Acc:HGNC:25796]	lncRNA	2.40042	5.84648e-24
ENSG00000262185	LINC02861	16	-	3930806	3950586	long intergenic non-protein coding RNA 2861 [Source:HGNC Symbol;Acc:HGNC:54406]	lncRNA	2.40011	4.71353e-07
ENSG00000271880	AGAP11	10	+	86970741	87010126	ArfGAP with GTPase domain, ankyrin repeat and PH domain 11 [Source:HGNC Symbol;Acc:HGNC:29421]	lncRNA	2.39804	1.42312e-121
ENSG00000196549	MME	3	+	155024124	155183704	membrane metalloendopeptidase [Source:HGNC Symbol;Acc:HGNC:7154]	protein_coding	2.39748	0
ENSG00000197921	HES5	1	-	2528745	2530263	hes family bHLH transcription factor 5 [Source:HGNC Symbol;Acc:HGNC:19764]	protein_coding	2.39438	1.93085e-54
ENSG00000169247	SH3TC2	5	-	148923639	149063163	SH3 domain and tetratricopeptide repeats 2 [Source:HGNC Symbol;Acc:HGNC:29427]	protein_coding	2.39395	3.8486e-23
ENSG00000167037	SGSM1	22	+	24806169	24927578	small G protein signaling modulator 1 [Source:HGNC Symbol;Acc:HGNC:29410]	protein_coding	2.39273	2.51809e-39
ENSG00000125618	PAX8	2	-	113215997	113278921	paired box 8 [Source:HGNC Symbol;Acc:HGNC:8622]	protein_coding	2.3922	1.93253e-06
ENSG00000163218	PGLYRP4	1	-	153330120	153348841	peptidoglycan recognition protein 4 [Source:HGNC Symbol;Acc:HGNC:30015]	protein_coding	2.39166	9.84114e-28
ENSG00000069812	HES2	1	-	6412418	6424670	hes family bHLH transcription factor 2 [Source:HGNC Symbol;Acc:HGNC:16005]	protein_coding	2.39034	8.01854e-232
ENSG00000278601	AL158163.2	10	+	110907483	110908182	novel transcript, antisense to BBIP1	lncRNA	2.38585	1.54454e-07
ENSG00000198963	RORB	9	+	74497335	74693177	RAR related orphan receptor B [Source:HGNC Symbol;Acc:HGNC:10259]	protein_coding	2.38546	1.23639e-20
ENSG00000241935	HOGA1	10	+	97584323	97612802	4-hydroxy-2-oxoglutarate aldolase 1 [Source:HGNC Symbol;Acc:HGNC:25155]	protein_coding	2.38503	1.45269e-20
ENSG00000152578	GRIA4	11	+	105609994	105982092	glutamate ionotropic receptor AMPA type subunit 4 [Source:HGNC Symbol;Acc:HGNC:4574]	protein_coding	2.38478	5.39077e-18
ENSG00000272142	LYRM4-AS1	6	+	5003774	5045666	LYRM4 antisense RNA 1 [Source:NCBI gene (formerly Entrezgene);Acc:100129461]	lncRNA	2.38261	2.17981e-12
ENSG00000251616	AC113410.2	5	-	133111055	133114475	novel transcript	lncRNA	2.38169	5.15687e-10
ENSG00000103044	HAS3	16	+	69105653	69118719	hyaluronan synthase 3 [Source:HGNC Symbol;Acc:HGNC:4820]	protein_coding	2.37911	3.42592e-34
ENSG00000164488	DACT2	6	-	168292830	168319777	dishevelled binding antagonist of beta catenin 2 [Source:HGNC Symbol;Acc:HGNC:21231]	protein_coding	2.3779	1.21053e-37
ENSG00000268173	AC007192.1	19	+	18153158	18178117	novel protein, readthrough between PIK3R2 and IFI30	protein_coding	2.37498	4.16546e-25
ENSG00000157540	DYRK1A	21	+	37365573	37526358	dual specificity tyrosine phosphorylation regulated kinase 1A [Source:HGNC Symbol;Acc:HGNC:3091]	protein_coding	2.37198	2.95411e-98
ENSG00000237989	LINC01679	21	-	43358147	43362349	long intergenic non-protein coding RNA 1679 [Source:HGNC Symbol;Acc:HGNC:52469]	lncRNA	2.36934	1.30935e-18
ENSG00000284431	AL022238.3	22	+	40346529	40410054	novel protein	protein_coding	2.36588	8.93885e-24
ENSG00000265763	ZNF488	10	-	47365496	47384293	zinc finger protein 488 [Source:HGNC Symbol;Acc:HGNC:23535]	protein_coding	2.36466	7.69998e-08
ENSG00000127152	BCL11B	14	-	99169287	99272197	BAF chromatin remodeling complex subunit BCL11B [Source:HGNC Symbol;Acc:HGNC:13222]	protein_coding	2.36323	5.69958e-56
ENSG00000118557	PMFBP1	16	-	72112157	72176878	polyamine modulated factor 1 binding protein 1 [Source:HGNC Symbol;Acc:HGNC:17728]	protein_coding	2.35825	4.64716e-24
ENSG00000087510	TFAP2C	20	+	56629306	56639283	transcription factor AP-2 gamma [Source:HGNC Symbol;Acc:HGNC:11744]	protein_coding	2.34995	1.99523e-241
ENSG00000141401	IMPA2	18	+	11981025	12030877	inositol monophosphatase 2 [Source:HGNC Symbol;Acc:HGNC:6051]	protein_coding	2.34796	6.5178e-134
ENSG00000245149	RNF139-AS1	8	-	124462485	124474582	RNF139 antisense RNA 1 (head to head) [Source:HGNC Symbol;Acc:HGNC:48940]	lncRNA	2.34672	5.82123e-20
ENSG00000142583	SLC2A5	1	-	9035106	9088478	solute carrier family 2 member 5 [Source:HGNC Symbol;Acc:HGNC:11010]	protein_coding	2.34642	1.8578e-46
ENSG00000236088	COX10-AS1	17	-	13755574	14069495	COX10 antisense RNA 1 [Source:HGNC Symbol;Acc:HGNC:38873]	lncRNA	2.34356	4.62287e-19
ENSG00000073282	TP63	3	+	189631389	189897276	tumor protein p63 [Source:HGNC Symbol;Acc:HGNC:15979]	protein_coding	2.3428	0
ENSG00000186732	MPPED1	22	+	43411196	43507848	metallophosphoesterase domain containing 1 [Source:HGNC Symbol;Acc:HGNC:1306]	protein_coding	2.34277	3.43881e-23
ENSG00000286277	AL009177.1	6	+	14431683	14502701	novel transcript	lncRNA	2.34187	3.27189e-08
ENSG00000247373	TMED2-DT	12	-	123575891	123585115	TMED2 divergent transcript [Source:HGNC Symbol;Acc:HGNC:53346]	lncRNA	2.33881	3.10838e-08
ENSG00000034239	EFCAB1	8	-	48710789	48735311	EF-hand calcium binding domain 1 [Source:HGNC Symbol;Acc:HGNC:25678]	protein_coding	2.33873	8.58475e-21
ENSG00000115596	WNT6	2	+	218859805	218874233	Wnt family member 6 [Source:HGNC Symbol;Acc:HGNC:12785]	protein_coding	2.33514	4.4227e-07
ENSG00000151320	AKAP6	14	+	32329298	32837684	A-kinase anchoring protein 6 [Source:HGNC Symbol;Acc:HGNC:376]	protein_coding	2.33457	1.99402e-24
ENSG00000131400	NAPSA	19	-	50358477	50365830	napsin A aspartic peptidase [Source:HGNC Symbol;Acc:HGNC:13395]	protein_coding	2.33098	7.035e-07
ENSG00000268471	MIR4453HG	4	+	152536264	152539263	MIR4453 host gene [Source:HGNC Symbol;Acc:HGNC:25288]	lncRNA	2.33071	7.81775e-17
ENSG00000125551	PLGLB2	2	+	87748087	87759476	plasminogen like B2 [Source:HGNC Symbol;Acc:HGNC:9073]	protein_coding	2.33011	4.05245e-06
ENSG00000101144	BMP7	20	-	57168753	57266641	bone morphogenetic protein 7 [Source:HGNC Symbol;Acc:HGNC:1074]	protein_coding	2.32944	0
ENSG00000118596	SLC16A7	12	+	59596029	59789855	solute carrier family 16 member 7 [Source:HGNC Symbol;Acc:HGNC:10928]	protein_coding	2.32505	1.29184e-181
ENSG00000230750	SDAD1P2	20	+	10385779	10387806	SDA1 domain containing 1 pseudogene 2 [Source:HGNC Symbol;Acc:HGNC:31404]	processed_pseudogene	2.32434	6.26353e-07
ENSG00000183760	ACP7	19	+	39083913	39111493	acid phosphatase 7, tartrate resistant (putative) [Source:HGNC Symbol;Acc:HGNC:33781]	protein_coding	2.32249	4.91191e-09
ENSG00000072041	SLC6A15	12	-	84859491	84913615	solute carrier family 6 member 15 [Source:HGNC Symbol;Acc:HGNC:13621]	protein_coding	2.32223	4.5061e-35
ENSG00000168906	MAT2A	2	+	85539168	85545281	methionine adenosyltransferase 2A [Source:HGNC Symbol;Acc:HGNC:6904]	protein_coding	2.32184	0
ENSG00000166483	WEE1	11	+	9573670	9593457	WEE1 G2 checkpoint kinase [Source:HGNC Symbol;Acc:HGNC:12761]	protein_coding	2.32031	3.84959e-273
ENSG00000004777	ARHGAP33	19	+	35774532	35788822	Rho GTPase activating protein 33 [Source:HGNC Symbol;Acc:HGNC:23085]	protein_coding	2.31964	1.00507e-06
ENSG00000146648	EGFR	7	+	55019017	55211628	epidermal growth factor receptor [Source:HGNC Symbol;Acc:HGNC:3236]	protein_coding	2.31887	0
ENSG00000091128	LAMB4	7	-	108023548	108130361	laminin subunit beta 4 [Source:HGNC Symbol;Acc:HGNC:6491]	protein_coding	2.31614	8.75609e-177
ENSG00000130522	JUND	19	-	18279694	18281622	JunD proto-oncogene, AP-1 transcription factor subunit [Source:HGNC Symbol;Acc:HGNC:6206]	protein_coding	2.31515	0
ENSG00000286214	AUXG01000058.1	7	+	130538954	130546900	COPG2 imprinted transcript 1	lncRNA	2.3134	2.05292e-09
ENSG00000151575	TEX9	15	+	56244009	56445997	testis expressed 9 [Source:HGNC Symbol;Acc:HGNC:29585]	protein_coding	2.31199	2.04202e-16
ENSG00000259820	AC083843.2	8	-	134792020	134798272	novel transcript	lncRNA	2.31179	8.87372e-35
ENSG00000147606	SLC26A7	8	+	91209494	91398155	solute carrier family 26 member 7 [Source:HGNC Symbol;Acc:HGNC:14467]	protein_coding	2.31007	1.70611e-09
ENSG00000158467	AHCYL2	7	+	129225023	129430211	adenosylhomocysteinase like 2 [Source:HGNC Symbol;Acc:HGNC:22204]	protein_coding	2.30806	7.56253e-145
ENSG00000212907	MT-ND4L	MT	+	10470	10766	mitochondrially encoded NADH:ubiquinone oxidoreductase core subunit 4L [Source:HGNC Symbol;Acc:HGNC:7460]	protein_coding	2.30761	0
ENSG00000228144	AC078927.1	12	-	66123917	66169985	novel protein	protein_coding	2.30305	2.5271e-06
ENSG00000197106	SLC6A17	1	+	110150494	110202202	solute carrier family 6 member 17 [Source:HGNC Symbol;Acc:HGNC:31399]	protein_coding	2.30173	1.3995e-11
ENSG00000169594	BNC1	15	-	83255903	83284714	basonuclin 1 [Source:HGNC Symbol;Acc:HGNC:1081]	protein_coding	2.30114	2.10433e-153
ENSG00000189045	ANKDD1B	5	+	75611182	75681773	ankyrin repeat and death domain containing 1B [Source:HGNC Symbol;Acc:HGNC:32525]	protein_coding	2.30027	1.93253e-06
ENSG00000074054	CLASP1	2	-	121337776	121649476	cytoplasmic linker associated protein 1 [Source:HGNC Symbol;Acc:HGNC:17088]	protein_coding	2.29972	9.40846e-159
ENSG00000261366	MANEA-DT	6	-	95575183	95577450	MANEA divergent transcript [Source:HGNC Symbol;Acc:HGNC:43732]	lncRNA	2.29949	2.5271e-06
ENSG00000250251	PKD1P6	16	-	15125242	15154564	polycystin 1, transient receptor potential channel interacting pseudogene 6 [Source:HGNC Symbol;Acc:HGNC:30070]	transcribed_unprocessed_pseudogene	2.29574	5.81206e-59
ENSG00000247950	SEC24B-AS1	4	-	109347475	109433817	SEC24B antisense RNA 1 [Source:HGNC Symbol;Acc:HGNC:44003]	lncRNA	2.29377	3.91834e-06
ENSG00000186081	KRT5	12	-	52514575	52520530	keratin 5 [Source:HGNC Symbol;Acc:HGNC:6442]	protein_coding	2.29366	0
ENSG00000250328	MGC32805	5	-	122436497	122479087	uncharacterized LOC153163 [Source:NCBI gene (formerly Entrezgene);Acc:153163]	lncRNA	2.29333	1.22826e-18
ENSG00000101384	JAG1	20	-	10637684	10673999	jagged canonical Notch ligand 1 [Source:HGNC Symbol;Acc:HGNC:6188]	protein_coding	2.29235	0
ENSG00000183666	GUSBP1	5	+	21341833	21589372	GUSB pseudogene 1 [Source:HGNC Symbol;Acc:HGNC:13670]	transcribed_unprocessed_pseudogene	2.29204	9.29082e-17
ENSG00000285791	AC009879.3	8	+	66432486	66518524	novel transcript	protein_coding	2.28975	7.035e-07
ENSG00000131389	SLC6A6	3	+	14402576	14489349	solute carrier family 6 member 6 [Source:HGNC Symbol;Acc:HGNC:11052]	protein_coding	2.28883	0
ENSG00000272512	AL645608.7	1	-	995966	998051	novel transcript	lncRNA	2.28657	5.24463e-07
ENSG00000114812	VIPR1	3	+	42489299	42537573	vasoactive intestinal peptide receptor 1 [Source:HGNC Symbol;Acc:HGNC:12694]	protein_coding	2.28485	1.1582e-113
ENSG00000251562	MALAT1	11	+	65497688	65506516	metastasis associated lung adenocarcinoma transcript 1 [Source:HGNC Symbol;Acc:HGNC:29665]	lncRNA	2.28389	0
ENSG00000129173	E2F8	11	-	19224063	19241620	E2F transcription factor 8 [Source:HGNC Symbol;Acc:HGNC:24727]	protein_coding	2.28319	1.7616e-14
ENSG00000274220	AC009163.7	16	+	75433836	75436392	novel transcript	lncRNA	2.27958	3.46166e-09
ENSG00000169548	ZNF280A	22	-	22513736	22520270	zinc finger protein 280A [Source:HGNC Symbol;Acc:HGNC:18597]	protein_coding	2.27745	7.61816e-13
ENSG00000177519	RPRM	2	-	153477338	153478762	reprimo, TP53 dependent G2 arrest mediator homolog [Source:HGNC Symbol;Acc:HGNC:24201]	protein_coding	2.27664	1.09389e-10
ENSG00000246596	AC139795.1	5	-	177619059	177672209	SUMO interacting motifs containing 1 (SIMC1) pseudogene	transcribed_unprocessed_pseudogene	2.27646	4.57029e-10
ENSG00000126016	AMOT	X	-	112774503	112840815	angiomotin [Source:HGNC Symbol;Acc:HGNC:17810]	protein_coding	2.27185	5.72005e-75
ENSG00000185650	ZFP36L1	14	-	68787660	68796253	ZFP36 ring finger protein like 1 [Source:HGNC Symbol;Acc:HGNC:1107]	protein_coding	2.26384	0
ENSG00000112294	ALDH5A1	6	+	24494867	24537207	aldehyde dehydrogenase 5 family member A1 [Source:HGNC Symbol;Acc:HGNC:408]	protein_coding	2.26345	4.10043e-148
ENSG00000163637	PRICKLE2	3	-	64092236	64445476	prickle planar cell polarity protein 2 [Source:HGNC Symbol;Acc:HGNC:20340]	protein_coding	2.26329	1.87927e-17
ENSG00000117394	SLC2A1	1	-	42925353	42958893	solute carrier family 2 member 1 [Source:HGNC Symbol;Acc:HGNC:11005]	protein_coding	2.26102	0
ENSG00000162664	ZNF326	1	+	89995110	90035533	zinc finger protein 326 [Source:HGNC Symbol;Acc:HGNC:14104]	protein_coding	2.25954	3.71502e-72
ENSG00000143753	DEGS1	1	+	224175756	224193441	delta 4-desaturase, sphingolipid 1 [Source:HGNC Symbol;Acc:HGNC:13709]	protein_coding	2.2586	0
ENSG00000137709	POU2F3	11	+	120236640	120319945	POU class 2 homeobox 3 [Source:HGNC Symbol;Acc:HGNC:19864]	protein_coding	2.25215	6.64817e-34
ENSG00000110400	NECTIN1	11	-	119623408	119729200	nectin cell adhesion molecule 1 [Source:HGNC Symbol;Acc:HGNC:9706]	protein_coding	2.24897	0
ENSG00000101349	PAK5	20	-	9537389	9839041	p21 (RAC1) activated kinase 5 [Source:HGNC Symbol;Acc:HGNC:15916]	protein_coding	2.24814	3.89418e-08
ENSG00000140563	MCTP2	15	+	94231538	94483952	multiple C2 and transmembrane domain containing 2 [Source:HGNC Symbol;Acc:HGNC:25636]	protein_coding	2.2447	1.77146e-82
ENSG00000007171	NOS2	17	-	27756766	27800529	nitric oxide synthase 2 [Source:HGNC Symbol;Acc:HGNC:7873]	protein_coding	2.24327	2.3071e-62
ENSG00000257354	AC048341.1	12	+	62602752	62622213	novel transcript	lncRNA	2.23845	4.01004e-30
ENSG00000122733	PHF24	9	+	34957608	34982544	PHD finger protein 24 [Source:HGNC Symbol;Acc:HGNC:29180]	protein_coding	2.23663	3.01096e-06
ENSG00000115507	OTX1	2	+	63050057	63057836	orthodenticle homeobox 1 [Source:HGNC Symbol;Acc:HGNC:8521]	protein_coding	2.23474	3.52011e-258
ENSG00000253438	PCAT1	8	+	126556323	127419050	prostate cancer associated transcript 1 [Source:HGNC Symbol;Acc:HGNC:43022]	lncRNA	2.23469	1.17212e-09
ENSG00000122824	NUDT10	X	+	51332231	51337525	nudix hydrolase 10 [Source:HGNC Symbol;Acc:HGNC:17621]	protein_coding	2.23443	4.02878e-09
ENSG00000167470	MIDN	19	+	1248553	1259140	midnolin [Source:HGNC Symbol;Acc:HGNC:16298]	protein_coding	2.23289	3.35151e-200
ENSG00000232445	EMSLR	7	+	101308270	101314800	E2F1 mRNA stabilizing lncRNA [Source:HGNC Symbol;Acc:HGNC:54408]	lncRNA	2.2319	1.49266e-06
ENSG00000197083	ZNF300P1	5	-	150930645	150946289	zinc finger protein 300 pseudogene 1 [Source:HGNC Symbol;Acc:HGNC:27032]	transcribed_unprocessed_pseudogene	2.23021	8.64639e-23
ENSG00000074706	IPCEF1	6	-	154154496	154356792	interaction protein for cytohesin exchange factors 1 [Source:HGNC Symbol;Acc:HGNC:21204]	protein_coding	2.22837	5.73538e-83
ENSG00000186648	CARMIL3	14	+	24052009	24069729	capping protein regulator and myosin 1 linker 3 [Source:HGNC Symbol;Acc:HGNC:20272]	protein_coding	2.22672	1.98311e-09
ENSG00000071991	CDH19	18	-	66501083	66604138	cadherin 19 [Source:HGNC Symbol;Acc:HGNC:1758]	protein_coding	2.22664	2.969e-12
ENSG00000226688	ENTPD1-AS1	10	-	95732976	96090250	ENTPD1 antisense RNA 1 [Source:HGNC Symbol;Acc:HGNC:45203]	lncRNA	2.22609	4.07443e-09
ENSG00000180801	ARSJ	4	-	113900284	113979727	arylsulfatase family member J [Source:HGNC Symbol;Acc:HGNC:26286]	protein_coding	2.22216	6.49989e-23
ENSG00000170006	TMEM154	4	-	152618628	152680012	transmembrane protein 154 [Source:HGNC Symbol;Acc:HGNC:26489]	protein_coding	2.22191	7.82094e-166
ENSG00000213062	Z99572.1	1	+	169486076	169500182	novel transcript	lncRNA	2.21958	2.0158e-32
ENSG00000137103	TMEM8B	9	+	35814451	35865518	transmembrane protein 8B [Source:HGNC Symbol;Acc:HGNC:21427]	protein_coding	2.21738	3.16675e-38
ENSG00000148339	SLC25A25	9	+	128068201	128109245	solute carrier family 25 member 25 [Source:HGNC Symbol;Acc:HGNC:20663]	protein_coding	2.21645	3.20456e-70
ENSG00000016602	CLCA4	1	+	86547078	86580754	chloride channel accessory 4 [Source:HGNC Symbol;Acc:HGNC:2018]	protein_coding	2.21334	0
ENSG00000148926	ADM	11	+	10305073	10307397	adrenomedullin [Source:HGNC Symbol;Acc:HGNC:259]	protein_coding	2.20966	5.21467e-159
ENSG00000180385	EMC3-AS1	3	+	9986893	10006990	EMC3 antisense RNA 1 [Source:HGNC Symbol;Acc:HGNC:49223]	transcribed_unprocessed_pseudogene	2.20916	2.99858e-06
ENSG00000133639	BTG1	12	-	92140278	92145846	BTG anti-proliferation factor 1 [Source:HGNC Symbol;Acc:HGNC:1130]	protein_coding	2.20851	0
ENSG00000100146	SOX10	22	-	37970686	37987422	SRY-box transcription factor 10 [Source:HGNC Symbol;Acc:HGNC:11190]	protein_coding	2.20848	8.78455e-17
ENSG00000185069	KRT76	12	-	52768155	52777345	keratin 76 [Source:HGNC Symbol;Acc:HGNC:24430]	protein_coding	2.20565	5.29815e-18
ENSG00000146674	IGFBP3	7	-	45912245	45921874	insulin like growth factor binding protein 3 [Source:HGNC Symbol;Acc:HGNC:5472]	protein_coding	2.19789	0
ENSG00000146281	PM20D2	6	+	89146055	89165565	peptidase M20 domain containing 2 [Source:HGNC Symbol;Acc:HGNC:21408]	protein_coding	2.19707	1.96756e-141
ENSG00000117036	ETV3	1	-	157121191	157138474	ETS variant transcription factor 3 [Source:HGNC Symbol;Acc:HGNC:3492]	protein_coding	2.19641	4.68084e-173
ENSG00000166126	AMN	14	+	102922663	102933596	amnion associated transmembrane protein [Source:HGNC Symbol;Acc:HGNC:14604]	protein_coding	2.19508	4.72604e-33
ENSG00000086570	FAT2	5	-	151504093	151568944	FAT atypical cadherin 2 [Source:HGNC Symbol;Acc:HGNC:3596]	protein_coding	2.19442	0
ENSG00000229956	ZRANB2-AS2	1	+	71081324	71489976	ZRANB2 antisense RNA 2 (head to head) [Source:HGNC Symbol;Acc:HGNC:43595]	lncRNA	2.19147	8.98774e-07
ENSG00000238197	PAXBP1-AS1	21	+	32728097	32747065	PAXBP1 antisense RNA 1 [Source:HGNC Symbol;Acc:HGNC:39603]	lncRNA	2.18879	5.63272e-14
ENSG00000073464	CLCN4	X	+	10156975	10237660	chloride voltage-gated channel 4 [Source:HGNC Symbol;Acc:HGNC:2022]	protein_coding	2.18862	5.40174e-50
ENSG00000276386	CNTNAP3P2	9	+	67059560	67293468	CNTNAP3 pseudogene 2 [Source:HGNC Symbol;Acc:HGNC:49589]	unprocessed_pseudogene	2.18766	7.6608e-12
ENSG00000149328	GLB1L2	11	+	134331874	134378341	galactosidase beta 1 like 2 [Source:HGNC Symbol;Acc:HGNC:25129]	protein_coding	2.18759	5.32842e-11
ENSG00000185621	LMLN	3	+	197960200	198043720	leishmanolysin like peptidase [Source:HGNC Symbol;Acc:HGNC:15991]	protein_coding	2.18399	1.56366e-32
ENSG00000145375	SPATA5	4	+	122923070	123319433	spermatogenesis associated 5 [Source:HGNC Symbol;Acc:HGNC:18119]	protein_coding	2.18147	8.12275e-77
ENSG00000263001	GTF2I	7	+	74650231	74760692	general transcription factor IIi [Source:HGNC Symbol;Acc:HGNC:4659]	protein_coding	2.17799	1.86759e-197
ENSG00000060140	STYK1	12	-	10618923	10674318	serine/threonine/tyrosine kinase 1 [Source:HGNC Symbol;Acc:HGNC:18889]	protein_coding	2.17428	3.15391e-42
ENSG00000189221	MAOA	X	+	43654907	43746824	monoamine oxidase A [Source:HGNC Symbol;Acc:HGNC:6833]	protein_coding	2.17376	0
ENSG00000165300	SLITRK5	13	+	87672615	87696272	SLIT and NTRK like family member 5 [Source:HGNC Symbol;Acc:HGNC:20295]	protein_coding	2.17238	1.24597e-20
ENSG00000169851	PCDH7	4	+	30720415	31146805	protocadherin 7 [Source:HGNC Symbol;Acc:HGNC:8659]	protein_coding	2.17078	4.5249e-133
ENSG00000259030	FPGT-TNNI3K	1	+	74198235	74544393	FPGT-TNNI3K readthrough [Source:HGNC Symbol;Acc:HGNC:42952]	protein_coding	2.17049	2.47276e-33
ENSG00000168743	NPNT	4	+	105894775	106004027	nephronectin [Source:HGNC Symbol;Acc:HGNC:27405]	protein_coding	2.17042	8.53064e-135
ENSG00000173611	SCAI	9	-	124942608	125143528	suppressor of cancer cell invasion [Source:HGNC Symbol;Acc:HGNC:26709]	protein_coding	2.1684	6.75466e-43
ENSG00000164303	ENPP6	4	-	184088706	184221230	ectonucleotide pyrophosphatase/phosphodiesterase 6 [Source:HGNC Symbol;Acc:HGNC:23409]	protein_coding	2.16677	1.01787e-06
ENSG00000236778	INTS6-AS1	13	+	51452364	51554678	INTS6 antisense RNA 1 [Source:HGNC Symbol;Acc:HGNC:42691]	lncRNA	2.16672	1.9933e-13
ENSG00000164292	RHOBTB3	5	+	95713522	95824383	Rho related BTB domain containing 3 [Source:HGNC Symbol;Acc:HGNC:18757]	protein_coding	2.16666	1.68368e-280
ENSG00000142632	ARHGEF19	1	-	16197854	16212652	Rho guanine nucleotide exchange factor 19 [Source:HGNC Symbol;Acc:HGNC:26604]	protein_coding	2.16558	2.32744e-110
ENSG00000204528	PSORS1C3	6	-	31173735	31177899	psoriasis susceptibility 1 candidate 3 [Source:HGNC Symbol;Acc:HGNC:17203]	lncRNA	2.16462	2.7556e-07
ENSG00000174808	BTC	4	-	74744759	74794523	betacellulin [Source:HGNC Symbol;Acc:HGNC:1121]	protein_coding	2.1625	4.70585e-22
ENSG00000268416	AC010329.1	19	-	20746923	20755250	novel transcript	lncRNA	2.16072	3.11756e-32
ENSG00000157168	NRG1	8	+	31639222	32855666	neuregulin 1 [Source:HGNC Symbol;Acc:HGNC:7997]	protein_coding	2.16041	1.28361e-36
ENSG00000162924	REL	2	+	60881521	60931612	REL proto-oncogene, NF-kB subunit [Source:HGNC Symbol;Acc:HGNC:9954]	protein_coding	2.15902	3.89234e-81
ENSG00000078081	LAMP3	3	-	183122215	183163839	lysosomal associated membrane protein 3 [Source:HGNC Symbol;Acc:HGNC:14582]	protein_coding	2.15863	1.5838e-57
ENSG00000287545	AP001994.2	11	+	119832966	119867682	novel transcript	lncRNA	2.15798	2.65614e-07
ENSG00000164197	RNF180	5	+	64165843	64372869	ring finger protein 180 [Source:HGNC Symbol;Acc:HGNC:27752]	protein_coding	2.15655	7.56967e-54
ENSG00000143126	CELSR2	1	+	109249539	109275751	cadherin EGF LAG seven-pass G-type receptor 2 [Source:HGNC Symbol;Acc:HGNC:3231]	protein_coding	2.15642	1.81676e-176
ENSG00000151150	ANK3	10	-	60026298	60733490	ankyrin 3 [Source:HGNC Symbol;Acc:HGNC:494]	protein_coding	2.15396	1.63298e-134
ENSG00000198743	SLC5A3	21	+	34073578	34106260	solute carrier family 5 member 3 [Source:HGNC Symbol;Acc:HGNC:11038]	protein_coding	2.15148	3.64654e-183
ENSG00000180867	PDIA3P1	1	+	147172744	147179622	protein disulfide isomerase family A member 3 pseudogene 1 [Source:HGNC Symbol;Acc:HGNC:4607]	transcribed_processed_pseudogene	2.14787	4.02696e-19
ENSG00000232656	IDI2-AS1	10	+	1022630	1045425	IDI2 antisense RNA 1 [Source:HGNC Symbol;Acc:HGNC:30885]	lncRNA	2.14731	5.18208e-07
ENSG00000186197	EDARADD	1	+	236348257	236502915	EDAR associated death domain [Source:HGNC Symbol;Acc:HGNC:14341]	protein_coding	2.14591	7.83583e-176
ENSG00000149639	SOGA1	20	-	36777447	36863538	suppressor of glucose, autophagy associated 1 [Source:HGNC Symbol;Acc:HGNC:16111]	protein_coding	2.14493	3.27565e-135
ENSG00000204410	MSH5	6	+	31739677	31762676	mutS homolog 5 [Source:HGNC Symbol;Acc:HGNC:7328]	protein_coding	2.14452	5.77715e-09
ENSG00000214652	ZNF727	7	+	64045434	64085339	zinc finger protein 727 [Source:HGNC Symbol;Acc:HGNC:22785]	protein_coding	2.13999	2.79232e-21
ENSG00000072133	RPS6KA6	X	-	84058346	84188199	ribosomal protein S6 kinase A6 [Source:HGNC Symbol;Acc:HGNC:10435]	protein_coding	2.13988	1.03908e-39
ENSG00000178882	RFLNA	12	+	123973241	124316024	refilin A [Source:HGNC Symbol;Acc:HGNC:27051]	protein_coding	2.13708	1.18503e-18
ENSG00000110693	SOX6	11	-	15966449	16739591	SRY-box transcription factor 6 [Source:HGNC Symbol;Acc:HGNC:16421]	protein_coding	2.13592	7.31395e-33
ENSG00000261189	AL031058.1	6	-	7540451	7541338	novel transcript, antisense to DSP	lncRNA	2.13518	1.47724e-14
ENSG00000178229	ZNF543	19	+	57320472	57330770	zinc finger protein 543 [Source:HGNC Symbol;Acc:HGNC:25281]	protein_coding	2.13446	1.03779e-24
ENSG00000183864	TOB2	22	-	41433494	41446801	transducer of ERBB2, 2 [Source:HGNC Symbol;Acc:HGNC:11980]	protein_coding	2.13285	7.97063e-272
ENSG00000116675	DNAJC6	1	+	65248219	65415871	DnaJ heat shock protein family (Hsp40) member C6 [Source:HGNC Symbol;Acc:HGNC:15469]	protein_coding	2.13226	7.49192e-14
ENSG00000285752	CDC42-AS1	1	-	22028317	22052927	CDC42 antisense RNA 1 [Source:HGNC Symbol;Acc:HGNC:54314]	lncRNA	2.13211	1.54027e-06
ENSG00000185436	IFNLR1	1	-	24154168	24187959	interferon lambda receptor 1 [Source:HGNC Symbol;Acc:HGNC:18584]	protein_coding	2.13125	6.335e-28
ENSG00000105141	CASP14	19	+	15049480	15058293	caspase 14 [Source:HGNC Symbol;Acc:HGNC:1502]	protein_coding	2.1297	8.66573e-18
ENSG00000215417	MIR17HG	13	+	91347820	91354579	miR-17-92a-1 cluster host gene [Source:HGNC Symbol;Acc:HGNC:23564]	lncRNA	2.12917	3.36499e-12
ENSG00000204388	HSPA1B	6	+	31827738	31830254	heat shock protein family A (Hsp70) member 1B [Source:HGNC Symbol;Acc:HGNC:5233]	protein_coding	2.12853	0
ENSG00000146263	MMS22L	6	-	97142161	97283217	MMS22 like, DNA repair protein [Source:HGNC Symbol;Acc:HGNC:21475]	protein_coding	2.12805	8.22306e-23
ENSG00000131771	PPP1R1B	17	+	39626740	39636626	protein phosphatase 1 regulatory inhibitor subunit 1B [Source:HGNC Symbol;Acc:HGNC:9287]	protein_coding	2.12721	3.61482e-145
ENSG00000105880	DLX5	7	-	97020396	97024950	distal-less homeobox 5 [Source:HGNC Symbol;Acc:HGNC:2918]	protein_coding	2.12719	6.3915e-15
ENSG00000130702	LAMA5	20	-	62307955	62367312	laminin subunit alpha 5 [Source:HGNC Symbol;Acc:HGNC:6485]	protein_coding	2.12629	0
ENSG00000082438	COBLL1	2	-	164653624	164843679	cordon-bleu WH2 repeat protein like 1 [Source:HGNC Symbol;Acc:HGNC:23571]	protein_coding	2.12523	4.79658e-161
ENSG00000091129	NRCAM	7	-	108147623	108456717	neuronal cell adhesion molecule [Source:HGNC Symbol;Acc:HGNC:7994]	protein_coding	2.12191	6.63579e-12
ENSG00000156172	C8orf37	8	-	95244913	95269201	chromosome 8 open reading frame 37 [Source:HGNC Symbol;Acc:HGNC:27232]	protein_coding	2.11915	4.85883e-20
ENSG00000205189	ZBTB10	8	+	80485619	80526265	zinc finger and BTB domain containing 10 [Source:HGNC Symbol;Acc:HGNC:30953]	protein_coding	2.11846	1.60263e-119
ENSG00000008277	ADAM22	7	+	87934143	88202889	ADAM metallopeptidase domain 22 [Source:HGNC Symbol;Acc:HGNC:201]	protein_coding	2.11788	1.40983e-10
ENSG00000225914	TSBP1-AS1	6	+	32254640	32407763	TSBP1 and BTNL2 antisense RNA 1 [Source:HGNC Symbol;Acc:HGNC:39756]	lncRNA	2.11671	2.48944e-06
ENSG00000102854	MSLN	16	+	760734	768865	mesothelin [Source:HGNC Symbol;Acc:HGNC:7371]	protein_coding	2.11611	1.07011e-146
ENSG00000185697	MYBL1	8	-	66562175	66614247	MYB proto-oncogene like 1 [Source:HGNC Symbol;Acc:HGNC:7547]	protein_coding	2.11427	2.08938e-13
ENSG00000254815	LMNTD2-AS1	11	+	557595	560107	LMNTD2 antisense RNA 1 [Source:HGNC Symbol;Acc:HGNC:41204]	lncRNA	2.11166	1.85611e-07
ENSG00000118298	CA14	1	+	150257251	150265078	carbonic anhydrase 14 [Source:HGNC Symbol;Acc:HGNC:1372]	protein_coding	2.11142	1.95911e-07
ENSG00000170074	FAM153A	5	-	177707981	177783398	family with sequence similarity 153 member A [Source:HGNC Symbol;Acc:HGNC:29940]	protein_coding	2.11137	2.5343e-18
ENSG00000146592	CREB5	7	+	28299321	28825894	cAMP responsive element binding protein 5 [Source:HGNC Symbol;Acc:HGNC:16844]	protein_coding	2.10967	4.09671e-161
ENSG00000249007	AL691482.3	1	+	202011370	202015657	novel transcript	lncRNA	2.10936	7.5726e-29
ENSG00000275180	AC048341.2	12	+	62603909	62604399	novel transcript	lncRNA	2.1077	4.78685e-07
ENSG00000175183	CSRP2	12	-	76858709	76879023	cysteine and glycine rich protein 2 [Source:HGNC Symbol;Acc:HGNC:2470]	protein_coding	2.10579	0
ENSG00000120471	TP53AIP1	11	-	128934731	128943399	tumor protein p53 regulated apoptosis inducing protein 1 [Source:HGNC Symbol;Acc:HGNC:29984]	protein_coding	2.10477	8.76266e-51
ENSG00000092758	COL9A3	20	+	62816244	62841159	collagen type IX alpha 3 chain [Source:HGNC Symbol;Acc:HGNC:2219]	protein_coding	2.10398	3.23754e-10
ENSG00000184731	FAM110C	2	-	38814	46870	family with sequence similarity 110 member C [Source:HGNC Symbol;Acc:HGNC:33340]	protein_coding	2.10185	1.41519e-292
ENSG00000138316	ADAMTS14	10	+	70672506	70762441	ADAM metallopeptidase with thrombospondin type 1 motif 14 [Source:HGNC Symbol;Acc:HGNC:14899]	protein_coding	2.10004	2.31378e-75
ENSG00000134294	SLC38A2	12	-	46358188	46372773	solute carrier family 38 member 2 [Source:HGNC Symbol;Acc:HGNC:13448]	protein_coding	2.09988	0
ENSG00000058056	USP13	3	+	179653040	179789401	ubiquitin specific peptidase 13 [Source:HGNC Symbol;Acc:HGNC:12611]	protein_coding	2.0995	6.52061e-50
ENSG00000186472	PCLO	7	-	82754012	83162930	piccolo presynaptic cytomatrix protein [Source:HGNC Symbol;Acc:HGNC:13406]	protein_coding	2.09922	1.13359e-51
ENSG00000075651	PLD1	3	-	171600404	171810950	phospholipase D1 [Source:HGNC Symbol;Acc:HGNC:9067]	protein_coding	2.09761	0
ENSG00000250685	AC009123.1	16	-	84192558	84197053	novel transcript, antisense to ADAD2	lncRNA	2.09721	3.51981e-19
ENSG00000155657	TTN	2	-	178525989	178830802	titin [Source:HGNC Symbol;Acc:HGNC:12403]	protein_coding	2.09689	1.06731e-36
ENSG00000170264	FAM161A	2	-	61824848	61854143	FAM161 centrosomal protein A [Source:HGNC Symbol;Acc:HGNC:25808]	protein_coding	2.09596	2.86312e-18
ENSG00000165887	ANKRD2	10	+	97572499	97583884	ankyrin repeat domain 2 [Source:HGNC Symbol;Acc:HGNC:495]	protein_coding	2.0916	3.9478e-08
ENSG00000071909	MYO3B	2	+	170178145	170655171	myosin IIIB [Source:HGNC Symbol;Acc:HGNC:15576]	protein_coding	2.09092	8.43316e-08
ENSG00000135069	PSAT1	9	+	78297125	78330093	phosphoserine aminotransferase 1 [Source:HGNC Symbol;Acc:HGNC:19129]	protein_coding	2.09006	0
ENSG00000274211	SOCS7	17	+	38351844	38405593	suppressor of cytokine signaling 7 [Source:HGNC Symbol;Acc:HGNC:29846]	protein_coding	2.08941	3.13394e-43
ENSG00000117139	KDM5B	1	-	202724495	202808487	lysine demethylase 5B [Source:HGNC Symbol;Acc:HGNC:18039]	protein_coding	2.08775	1.14519e-75
ENSG00000143061	IGSF3	1	-	116574399	116667755	immunoglobulin superfamily member 3 [Source:HGNC Symbol;Acc:HGNC:5950]	protein_coding	2.08753	4.25057e-198
ENSG00000254166	CASC19	8	-	127072694	127227541	cancer susceptibility 19 [Source:HGNC Symbol;Acc:HGNC:49476]	lncRNA	2.08567	7.51895e-13
ENSG00000149575	SCN2B	11	-	118157849	118162518	sodium voltage-gated channel beta subunit 2 [Source:HGNC Symbol;Acc:HGNC:10589]	protein_coding	2.08508	6.40958e-10
ENSG00000130701	RBBP8NL	20	-	62410237	62427539	RBBP8 N-terminal like [Source:HGNC Symbol;Acc:HGNC:16144]	protein_coding	2.0847	2.66806e-28
ENSG00000140993	TIGD7	16	-	3298808	3305729	tigger transposable element derived 7 [Source:HGNC Symbol;Acc:HGNC:18331]	protein_coding	2.08369	3.27142e-30
ENSG00000124177	CHD6	20	-	41402083	41618384	chromodomain helicase DNA binding protein 6 [Source:HGNC Symbol;Acc:HGNC:19057]	protein_coding	2.08239	2.89322e-139
ENSG00000205485	AC004980.1	7	+	76549360	76627982	pseudogene similar to part of postmeiotic segregation increased 2-like 3 PMS2L3	transcribed_unprocessed_pseudogene	2.07986	7.11783e-11
ENSG00000121716	PILRB	7	+	100352176	100367733	paired immunoglobin like type 2 receptor beta [Source:HGNC Symbol;Acc:HGNC:18297]	protein_coding	2.078	1.98147e-23
ENSG00000091656	ZFHX4	8	+	76681239	76867281	zinc finger homeobox 4 [Source:HGNC Symbol;Acc:HGNC:30939]	protein_coding	2.07707	2.50694e-17
ENSG00000105732	ZNF574	19	+	42068477	42081552	zinc finger protein 574 [Source:HGNC Symbol;Acc:HGNC:26166]	protein_coding	2.07702	5.83967e-35
ENSG00000068078	FGFR3	4	+	1793293	1808872	fibroblast growth factor receptor 3 [Source:HGNC Symbol;Acc:HGNC:3690]	protein_coding	2.077	0
ENSG00000080166	DCT	13	-	94436811	94479682	dopachrome tautomerase [Source:HGNC Symbol;Acc:HGNC:2709]	protein_coding	2.07666	0
ENSG00000103528	SYT17	16	+	19167971	19268332	synaptotagmin 17 [Source:HGNC Symbol;Acc:HGNC:24119]	protein_coding	2.07374	3.37121e-70
ENSG00000212916	MAP10	1	+	232804892	232808407	microtubule associated protein 10 [Source:HGNC Symbol;Acc:HGNC:29265]	protein_coding	2.07216	1.75644e-14
ENSG00000272734	ADIRF-AS1	10	-	86965345	86971311	ADIRF antisense RNA 1 [Source:HGNC Symbol;Acc:HGNC:45127]	lncRNA	2.07172	3.16027e-45
ENSG00000153721	CNKSR3	6	-	154387515	154510685	CNKSR family member 3 [Source:HGNC Symbol;Acc:HGNC:23034]	protein_coding	2.07123	2.77168e-91
ENSG00000171811	CFAP46	10	-	132808392	132942823	cilia and flagella associated protein 46 [Source:HGNC Symbol;Acc:HGNC:25247]	protein_coding	2.07038	8.19085e-09
ENSG00000121989	ACVR2A	2	+	147844517	147930826	activin A receptor type 2A [Source:HGNC Symbol;Acc:HGNC:173]	protein_coding	2.0701	9.11788e-94
ENSG00000229980	TOB1-AS1	17	+	50866679	50910774	TOB1 antisense RNA 1 [Source:HGNC Symbol;Acc:HGNC:44340]	lncRNA	2.06491	5.3137e-07
ENSG00000155846	PPARGC1B	5	+	149730298	149855022	PPARG coactivator 1 beta [Source:HGNC Symbol;Acc:HGNC:30022]	protein_coding	2.06361	2.15975e-45
ENSG00000241635	UGT1A1	2	+	233760270	233773300	UDP glucuronosyltransferase family 1 member A1 [Source:HGNC Symbol;Acc:HGNC:12530]	protein_coding	2.06249	1.38557e-22
ENSG00000188467	SLC24A5	15	+	48120990	48142672	solute carrier family 24 member 5 [Source:HGNC Symbol;Acc:HGNC:20611]	protein_coding	2.06201	1.88236e-39
ENSG00000119514	GALNT12	9	+	98807670	98850081	polypeptide N-acetylgalactosaminyltransferase 12 [Source:HGNC Symbol;Acc:HGNC:19877]	protein_coding	2.06111	7.28691e-105
ENSG00000099810	MTAP	9	+	21802636	21937651	methylthioadenosine phosphorylase [Source:HGNC Symbol;Acc:HGNC:7413]	protein_coding	2.05931	4.01276e-151
ENSG00000198046	ZNF667	19	-	56439325	56478065	zinc finger protein 667 [Source:HGNC Symbol;Acc:HGNC:28854]	protein_coding	2.0573	8.63292e-22
ENSG00000124171	PARD6B	20	+	50731580	50756795	par-6 family cell polarity regulator beta [Source:HGNC Symbol;Acc:HGNC:16245]	protein_coding	2.05623	1.08438e-34
ENSG00000159588	CCDC17	1	-	45620044	45624057	coiled-coil domain containing 17 [Source:HGNC Symbol;Acc:HGNC:26574]	protein_coding	2.05179	5.23627e-10
ENSG00000106692	FKTN	9	+	105558122	105653820	fukutin [Source:HGNC Symbol;Acc:HGNC:3622]	protein_coding	2.04911	1.66003e-50
ENSG00000285331	AC090517.5	15	-	56795460	56918499	novel transcript	lncRNA	2.04837	5.53316e-17
ENSG00000172264	MACROD2	20	+	13995369	16053197	mono-ADP ribosylhydrolase 2 [Source:HGNC Symbol;Acc:HGNC:16126]	protein_coding	2.04718	1.39779e-18
ENSG00000172292	CERS6	2	+	168456249	168775134	ceramide synthase 6 [Source:HGNC Symbol;Acc:HGNC:23826]	protein_coding	2.04631	4.03415e-261
ENSG00000198744	MTCO3P12	1	+	634376	634922	MT-CO3 pseudogene 12 [Source:HGNC Symbol;Acc:HGNC:52042]	unprocessed_pseudogene	2.04596	1.92646e-08
ENSG00000230943	LINC02541	6	-	113616927	113650090	long intergenic non-protein coding RNA 2541 [Source:HGNC Symbol;Acc:HGNC:53574]	lncRNA	2.04406	1.14295e-56
ENSG00000198466	ZNF587	19	+	57849859	57865117	zinc finger protein 587 [Source:HGNC Symbol;Acc:HGNC:30955]	protein_coding	2.04348	7.61568e-42
ENSG00000113578	FGF1	5	-	142592178	142698070	fibroblast growth factor 1 [Source:HGNC Symbol;Acc:HGNC:3665]	protein_coding	2.04028	1.99374e-101
ENSG00000176225	RTTN	18	-	70003031	70205726	rotatin [Source:HGNC Symbol;Acc:HGNC:18654]	protein_coding	2.03928	2.7613e-22
ENSG00000103257	SLC7A5	16	-	87830023	87869507	solute carrier family 7 member 5 [Source:HGNC Symbol;Acc:HGNC:11063]	protein_coding	2.03794	4.78664e-62
ENSG00000185950	IRS2	13	-	109752695	109786583	insulin receptor substrate 2 [Source:HGNC Symbol;Acc:HGNC:6126]	protein_coding	2.03775	4.565e-59
ENSG00000272899	ATP6V1FNB	7	+	128866330	128872047	ATP6V1F neighbor [Source:HGNC Symbol;Acc:HGNC:52392]	protein_coding	2.03547	2.56859e-08
ENSG00000101255	TRIB3	20	+	362835	397559	tribbles pseudokinase 3 [Source:HGNC Symbol;Acc:HGNC:16228]	protein_coding	2.03472	8.73521e-19
ENSG00000146530	VWDE	7	-	12330885	12403941	von Willebrand factor D and EGF domains [Source:HGNC Symbol;Acc:HGNC:21897]	protein_coding	2.03437	1.90665e-09
ENSG00000175906	ARL4D	17	+	43398993	43401137	ADP ribosylation factor like GTPase 4D [Source:HGNC Symbol;Acc:HGNC:656]	protein_coding	2.03313	0
ENSG00000187554	TLR5	1	-	223109404	223143248	toll like receptor 5 [Source:HGNC Symbol;Acc:HGNC:11851]	protein_coding	2.03202	2.84868e-45
ENSG00000255769	GOLGA2P10	15	-	82472993	82513950	GOLGA2 pseudogene 10 [Source:HGNC Symbol;Acc:HGNC:26229]	transcribed_unprocessed_pseudogene	2.03109	1.07461e-187
ENSG00000135838	NPL	1	+	182789293	182830384	N-acetylneuraminate pyruvate lyase [Source:HGNC Symbol;Acc:HGNC:16781]	protein_coding	2.03076	2.05208e-148
ENSG00000198142	SOWAHC	2	+	109614364	109618990	sosondowah ankyrin repeat domain family member C [Source:HGNC Symbol;Acc:HGNC:26149]	protein_coding	2.02994	3.35616e-123
ENSG00000107104	KANK1	9	+	470291	746106	KN motif and ankyrin repeat domains 1 [Source:HGNC Symbol;Acc:HGNC:19309]	protein_coding	2.02911	1.16245e-264
ENSG00000186301	MST1P2	1	+	16645622	16650289	macrophage stimulating 1 pseudogene 2 [Source:HGNC Symbol;Acc:HGNC:7383]	unprocessed_pseudogene	2.0285	5.14857e-19
ENSG00000242366	UGT1A8	2	+	233617645	233773310	UDP glucuronosyltransferase family 1 member A8 [Source:HGNC Symbol;Acc:HGNC:12540]	protein_coding	2.02838	1.0628e-08
ENSG00000285188	AC008397.2	19	-	18207961	18255419	novel protein	protein_coding	2.02827	7.06566e-16
ENSG00000138798	EGF	4	+	109912883	110013766	epidermal growth factor [Source:HGNC Symbol;Acc:HGNC:3229]	protein_coding	2.02733	4.72698e-194
ENSG00000183044	ABAT	16	+	8674596	8784575	4-aminobutyrate aminotransferase [Source:HGNC Symbol;Acc:HGNC:23]	protein_coding	2.02673	2.94974e-91
ENSG00000101342	TLDC2	20	+	36876121	36894235	TBC/LysM-associated domain containing 2 [Source:HGNC Symbol;Acc:HGNC:16112]	protein_coding	2.02648	2.26251e-14
ENSG00000198455	ZXDB	X	+	57591652	57597545	zinc finger X-linked duplicated B [Source:HGNC Symbol;Acc:HGNC:13199]	protein_coding	2.026	1.04174e-50
ENSG00000168490	PHYHIP	8	-	22219703	22232101	phytanoyl-CoA 2-hydroxylase interacting protein [Source:HGNC Symbol;Acc:HGNC:16865]	protein_coding	2.02461	3.45739e-53
ENSG00000214654	B3GNT10	9	+	120792403	120799918	UDP-GlcNAc:betaGal beta-1,3-N-acetylglucosaminyltransferase 10 (putative) [Source:HGNC Symbol;Acc:HGNC:53652]	protein_coding	2.02378	6.21901e-13
ENSG00000124602	UNC5CL	6	-	41026895	41039221	unc-5 family C-terminal like [Source:HGNC Symbol;Acc:HGNC:21203]	protein_coding	2.02095	4.98159e-15
ENSG00000116991	SIPA1L2	1	-	232397965	232630571	signal induced proliferation associated 1 like 2 [Source:HGNC Symbol;Acc:HGNC:23800]	protein_coding	2.02086	2.45601e-171
ENSG00000134250	NOTCH2	1	-	119911553	120100779	notch receptor 2 [Source:HGNC Symbol;Acc:HGNC:7882]	protein_coding	2.02085	0
ENSG00000162552	WNT4	1	-	22117313	22143969	Wnt family member 4 [Source:HGNC Symbol;Acc:HGNC:12783]	protein_coding	2.02022	5.24199e-231
ENSG00000086159	AQP6	12	+	49967194	49977139	aquaporin 6 [Source:HGNC Symbol;Acc:HGNC:639]	protein_coding	2.0194	3.43328e-22
ENSG00000123352	SPATS2	12	+	49366584	49527425	spermatogenesis associated serine rich 2 [Source:HGNC Symbol;Acc:HGNC:18650]	protein_coding	2.01678	8.03582e-85
ENSG00000214783	POLR2J4	7	-	43940895	44019175	RNA polymerase II subunit J4, pseudogene [Source:HGNC Symbol;Acc:HGNC:28195]	lncRNA	2.01656	1.10511e-136
ENSG00000163803	PLB1	2	+	28457145	28644142	phospholipase B1 [Source:HGNC Symbol;Acc:HGNC:30041]	protein_coding	2.01481	4.39181e-25
ENSG00000183734	ASCL2	11	-	2268495	2270952	achaete-scute family bHLH transcription factor 2 [Source:HGNC Symbol;Acc:HGNC:739]	protein_coding	2.01445	1.58309e-31
ENSG00000134982	APC	5	+	112707498	112846239	APC regulator of WNT signaling pathway [Source:HGNC Symbol;Acc:HGNC:583]	protein_coding	2.01349	1.90794e-110
ENSG00000156650	KAT6B	10	+	74824927	75032624	lysine acetyltransferase 6B [Source:HGNC Symbol;Acc:HGNC:17582]	protein_coding	2.01273	3.6164e-79
ENSG00000165655	ZNF503	10	-	75397830	75401764	zinc finger protein 503 [Source:HGNC Symbol;Acc:HGNC:23589]	protein_coding	2.01024	2.97699e-76
ENSG00000075643	MOCOS	18	+	36187497	36272157	molybdenum cofactor sulfurase [Source:HGNC Symbol;Acc:HGNC:18234]	protein_coding	2.01018	1.58264e-75
ENSG00000107736	CDH23	10	+	71396920	71815947	cadherin related 23 [Source:HGNC Symbol;Acc:HGNC:13733]	protein_coding	2.0077	3.8691e-10
ENSG00000134532	SOX5	12	-	23529504	24562544	SRY-box transcription factor 5 [Source:HGNC Symbol;Acc:HGNC:11201]	protein_coding	2.00364	1.87622e-25
ENSG00000171345	KRT19	17	-	41523617	41528308	keratin 19 [Source:HGNC Symbol;Acc:HGNC:6436]	protein_coding	2.00125	0
ENSG00000287966	AL590062.1	6	-	27018935	27020280	novel transcript	lncRNA	2.00112	4.3062e-06
ENSG00000125851	PCSK2	20	+	17226107	17484578	proprotein convertase subtilisin/kexin type 2 [Source:HGNC Symbol;Acc:HGNC:8744]	protein_coding	2.00102	4.1146e-37
ENSG00000138448	ITGAV	2	+	186590056	186680901	integrin subunit alpha V [Source:HGNC Symbol;Acc:HGNC:6150]	protein_coding	0.499708	0
ENSG00000172716	SLFN11	17	-	35350305	35373701	schlafen family member 11 [Source:HGNC Symbol;Acc:HGNC:26633]	protein_coding	0.499706	1.94881e-99
ENSG00000147174	GCNA	X	+	71578411	71613583	germ cell nuclear acidic peptidase [Source:HGNC Symbol;Acc:HGNC:15805]	protein_coding	0.499391	1.72759e-07
ENSG00000112309	B3GAT2	6	-	70856679	70957060	beta-1,3-glucuronyltransferase 2 [Source:HGNC Symbol;Acc:HGNC:922]	protein_coding	0.499315	3.12434e-06
ENSG00000121964	GTDC1	2	-	143938068	144332568	glycosyltransferase like domain containing 1 [Source:HGNC Symbol;Acc:HGNC:20887]	protein_coding	0.499267	1.4018e-28
ENSG00000249751	ECSCR	5	-	139448560	139462743	endothelial cell surface expressed chemotaxis and apoptosis regulator [Source:HGNC Symbol;Acc:HGNC:35454]	protein_coding	0.499181	1.20899e-60
ENSG00000175416	CLTB	5	-	176392455	176416569	clathrin light chain B [Source:HGNC Symbol;Acc:HGNC:2091]	protein_coding	0.498724	0
ENSG00000088899	LZTS3	20	-	3162617	3173592	leucine zipper tumor suppressor family member 3 [Source:HGNC Symbol;Acc:HGNC:30139]	protein_coding	0.498576	5.00578e-32
ENSG00000244274	DBNDD2	20	+	45406057	45410610	dysbindin domain containing 2 [Source:HGNC Symbol;Acc:HGNC:15881]	protein_coding	0.498556	5.61985e-89
ENSG00000099785	MARCHF2	19	+	8413270	8439017	membrane associated ring-CH-type finger 2 [Source:HGNC Symbol;Acc:HGNC:28038]	protein_coding	0.498214	2.58708e-68
ENSG00000154133	ROBO4	11	-	124883691	124898500	roundabout guidance receptor 4 [Source:HGNC Symbol;Acc:HGNC:17985]	protein_coding	0.497929	2.27994e-27
ENSG00000148154	UGCG	9	+	111896814	111935369	UDP-glucose ceramide glucosyltransferase [Source:HGNC Symbol;Acc:HGNC:12524]	protein_coding	0.497844	6.24466e-105
ENSG00000132465	JCHAIN	4	-	70655541	70681817	joining chain of multimeric IgA and IgM [Source:HGNC Symbol;Acc:HGNC:5713]	protein_coding	0.497765	0
ENSG00000110934	BIN2	12	-	51281038	51324668	bridging integrator 2 [Source:HGNC Symbol;Acc:HGNC:1053]	protein_coding	0.497717	6.29014e-17
ENSG00000111666	CHPT1	12	+	101696947	101744140	choline phosphotransferase 1 [Source:HGNC Symbol;Acc:HGNC:17852]	protein_coding	0.497684	5.31348e-28
ENSG00000164733	CTSB	8	-	11842524	11869448	cathepsin B [Source:HGNC Symbol;Acc:HGNC:2527]	protein_coding	0.497581	0
ENSG00000167754	KLK5	19	-	50943303	50953093	kallikrein related peptidase 5 [Source:HGNC Symbol;Acc:HGNC:6366]	protein_coding	0.497476	7.59978e-09
ENSG00000185201	IFITM2	11	+	307631	315272	interferon induced transmembrane protein 2 [Source:HGNC Symbol;Acc:HGNC:5413]	protein_coding	0.497452	1.48073e-178
ENSG00000198133	TMEM229B	14	-	67447084	67533739	transmembrane protein 229B [Source:HGNC Symbol;Acc:HGNC:20130]	protein_coding	0.497393	1.88323e-22
ENSG00000073712	FERMT2	14	-	52857268	52952435	fermitin family member 2 [Source:HGNC Symbol;Acc:HGNC:15767]	protein_coding	0.497362	5.28373e-80
ENSG00000254413	CHKB-CPT1B	22	-	50568869	50582965	CHKB-CPT1B readthrough (NMD candidate) [Source:HGNC Symbol;Acc:HGNC:41998]	protein_coding	0.497015	1.72487e-59
ENSG00000163817	SLC6A20	3	-	45755449	45796536	solute carrier family 6 member 20 [Source:HGNC Symbol;Acc:HGNC:30927]	protein_coding	0.496638	2.26215e-06
ENSG00000166780	BMERB1	16	+	15434475	15625028	bMERB domain containing 1 [Source:HGNC Symbol;Acc:HGNC:19213]	protein_coding	0.496507	2.41871e-37
ENSG00000254806	SYS1-DBNDD2	20	+	45363200	45410610	SYS1-DBNDD2 readthrough (NMD candidate) [Source:HGNC Symbol;Acc:HGNC:33535]	protein_coding	0.496344	6.98957e-09
ENSG00000232931	LINC00342	2	-	95807052	95835003	long intergenic non-protein coding RNA 342 [Source:HGNC Symbol;Acc:HGNC:42470]	lncRNA	0.496156	3.61123e-25
ENSG00000169026	SLC49A3	4	-	681829	689271	solute carrier family 49 member 3 [Source:HGNC Symbol;Acc:HGNC:26177]	protein_coding	0.495998	2.93981e-17
ENSG00000163491	NEK10	3	-	27110085	27369460	NIMA related kinase 10 [Source:HGNC Symbol;Acc:HGNC:18592]	protein_coding	0.495665	2.27685e-08
ENSG00000181195	PENK	8	-	56436674	56446671	proenkephalin [Source:HGNC Symbol;Acc:HGNC:8831]	protein_coding	0.495595	1.60787e-14
ENSG00000168938	PPIC	5	-	123023250	123036725	peptidylprolyl isomerase C [Source:HGNC Symbol;Acc:HGNC:9256]	protein_coding	0.494817	4.41955e-189
ENSG00000085741	WNT11	11	-	76186325	76210736	Wnt family member 11 [Source:HGNC Symbol;Acc:HGNC:12776]	protein_coding	0.494744	4.20828e-12
ENSG00000272667	AC012306.2	2	+	127886556	127887185	novel transcript	lncRNA	0.494457	9.98177e-07
ENSG00000146540	C7orf50	7	-	996986	1138260	chromosome 7 open reading frame 50 [Source:HGNC Symbol;Acc:HGNC:22421]	protein_coding	0.494365	1.30573e-69
ENSG00000164574	GALNT10	5	+	154190730	154420984	polypeptide N-acetylgalactosaminyltransferase 10 [Source:HGNC Symbol;Acc:HGNC:19873]	protein_coding	0.494188	3.11781e-97
ENSG00000138172	CALHM2	10	-	103446786	103452402	calcium homeostasis modulator family member 2 [Source:HGNC Symbol;Acc:HGNC:23493]	protein_coding	0.494167	4.28005e-70
ENSG00000138111	MFSD13A	10	+	102461395	102477045	major facilitator superfamily domain containing 13A [Source:HGNC Symbol;Acc:HGNC:26196]	protein_coding	0.494004	1.49172e-16
ENSG00000105122	RASAL3	19	-	15451624	15464544	RAS protein activator like 3 [Source:HGNC Symbol;Acc:HGNC:26129]	protein_coding	0.493494	3.96076e-18
ENSG00000167123	CERCAM	9	+	128411751	128437351	cerebral endothelial cell adhesion molecule [Source:HGNC Symbol;Acc:HGNC:23723]	protein_coding	0.493387	6.82344e-78
ENSG00000198805	PNP	14	+	20468954	20477089	purine nucleoside phosphorylase [Source:HGNC Symbol;Acc:HGNC:7892]	protein_coding	0.493317	3.1069e-69
ENSG00000155926	SLA	8	-	133036728	133102912	Src like adaptor [Source:HGNC Symbol;Acc:HGNC:10902]	protein_coding	0.493224	1.47802e-28
ENSG00000141480	ARRB2	17	+	4710596	4721499	arrestin beta 2 [Source:HGNC Symbol;Acc:HGNC:712]	protein_coding	0.492946	9.25853e-86
ENSG00000174004	NRROS	3	+	196639694	196662004	negative regulator of reactive oxygen species [Source:HGNC Symbol;Acc:HGNC:24613]	protein_coding	0.492877	3.52264e-11
ENSG00000131055	COX4I2	20	+	31637912	31645006	cytochrome c oxidase subunit 4I2 [Source:HGNC Symbol;Acc:HGNC:16232]	protein_coding	0.492637	5.96008e-07
ENSG00000182809	CRIP2	14	+	105472962	105480162	cysteine rich protein 2 [Source:HGNC Symbol;Acc:HGNC:2361]	protein_coding	0.492447	7.23003e-299
ENSG00000041357	PSMA4	15	+	78540405	78552417	proteasome 20S subunit alpha 4 [Source:HGNC Symbol;Acc:HGNC:9533]	protein_coding	0.491797	6.88692e-116
ENSG00000118946	PCDH17	13	+	57631744	57729311	protocadherin 17 [Source:HGNC Symbol;Acc:HGNC:14267]	protein_coding	0.491591	2.18664e-11
ENSG00000135047	CTSL	9	+	87726109	87731469	cathepsin L [Source:HGNC Symbol;Acc:HGNC:2537]	protein_coding	0.491254	1.47276e-287
ENSG00000204588	LINC01123	2	+	109987063	109996140	long intergenic non-protein coding RNA 1123 [Source:HGNC Symbol;Acc:HGNC:49269]	lncRNA	0.490912	9.14978e-09
ENSG00000149781	FERMT3	11	+	64206678	64223886	fermitin family member 3 [Source:HGNC Symbol;Acc:HGNC:23151]	protein_coding	0.490813	9.16989e-32
ENSG00000186847	KRT14	17	-	41582279	41586895	keratin 14 [Source:HGNC Symbol;Acc:HGNC:6416]	protein_coding	0.490528	0
ENSG00000198643	FAM3D	3	-	58633946	58666834	FAM3 metabolism regulating signaling molecule D [Source:HGNC Symbol;Acc:HGNC:18665]	protein_coding	0.490376	4.48277e-140
ENSG00000158488	CD1E	1	+	158353696	158357553	CD1e molecule [Source:HGNC Symbol;Acc:HGNC:1638]	protein_coding	0.490188	7.51379e-17
ENSG00000101825	MXRA5	X	-	3308565	3346652	matrix remodeling associated 5 [Source:HGNC Symbol;Acc:HGNC:7539]	protein_coding	0.490098	2.39465e-268
ENSG00000102575	ACP5	19	-	11574660	11579008	acid phosphatase 5, tartrate resistant [Source:HGNC Symbol;Acc:HGNC:124]	protein_coding	0.490093	1.11698e-79
ENSG00000163508	EOMES	3	-	27715949	27722711	eomesodermin [Source:HGNC Symbol;Acc:HGNC:3372]	protein_coding	0.489706	4.06117e-12
ENSG00000170959	DCDC1	11	-	30830369	31369810	doublecortin domain containing 1 [Source:HGNC Symbol;Acc:HGNC:20625]	protein_coding	0.489512	8.66129e-76
ENSG00000105329	TGFB1	19	-	41301587	41353922	transforming growth factor beta 1 [Source:HGNC Symbol;Acc:HGNC:11766]	protein_coding	0.489459	1.79461e-97
ENSG00000164867	NOS3	7	+	150991017	151014588	nitric oxide synthase 3 [Source:HGNC Symbol;Acc:HGNC:7876]	protein_coding	0.489426	6.36501e-15
ENSG00000137869	CYP19A1	15	-	51208057	51338601	cytochrome P450 family 19 subfamily A member 1 [Source:HGNC Symbol;Acc:HGNC:2594]	protein_coding	0.488431	2.9346e-09
ENSG00000126246	IGFLR1	19	-	35738801	35742453	IGF like family receptor 1 [Source:HGNC Symbol;Acc:HGNC:23620]	protein_coding	0.488399	4.50014e-28
ENSG00000178573	MAF	16	-	79585843	79600737	MAF bZIP transcription factor [Source:HGNC Symbol;Acc:HGNC:6776]	protein_coding	0.488381	1.02338e-139
ENSG00000101439	CST3	20	-	23626706	23638473	cystatin C [Source:HGNC Symbol;Acc:HGNC:2475]	protein_coding	0.488354	0
ENSG00000285108	AC103718.1	8	-	129685401	129723023	novel transcript	lncRNA	0.488233	3.19035e-13
ENSG00000268001	CARD8-AS1	19	+	48255675	48258199	CARD8 antisense RNA 1 [Source:HGNC Symbol;Acc:HGNC:51408]	lncRNA	0.488137	7.22727e-16
ENSG00000019102	VSIG2	11	-	124747474	124752255	V-set and immunoglobulin domain containing 2 [Source:HGNC Symbol;Acc:HGNC:17149]	protein_coding	0.487837	6.67121e-63
ENSG00000165948	IFI27L1	14	+	94081301	94103846	interferon alpha inducible protein 27 like 1 [Source:HGNC Symbol;Acc:HGNC:19754]	protein_coding	0.487618	5.93745e-31
ENSG00000175445	LPL	8	+	19901717	19967259	lipoprotein lipase [Source:HGNC Symbol;Acc:HGNC:6677]	protein_coding	0.487485	6.95271e-26
ENSG00000065308	TRAM2	6	-	52497408	52577060	translocation associated membrane protein 2 [Source:HGNC Symbol;Acc:HGNC:16855]	protein_coding	0.48745	2.41798e-66
ENSG00000115350	POLE4	2	+	74958643	74970128	DNA polymerase epsilon 4, accessory subunit [Source:HGNC Symbol;Acc:HGNC:18755]	protein_coding	0.487225	2.57573e-77
ENSG00000081052	COL4A4	2	-	227002714	227164453	collagen type IV alpha 4 chain [Source:HGNC Symbol;Acc:HGNC:2206]	protein_coding	0.487072	1.59515e-23
ENSG00000242616	GNG10	9	+	111661605	111670226	G protein subunit gamma 10 [Source:HGNC Symbol;Acc:HGNC:4402]	protein_coding	0.486858	3.82407e-93
ENSG00000159761	C16orf86	16	+	67666814	67668757	chromosome 16 open reading frame 86 [Source:HGNC Symbol;Acc:HGNC:33755]	protein_coding	0.486797	1.1257e-09
ENSG00000115526	CHST10	2	-	100391860	100417668	carbohydrate sulfotransferase 10 [Source:HGNC Symbol;Acc:HGNC:19650]	protein_coding	0.486433	1.70019e-16
ENSG00000241322	CDRT1	17	-	15565483	15619704	CMT1A duplicated region transcript 1 [Source:HGNC Symbol;Acc:HGNC:14379]	protein_coding	0.485931	1.12496e-45
ENSG00000112139	MDGA1	6	-	37630679	37699306	MAM domain containing glycosylphosphatidylinositol anchor 1 [Source:HGNC Symbol;Acc:HGNC:19267]	protein_coding	0.485348	6.44225e-07
ENSG00000130881	LRP3	19	+	33177603	33208864	LDL receptor related protein 3 [Source:HGNC Symbol;Acc:HGNC:6695]	protein_coding	0.48528	1.1295e-69
ENSG00000141933	TPGS1	19	+	507497	519654	tubulin polyglutamylase complex subunit 1 [Source:HGNC Symbol;Acc:HGNC:25058]	protein_coding	0.484919	9.46432e-39
ENSG00000182287	AP1S2	X	-	15825806	15854931	adaptor related protein complex 1 subunit sigma 2 [Source:HGNC Symbol;Acc:HGNC:560]	protein_coding	0.484765	1.58337e-107
ENSG00000163219	ARHGAP25	2	+	68679601	68826833	Rho GTPase activating protein 25 [Source:HGNC Symbol;Acc:HGNC:28951]	protein_coding	0.484215	1.65975e-31
ENSG00000143320	CRABP2	1	-	156699606	156705816	cellular retinoic acid binding protein 2 [Source:HGNC Symbol;Acc:HGNC:2339]	protein_coding	0.483896	2.45423e-166
ENSG00000100003	SEC14L2	22	+	30396941	30425303	SEC14 like lipid binding 2 [Source:HGNC Symbol;Acc:HGNC:10699]	protein_coding	0.483004	6.27302e-19
ENSG00000163145	C1QTNF7	4	+	15339818	15446167	C1q and TNF related 7 [Source:HGNC Symbol;Acc:HGNC:14342]	protein_coding	0.482972	9.11484e-96
ENSG00000104894	CD37	19	+	49335171	49343335	CD37 molecule [Source:HGNC Symbol;Acc:HGNC:1666]	protein_coding	0.482809	3.27991e-28
ENSG00000226419	SLC16A1-AS1	1	+	112956415	113047055	SLC16A1 antisense RNA 1 [Source:HGNC Symbol;Acc:HGNC:49445]	lncRNA	0.482685	9.09908e-09
ENSG00000106976	DNM1	9	+	128191655	128255248	dynamin 1 [Source:HGNC Symbol;Acc:HGNC:2972]	protein_coding	0.482557	1.3265e-28
ENSG00000139832	RAB20	13	-	110523066	110561722	RAB20, member RAS oncogene family [Source:HGNC Symbol;Acc:HGNC:18260]	protein_coding	0.482515	3.47392e-15
ENSG00000229619	MBNL1-AS1	3	-	152245262	152269557	MBNL1 antisense RNA 1 [Source:HGNC Symbol;Acc:HGNC:44584]	lncRNA	0.482293	1.13365e-08
ENSG00000163710	PCOLCE2	3	-	142815922	142889206	procollagen C-endopeptidase enhancer 2 [Source:HGNC Symbol;Acc:HGNC:8739]	protein_coding	0.482276	2.69753e-47
ENSG00000136167	LCP1	13	-	46125920	46211871	lymphocyte cytosolic protein 1 [Source:HGNC Symbol;Acc:HGNC:6528]	protein_coding	0.482243	1.5403e-192
ENSG00000166510	CCDC68	18	-	54901509	54959461	coiled-coil domain containing 68 [Source:HGNC Symbol;Acc:HGNC:24350]	protein_coding	0.48221	2.61734e-07
ENSG00000011422	PLAUR	19	-	43646095	43670547	plasminogen activator, urokinase receptor [Source:HGNC Symbol;Acc:HGNC:9053]	protein_coding	0.482064	2.66448e-33
ENSG00000267107	PCAT19	19	-	41449520	41501223	prostate cancer associated transcript 19 [Source:HGNC Symbol;Acc:HGNC:49593]	lncRNA	0.48198	5.12838e-28
ENSG00000198053	SIRPA	20	+	1894167	1940592	signal regulatory protein alpha [Source:HGNC Symbol;Acc:HGNC:9662]	protein_coding	0.481973	6.90335e-90
ENSG00000165304	MELK	9	+	36572862	36677683	maternal embryonic leucine zipper kinase [Source:HGNC Symbol;Acc:HGNC:16870]	protein_coding	0.481797	3.01499e-07
ENSG00000183496	MEX3B	15	-	82041778	82046119	mex-3 RNA binding family member B [Source:HGNC Symbol;Acc:HGNC:25297]	protein_coding	0.481598	4.43872e-07
ENSG00000103066	PLA2G15	16	+	68245304	68261058	phospholipase A2 group XV [Source:HGNC Symbol;Acc:HGNC:17163]	protein_coding	0.48159	5.00228e-45
ENSG00000147912	FBXO10	9	-	37510892	37576380	F-box protein 10 [Source:HGNC Symbol;Acc:HGNC:13589]	protein_coding	0.481404	7.16675e-15
ENSG00000137509	PRCP	11	-	82822936	82970584	prolylcarboxypeptidase [Source:HGNC Symbol;Acc:HGNC:9344]	protein_coding	0.481272	1.80459e-293
ENSG00000115935	WIPF1	2	-	174559572	174682916	WAS/WASL interacting protein family member 1 [Source:HGNC Symbol;Acc:HGNC:12736]	protein_coding	0.481127	3.99208e-128
ENSG00000180573	H2AC6	6	+	26124145	26139116	H2A clustered histone 6 [Source:HGNC Symbol;Acc:HGNC:4733]	protein_coding	0.481002	1.81231e-81
ENSG00000240694	PNMA2	8	-	26504701	26514092	PNMA family member 2 [Source:HGNC Symbol;Acc:HGNC:9159]	protein_coding	0.480907	1.24779e-09
ENSG00000130475	FCHO1	19	+	17747718	17788568	FCH and mu domain containing endocytic adaptor 1 [Source:HGNC Symbol;Acc:HGNC:29002]	protein_coding	0.480801	4.23732e-07
ENSG00000004468	CD38	4	+	15778275	15853232	CD38 molecule [Source:HGNC Symbol;Acc:HGNC:1667]	protein_coding	0.479923	1.17556e-47
ENSG00000203485	INF2	14	+	104681146	104722535	inverted formin 2 [Source:HGNC Symbol;Acc:HGNC:23791]	protein_coding	0.479907	6.22881e-71
ENSG00000004776	HSPB6	19	-	35754566	35758079	heat shock protein family B (small) member 6 [Source:HGNC Symbol;Acc:HGNC:26511]	protein_coding	0.479816	2.51705e-14
ENSG00000176845	METRNL	17	+	83079609	83095122	meteorin like, glial cell differentiation regulator [Source:HGNC Symbol;Acc:HGNC:27584]	protein_coding	0.479813	1.39936e-77
ENSG00000239672	NME1	17	+	51153559	51162428	NME/NM23 nucleoside diphosphate kinase 1 [Source:HGNC Symbol;Acc:HGNC:7849]	protein_coding	0.479625	1.76504e-143
ENSG00000135723	FHOD1	16	-	67229387	67247481	formin homology 2 domain containing 1 [Source:HGNC Symbol;Acc:HGNC:17905]	protein_coding	0.479417	2.57523e-30
ENSG00000166147	FBN1	15	-	48408313	48645721	fibrillin 1 [Source:HGNC Symbol;Acc:HGNC:3603]	protein_coding	0.479302	0
ENSG00000184730	APOBR	16	+	28494643	28498970	apolipoprotein B receptor [Source:HGNC Symbol;Acc:HGNC:24087]	protein_coding	0.479297	8.64358e-21
ENSG00000170667	RASA4B	7	-	102479976	102517777	RAS p21 protein activator 4B [Source:HGNC Symbol;Acc:HGNC:35202]	protein_coding	0.479002	1.29377e-08
ENSG00000129007	CALML4	15	-	68190705	68206110	calmodulin like 4 [Source:HGNC Symbol;Acc:HGNC:18445]	protein_coding	0.478906	2.44724e-23
ENSG00000108798	ABI3	17	+	49210411	49223225	ABI family member 3 [Source:HGNC Symbol;Acc:HGNC:29859]	protein_coding	0.47881	2.36368e-17
ENSG00000116157	GPX7	1	+	52602371	52609051	glutathione peroxidase 7 [Source:HGNC Symbol;Acc:HGNC:4559]	protein_coding	0.478685	4.34081e-34
ENSG00000177096	PHETA2	22	+	42074248	42079438	PH domain containing endocytic trafficking adaptor 2 [Source:HGNC Symbol;Acc:HGNC:27161]	protein_coding	0.478372	4.38369e-48
ENSG00000183578	TNFAIP8L3	15	-	51056598	51105276	TNF alpha induced protein 8 like 3 [Source:HGNC Symbol;Acc:HGNC:20620]	protein_coding	0.478324	1.07279e-20
ENSG00000162997	PRORSD1P	2	+	55282319	55284522	prolyl-tRNA synthetase associated domain containing 1, pseudogene [Source:HGNC Symbol;Acc:HGNC:34379]	transcribed_unitary_pseudogene	0.477702	3.81292e-06
ENSG00000005810	MYCBP2	13	-	77044657	77327094	MYC binding protein 2 [Source:HGNC Symbol;Acc:HGNC:23386]	protein_coding	0.477639	1.19965e-143
ENSG00000176438	SYNE3	14	-	95407266	95475836	spectrin repeat containing nuclear envelope family member 3 [Source:HGNC Symbol;Acc:HGNC:19861]	protein_coding	0.47713	1.93547e-49
ENSG00000256870	SLC5A8	12	-	101155493	101210238	solute carrier family 5 member 8 [Source:HGNC Symbol;Acc:HGNC:19119]	protein_coding	0.476967	9.43931e-09
ENSG00000184113	CLDN5	22	-	19523024	19527545	claudin 5 [Source:HGNC Symbol;Acc:HGNC:2047]	protein_coding	0.476941	1.60204e-32
ENSG00000152661	GJA1	6	+	121435595	121449727	gap junction protein alpha 1 [Source:HGNC Symbol;Acc:HGNC:4274]	protein_coding	0.4769	0
ENSG00000205413	SAMD9	7	-	93099513	93118023	sterile alpha motif domain containing 9 [Source:HGNC Symbol;Acc:HGNC:1348]	protein_coding	0.47673	1.9472e-96
ENSG00000255330	AL096711.2	6	-	127438406	127519001	novel protein	protein_coding	0.476612	1.16491e-07
ENSG00000169031	COL4A3	2	+	227164624	227314792	collagen type IV alpha 3 chain [Source:HGNC Symbol;Acc:HGNC:2204]	protein_coding	0.475977	2.46697e-09
ENSG00000168071	CCDC88B	11	+	64340204	64357534	coiled-coil domain containing 88B [Source:HGNC Symbol;Acc:HGNC:26757]	protein_coding	0.475888	4.53532e-53
ENSG00000172794	RAB37	17	+	74670578	74747335	RAB37, member RAS oncogene family [Source:HGNC Symbol;Acc:HGNC:30268]	protein_coding	0.475834	1.37809e-31
ENSG00000260778	AC009065.4	16	+	2268155	2273418	novel transcript	lncRNA	0.475683	3.526e-12
ENSG00000066735	KIF26A	14	+	104138723	104180894	kinesin family member 26A [Source:HGNC Symbol;Acc:HGNC:20226]	protein_coding	0.474529	9.81483e-24
ENSG00000197632	SERPINB2	18	+	63871692	63903888	serpin family B member 2 [Source:HGNC Symbol;Acc:HGNC:8584]	protein_coding	0.473903	1.82527e-44
ENSG00000168032	ENTPD3	3	+	40387184	40428744	ectonucleoside triphosphate diphosphohydrolase 3 [Source:HGNC Symbol;Acc:HGNC:3365]	protein_coding	0.473733	2.91391e-22
ENSG00000128709	HOXD9	2	+	176122719	176124937	homeobox D9 [Source:HGNC Symbol;Acc:HGNC:5140]	protein_coding	0.472927	2.51748e-20
ENSG00000103241	FOXF1	16	+	86510527	86515422	forkhead box F1 [Source:HGNC Symbol;Acc:HGNC:3809]	protein_coding	0.472848	9.31881e-10
ENSG00000177556	ATOX1	5	-	151742316	151772532	antioxidant 1 copper chaperone [Source:HGNC Symbol;Acc:HGNC:798]	protein_coding	0.472789	1.17443e-41
ENSG00000186871	ERCC6L	X	-	72204657	72239027	ERCC excision repair 6 like, spindle assembly checkpoint helicase [Source:HGNC Symbol;Acc:HGNC:20794]	protein_coding	0.472725	5.33049e-07
ENSG00000141429	GALNT1	18	+	35581117	35711834	polypeptide N-acetylgalactosaminyltransferase 1 [Source:HGNC Symbol;Acc:HGNC:4123]	protein_coding	0.472455	0
ENSG00000198855	FICD	12	+	108515277	108525837	FIC domain protein adenylyltransferase [Source:HGNC Symbol;Acc:HGNC:18416]	protein_coding	0.472331	4.32504e-21
ENSG00000143333	RGS16	1	-	182598623	182604389	regulator of G protein signaling 16 [Source:HGNC Symbol;Acc:HGNC:9997]	protein_coding	0.472277	9.04624e-33
ENSG00000153294	ADGRF4	6	+	47685864	47722021	adhesion G protein-coupled receptor F4 [Source:HGNC Symbol;Acc:HGNC:19011]	protein_coding	0.472261	9.93027e-116
ENSG00000182463	TSHZ2	20	+	52972358	53495330	teashirt zinc finger homeobox 2 [Source:HGNC Symbol;Acc:HGNC:13010]	protein_coding	0.471948	5.28115e-72
ENSG00000102445	RUBCNL	13	-	46334681	46438190	rubicon like autophagy enhancer [Source:HGNC Symbol;Acc:HGNC:20420]	protein_coding	0.471813	7.5768e-22
ENSG00000173517	PEAK1	15	-	77100656	77420144	pseudopodium enriched atypical kinase 1 [Source:HGNC Symbol;Acc:HGNC:29431]	protein_coding	0.470349	1.73521e-53
ENSG00000184922	FMNL1	17	+	45221444	45247319	formin like 1 [Source:HGNC Symbol;Acc:HGNC:1212]	protein_coding	0.470158	2.11357e-64
ENSG00000119121	TRPM6	9	-	74722495	74888094	transient receptor potential cation channel subfamily M member 6 [Source:HGNC Symbol;Acc:HGNC:17995]	protein_coding	0.470023	1.78009e-13
ENSG00000155465	SLC7A7	14	-	22773222	22829820	solute carrier family 7 member 7 [Source:HGNC Symbol;Acc:HGNC:11065]	protein_coding	0.469877	2.81612e-23
ENSG00000167994	RAB3IL1	11	-	61897301	61920269	RAB3A interacting protein like 1 [Source:HGNC Symbol;Acc:HGNC:9780]	protein_coding	0.469547	3.08373e-32
ENSG00000260669	AL096870.2	14	-	24209646	24215987	novel transcript	lncRNA	0.469424	2.55911e-25
ENSG00000173727	AP000769.1	11	+	65455258	65466720	Finkel-Biskis-Reilly murine sarcoma virus (FBR-MuSV) ubiquitously expressed (FAU) pseudogene	transcribed_unprocessed_pseudogene	0.46933	3.66483e-12
ENSG00000155380	SLC16A1	1	-	112911847	112957013	solute carrier family 16 member 1 [Source:HGNC Symbol;Acc:HGNC:10922]	protein_coding	0.469129	2.29179e-43
ENSG00000168386	FILIP1L	3	-	99830141	100114513	filamin A interacting protein 1 like [Source:HGNC Symbol;Acc:HGNC:24589]	protein_coding	0.468844	4.60704e-165
ENSG00000261068	AL512274.1	6	-	42092233	42094259	novel transcript	lncRNA	0.468342	4.35975e-27
ENSG00000015285	WAS	X	+	48676596	48691427	WASP actin nucleation promoting factor [Source:HGNC Symbol;Acc:HGNC:12731]	protein_coding	0.468022	2.23818e-19
ENSG00000120156	TEK	9	+	27109141	27230174	TEK receptor tyrosine kinase [Source:HGNC Symbol;Acc:HGNC:11724]	protein_coding	0.46771	2.83576e-51
ENSG00000137692	DCUN1D5	11	-	103050686	103092194	defective in cullin neddylation 1 domain containing 5 [Source:HGNC Symbol;Acc:HGNC:28409]	protein_coding	0.467071	1.61434e-12
ENSG00000150556	LYPD6B	2	+	149038107	149215262	LY6/PLAUR domain containing 6B [Source:HGNC Symbol;Acc:HGNC:27018]	protein_coding	0.466764	1.04779e-45
ENSG00000169504	CLIC4	1	+	24745382	24844321	chloride intracellular channel 4 [Source:HGNC Symbol;Acc:HGNC:13518]	protein_coding	0.466616	0
ENSG00000157578	LCA5L	21	-	39405844	39445805	lebercilin LCA5 like [Source:HGNC Symbol;Acc:HGNC:1255]	protein_coding	0.466239	2.27754e-09
ENSG00000176907	TCIM	8	+	40153482	40155310	transcriptional and immune response regulator [Source:HGNC Symbol;Acc:HGNC:1357]	protein_coding	0.465973	1.10876e-35
ENSG00000183742	MACC1	7	-	20134655	20217404	MET transcriptional regulator MACC1 [Source:HGNC Symbol;Acc:HGNC:30215]	protein_coding	0.465957	9.48817e-81
ENSG00000092098	RNF31	14	+	24146683	24160660	ring finger protein 31 [Source:HGNC Symbol;Acc:HGNC:16031]	protein_coding	0.465563	2.45166e-30
ENSG00000203727	SAMD5	6	+	147508690	147737547	sterile alpha motif domain containing 5 [Source:HGNC Symbol;Acc:HGNC:21180]	protein_coding	0.465376	1.1581e-13
ENSG00000143851	PTPN7	1	-	202147013	202161588	protein tyrosine phosphatase non-receptor type 7 [Source:HGNC Symbol;Acc:HGNC:9659]	protein_coding	0.46524	9.30955e-23
ENSG00000214575	CPEB1	15	-	82543201	82648861	cytoplasmic polyadenylation element binding protein 1 [Source:HGNC Symbol;Acc:HGNC:21744]	protein_coding	0.465131	3.65956e-10
ENSG00000166813	KIF7	15	-	89608789	89655467	kinesin family member 7 [Source:HGNC Symbol;Acc:HGNC:30497]	protein_coding	0.465017	6.45554e-17
ENSG00000163704	PRRT3	3	-	9945542	9952408	proline rich transmembrane protein 3 [Source:HGNC Symbol;Acc:HGNC:26591]	protein_coding	0.46495	2.64131e-10
ENSG00000136425	CIB2	15	-	78104606	78131535	calcium and integrin binding family member 2 [Source:HGNC Symbol;Acc:HGNC:24579]	protein_coding	0.464897	1.97032e-10
ENSG00000166352	IFTAP	11	+	36594493	36659290	intraflagellar transport associated protein [Source:HGNC Symbol;Acc:HGNC:25142]	protein_coding	0.464712	3.64363e-29
ENSG00000069011	PITX1	5	-	135027734	135034813	paired like homeodomain 1 [Source:HGNC Symbol;Acc:HGNC:9004]	protein_coding	0.464632	8.84983e-83
ENSG00000132840	BHMT2	5	+	79069767	79090069	betaine--homocysteine S-methyltransferase 2 [Source:HGNC Symbol;Acc:HGNC:1048]	protein_coding	0.464607	1.25787e-14
ENSG00000164825	DEFB1	8	-	6870592	6877936	defensin beta 1 [Source:HGNC Symbol;Acc:HGNC:2766]	protein_coding	0.46409	1.08712e-114
ENSG00000215374	FAM66B	8	-	7298744	7355359	family with sequence similarity 66 member B [Source:HGNC Symbol;Acc:HGNC:28890]	lncRNA	0.464035	3.96736e-06
ENSG00000132003	ZSWIM4	19	+	13795460	13832230	zinc finger SWIM-type containing 4 [Source:HGNC Symbol;Acc:HGNC:25704]	protein_coding	0.464012	1.12665e-11
ENSG00000268713	AC005261.3	19	+	57261354	57262738	novel transcript	lncRNA	0.463875	8.73315e-07
ENSG00000124126	PREX1	20	-	48624252	48827999	phosphatidylinositol-3,4,5-trisphosphate dependent Rac exchange factor 1 [Source:HGNC Symbol;Acc:HGNC:32594]	protein_coding	0.463603	1.95447e-46
ENSG00000123080	CDKN2C	1	+	50960745	50974634	cyclin dependent kinase inhibitor 2C [Source:HGNC Symbol;Acc:HGNC:1789]	protein_coding	0.463363	1.13113e-61
ENSG00000094975	SUCO	1	+	172532349	172611833	SUN domain containing ossification factor [Source:HGNC Symbol;Acc:HGNC:1240]	protein_coding	0.46311	0
ENSG00000133466	C1QTNF6	22	-	37180166	37199385	C1q and TNF related 6 [Source:HGNC Symbol;Acc:HGNC:14343]	protein_coding	0.462945	6.40837e-28
ENSG00000125772	GPCPD1	20	-	5544439	5611006	glycerophosphocholine phosphodiesterase 1 [Source:HGNC Symbol;Acc:HGNC:26957]	protein_coding	0.462729	8.7455e-308
ENSG00000214736	TOMM6	6	+	41787662	41789898	translocase of outer mitochondrial membrane 6 [Source:HGNC Symbol;Acc:HGNC:34528]	protein_coding	0.462411	2.60841e-07
ENSG00000123496	IL13RA2	X	-	115003975	115019977	interleukin 13 receptor subunit alpha 2 [Source:HGNC Symbol;Acc:HGNC:5975]	protein_coding	0.462271	1.74968e-12
ENSG00000197696	NMB	15	-	84655129	84658563	neuromedin B [Source:HGNC Symbol;Acc:HGNC:7842]	protein_coding	0.461865	5.17335e-13
ENSG00000258947	TUBB3	16	+	89921392	89938761	tubulin beta 3 class III [Source:HGNC Symbol;Acc:HGNC:20772]	protein_coding	0.461795	9.69439e-30
ENSG00000135547	HEY2	6	+	125747664	125761269	hes related family bHLH transcription factor with YRPW motif 2 [Source:HGNC Symbol;Acc:HGNC:4881]	protein_coding	0.46179	6.35918e-24
ENSG00000185532	PRKG1	10	+	50990888	52298423	protein kinase cGMP-dependent 1 [Source:HGNC Symbol;Acc:HGNC:9414]	protein_coding	0.461617	5.64212e-32
ENSG00000161638	ITGA5	12	-	54395261	54419266	integrin subunit alpha 5 [Source:HGNC Symbol;Acc:HGNC:6141]	protein_coding	0.461529	2.70892e-110
ENSG00000117600	PLPPR4	1	+	99263953	99309590	phospholipid phosphatase related 4 [Source:HGNC Symbol;Acc:HGNC:23496]	protein_coding	0.461337	2.94982e-37
ENSG00000140945	CDH13	16	+	82626965	83800640	cadherin 13 [Source:HGNC Symbol;Acc:HGNC:1753]	protein_coding	0.46129	1.28866e-122
ENSG00000237438	CECR7	22	+	17036570	17060825	cat eye syndrome chromosome region, candidate 7 [Source:HGNC Symbol;Acc:HGNC:1845]	transcribed_unprocessed_pseudogene	0.461286	1.60966e-09
ENSG00000223561	AC005165.1	7	-	25593304	25751032	novel transcript	lncRNA	0.461092	3.42713e-21
ENSG00000149534	MS4A2	11	+	60088261	60098467	membrane spanning 4-domains A2 [Source:HGNC Symbol;Acc:HGNC:7316]	protein_coding	0.460884	1.45799e-32
ENSG00000184709	LRRC26	9	-	137168758	137170051	leucine rich repeat containing 26 [Source:HGNC Symbol;Acc:HGNC:31409]	protein_coding	0.460703	2.22073e-10
ENSG00000065600	PACC1	1	-	212363928	212414901	proton activated chloride channel 1 [Source:HGNC Symbol;Acc:HGNC:25593]	protein_coding	0.460529	3.81155e-30
ENSG00000186998	EMID1	22	+	29205896	29259597	EMI domain containing 1 [Source:HGNC Symbol;Acc:HGNC:18036]	protein_coding	0.46	2.6772e-11
ENSG00000164294	GPX8	5	+	55160167	55167297	glutathione peroxidase 8 (putative) [Source:HGNC Symbol;Acc:HGNC:33100]	protein_coding	0.459086	6.07452e-142
ENSG00000189159	JPT1	17	-	75135248	75168281	Jupiter microtubule associated homolog 1 [Source:HGNC Symbol;Acc:HGNC:14569]	protein_coding	0.45876	2.58555e-121
ENSG00000150048	CLEC1A	12	-	10069554	10111627	C-type lectin domain family 1 member A [Source:HGNC Symbol;Acc:HGNC:24355]	protein_coding	0.458683	3.64491e-22
ENSG00000167244	IGF2	11	-	2129112	2141238	insulin like growth factor 2 [Source:HGNC Symbol;Acc:HGNC:5466]	protein_coding	0.458507	6.80595e-168
ENSG00000105852	PON3	7	-	95359872	95396375	paraoxonase 3 [Source:HGNC Symbol;Acc:HGNC:9206]	protein_coding	0.458044	3.37668e-29
ENSG00000172301	COPRS	17	-	31851871	31859291	coordinator of PRMT5 and differentiation stimulator [Source:HGNC Symbol;Acc:HGNC:28848]	protein_coding	0.45785	7.68663e-55
ENSG00000204632	HLA-G	6	+	29826967	29831125	major histocompatibility complex, class I, G [Source:HGNC Symbol;Acc:HGNC:4964]	protein_coding	0.457836	2.49718e-10
ENSG00000165807	PPP1R36	14	+	64549920	64589381	protein phosphatase 1 regulatory subunit 36 [Source:HGNC Symbol;Acc:HGNC:20097]	protein_coding	0.457739	2.41423e-06
ENSG00000243279	PRAF2	X	-	49071161	49074002	PRA1 domain family member 2 [Source:HGNC Symbol;Acc:HGNC:28911]	protein_coding	0.457495	1.04552e-35
ENSG00000149646	CNBD2	20	+	35954564	36030700	cyclic nucleotide binding domain containing 2 [Source:HGNC Symbol;Acc:HGNC:16145]	protein_coding	0.457374	6.97021e-08
ENSG00000166073	GPR176	15	-	39799008	39920266	G protein-coupled receptor 176 [Source:HGNC Symbol;Acc:HGNC:32370]	protein_coding	0.456658	3.74789e-43
ENSG00000143786	CNIH3	1	+	224434660	224740554	cornichon family AMPA receptor auxiliary protein 3 [Source:HGNC Symbol;Acc:HGNC:26802]	protein_coding	0.456655	1.85366e-20
ENSG00000185634	SHC4	15	-	48823741	48963919	SHC adaptor protein 4 [Source:HGNC Symbol;Acc:HGNC:16743]	protein_coding	0.456235	2.20063e-07
ENSG00000138061	CYP1B1	2	-	38066973	38109902	cytochrome P450 family 1 subfamily B member 1 [Source:HGNC Symbol;Acc:HGNC:2597]	protein_coding	0.456221	1.07322e-84
ENSG00000162817	C1orf115	1	+	220690363	220699153	chromosome 1 open reading frame 115 [Source:HGNC Symbol;Acc:HGNC:25873]	protein_coding	0.456201	2.33923e-76
ENSG00000176401	EID2B	19	-	39530987	39532852	EP300 interacting inhibitor of differentiation 2B [Source:HGNC Symbol;Acc:HGNC:26796]	protein_coding	0.456157	5.80871e-09
ENSG00000161921	CXCL16	17	-	4733531	4739928	C-X-C motif chemokine ligand 16 [Source:HGNC Symbol;Acc:HGNC:16642]	protein_coding	0.456126	7.97655e-59
ENSG00000225217	HSPA7	1	+	161606291	161608217	heat shock protein family A (Hsp70) member 7 (pseudogene) [Source:HGNC Symbol;Acc:HGNC:5240]	unprocessed_pseudogene	0.456117	1.53297e-45
ENSG00000187796	CARD9	9	-	136361903	136373681	caspase recruitment domain family member 9 [Source:HGNC Symbol;Acc:HGNC:16391]	protein_coding	0.455751	6.356e-13
ENSG00000124343	XG	X	+	2752040	2816500	Xg glycoprotein (Xg blood group) [Source:HGNC Symbol;Acc:HGNC:12806]	protein_coding	0.455129	3.21455e-129
ENSG00000186474	KLK12	19	-	51029092	51035230	kallikrein related peptidase 12 [Source:HGNC Symbol;Acc:HGNC:6360]	protein_coding	0.455021	1.14532e-06
ENSG00000130038	CRACR2A	12	-	3606633	3764819	calcium release activated channel regulator 2A [Source:HGNC Symbol;Acc:HGNC:28657]	protein_coding	0.454851	8.76042e-07
ENSG00000127329	PTPRB	12	-	70515866	70637440	protein tyrosine phosphatase receptor type B [Source:HGNC Symbol;Acc:HGNC:9665]	protein_coding	0.454546	1.23487e-76
ENSG00000174171	AC020659.1	15	+	41892777	41899528	novel transcript, antisense to SPTBN5	lncRNA	0.454359	2.19318e-08
ENSG00000138792	ENPEP	4	+	110365733	110565285	glutamyl aminopeptidase [Source:HGNC Symbol;Acc:HGNC:3355]	protein_coding	0.454343	3.10608e-10
ENSG00000177098	SCN4B	11	-	118133377	118152888	sodium voltage-gated channel beta subunit 4 [Source:HGNC Symbol;Acc:HGNC:10592]	protein_coding	0.45425	7.34229e-55
ENSG00000138615	CILP	15	-	65194760	65211473	cartilage intermediate layer protein [Source:HGNC Symbol;Acc:HGNC:1980]	protein_coding	0.454239	8.53166e-23
ENSG00000196843	ARID5A	2	+	96536743	96552634	AT-rich interaction domain 5A [Source:HGNC Symbol;Acc:HGNC:17361]	protein_coding	0.454065	1.29886e-46
ENSG00000121361	KCNJ8	12	-	21764955	21775600	potassium inwardly rectifying channel subfamily J member 8 [Source:HGNC Symbol;Acc:HGNC:6269]	protein_coding	0.454025	1.85483e-41
ENSG00000137804	NUSAP1	15	+	41320794	41381050	nucleolar and spindle associated protein 1 [Source:HGNC Symbol;Acc:HGNC:18538]	protein_coding	0.453783	6.14144e-24
ENSG00000134874	DZIP1	13	-	95578202	95644706	DAZ interacting zinc finger protein 1 [Source:HGNC Symbol;Acc:HGNC:20908]	protein_coding	0.453553	8.65425e-69
ENSG00000284753	EEF1AKMT4	3	+	184249672	184258759	EEF1A lysine methyltransferase 4 [Source:HGNC Symbol;Acc:HGNC:53611]	protein_coding	0.453509	3.66714e-12
ENSG00000163053	SLC16A14	2	-	230034982	230068993	solute carrier family 16 member 14 [Source:HGNC Symbol;Acc:HGNC:26417]	protein_coding	0.452624	4.23174e-21
ENSG00000276045	ORAI1	12	+	121626550	121642677	ORAI calcium release-activated calcium modulator 1 [Source:HGNC Symbol;Acc:HGNC:25896]	protein_coding	0.452422	2.87486e-30
ENSG00000133710	SPINK5	5	+	148025683	148137382	serine peptidase inhibitor Kazal type 5 [Source:HGNC Symbol;Acc:HGNC:15464]	protein_coding	0.452383	6.88699e-155
ENSG00000146094	DOK3	5	-	177501907	177511274	docking protein 3 [Source:HGNC Symbol;Acc:HGNC:24583]	protein_coding	0.452204	2.40458e-13
ENSG00000172935	MRGPRF	11	-	69004395	69013382	MAS related GPR family member F [Source:HGNC Symbol;Acc:HGNC:24828]	protein_coding	0.452074	2.76883e-34
ENSG00000137672	TRPC6	11	-	101451564	101872562	transient receptor potential cation channel subfamily C member 6 [Source:HGNC Symbol;Acc:HGNC:12338]	protein_coding	0.451297	3.66596e-18
ENSG00000223960	CHROMR	2	+	178413635	178440243	cholesterol induced regulator of metabolism RNA [Source:HGNC Symbol;Acc:HGNC:54059]	lncRNA	0.451177	2.25981e-20
ENSG00000183807	FAM162B	6	-	116752197	116765719	family with sequence similarity 162 member B [Source:HGNC Symbol;Acc:HGNC:21549]	protein_coding	0.451081	3.1106e-10
ENSG00000167315	ACAA2	18	-	49782164	49813953	acetyl-CoA acyltransferase 2 [Source:HGNC Symbol;Acc:HGNC:83]	protein_coding	0.451035	1.20284e-51
ENSG00000065054	SLC9A3R2	16	+	2025356	2039026	SLC9A3 regulator 2 [Source:HGNC Symbol;Acc:HGNC:11076]	protein_coding	0.45099	8.67228e-113
ENSG00000180879	SSR4	X	+	153793516	153798499	signal sequence receptor subunit 4 [Source:HGNC Symbol;Acc:HGNC:11326]	protein_coding	0.450907	1.55273e-194
ENSG00000188783	PRELP	1	+	203475806	203491352	proline and arginine rich end leucine rich repeat protein [Source:HGNC Symbol;Acc:HGNC:9357]	protein_coding	0.450775	0
ENSG00000071073	MGAT4A	2	-	98619106	98731132	alpha-1,3-mannosyl-glycoprotein 4-beta-N-acetylglucosaminyltransferase A [Source:HGNC Symbol;Acc:HGNC:7047]	protein_coding	0.450713	3.12057e-82
ENSG00000180638	SLC47A2	17	-	19678288	19718979	solute carrier family 47 member 2 [Source:HGNC Symbol;Acc:HGNC:26439]	protein_coding	0.450582	8.79928e-25
ENSG00000197540	GZMM	19	+	544034	549924	granzyme M [Source:HGNC Symbol;Acc:HGNC:4712]	protein_coding	0.4504	1.89925e-10
ENSG00000157303	SUSD3	9	+	93058688	93085133	sushi domain containing 3 [Source:HGNC Symbol;Acc:HGNC:28391]	protein_coding	0.450283	2.34093e-07
ENSG00000164116	GUCY1A1	4	+	155666726	155737059	guanylate cyclase 1 soluble subunit alpha 1 [Source:HGNC Symbol;Acc:HGNC:4685]	protein_coding	0.449937	5.35359e-133
ENSG00000196329	GIMAP5	7	+	150722253	150750033	GTPase, IMAP family member 5 [Source:HGNC Symbol;Acc:HGNC:18005]	protein_coding	0.44952	3.02584e-94
ENSG00000173546	CSPG4	15	-	75674322	75712848	chondroitin sulfate proteoglycan 4 [Source:HGNC Symbol;Acc:HGNC:2466]	protein_coding	0.449518	4.51244e-24
ENSG00000257341	AL928654.3	14	+	105487199	105492267	novel protein	protein_coding	0.449356	5.33049e-07
ENSG00000162944	RFTN2	2	-	197568224	197676045	raftlin family member 2 [Source:HGNC Symbol;Acc:HGNC:26402]	protein_coding	0.449172	4.07595e-31
ENSG00000066279	ASPM	1	-	197084127	197146694	assembly factor for spindle microtubules [Source:HGNC Symbol;Acc:HGNC:19048]	protein_coding	0.448906	6.58215e-12
ENSG00000114948	ADAM23	2	+	206443532	206621127	ADAM metallopeptidase domain 23 [Source:HGNC Symbol;Acc:HGNC:202]	protein_coding	0.448703	4.38072e-14
ENSG00000130558	OLFM1	9	+	135075422	135121180	olfactomedin 1 [Source:HGNC Symbol;Acc:HGNC:17187]	protein_coding	0.448267	3.09592e-72
ENSG00000004399	PLXND1	3	-	129555214	129606676	plexin D1 [Source:HGNC Symbol;Acc:HGNC:9107]	protein_coding	0.448266	5.21729e-206
ENSG00000050344	NFE2L3	7	+	26152198	26187137	nuclear factor, erythroid 2 like 3 [Source:HGNC Symbol;Acc:HGNC:7783]	protein_coding	0.448203	6.00516e-47
ENSG00000095303	PTGS1	9	+	122370530	122395703	prostaglandin-endoperoxide synthase 1 [Source:HGNC Symbol;Acc:HGNC:9604]	protein_coding	0.447755	1.20255e-41
ENSG00000139410	SDSL	12	+	113422380	113438276	serine dehydratase like [Source:HGNC Symbol;Acc:HGNC:30404]	protein_coding	0.447733	6.60414e-13
ENSG00000173221	GLRX	5	-	95751319	95822726	glutaredoxin [Source:HGNC Symbol;Acc:HGNC:4330]	protein_coding	0.447367	3.16324e-99
ENSG00000183722	LHFPL6	13	-	39209116	39603528	LHFPL tetraspan subfamily member 6 [Source:HGNC Symbol;Acc:HGNC:6586]	protein_coding	0.447306	3.95829e-259
ENSG00000184500	PROS1	3	-	93873051	93980003	protein S [Source:HGNC Symbol;Acc:HGNC:9456]	protein_coding	0.447198	3.38022e-210
ENSG00000233654	AC108047.1	2	+	190534855	190569776	novel transcript	lncRNA	0.446958	6.16064e-08
ENSG00000264920	AC018521.5	17	-	47891229	47895812	novel transcript	lncRNA	0.446519	1.32702e-11
ENSG00000131386	GALNT15	3	+	16174680	16231992	polypeptide N-acetylgalactosaminyltransferase 15 [Source:HGNC Symbol;Acc:HGNC:21531]	protein_coding	0.446024	1.06375e-54
ENSG00000139508	SLC46A3	13	-	28700064	28718970	solute carrier family 46 member 3 [Source:HGNC Symbol;Acc:HGNC:27501]	protein_coding	0.445944	6.20909e-57
ENSG00000142173	COL6A2	21	+	46098112	46132848	collagen type VI alpha 2 chain [Source:HGNC Symbol;Acc:HGNC:2212]	protein_coding	0.445572	0
ENSG00000169302	STK32A	5	+	147234963	147387855	serine/threonine kinase 32A [Source:HGNC Symbol;Acc:HGNC:28317]	protein_coding	0.445537	6.33573e-17
ENSG00000239697	TNFSF12	17	+	7549058	7557890	TNF superfamily member 12 [Source:HGNC Symbol;Acc:HGNC:11927]	protein_coding	0.445357	7.80336e-78
ENSG00000119865	CNRIP1	2	-	68284171	68320051	cannabinoid receptor interacting protein 1 [Source:HGNC Symbol;Acc:HGNC:24546]	protein_coding	0.444874	1.07983e-45
ENSG00000151917	BEND6	6	+	56955107	57027346	BEN domain containing 6 [Source:HGNC Symbol;Acc:HGNC:20871]	protein_coding	0.444593	1.06939e-16
ENSG00000143369	ECM1	1	+	150508062	150513789	extracellular matrix protein 1 [Source:HGNC Symbol;Acc:HGNC:3153]	protein_coding	0.44455	7.28523e-139
ENSG00000084636	COL16A1	1	-	31652263	31704319	collagen type XVI alpha 1 chain [Source:HGNC Symbol;Acc:HGNC:2193]	protein_coding	0.44433	2.65998e-145
ENSG00000158715	SLC45A3	1	-	205657851	205680509	solute carrier family 45 member 3 [Source:HGNC Symbol;Acc:HGNC:8642]	protein_coding	0.444245	7.06904e-13
ENSG00000123143	PKN1	19	+	14433053	14471867	protein kinase N1 [Source:HGNC Symbol;Acc:HGNC:9405]	protein_coding	0.444239	3.65072e-110
ENSG00000242114	MTFP1	22	+	30425623	30429054	mitochondrial fission process 1 [Source:HGNC Symbol;Acc:HGNC:26945]	protein_coding	0.444056	9.61302e-23
ENSG00000142347	MYO1F	19	-	8520778	8577577	myosin IF [Source:HGNC Symbol;Acc:HGNC:7600]	protein_coding	0.443006	6.03591e-58
ENSG00000243749	TMEM35B	1	-	34981535	34985353	transmembrane protein 35B [Source:HGNC Symbol;Acc:HGNC:40021]	protein_coding	0.442742	4.67721e-70
ENSG00000196684	HSH2D	19	+	16134028	16158575	hematopoietic SH2 domain containing [Source:HGNC Symbol;Acc:HGNC:24920]	protein_coding	0.442625	1.5226e-14
ENSG00000101230	ISM1	20	+	13221274	13300651	isthmin 1 [Source:HGNC Symbol;Acc:HGNC:16213]	protein_coding	0.442578	2.16541e-42
ENSG00000185561	TLCD2	17	-	1702816	1710377	TLC domain containing 2 [Source:HGNC Symbol;Acc:HGNC:33522]	protein_coding	0.442438	2.2207e-34
ENSG00000154978	VOPP1	7	-	55436056	55572988	VOPP1 WW domain binding protein [Source:HGNC Symbol;Acc:HGNC:34518]	protein_coding	0.442177	6.75017e-176
ENSG00000115112	TFCP2L1	2	-	121216587	121285202	transcription factor CP2 like 1 [Source:HGNC Symbol;Acc:HGNC:17925]	protein_coding	0.442137	3.90968e-51
ENSG00000128849	CGNL1	15	+	57375967	57550727	cingulin like 1 [Source:HGNC Symbol;Acc:HGNC:25931]	protein_coding	0.441964	4.79582e-114
ENSG00000113273	ARSB	5	-	78777209	78986087	arylsulfatase B [Source:HGNC Symbol;Acc:HGNC:714]	protein_coding	0.441894	9.39142e-28
ENSG00000099998	GGT5	22	-	24219654	24245142	gamma-glutamyltransferase 5 [Source:HGNC Symbol;Acc:HGNC:4260]	protein_coding	0.441843	2.19951e-58
ENSG00000055813	CCDC85A	2	+	56183990	56386172	coiled-coil domain containing 85A [Source:HGNC Symbol;Acc:HGNC:29400]	protein_coding	0.44179	1.94032e-07
ENSG00000148180	GSN	9	+	121207794	121332843	gelsolin [Source:HGNC Symbol;Acc:HGNC:4620]	protein_coding	0.441634	0
ENSG00000162148	PPP1R32	11	+	61481120	61490931	protein phosphatase 1 regulatory subunit 32 [Source:HGNC Symbol;Acc:HGNC:28869]	protein_coding	0.441477	3.7973e-06
ENSG00000214063	TSPAN4	11	+	842812	867116	tetraspanin 4 [Source:HGNC Symbol;Acc:HGNC:11859]	protein_coding	0.441447	2.10998e-124
ENSG00000260228	AC009119.1	16	-	83789967	83807834	novel transcript, antisense to CDH13	lncRNA	0.441429	1.61703e-09
ENSG00000196557	CACNA1H	16	+	1153106	1221771	calcium voltage-gated channel subunit alpha1 H [Source:HGNC Symbol;Acc:HGNC:1395]	protein_coding	0.441297	2.81797e-12
ENSG00000162073	PAQR4	16	+	2969270	2973484	progestin and adipoQ receptor family member 4 [Source:HGNC Symbol;Acc:HGNC:26386]	protein_coding	0.441223	2.10781e-28
ENSG00000139629	GALNT6	12	-	51351247	51392867	polypeptide N-acetylgalactosaminyltransferase 6 [Source:HGNC Symbol;Acc:HGNC:4128]	protein_coding	0.440731	2.65918e-42
ENSG00000163171	CDC42EP3	2	-	37641882	37738468	CDC42 effector protein 3 [Source:HGNC Symbol;Acc:HGNC:16943]	protein_coding	0.440476	1.23622e-118
ENSG00000139187	KLRG1	12	+	8950044	9010760	killer cell lectin like receptor G1 [Source:HGNC Symbol;Acc:HGNC:6380]	protein_coding	0.440393	2.29107e-12
ENSG00000148516	ZEB1	10	+	31318495	31529814	zinc finger E-box binding homeobox 1 [Source:HGNC Symbol;Acc:HGNC:11642]	protein_coding	0.440288	8.66894e-116
ENSG00000106538	RARRES2	7	-	150338317	150341662	retinoic acid receptor responder 2 [Source:HGNC Symbol;Acc:HGNC:9868]	protein_coding	0.440253	3.85578e-157
ENSG00000283175	AC007920.2	3	+	187291272	187297933	novel transcript, antisense to MASP1	lncRNA	0.440192	2.6504e-08
ENSG00000159403	C1R	12	-	7080214	7092540	complement C1r [Source:HGNC Symbol;Acc:HGNC:1246]	protein_coding	0.440154	0
ENSG00000175264	CHST1	11	-	45647689	45665622	carbohydrate sulfotransferase 1 [Source:HGNC Symbol;Acc:HGNC:1969]	protein_coding	0.440145	6.97652e-11
ENSG00000086300	SNX10	7	+	26291862	26374383	sorting nexin 10 [Source:HGNC Symbol;Acc:HGNC:14974]	protein_coding	0.439978	3.15441e-30
ENSG00000227544	AC018647.1	7	+	35715032	35734924	novel transcript	lncRNA	0.439762	7.88615e-07
ENSG00000159231	CBR3	21	+	36135079	36146562	carbonyl reductase 3 [Source:HGNC Symbol;Acc:HGNC:1549]	protein_coding	0.43974	2.83831e-71
ENSG00000157045	NTAN1	16	-	15037854	15056079	N-terminal asparagine amidase [Source:HGNC Symbol;Acc:HGNC:29909]	protein_coding	0.439735	1.0452e-95
ENSG00000117461	PIK3R3	1	-	46040140	46133036	phosphoinositide-3-kinase regulatory subunit 3 [Source:HGNC Symbol;Acc:HGNC:8981]	protein_coding	0.439506	7.05365e-91
ENSG00000105131	EPHX3	19	-	15226919	15233435	epoxide hydrolase 3 [Source:HGNC Symbol;Acc:HGNC:23760]	protein_coding	0.439388	2.27685e-08
ENSG00000169964	TMEM42	3	+	44861904	44865670	transmembrane protein 42 [Source:HGNC Symbol;Acc:HGNC:28444]	protein_coding	0.43937	1.7409e-44
ENSG00000118849	RARRES1	3	-	158696892	158732489	retinoic acid receptor responder 1 [Source:HGNC Symbol;Acc:HGNC:9867]	protein_coding	0.439034	0
ENSG00000131459	GFPT2	5	-	180300698	180353336	glutamine-fructose-6-phosphate transaminase 2 [Source:HGNC Symbol;Acc:HGNC:4242]	protein_coding	0.438773	6.89232e-22
ENSG00000151491	EPS8	12	-	15620134	15882329	epidermal growth factor receptor pathway substrate 8 [Source:HGNC Symbol;Acc:HGNC:3420]	protein_coding	0.438059	6.48073e-207
ENSG00000104055	TGM5	15	-	43232590	43266928	transglutaminase 5 [Source:HGNC Symbol;Acc:HGNC:11781]	protein_coding	0.437447	4.02574e-11
ENSG00000162078	ZG16B	16	+	2830169	2839585	zymogen granule protein 16B [Source:HGNC Symbol;Acc:HGNC:30456]	protein_coding	0.437426	7.58229e-59
ENSG00000161835	TAMALIN	12	+	52006946	52015889	trafficking regulator and scaffold protein tamalin [Source:HGNC Symbol;Acc:HGNC:18707]	protein_coding	0.437146	9.97003e-60
ENSG00000017483	SLC38A5	X	-	48458537	48470260	solute carrier family 38 member 5 [Source:HGNC Symbol;Acc:HGNC:18070]	protein_coding	0.436923	1.59284e-24
ENSG00000180828	BHLHE22	8	+	64580365	64583627	basic helix-loop-helix family member e22 [Source:HGNC Symbol;Acc:HGNC:11963]	protein_coding	0.436784	5.8324e-14
ENSG00000169442	CD52	1	+	26317958	26320523	CD52 molecule [Source:HGNC Symbol;Acc:HGNC:1804]	protein_coding	0.436729	1.45187e-56
ENSG00000166171	DPCD	10	+	101570560	101609662	deleted in primary ciliary dyskinesia homolog (mouse) [Source:HGNC Symbol;Acc:HGNC:24542]	protein_coding	0.436552	8.81756e-35
ENSG00000181026	AEN	15	+	88621337	88632281	apoptosis enhancing nuclease [Source:HGNC Symbol;Acc:HGNC:25722]	protein_coding	0.436535	6.12511e-52
ENSG00000126787	DLGAP5	14	-	55148112	55191608	DLG associated protein 5 [Source:HGNC Symbol;Acc:HGNC:16864]	protein_coding	0.436212	3.70254e-09
ENSG00000165480	SKA3	13	-	21153595	21176552	spindle and kinetochore associated complex subunit 3 [Source:HGNC Symbol;Acc:HGNC:20262]	protein_coding	0.436166	3.34656e-06
ENSG00000142227	EMP3	19	+	48321509	48330553	epithelial membrane protein 3 [Source:HGNC Symbol;Acc:HGNC:3335]	protein_coding	0.435649	7.17945e-103
ENSG00000233695	GAS6-AS1	13	+	113815630	113845744	GAS6 antisense RNA 1 [Source:HGNC Symbol;Acc:HGNC:39826]	lncRNA	0.435264	1.17073e-10
ENSG00000106688	SLC1A1	9	+	4490468	4587469	solute carrier family 1 member 1 [Source:HGNC Symbol;Acc:HGNC:10939]	protein_coding	0.435258	9.16911e-40
ENSG00000065485	PDIA5	3	+	123067025	123225227	protein disulfide isomerase family A member 5 [Source:HGNC Symbol;Acc:HGNC:24811]	protein_coding	0.434777	8.96918e-54
ENSG00000112208	BAG2	6	+	57172326	57189833	BAG cochaperone 2 [Source:HGNC Symbol;Acc:HGNC:938]	protein_coding	0.434522	1.31404e-37
ENSG00000271853	AL162258.1	1	-	153626332	153634340	novel transcript	lncRNA	0.434478	2.49075e-18
ENSG00000152952	PLOD2	3	-	146069440	146163653	procollagen-lysine,2-oxoglutarate 5-dioxygenase 2 [Source:HGNC Symbol;Acc:HGNC:9082]	protein_coding	0.434244	7.08385e-53
ENSG00000065911	MTHFD2	2	+	74198610	74217565	methylenetetrahydrofolate dehydrogenase (NADP+ dependent) 2, methenyltetrahydrofolate cyclohydrolase [Source:HGNC Symbol;Acc:HGNC:7434]	protein_coding	0.433923	1.43873e-80
ENSG00000034510	TMSB10	2	+	84905656	84906671	thymosin beta 10 [Source:HGNC Symbol;Acc:HGNC:11879]	protein_coding	0.433877	0
ENSG00000263843	AC022211.2	17	+	75271369	75273895	novel transcript, antisense to SLC25A19	lncRNA	0.433793	1.63658e-06
ENSG00000169418	NPR1	1	+	153678688	153693992	natriuretic peptide receptor 1 [Source:HGNC Symbol;Acc:HGNC:7943]	protein_coding	0.433716	3.82947e-15
ENSG00000237248	LINC00987	12	+	9240003	9257960	long intergenic non-protein coding RNA 987 [Source:HGNC Symbol;Acc:HGNC:48911]	lncRNA	0.433657	3.41255e-11
ENSG00000163754	GYG1	3	+	148991408	149031775	glycogenin 1 [Source:HGNC Symbol;Acc:HGNC:4699]	protein_coding	0.433601	4.70213e-197
ENSG00000198429	ZNF69	19	+	11887782	11914329	zinc finger protein 69 [Source:HGNC Symbol;Acc:HGNC:13138]	protein_coding	0.433516	3.64394e-12
ENSG00000176890	TYMS	18	+	657653	673578	thymidylate synthetase [Source:HGNC Symbol;Acc:HGNC:12441]	protein_coding	0.432919	4.43348e-23
ENSG00000119280	C1orf198	1	-	230837119	230869589	chromosome 1 open reading frame 198 [Source:HGNC Symbol;Acc:HGNC:25900]	protein_coding	0.432875	5.75646e-160
ENSG00000072163	LIMS2	2	-	127638381	127681786	LIM zinc finger domain containing 2 [Source:HGNC Symbol;Acc:HGNC:16084]	protein_coding	0.432583	8.91744e-34
ENSG00000151117	TMEM86A	11	+	18693122	18704785	transmembrane protein 86A [Source:HGNC Symbol;Acc:HGNC:26890]	protein_coding	0.432548	9.56851e-15
ENSG00000010319	SEMA3G	3	-	52433035	52445103	semaphorin 3G [Source:HGNC Symbol;Acc:HGNC:30400]	protein_coding	0.43249	1.45911e-54
ENSG00000143412	ANXA9	1	+	150982249	150995634	annexin A9 [Source:HGNC Symbol;Acc:HGNC:547]	protein_coding	0.431921	2.56945e-14
ENSG00000027869	SH2D2A	1	-	156806243	156816848	SH2 domain containing 2A [Source:HGNC Symbol;Acc:HGNC:10821]	protein_coding	0.43188	5.98133e-08
ENSG00000077238	IL4R	16	+	27313668	27364778	interleukin 4 receptor [Source:HGNC Symbol;Acc:HGNC:6015]	protein_coding	0.43184	7.02634e-172
ENSG00000136250	AOAH	7	-	36512941	36724549	acyloxyacyl hydrolase [Source:HGNC Symbol;Acc:HGNC:548]	protein_coding	0.431452	3.27291e-08
ENSG00000171840	NINJ2	12	-	564296	663779	ninjurin 2 [Source:HGNC Symbol;Acc:HGNC:7825]	protein_coding	0.431373	1.37375e-09
ENSG00000115590	IL1R2	2	+	101991960	102028544	interleukin 1 receptor type 2 [Source:HGNC Symbol;Acc:HGNC:5994]	protein_coding	0.430815	3.52881e-43
ENSG00000180660	MAB21L1	13	-	35473789	35476689	mab-21 like 1 [Source:HGNC Symbol;Acc:HGNC:6757]	protein_coding	0.430741	5.58306e-38
ENSG00000102524	TNFSF13B	13	+	108251240	108308484	TNF superfamily member 13b [Source:HGNC Symbol;Acc:HGNC:11929]	protein_coding	0.430659	1.0366e-41
ENSG00000120262	CCDC170	6	+	151494017	151621193	coiled-coil domain containing 170 [Source:HGNC Symbol;Acc:HGNC:21177]	protein_coding	0.43055	1.70583e-14
ENSG00000187942	LDLRAD2	1	+	21812265	21825225	low density lipoprotein receptor class A domain containing 2 [Source:HGNC Symbol;Acc:HGNC:32071]	protein_coding	0.430414	2.28572e-14
ENSG00000175832	ETV4	17	-	43527844	43579620	ETS variant transcription factor 4 [Source:HGNC Symbol;Acc:HGNC:3493]	protein_coding	0.43028	5.09396e-17
ENSG00000231663	COA6-AS1	1	-	234372807	234373593	COA6 antisense RNA 1 [Source:HGNC Symbol;Acc:HGNC:40825]	lncRNA	0.430074	4.31856e-08
ENSG00000187922	LCN10	9	-	136738167	136743356	lipocalin 10 [Source:HGNC Symbol;Acc:HGNC:20892]	protein_coding	0.429933	3.06909e-10
ENSG00000122122	SASH3	X	+	129779949	129795201	SAM and SH3 domain containing 3 [Source:HGNC Symbol;Acc:HGNC:15975]	protein_coding	0.429698	3.28609e-44
ENSG00000177738	AC025171.1	5	-	43013060	43067452	novel transcript, sense overlapping to ANXA2R	lncRNA	0.429642	3.28231e-06
ENSG00000176771	NCKAP5	2	-	132671788	133568463	NCK associated protein 5 [Source:HGNC Symbol;Acc:HGNC:29847]	protein_coding	0.42952	7.1873e-22
ENSG00000163923	RPL39L	3	-	187120948	187180908	ribosomal protein L39 like [Source:HGNC Symbol;Acc:HGNC:17094]	protein_coding	0.429518	3.67683e-26
ENSG00000205795	CYS1	2	-	10056780	10080944	cystin 1 [Source:HGNC Symbol;Acc:HGNC:18525]	protein_coding	0.429141	1.68411e-47
ENSG00000092607	TBX15	1	-	118883046	118989556	T-box transcription factor 15 [Source:HGNC Symbol;Acc:HGNC:11594]	protein_coding	0.429057	9.29079e-18
ENSG00000133561	GIMAP6	7	-	150625375	150632648	GTPase, IMAP family member 6 [Source:HGNC Symbol;Acc:HGNC:21918]	protein_coding	0.428662	2.77557e-184
ENSG00000244041	LINC01011	6	+	2987967	2991173	long intergenic non-protein coding RNA 1011 [Source:HGNC Symbol;Acc:HGNC:33812]	lncRNA	0.428621	7.3474e-15
ENSG00000008394	MGST1	12	+	16347142	16609259	microsomal glutathione S-transferase 1 [Source:HGNC Symbol;Acc:HGNC:7061]	protein_coding	0.428072	4.50644e-223
ENSG00000007968	E2F2	1	-	23506438	23531233	E2F transcription factor 2 [Source:HGNC Symbol;Acc:HGNC:3114]	protein_coding	0.427881	2.90923e-15
ENSG00000080986	NDC80	18	+	2571557	2616635	NDC80 kinetochore complex component [Source:HGNC Symbol;Acc:HGNC:16909]	protein_coding	0.427879	3.64394e-12
ENSG00000169902	TPST1	7	+	66205317	66420543	tyrosylprotein sulfotransferase 1 [Source:HGNC Symbol;Acc:HGNC:12020]	protein_coding	0.427688	8.63354e-50
ENSG00000137807	KIF23	15	+	69414246	69448427	kinesin family member 23 [Source:HGNC Symbol;Acc:HGNC:6392]	protein_coding	0.427157	4.74654e-10
ENSG00000135549	PKIB	6	+	122471917	122726373	cAMP-dependent protein kinase inhibitor beta [Source:HGNC Symbol;Acc:HGNC:9018]	protein_coding	0.42693	2.1031e-35
ENSG00000147251	DOCK11	X	+	118495898	118686163	dedicator of cytokinesis 11 [Source:HGNC Symbol;Acc:HGNC:23483]	protein_coding	0.426793	3.26359e-56
ENSG00000023445	BIRC3	11	+	102317450	102339403	baculoviral IAP repeat containing 3 [Source:HGNC Symbol;Acc:HGNC:591]	protein_coding	0.426783	5.3742e-147
ENSG00000166016	ABTB2	11	-	34150987	34358010	ankyrin repeat and BTB domain containing 2 [Source:HGNC Symbol;Acc:HGNC:23842]	protein_coding	0.426723	7.70183e-20
ENSG00000106772	PRUNE2	9	-	76611376	76906114	prune homolog 2 with BCH domain [Source:HGNC Symbol;Acc:HGNC:25209]	protein_coding	0.42629	5.91598e-98
ENSG00000134363	FST	5	+	53480626	53487134	follistatin [Source:HGNC Symbol;Acc:HGNC:3971]	protein_coding	0.426038	2.88157e-98
ENSG00000101333	PLCB4	20	+	9068763	9481242	phospholipase C beta 4 [Source:HGNC Symbol;Acc:HGNC:9059]	protein_coding	0.42599	9.60284e-51
ENSG00000126882	FAM78A	9	-	131258076	131276510	family with sequence similarity 78 member A [Source:HGNC Symbol;Acc:HGNC:25465]	protein_coding	0.425912	4.21552e-22
ENSG00000175040	CHST2	3	+	143119771	143124014	carbohydrate sulfotransferase 2 [Source:HGNC Symbol;Acc:HGNC:1970]	protein_coding	0.425907	1.07031e-20
ENSG00000075461	CACNG4	17	+	66964707	67033398	calcium voltage-gated channel auxiliary subunit gamma 4 [Source:HGNC Symbol;Acc:HGNC:1408]	protein_coding	0.425846	5.41426e-17
ENSG00000174099	MSRB3	12	+	65278643	65491430	methionine sulfoxide reductase B3 [Source:HGNC Symbol;Acc:HGNC:27375]	protein_coding	0.425815	5.46818e-117
ENSG00000188404	SELL	1	-	169690665	169711702	selectin L [Source:HGNC Symbol;Acc:HGNC:10720]	protein_coding	0.425799	1.91407e-20
ENSG00000277957	SENP3-EIF4A1	17	+	7563287	7578715	SENP3-EIF4A1 readthrough (NMD candidate) [Source:HGNC Symbol;Acc:HGNC:49182]	protein_coding	0.425763	4.48391e-17
ENSG00000161958	FGF11	17	+	7438273	7444937	fibroblast growth factor 11 [Source:HGNC Symbol;Acc:HGNC:3667]	protein_coding	0.425505	3.27525e-30
ENSG00000092841	MYL6	12	+	56158346	56163496	myosin light chain 6 [Source:HGNC Symbol;Acc:HGNC:7587]	protein_coding	0.424713	0
ENSG00000163736	PPBP	4	-	73986439	73988190	pro-platelet basic protein [Source:HGNC Symbol;Acc:HGNC:9240]	protein_coding	0.424693	2.16039e-08
ENSG00000095739	BAMBI	10	+	28677510	28682932	BMP and activin membrane bound inhibitor [Source:HGNC Symbol;Acc:HGNC:30251]	protein_coding	0.424151	2.49751e-20
ENSG00000170955	CAVIN3	11	-	6318946	6320532	caveolae associated protein 3 [Source:HGNC Symbol;Acc:HGNC:9400]	protein_coding	0.423926	5.17865e-114
ENSG00000021300	PLEKHB1	11	+	73646178	73662819	pleckstrin homology domain containing B1 [Source:HGNC Symbol;Acc:HGNC:19079]	protein_coding	0.423505	9.12745e-19
ENSG00000250303	LINC02762	11	+	112270749	112362534	long intergenic non-protein coding RNA 2762 [Source:HGNC Symbol;Acc:HGNC:27443]	lncRNA	0.423393	1.13011e-17
ENSG00000101400	SNTA1	20	-	33407957	33443763	syntrophin alpha 1 [Source:HGNC Symbol;Acc:HGNC:11167]	protein_coding	0.422794	2.14545e-52
ENSG00000127084	FGD3	9	+	92947523	93036236	FYVE, RhoGEF and PH domain containing 3 [Source:HGNC Symbol;Acc:HGNC:16027]	protein_coding	0.422789	4.15561e-34
ENSG00000188820	CALHM6	6	+	116461370	116463771	calcium homeostasis modulator family member 6 [Source:HGNC Symbol;Acc:HGNC:33391]	protein_coding	0.42274	1.20472e-07
ENSG00000277559	AC018553.1	16	+	54290965	54292422	novel transcript	lncRNA	0.422374	9.76563e-07
ENSG00000196923	PDLIM7	5	-	177483394	177497606	PDZ and LIM domain 7 [Source:HGNC Symbol;Acc:HGNC:22958]	protein_coding	0.42197	3.62908e-80
ENSG00000155962	CLIC2	X	-	155276211	155334657	chloride intracellular channel 2 [Source:HGNC Symbol;Acc:HGNC:2063]	protein_coding	0.421461	6.43826e-146
ENSG00000114547	ROPN1B	3	+	125969160	125983454	rhophilin associated tail protein 1B [Source:HGNC Symbol;Acc:HGNC:31927]	protein_coding	0.421436	7.47216e-22
ENSG00000088992	TESC	12	-	117038923	117099479	tescalcin [Source:HGNC Symbol;Acc:HGNC:26065]	protein_coding	0.421395	4.20981e-13
ENSG00000258315	C17orf49	17	+	7014495	7017525	chromosome 17 open reading frame 49 [Source:HGNC Symbol;Acc:HGNC:28737]	protein_coding	0.421377	2.49299e-44
ENSG00000153162	BMP6	6	+	7726099	7881728	bone morphogenetic protein 6 [Source:HGNC Symbol;Acc:HGNC:1073]	protein_coding	0.421366	2.18462e-18
ENSG00000141519	CCDC40	17	+	80036632	80100613	coiled-coil domain containing 40 [Source:HGNC Symbol;Acc:HGNC:26090]	protein_coding	0.421206	4.29128e-16
ENSG00000179776	CDH5	16	+	66366622	66404784	cadherin 5 [Source:HGNC Symbol;Acc:HGNC:1764]	protein_coding	0.420965	3.4138e-112
ENSG00000272631	AC067750.1	10	-	86749754	86756298	novel transcript, antisense to BMPR1A	lncRNA	0.420886	4.00539e-06
ENSG00000090565	RAB11FIP3	16	+	425649	523011	RAB11 family interacting protein 3 [Source:HGNC Symbol;Acc:HGNC:17224]	protein_coding	0.420566	6.6383e-73
ENSG00000131477	RAMP2	17	+	42758447	42763041	receptor activity modifying protein 2 [Source:HGNC Symbol;Acc:HGNC:9844]	protein_coding	0.420464	6.71149e-50
ENSG00000271344	AC018638.6	7	+	128690451	128691717	novel transcript	lncRNA	0.420189	1.92136e-06
ENSG00000261115	TMEM178B	7	+	141074064	141480380	transmembrane protein 178B [Source:HGNC Symbol;Acc:HGNC:44112]	protein_coding	0.419555	3.56901e-10
ENSG00000156127	BATF	14	+	75522455	75546993	basic leucine zipper ATF-like transcription factor [Source:HGNC Symbol;Acc:HGNC:958]	protein_coding	0.419044	8.89753e-19
ENSG00000277758	FO681492.1	10	-	47749758	47763592	synaptotagmin-15 [Source:NCBI gene (formerly Entrezgene);Acc:102724488]	protein_coding	0.418958	1.52598e-10
ENSG00000106070	GRB10	7	-	50590063	50793462	growth factor receptor bound protein 10 [Source:HGNC Symbol;Acc:HGNC:4564]	protein_coding	0.418859	1.36793e-122
ENSG00000139354	GAS2L3	12	+	100573683	100628288	growth arrest specific 2 like 3 [Source:HGNC Symbol;Acc:HGNC:27475]	protein_coding	0.418606	9.99181e-41
ENSG00000136244	IL6	7	+	22725884	22732002	interleukin 6 [Source:HGNC Symbol;Acc:HGNC:6018]	protein_coding	0.418312	1.65197e-08
ENSG00000165794	SLC39A2	14	+	20999255	21001871	solute carrier family 39 member 2 [Source:HGNC Symbol;Acc:HGNC:17127]	protein_coding	0.418291	5.28251e-52
ENSG00000123892	RAB38	11	-	88113251	88175443	RAB38, member RAS oncogene family [Source:HGNC Symbol;Acc:HGNC:9776]	protein_coding	0.418211	5.18091e-282
ENSG00000272636	DOC2B	17	-	142789	181650	double C2 domain beta [Source:HGNC Symbol;Acc:HGNC:2986]	protein_coding	0.417291	8.32666e-41
ENSG00000168237	GLYCTK	3	+	52287089	52295257	glycerate kinase [Source:HGNC Symbol;Acc:HGNC:24247]	protein_coding	0.416836	2.19912e-14
ENSG00000125510	OPRL1	20	+	64080082	64100643	opioid related nociceptin receptor 1 [Source:HGNC Symbol;Acc:HGNC:8155]	protein_coding	0.416586	2.83173e-07
ENSG00000175602	CCDC85B	11	+	65890673	65891635	coiled-coil domain containing 85B [Source:HGNC Symbol;Acc:HGNC:24926]	protein_coding	0.416418	2.77202e-116
ENSG00000163376	KBTBD8	3	+	66998307	67011210	kelch repeat and BTB domain containing 8 [Source:HGNC Symbol;Acc:HGNC:30691]	protein_coding	0.41618	1.38187e-06
ENSG00000197943	PLCG2	16	+	81739097	81962685	phospholipase C gamma 2 [Source:HGNC Symbol;Acc:HGNC:9066]	protein_coding	0.415814	8.82776e-12
ENSG00000130203	APOE	19	+	44905791	44909393	apolipoprotein E [Source:HGNC Symbol;Acc:HGNC:613]	protein_coding	0.415575	0
ENSG00000013810	TACC3	4	+	1712891	1745171	transforming acidic coiled-coil containing protein 3 [Source:HGNC Symbol;Acc:HGNC:11524]	protein_coding	0.415283	5.33325e-41
ENSG00000219665	ZNF433-AS1	19	+	11987617	12046275	ZNF433 and ZNF878 antisense RNA 1 [Source:HGNC Symbol;Acc:HGNC:53776]	lncRNA	0.415254	4.16665e-13
ENSG00000162687	KCNT2	1	-	196225779	196609225	potassium sodium-activated channel subfamily T member 2 [Source:HGNC Symbol;Acc:HGNC:18866]	protein_coding	0.415237	9.61564e-21
ENSG00000262097	LINC02185	16	-	14001320	14016056	long intergenic non-protein coding RNA 2185 [Source:HGNC Symbol;Acc:HGNC:53047]	lncRNA	0.414783	4.98375e-23
ENSG00000131019	ULBP3	6	-	150061053	150069121	UL16 binding protein 3 [Source:HGNC Symbol;Acc:HGNC:14895]	protein_coding	0.414721	1.52046e-11
ENSG00000287929	AL354953.1	1	+	183252263	183258968	novel transcript, antisense to NMNAT2	lncRNA	0.414708	4.50858e-09
ENSG00000231764	DLX6-AS1	7	-	96955141	97014088	DLX6 antisense RNA 1 [Source:HGNC Symbol;Acc:HGNC:37151]	lncRNA	0.41436	2.76576e-17
ENSG00000005243	COPZ2	17	-	48026167	48038030	COPI coat complex subunit zeta 2 [Source:HGNC Symbol;Acc:HGNC:19356]	protein_coding	0.414042	2.78487e-97
ENSG00000127951	FGL2	7	-	77193369	77199848	fibrinogen like 2 [Source:HGNC Symbol;Acc:HGNC:3696]	protein_coding	0.414032	2.9753e-219
ENSG00000142920	AZIN2	1	+	33081104	33123492	antizyme inhibitor 2 [Source:HGNC Symbol;Acc:HGNC:29957]	protein_coding	0.413532	1.20789e-21
ENSG00000173530	TNFRSF10D	8	-	23135588	23164027	TNF receptor superfamily member 10d [Source:HGNC Symbol;Acc:HGNC:11907]	protein_coding	0.413171	3.3055e-49
ENSG00000188483	IER5L	9	-	129175552	129178261	immediate early response 5 like [Source:HGNC Symbol;Acc:HGNC:23679]	protein_coding	0.413134	6.93858e-66
ENSG00000198848	CES1	16	-	55802851	55833337	carboxylesterase 1 [Source:HGNC Symbol;Acc:HGNC:1863]	protein_coding	0.412968	3.31669e-57
ENSG00000069122	ADGRF5	6	-	46852522	46954943	adhesion G protein-coupled receptor F5 [Source:HGNC Symbol;Acc:HGNC:19030]	protein_coding	0.412893	4.07751e-95
ENSG00000158292	GPR153	1	-	6247353	6261098	G protein-coupled receptor 153 [Source:HGNC Symbol;Acc:HGNC:23618]	protein_coding	0.41266	1.90724e-86
ENSG00000133574	GIMAP4	7	+	150567369	150573953	GTPase, IMAP family member 4 [Source:HGNC Symbol;Acc:HGNC:21872]	protein_coding	0.41255	3.06921e-129
ENSG00000167157	PRRX2	9	+	129665647	129722674	paired related homeobox 2 [Source:HGNC Symbol;Acc:HGNC:21338]	protein_coding	0.412547	1.15926e-60
ENSG00000124191	TOX2	20	+	43914852	44069616	TOX high mobility group box family member 2 [Source:HGNC Symbol;Acc:HGNC:16095]	protein_coding	0.412472	2.84525e-14
ENSG00000100162	CENPM	22	-	41938737	41947152	centromere protein M [Source:HGNC Symbol;Acc:HGNC:18352]	protein_coding	0.41235	3.84631e-07
ENSG00000244306	DUXAP10	14	-	19268853	19337730	double homeobox A pseudogene 10 [Source:NCBI gene (formerly Entrezgene);Acc:503639]	transcribed_processed_pseudogene	0.412326	1.48007e-07
ENSG00000235162	C12orf75	12	+	105235290	105396097	chromosome 12 open reading frame 75 [Source:HGNC Symbol;Acc:HGNC:35164]	protein_coding	0.412238	1.1654e-148
ENSG00000214309	MBLAC1	7	+	100126785	100128495	metallo-beta-lactamase domain containing 1 [Source:HGNC Symbol;Acc:HGNC:22180]	protein_coding	0.411749	2.72699e-07
ENSG00000157368	IL34	16	+	70579895	70660682	interleukin 34 [Source:HGNC Symbol;Acc:HGNC:28529]	protein_coding	0.411749	2.75082e-50
ENSG00000163331	DAPL1	2	+	158795317	158862781	death associated protein like 1 [Source:HGNC Symbol;Acc:HGNC:21490]	protein_coding	0.41073	7.37634e-216
ENSG00000166448	TMEM130	7	-	98846488	98870771	transmembrane protein 130 [Source:HGNC Symbol;Acc:HGNC:25429]	protein_coding	0.410707	1.96661e-07
ENSG00000169403	PTAFR	1	-	28147166	28193936	platelet activating factor receptor [Source:HGNC Symbol;Acc:HGNC:9582]	protein_coding	0.410512	7.98402e-109
ENSG00000138193	PLCE1	10	+	93993931	94332823	phospholipase C epsilon 1 [Source:HGNC Symbol;Acc:HGNC:17175]	protein_coding	0.409987	1.00135e-21
ENSG00000179750	APOBEC3B	22	+	38982347	38992804	apolipoprotein B mRNA editing enzyme catalytic subunit 3B [Source:HGNC Symbol;Acc:HGNC:17352]	protein_coding	0.409901	8.80001e-31
ENSG00000130508	PXDN	2	-	1631887	1744852	peroxidasin [Source:HGNC Symbol;Acc:HGNC:14966]	protein_coding	0.409867	3.84448e-153
ENSG00000109625	CPZ	4	+	8592660	8619759	carboxypeptidase Z [Source:HGNC Symbol;Acc:HGNC:2333]	protein_coding	0.409811	1.67783e-35
ENSG00000049192	ADAMTS6	5	-	65148738	65481920	ADAM metallopeptidase with thrombospondin type 1 motif 6 [Source:HGNC Symbol;Acc:HGNC:222]	protein_coding	0.408951	3.83562e-23
ENSG00000204540	PSORS1C1	6	+	31114750	31140092	psoriasis susceptibility 1 candidate 1 [Source:HGNC Symbol;Acc:HGNC:17202]	protein_coding	0.408935	4.27463e-10
ENSG00000266256	LINC00683	18	+	76528652	76670111	long intergenic non-protein coding RNA 683 [Source:HGNC Symbol;Acc:HGNC:44467]	lncRNA	0.408852	2.51425e-20
ENSG00000124785	NRN1	6	-	5997999	6007605	neuritin 1 [Source:HGNC Symbol;Acc:HGNC:17972]	protein_coding	0.408374	9.6328e-54
ENSG00000273148	LINC00653	20	+	18794529	18796067	long intergenic non-protein coding RNA 653 [Source:HGNC Symbol;Acc:HGNC:44308]	lncRNA	0.408294	2.2345e-15
ENSG00000198832	SELENOM	22	-	31104772	31120069	selenoprotein M [Source:HGNC Symbol;Acc:HGNC:30397]	protein_coding	0.407395	2.39562e-206
ENSG00000153558	FBXL2	3	+	33277025	33403662	F-box and leucine rich repeat protein 2 [Source:HGNC Symbol;Acc:HGNC:13598]	protein_coding	0.406976	3.65529e-11
ENSG00000248441	LINC01197	15	-	95186634	95327129	long intergenic non-protein coding RNA 1197 [Source:HGNC Symbol;Acc:HGNC:49597]	lncRNA	0.406818	4.32506e-20
ENSG00000169583	CLIC3	9	-	136994608	136996568	chloride intracellular channel 3 [Source:HGNC Symbol;Acc:HGNC:2064]	protein_coding	0.406443	7.27905e-40
ENSG00000204837	FGF7P3	9	-	39816542	40106661	fibroblast growth factor 7 pseudogene 3 [Source:HGNC Symbol;Acc:HGNC:26671]	transcribed_unprocessed_pseudogene	0.405985	3.43688e-16
ENSG00000087258	GNAO1	16	+	56191390	56357444	G protein subunit alpha o1 [Source:HGNC Symbol;Acc:HGNC:4389]	protein_coding	0.405822	1.15594e-10
ENSG00000164736	SOX17	8	+	54457935	54460892	SRY-box transcription factor 17 [Source:HGNC Symbol;Acc:HGNC:18122]	protein_coding	0.404797	6.12368e-32
ENSG00000132688	NES	1	-	156668763	156677407	nestin [Source:HGNC Symbol;Acc:HGNC:7756]	protein_coding	0.404699	3.5883e-154
ENSG00000173210	ABLIM3	5	+	149141483	149260542	actin binding LIM protein family member 3 [Source:HGNC Symbol;Acc:HGNC:29132]	protein_coding	0.404693	1.82693e-54
ENSG00000155307	SAMSN1	21	-	14485228	14658821	SAM domain, SH3 domain and nuclear localization signals 1 [Source:HGNC Symbol;Acc:HGNC:10528]	protein_coding	0.404265	6.5347e-32
ENSG00000152760	TCTEX1D1	1	+	66752459	66779047	Tctex1 domain containing 1 [Source:HGNC Symbol;Acc:HGNC:26882]	protein_coding	0.404242	4.11775e-15
ENSG00000143797	MBOAT2	2	-	8852690	9003709	membrane bound O-acyltransferase domain containing 2 [Source:HGNC Symbol;Acc:HGNC:25193]	protein_coding	0.404032	3.36532e-144
ENSG00000169439	SDC2	8	+	96493813	96611790	syndecan 2 [Source:HGNC Symbol;Acc:HGNC:10659]	protein_coding	0.403898	4.85996e-251
ENSG00000224950	AL390066.2	1	-	116493016	116499212	novel transcript	lncRNA	0.403787	1.20193e-06
ENSG00000150471	ADGRL3	4	+	61201258	62078335	adhesion G protein-coupled receptor L3 [Source:HGNC Symbol;Acc:HGNC:20974]	protein_coding	0.403693	1.56978e-09
ENSG00000075884	ARHGAP15	2	+	143091362	143768352	Rho GTPase activating protein 15 [Source:HGNC Symbol;Acc:HGNC:21030]	protein_coding	0.403072	1.14189e-22
ENSG00000129009	ISLR	15	+	74173710	74176872	immunoglobulin superfamily containing leucine rich repeat [Source:HGNC Symbol;Acc:HGNC:6133]	protein_coding	0.402952	4.60038e-247
ENSG00000270800	RPS10-NUDT3	6	-	34284887	34426071	RPS10-NUDT3 readthrough [Source:HGNC Symbol;Acc:HGNC:49181]	protein_coding	0.402919	4.75111e-154
ENSG00000128805	ARHGAP22	10	-	48446036	48656265	Rho GTPase activating protein 22 [Source:HGNC Symbol;Acc:HGNC:30320]	protein_coding	0.402717	5.8365e-70
ENSG00000131634	TMEM204	16	+	1528688	1555580	transmembrane protein 204 [Source:HGNC Symbol;Acc:HGNC:14158]	protein_coding	0.402392	3.10321e-111
ENSG00000174721	FGFBP3	10	-	91906584	91909486	fibroblast growth factor binding protein 3 [Source:HGNC Symbol;Acc:HGNC:23428]	protein_coding	0.402197	4.87904e-12
ENSG00000169604	ANTXR1	2	+	69013178	69249327	ANTXR cell adhesion molecule 1 [Source:HGNC Symbol;Acc:HGNC:21014]	protein_coding	0.401669	0
ENSG00000066230	SLC9A3	5	-	470456	524449	solute carrier family 9 member A3 [Source:HGNC Symbol;Acc:HGNC:11073]	protein_coding	0.40152	6.10021e-48
ENSG00000109667	SLC2A9	4	-	9771153	10054936	solute carrier family 2 member 9 [Source:HGNC Symbol;Acc:HGNC:13446]	protein_coding	0.401481	1.1556e-08
ENSG00000236740	AL033384.1	6	+	53930022	53997667	novel transcript	lncRNA	0.401053	4.3365e-43
ENSG00000189171	S100A13	1	-	153618787	153631360	S100 calcium binding protein A13 [Source:HGNC Symbol;Acc:HGNC:10490]	protein_coding	0.400568	8.28995e-163
ENSG00000173156	RHOD	11	+	67056847	67072017	ras homolog family member D [Source:HGNC Symbol;Acc:HGNC:670]	protein_coding	0.400321	7.8649e-113
ENSG00000170786	SDR16C5	8	-	56300010	56320776	short chain dehydrogenase/reductase family 16C member 5 [Source:HGNC Symbol;Acc:HGNC:30311]	protein_coding	0.400201	1.41952e-212
ENSG00000167723	TRPV3	17	-	3510502	3557812	transient receptor potential cation channel subfamily V member 3 [Source:HGNC Symbol;Acc:HGNC:18084]	protein_coding	0.40018	7.67011e-20
ENSG00000205056	LINC02397	12	+	92466451	92492091	long intergenic non-protein coding RNA 2397 [Source:HGNC Symbol;Acc:HGNC:53323]	lncRNA	0.400061	1.03923e-09
ENSG00000128510	CPA4	7	+	130293134	130324180	carboxypeptidase A4 [Source:HGNC Symbol;Acc:HGNC:15740]	protein_coding	0.400041	6.14521e-45
ENSG00000119411	BSPRY	9	+	113349541	113371233	B-box and SPRY domain containing [Source:HGNC Symbol;Acc:HGNC:18232]	protein_coding	0.399969	5.34314e-41
ENSG00000197977	ELOVL2	6	-	10980759	11044305	ELOVL fatty acid elongase 2 [Source:HGNC Symbol;Acc:HGNC:14416]	protein_coding	0.399755	2.3129e-11
ENSG00000169429	CXCL8	4	+	73740541	73743716	C-X-C motif chemokine ligand 8 [Source:HGNC Symbol;Acc:HGNC:6025]	protein_coding	0.399456	1.69697e-32
ENSG00000165424	ZCCHC24	10	-	79382325	79445624	zinc finger CCHC-type containing 24 [Source:HGNC Symbol;Acc:HGNC:26911]	protein_coding	0.39919	6.21205e-151
ENSG00000164626	KCNK5	6	-	39188971	39229475	potassium two pore domain channel subfamily K member 5 [Source:HGNC Symbol;Acc:HGNC:6280]	protein_coding	0.399154	6.29349e-21
ENSG00000174226	SNX31	8	-	100572889	100663415	sorting nexin 31 [Source:HGNC Symbol;Acc:HGNC:28605]	protein_coding	0.3991	2.4563e-08
ENSG00000205710	C17orf107	17	+	4899418	4902934	chromosome 17 open reading frame 107 [Source:HGNC Symbol;Acc:HGNC:37238]	protein_coding	0.398813	3.27529e-19
ENSG00000203883	SOX18	20	-	64047582	64049639	SRY-box transcription factor 18 [Source:HGNC Symbol;Acc:HGNC:11194]	protein_coding	0.398668	8.43445e-96
ENSG00000179954	SSC5D	19	+	55488404	55519099	scavenger receptor cysteine rich family member with 5 domains [Source:HGNC Symbol;Acc:HGNC:26641]	protein_coding	0.398596	8.52034e-27
ENSG00000180340	FZD2	17	+	44557484	44561262	frizzled class receptor 2 [Source:HGNC Symbol;Acc:HGNC:4040]	protein_coding	0.398482	2.62569e-21
ENSG00000140030	GPR65	14	+	88005135	88014811	G protein-coupled receptor 65 [Source:HGNC Symbol;Acc:HGNC:4517]	protein_coding	0.398473	5.50134e-25
ENSG00000255197	AC090559.1	11	-	47381509	47409369	novel transcript	lncRNA	0.398338	1.12424e-13
ENSG00000217648	AL136116.3	6	+	143342246	143343383	pseudogene similar to presenilin associated, rhomboid-like PARL	processed_pseudogene	0.398304	3.62065e-07
ENSG00000204131	NHSL2	X	+	71910818	72161750	NHS like 2 [Source:HGNC Symbol;Acc:HGNC:33737]	protein_coding	0.39816	2.22171e-45
ENSG00000106605	BLVRA	7	+	43758680	43807342	biliverdin reductase A [Source:HGNC Symbol;Acc:HGNC:1062]	protein_coding	0.397686	2.43812e-217
ENSG00000134716	CYP2J2	1	-	59893308	59926773	cytochrome P450 family 2 subfamily J member 2 [Source:HGNC Symbol;Acc:HGNC:2634]	protein_coding	0.397557	8.80628e-09
ENSG00000110446	SLC15A3	11	-	60937084	60952530	solute carrier family 15 member 3 [Source:HGNC Symbol;Acc:HGNC:18068]	protein_coding	0.397457	1.07375e-79
ENSG00000205670	SMIM11A	21	+	34375480	34416961	small integral membrane protein 11A [Source:HGNC Symbol;Acc:HGNC:1293]	protein_coding	0.3974	1.80892e-07
ENSG00000188130	MAPK12	22	-	50245450	50261716	mitogen-activated protein kinase 12 [Source:HGNC Symbol;Acc:HGNC:6874]	protein_coding	0.397108	9.88057e-16
ENSG00000255248	MIR100HG	11	-	122028325	122556721	mir-100-let-7a-2-mir-125b-1 cluster host gene [Source:HGNC Symbol;Acc:HGNC:39522]	lncRNA	0.396971	1.85713e-160
ENSG00000175063	UBE2C	20	+	45812576	45816957	ubiquitin conjugating enzyme E2 C [Source:HGNC Symbol;Acc:HGNC:15937]	protein_coding	0.396566	4.56034e-12
ENSG00000131398	KCNC3	19	-	50311937	50333515	potassium voltage-gated channel subfamily C member 3 [Source:HGNC Symbol;Acc:HGNC:6235]	protein_coding	0.396493	4.4404e-16
ENSG00000255794	RMST	12	+	97430884	97598415	rhabdomyosarcoma 2 associated transcript [Source:HGNC Symbol;Acc:HGNC:29893]	lncRNA	0.396484	1.49124e-06
ENSG00000031081	ARHGAP31	3	+	119294383	119420714	Rho GTPase activating protein 31 [Source:HGNC Symbol;Acc:HGNC:29216]	protein_coding	0.396211	3.49692e-90
ENSG00000179314	WSCD1	17	+	6057807	6124427	WSC domain containing 1 [Source:HGNC Symbol;Acc:HGNC:29060]	protein_coding	0.395837	2.97447e-16
ENSG00000108387	SEPTIN4	17	-	58520250	58544368	septin 4 [Source:HGNC Symbol;Acc:HGNC:9165]	protein_coding	0.395681	1.43185e-69
ENSG00000139155	SLCO1C1	12	+	20695332	20753386	solute carrier organic anion transporter family member 1C1 [Source:HGNC Symbol;Acc:HGNC:13819]	protein_coding	0.395644	3.9577e-12
ENSG00000109790	KLHL5	4	+	39045039	39126857	kelch like family member 5 [Source:HGNC Symbol;Acc:HGNC:6356]	protein_coding	0.395468	8.4225e-84
ENSG00000262370	AC108134.3	16	-	3076911	3087111	novel transcript	lncRNA	0.395118	3.49245e-20
ENSG00000275620	FLJ16779	20	+	63253978	63261615	uncharacterized LOC100192386 [Source:NCBI gene (formerly Entrezgene);Acc:100192386]	lncRNA	0.394922	1.17277e-17
ENSG00000124731	TREM1	6	-	41267926	41286682	triggering receptor expressed on myeloid cells 1 [Source:HGNC Symbol;Acc:HGNC:17760]	protein_coding	0.394743	9.30575e-10
ENSG00000166289	PLEKHF1	19	+	29665459	29675477	pleckstrin homology and FYVE domain containing 1 [Source:HGNC Symbol;Acc:HGNC:20764]	protein_coding	0.394661	1.15383e-59
ENSG00000164035	EMCN	4	-	100395341	100880126	endomucin [Source:HGNC Symbol;Acc:HGNC:16041]	protein_coding	0.39417	4.99366e-235
ENSG00000185338	SOCS1	16	-	11254408	11256204	suppressor of cytokine signaling 1 [Source:HGNC Symbol;Acc:HGNC:19383]	protein_coding	0.393908	5.70709e-11
ENSG00000198729	PPP1R14C	6	+	150143044	150250392	protein phosphatase 1 regulatory inhibitor subunit 14C [Source:HGNC Symbol;Acc:HGNC:14952]	protein_coding	0.393848	2.98414e-113
ENSG00000237515	SHISA9	16	+	12901598	13240416	shisa family member 9 [Source:HGNC Symbol;Acc:HGNC:37231]	protein_coding	0.393466	2.76356e-07
ENSG00000160050	CCDC28B	1	+	32200595	32205387	coiled-coil domain containing 28B [Source:HGNC Symbol;Acc:HGNC:28163]	protein_coding	0.393248	3.252e-17
ENSG00000169246	NPIPB3	16	-	21402237	21448567	nuclear pore complex interacting protein family member B3 [Source:HGNC Symbol;Acc:HGNC:28989]	protein_coding	0.393242	2.90755e-15
ENSG00000137491	SLCO2B1	11	+	75100563	75206549	solute carrier organic anion transporter family member 2B1 [Source:HGNC Symbol;Acc:HGNC:10962]	protein_coding	0.393157	6.29857e-139
ENSG00000143869	GDF7	2	+	20667144	20679243	growth differentiation factor 7 [Source:HGNC Symbol;Acc:HGNC:4222]	protein_coding	0.392943	4.70636e-12
ENSG00000103942	HOMER2	15	-	82836946	82986153	homer scaffold protein 2 [Source:HGNC Symbol;Acc:HGNC:17513]	protein_coding	0.392291	4.80248e-190
ENSG00000130307	USHBP1	19	-	17249171	17282786	USH1 protein network component harmonin binding protein 1 [Source:HGNC Symbol;Acc:HGNC:24058]	protein_coding	0.392249	2.74601e-17
ENSG00000187210	GCNT1	9	+	76419850	76651203	glucosaminyl (N-acetyl) transferase 1 [Source:HGNC Symbol;Acc:HGNC:4203]	protein_coding	0.391902	3.62105e-49
ENSG00000177283	FZD8	10	-	35638249	35642278	frizzled class receptor 8 [Source:HGNC Symbol;Acc:HGNC:4046]	protein_coding	0.391853	3.20004e-36
ENSG00000058085	LAMC2	1	+	183186238	183245127	laminin subunit gamma 2 [Source:HGNC Symbol;Acc:HGNC:6493]	protein_coding	0.391693	0
ENSG00000183918	SH2D1A	X	+	124227868	124373197	SH2 domain containing 1A [Source:HGNC Symbol;Acc:HGNC:10820]	protein_coding	0.391389	3.02484e-21
ENSG00000159212	CLIC6	21	+	34669389	34718227	chloride intracellular channel 6 [Source:HGNC Symbol;Acc:HGNC:2065]	protein_coding	0.390788	5.87034e-61
ENSG00000066629	EML1	14	+	99737693	99942060	EMAP like 1 [Source:HGNC Symbol;Acc:HGNC:3330]	protein_coding	0.390676	1.68526e-58
ENSG00000138829	FBN2	5	-	128257909	128659185	fibrillin 2 [Source:HGNC Symbol;Acc:HGNC:3604]	protein_coding	0.389842	6.7165e-24
ENSG00000163563	MNDA	1	+	158831351	158849506	myeloid cell nuclear differentiation antigen [Source:HGNC Symbol;Acc:HGNC:7183]	protein_coding	0.38949	2.68311e-49
ENSG00000140859	KIFC3	16	-	57758217	57863053	kinesin family member C3 [Source:HGNC Symbol;Acc:HGNC:6326]	protein_coding	0.389366	5.02e-135
ENSG00000111052	LIN7A	12	-	80792520	80937925	lin-7 homolog A, crumbs cell polarity complex component [Source:HGNC Symbol;Acc:HGNC:17787]	protein_coding	0.389143	4.40162e-15
ENSG00000138185	ENTPD1	10	+	95711779	95877266	ectonucleoside triphosphate diphosphohydrolase 1 [Source:HGNC Symbol;Acc:HGNC:3363]	protein_coding	0.388929	3.76901e-279
ENSG00000188060	RAB42	1	+	28592200	28595443	RAB42, member RAS oncogene family [Source:HGNC Symbol;Acc:HGNC:28702]	protein_coding	0.388841	3.04057e-09
ENSG00000256940	PPP1R14B-AS1	11	+	64245961	64248218	PPP1R14B antisense RNA 1 [Source:HGNC Symbol;Acc:HGNC:54233]	lncRNA	0.388561	5.11515e-13
ENSG00000265206	AC004687.1	17	-	58330884	58332508	novel transcript, MIR142 host	lncRNA	0.388268	6.91419e-08
ENSG00000140287	HDC	15	-	50241947	50265965	histidine decarboxylase [Source:HGNC Symbol;Acc:HGNC:4855]	protein_coding	0.388183	3.00893e-34
ENSG00000111247	RAD51AP1	12	+	4538798	4560048	RAD51 associated protein 1 [Source:HGNC Symbol;Acc:HGNC:16956]	protein_coding	0.387947	1.30282e-17
ENSG00000245105	A2M-AS1	12	+	9065163	9068689	A2M antisense RNA 1 [Source:HGNC Symbol;Acc:HGNC:27057]	lncRNA	0.387864	3.4682e-06
ENSG00000101134	DOK5	20	+	54475593	54651169	docking protein 5 [Source:HGNC Symbol;Acc:HGNC:16173]	protein_coding	0.387341	2.5335e-06
ENSG00000267546	AC015802.4	17	-	76545668	76557683	novel transcript, antisense to PRCD	lncRNA	0.387333	3.71487e-06
ENSG00000086289	EPDR1	7	+	37683843	37951936	ependymin related 1 [Source:HGNC Symbol;Acc:HGNC:17572]	protein_coding	0.387183	1.4795e-46
ENSG00000135074	ADAM19	5	-	157395534	157575775	ADAM metallopeptidase domain 19 [Source:HGNC Symbol;Acc:HGNC:197]	protein_coding	0.387155	1.64392e-17
ENSG00000168356	SCN11A	3	-	38845764	39052157	sodium voltage-gated channel alpha subunit 11 [Source:HGNC Symbol;Acc:HGNC:10583]	protein_coding	0.386988	1.28717e-08
ENSG00000231312	MAP4K3-DT	2	+	39436530	39665343	MAP4K3 divergent transcript [Source:HGNC Symbol;Acc:HGNC:54056]	lncRNA	0.386933	8.90128e-29
ENSG00000074370	ATP2A3	17	-	3923870	3964464	ATPase sarcoplasmic/endoplasmic reticulum Ca2+ transporting 3 [Source:HGNC Symbol;Acc:HGNC:813]	protein_coding	0.386811	8.83471e-68
ENSG00000091972	CD200	3	+	112332347	112362812	CD200 molecule [Source:HGNC Symbol;Acc:HGNC:7203]	protein_coding	0.385806	9.73815e-50
ENSG00000166250	CLMP	11	-	123069872	123195248	CXADR like membrane protein [Source:HGNC Symbol;Acc:HGNC:24039]	protein_coding	0.385392	1.71235e-79
ENSG00000167767	KRT80	12	-	52168996	52192014	keratin 80 [Source:HGNC Symbol;Acc:HGNC:27056]	protein_coding	0.385128	2.00364e-48
ENSG00000260314	MRC1	10	+	17809348	17911164	mannose receptor C-type 1 [Source:HGNC Symbol;Acc:HGNC:7228]	protein_coding	0.3851	2.31898e-99
ENSG00000225792	AC004540.2	7	-	26369310	26376701	novel transcript	lncRNA	0.384608	9.92423e-08
ENSG00000167105	TMEM92	17	+	50271406	50281485	transmembrane protein 92 [Source:HGNC Symbol;Acc:HGNC:26579]	protein_coding	0.384323	1.62543e-06
ENSG00000263961	RHEX	1	+	206053173	206102449	regulator of hemoglobinization and erythroid cell expansion [Source:HGNC Symbol;Acc:HGNC:25341]	protein_coding	0.384013	2.42325e-20
ENSG00000106992	AK1	9	-	127866486	127877675	adenylate kinase 1 [Source:HGNC Symbol;Acc:HGNC:361]	protein_coding	0.38387	5.55184e-90
ENSG00000074590	NUAK1	12	-	106063340	106140033	NUAK family kinase 1 [Source:HGNC Symbol;Acc:HGNC:14311]	protein_coding	0.383613	3.85469e-102
ENSG00000072571	HMMR	5	+	163460203	163491941	hyaluronan mediated motility receptor [Source:HGNC Symbol;Acc:HGNC:5012]	protein_coding	0.383544	5.30671e-17
ENSG00000140931	CMTM3	16	+	66603874	66613892	CKLF like MARVEL transmembrane domain containing 3 [Source:HGNC Symbol;Acc:HGNC:19174]	protein_coding	0.383337	9.89229e-141
ENSG00000134330	IAH1	2	+	9473658	9496543	isoamyl acetate hydrolyzing esterase 1 (putative) [Source:HGNC Symbol;Acc:HGNC:27696]	protein_coding	0.383279	2.4347e-96
ENSG00000182010	RTKN2	10	-	62183035	62268844	rhotekin 2 [Source:HGNC Symbol;Acc:HGNC:19364]	protein_coding	0.383198	3.89533e-06
ENSG00000131724	IL13RA1	X	+	118727133	118794535	interleukin 13 receptor subunit alpha 1 [Source:HGNC Symbol;Acc:HGNC:5974]	protein_coding	0.382862	0
ENSG00000135002	RFK	9	-	76385526	76394517	riboflavin kinase [Source:HGNC Symbol;Acc:HGNC:30324]	protein_coding	0.382612	1.0241e-240
ENSG00000238113	LINC01410	9	+	62801461	62813486	long intergenic non-protein coding RNA 1410 [Source:HGNC Symbol;Acc:HGNC:50702]	lncRNA	0.382454	2.11243e-09
ENSG00000122786	CALD1	7	+	134744252	134970729	caldesmon 1 [Source:HGNC Symbol;Acc:HGNC:1441]	protein_coding	0.382185	0
ENSG00000133687	TMTC1	12	-	29500840	29784759	transmembrane O-mannosyltransferase targeting cadherins 1 [Source:HGNC Symbol;Acc:HGNC:24099]	protein_coding	0.382034	6.89249e-193
ENSG00000130513	GDF15	19	+	18374731	18389176	growth differentiation factor 15 [Source:HGNC Symbol;Acc:HGNC:30142]	protein_coding	0.38201	1.23486e-10
ENSG00000154146	NRGN	11	+	124739942	124747210	neurogranin [Source:HGNC Symbol;Acc:HGNC:8000]	protein_coding	0.381701	2.19314e-21
ENSG00000276085	CCL3L3	17	-	36194869	36196758	C-C motif chemokine ligand 3 like 3 [Source:HGNC Symbol;Acc:HGNC:30554]	protein_coding	0.381597	3.63608e-11
ENSG00000274536	MIR223HG	X	+	66015461	66020422	MIR223 host gene [Source:HGNC Symbol;Acc:HGNC:54520]	lncRNA	0.38116	5.32411e-07
ENSG00000126895	AVPR2	X	+	153902531	153907166	arginine vasopressin receptor 2 [Source:HGNC Symbol;Acc:HGNC:897]	protein_coding	0.381144	1.14223e-15
ENSG00000204282	TNRC6C-AS1	17	-	78107398	78111799	TNRC6C antisense RNA 1 [Source:HGNC Symbol;Acc:HGNC:44360]	lncRNA	0.381045	1.84215e-22
ENSG00000213967	ZNF726	19	+	23914876	23945159	zinc finger protein 726 [Source:HGNC Symbol;Acc:HGNC:32462]	protein_coding	0.380617	4.65574e-13
ENSG00000152804	HHEX	10	+	92689955	92695647	hematopoietically expressed homeobox [Source:HGNC Symbol;Acc:HGNC:4901]	protein_coding	0.380469	3.22636e-50
ENSG00000198892	SHISA4	1	+	201888680	201892587	shisa family member 4 [Source:HGNC Symbol;Acc:HGNC:27139]	protein_coding	0.380306	8.76698e-25
ENSG00000072832	CRMP1	4	-	5748084	5893086	collapsin response mediator protein 1 [Source:HGNC Symbol;Acc:HGNC:2365]	protein_coding	0.379779	5.28293e-15
ENSG00000102032	RENBP	X	-	153935269	153944687	renin binding protein [Source:HGNC Symbol;Acc:HGNC:9959]	protein_coding	0.379508	9.20691e-31
ENSG00000019582	CD74	5	-	150400041	150412929	CD74 molecule [Source:HGNC Symbol;Acc:HGNC:1697]	protein_coding	0.379052	0
ENSG00000104219	ZDHHC2	8	+	17156482	17224799	zinc finger DHHC-type palmitoyltransferase 2 [Source:HGNC Symbol;Acc:HGNC:18469]	protein_coding	0.378965	2.12537e-47
ENSG00000234636	MED14OS	X	+	40735400	40738701	MED14 opposite strand [Source:HGNC Symbol;Acc:HGNC:40162]	lncRNA	0.378955	3.38094e-06
ENSG00000105737	GRIK5	19	-	41998321	42069498	glutamate ionotropic receptor kainate type subunit 5 [Source:HGNC Symbol;Acc:HGNC:4583]	protein_coding	0.378759	7.60356e-09
ENSG00000085265	FCN1	9	-	134903232	134917912	ficolin 1 [Source:HGNC Symbol;Acc:HGNC:3623]	protein_coding	0.378552	6.58442e-20
ENSG00000145287	PLAC8	4	-	83090048	83137075	placenta associated 8 [Source:HGNC Symbol;Acc:HGNC:19254]	protein_coding	0.37838	3.54945e-21
ENSG00000109255	NMU	4	-	55595229	55636698	neuromedin U [Source:HGNC Symbol;Acc:HGNC:7859]	protein_coding	0.378345	8.45377e-17
ENSG00000285991	AL355312.5	6	-	149817937	149896011	novel transcript	protein_coding	0.378342	4.63615e-07
ENSG00000100364	KIAA0930	22	-	45190338	45240769	KIAA0930 [Source:HGNC Symbol;Acc:HGNC:1314]	protein_coding	0.378077	2.17303e-183
ENSG00000258498	DIO3OS	14	-	101552221	101560431	DIO3 opposite strand upstream RNA [Source:HGNC Symbol;Acc:HGNC:20348]	lncRNA	0.378058	1.69298e-22
ENSG00000213221	DNLZ	9	-	136359480	136363744	DNL-type zinc finger [Source:HGNC Symbol;Acc:HGNC:33879]	protein_coding	0.377446	8.31677e-22
ENSG00000149257	SERPINH1	11	+	75562056	75572783	serpin family H member 1 [Source:HGNC Symbol;Acc:HGNC:1546]	protein_coding	0.377332	1.30233e-292
ENSG00000118508	RAB32	6	+	146543833	146554953	RAB32, member RAS oncogene family [Source:HGNC Symbol;Acc:HGNC:9772]	protein_coding	0.377294	5.58737e-112
ENSG00000131620	ANO1	11	+	70078302	70189528	anoctamin 1 [Source:HGNC Symbol;Acc:HGNC:21625]	protein_coding	0.376798	2.91796e-130
ENSG00000148541	FAM13C	10	-	59246130	59363181	family with sequence similarity 13 member C [Source:HGNC Symbol;Acc:HGNC:19371]	protein_coding	0.376575	5.42043e-126
ENSG00000010671	BTK	X	-	101349447	101390796	Bruton tyrosine kinase [Source:HGNC Symbol;Acc:HGNC:1133]	protein_coding	0.376405	2.64257e-18
ENSG00000173269	MMRN2	10	-	86935540	86969481	multimerin 2 [Source:HGNC Symbol;Acc:HGNC:19888]	protein_coding	0.376397	6.2677e-145
ENSG00000216490	IFI30	19	+	18173162	18178117	IFI30 lysosomal thiol reductase [Source:HGNC Symbol;Acc:HGNC:5398]	protein_coding	0.376349	4.2534e-198
ENSG00000197381	ADARB1	21	+	45073853	45226560	adenosine deaminase RNA specific B1 [Source:HGNC Symbol;Acc:HGNC:226]	protein_coding	0.376288	1.22472e-85
ENSG00000043591	ADRB1	10	+	114043866	114046904	adrenoceptor beta 1 [Source:HGNC Symbol;Acc:HGNC:285]	protein_coding	0.376106	4.58535e-13
ENSG00000164403	SHROOM1	5	-	132822141	132830898	shroom family member 1 [Source:HGNC Symbol;Acc:HGNC:24084]	protein_coding	0.375707	8.59465e-29
ENSG00000259024	TVP23C-CDRT4	17	-	15436021	15563561	TVP23C-CDRT4 readthrough [Source:HGNC Symbol;Acc:HGNC:42961]	protein_coding	0.375502	3.24172e-57
ENSG00000135773	CAPN9	1	+	230747384	230802003	calpain 9 [Source:HGNC Symbol;Acc:HGNC:1486]	protein_coding	0.375337	2.28581e-06
ENSG00000148908	RGS10	10	-	119499817	119542719	regulator of G protein signaling 10 [Source:HGNC Symbol;Acc:HGNC:9992]	protein_coding	0.375202	9.64575e-92
ENSG00000135480	KRT7	12	+	52232520	52252186	keratin 7 [Source:HGNC Symbol;Acc:HGNC:6445]	protein_coding	0.374881	0
ENSG00000244682	FCGR2C	1	+	161581339	161605662	Fc fragment of IgG receptor IIc (gene/pseudogene) [Source:HGNC Symbol;Acc:HGNC:15626]	polymorphic_pseudogene	0.374609	3.28113e-51
ENSG00000146410	MTFR2	6	-	136231024	136250335	mitochondrial fission regulator 2 [Source:HGNC Symbol;Acc:HGNC:21115]	protein_coding	0.374427	2.92913e-06
ENSG00000110876	SELPLG	12	-	108621895	108633894	selectin P ligand [Source:HGNC Symbol;Acc:HGNC:10722]	protein_coding	0.374368	2.19964e-42
ENSG00000147509	RGS20	8	+	53851795	53959303	regulator of G protein signaling 20 [Source:HGNC Symbol;Acc:HGNC:14600]	protein_coding	0.374276	1.97799e-10
ENSG00000164850	GPER1	7	+	1082208	1093815	G protein-coupled estrogen receptor 1 [Source:HGNC Symbol;Acc:HGNC:4485]	protein_coding	0.373997	1.01268e-12
ENSG00000188015	S100A3	1	-	153547329	153549258	S100 calcium binding protein A3 [Source:HGNC Symbol;Acc:HGNC:10493]	protein_coding	0.373942	5.78697e-17
ENSG00000168734	PKIG	20	+	44531785	44624247	cAMP-dependent protein kinase inhibitor gamma [Source:HGNC Symbol;Acc:HGNC:9019]	protein_coding	0.373303	4.58464e-151
ENSG00000169783	LINGO1	15	-	77613027	77820900	leucine rich repeat and Ig domain containing 1 [Source:HGNC Symbol;Acc:HGNC:21205]	protein_coding	0.373077	1.15834e-12
ENSG00000169169	CPT1C	19	+	49690898	49713731	carnitine palmitoyltransferase 1C [Source:HGNC Symbol;Acc:HGNC:18540]	protein_coding	0.372939	8.49238e-23
ENSG00000109861	CTSC	11	-	88293592	88337761	cathepsin C [Source:HGNC Symbol;Acc:HGNC:2528]	protein_coding	0.372787	0
ENSG00000141753	IGFBP4	17	+	40443450	40457725	insulin like growth factor binding protein 4 [Source:HGNC Symbol;Acc:HGNC:5473]	protein_coding	0.372777	0
ENSG00000007933	FMO3	1	+	171090901	171117819	flavin containing dimethylaniline monoxygenase 3 [Source:HGNC Symbol;Acc:HGNC:3771]	protein_coding	0.37273	2.41139e-151
ENSG00000203778	FAM229B	6	+	112087591	112102790	family with sequence similarity 229 member B [Source:HGNC Symbol;Acc:HGNC:33858]	protein_coding	0.372626	1.25403e-14
ENSG00000166825	ANPEP	15	-	89784895	89815401	alanyl aminopeptidase, membrane [Source:HGNC Symbol;Acc:HGNC:500]	protein_coding	0.372543	2.84335e-59
ENSG00000184497	TMEM255B	13	+	113759226	113816995	transmembrane protein 255B [Source:HGNC Symbol;Acc:HGNC:28297]	protein_coding	0.372221	7.92e-61
ENSG00000179144	GIMAP7	7	+	150514872	150521073	GTPase, IMAP family member 7 [Source:HGNC Symbol;Acc:HGNC:22404]	protein_coding	0.371893	3.62854e-135
ENSG00000102981	PARD6A	16	+	67660946	67662778	par-6 family cell polarity regulator alpha [Source:HGNC Symbol;Acc:HGNC:15943]	protein_coding	0.371552	1.07439e-19
ENSG00000173110	HSPA6	1	+	161524540	161526894	heat shock protein family A (Hsp70) member 6 [Source:HGNC Symbol;Acc:HGNC:5239]	protein_coding	0.371435	2.99303e-20
ENSG00000163630	SYNPR	3	+	63228315	63616924	synaptoporin [Source:HGNC Symbol;Acc:HGNC:16507]	protein_coding	0.371162	1.1522e-26
ENSG00000166963	MAP1A	15	+	43510958	43531620	microtubule associated protein 1A [Source:HGNC Symbol;Acc:HGNC:6835]	protein_coding	0.371008	1.022e-52
ENSG00000167525	PROCA1	17	-	28703197	28711854	protein interacting with cyclin A1 [Source:HGNC Symbol;Acc:HGNC:28600]	protein_coding	0.370988	2.81207e-09
ENSG00000112562	SMOC2	6	+	168441151	168673445	SPARC related modular calcium binding 2 [Source:HGNC Symbol;Acc:HGNC:20323]	protein_coding	0.370226	3.32175e-152
ENSG00000189120	SP6	17	-	47844908	47855874	Sp6 transcription factor [Source:HGNC Symbol;Acc:HGNC:14530]	protein_coding	0.370214	6.36037e-08
ENSG00000186684	CYP27C1	2	-	127183832	127220313	cytochrome P450 family 27 subfamily C member 1 [Source:HGNC Symbol;Acc:HGNC:33480]	protein_coding	0.370058	2.63092e-48
ENSG00000165757	JCAD	10	-	30012803	30115494	junctional cadherin 5 associated [Source:HGNC Symbol;Acc:HGNC:29283]	protein_coding	0.369788	1.25381e-209
ENSG00000105894	PTN	7	-	137227341	137343774	pleiotrophin [Source:HGNC Symbol;Acc:HGNC:9630]	protein_coding	0.369665	1.29771e-285
ENSG00000085063	CD59	11	-	33703010	33736479	CD59 molecule (CD59 blood group) [Source:HGNC Symbol;Acc:HGNC:1689]	protein_coding	0.36965	0
ENSG00000178531	CTXN1	19	-	7924491	7926135	cortexin 1 [Source:HGNC Symbol;Acc:HGNC:31108]	protein_coding	0.369478	1.34221e-06
ENSG00000025708	TYMP	22	-	50525752	50530032	thymidine phosphorylase [Source:HGNC Symbol;Acc:HGNC:3148]	protein_coding	0.369419	0
ENSG00000079257	LXN	3	-	158645822	158672648	latexin [Source:HGNC Symbol;Acc:HGNC:13347]	protein_coding	0.369409	2.84108e-152
ENSG00000026025	VIM	10	+	17228241	17237593	vimentin [Source:HGNC Symbol;Acc:HGNC:12692]	protein_coding	0.369315	0
ENSG00000139899	CBLN3	14	-	24426545	24430954	cerebellin 3 precursor [Source:HGNC Symbol;Acc:HGNC:20146]	protein_coding	0.368806	1.43954e-16
ENSG00000012124	CD22	19	+	35319261	35347361	CD22 molecule [Source:HGNC Symbol;Acc:HGNC:1643]	protein_coding	0.368566	3.51892e-16
ENSG00000172260	NEGR1	1	-	71395943	72282539	neuronal growth regulator 1 [Source:HGNC Symbol;Acc:HGNC:17302]	protein_coding	0.368282	3.43694e-57
ENSG00000173917	HOXB2	17	-	48540894	48544989	homeobox B2 [Source:HGNC Symbol;Acc:HGNC:5113]	protein_coding	0.368097	1.28717e-08
ENSG00000155265	GOLGA7B	10	+	97849843	97871580	golgin A7 family member B [Source:HGNC Symbol;Acc:HGNC:31668]	protein_coding	0.367587	2.18813e-24
ENSG00000110237	ARHGEF17	11	+	73308276	73369388	Rho guanine nucleotide exchange factor 17 [Source:HGNC Symbol;Acc:HGNC:21726]	protein_coding	0.367321	6.51167e-74
ENSG00000140274	DUOXA2	15	+	45114326	45118421	dual oxidase maturation factor 2 [Source:HGNC Symbol;Acc:HGNC:32698]	protein_coding	0.367237	1.07439e-19
ENSG00000180730	SHISA2	13	-	26044597	26052016	shisa family member 2 [Source:HGNC Symbol;Acc:HGNC:20366]	protein_coding	0.366651	6.05215e-13
ENSG00000229526	KRT16P4	17	+	18450244	18475920	keratin 16 pseudogene 4 [Source:HGNC Symbol;Acc:HGNC:37809]	transcribed_processed_pseudogene	0.366418	4.14708e-23
ENSG00000176435	CLEC14A	14	-	38254000	38256093	C-type lectin domain containing 14A [Source:HGNC Symbol;Acc:HGNC:19832]	protein_coding	0.366172	1.94791e-107
ENSG00000171848	RRM2	2	+	10120698	10211725	ribonucleotide reductase regulatory subunit M2 [Source:HGNC Symbol;Acc:HGNC:10452]	protein_coding	0.365807	2.61584e-23
ENSG00000008517	IL32	16	+	3065297	3082192	interleukin 32 [Source:HGNC Symbol;Acc:HGNC:16830]	protein_coding	0.365429	6.53624e-180
ENSG00000101336	HCK	20	+	32052197	32101856	HCK proto-oncogene, Src family tyrosine kinase [Source:HGNC Symbol;Acc:HGNC:4840]	protein_coding	0.365403	1.23421e-36
ENSG00000272168	CASC15	6	+	21664185	22654455	cancer susceptibility 15 [Source:HGNC Symbol;Acc:HGNC:28245]	lncRNA	0.365156	1.47922e-13
ENSG00000184985	SORCS2	4	+	7192538	7742836	sortilin related VPS10 domain containing receptor 2 [Source:HGNC Symbol;Acc:HGNC:16698]	protein_coding	0.364676	9.17091e-14
ENSG00000160999	SH2B2	7	+	102285091	102321711	SH2B adaptor protein 2 [Source:HGNC Symbol;Acc:HGNC:17381]	protein_coding	0.36425	2.98728e-14
ENSG00000197332	AC008543.1	19	+	11639754	11686569	novel transcript	lncRNA	0.363997	9.30575e-10
ENSG00000103187	COTL1	16	-	84565596	84618078	coactosin like F-actin binding protein 1 [Source:HGNC Symbol;Acc:HGNC:18304]	protein_coding	0.363992	5.19556e-231
ENSG00000176532	PRR15	7	+	29563835	29567293	proline rich 15 [Source:HGNC Symbol;Acc:HGNC:22310]	protein_coding	0.363753	9.05431e-39
ENSG00000182218	HHIPL1	14	+	99645110	99680569	HHIP like 1 [Source:HGNC Symbol;Acc:HGNC:19710]	protein_coding	0.363581	7.36776e-14
ENSG00000182732	RGS6	14	+	71932429	72566530	regulator of G protein signaling 6 [Source:HGNC Symbol;Acc:HGNC:10002]	protein_coding	0.363521	7.12458e-09
ENSG00000165474	GJB2	13	-	20187463	20192938	gap junction protein beta 2 [Source:HGNC Symbol;Acc:HGNC:4284]	protein_coding	0.363013	0
ENSG00000166173	LARP6	15	-	70829130	70854157	La ribonucleoprotein 6, translational regulator [Source:HGNC Symbol;Acc:HGNC:24012]	protein_coding	0.362614	6.43198e-53
ENSG00000286185	AC242842.3	1	+	149390623	149556361	novel protein, identical to neuroblastoma breakpoint family, member 19 NBPF19	protein_coding	0.361933	1.1194e-92
ENSG00000160219	GAB3	X	-	154675249	154751583	GRB2 associated binding protein 3 [Source:HGNC Symbol;Acc:HGNC:17515]	protein_coding	0.361736	1.8125e-25
ENSG00000157554	ERG	21	-	38380027	38661780	ETS transcription factor ERG [Source:HGNC Symbol;Acc:HGNC:3446]	protein_coding	0.361592	3.87704e-141
ENSG00000185862	EVI2B	17	-	31303770	31314105	ecotropic viral integration site 2B [Source:HGNC Symbol;Acc:HGNC:3500]	protein_coding	0.361392	4.70938e-71
ENSG00000163638	ADAMTS9	3	-	64515654	64688000	ADAM metallopeptidase with thrombospondin type 1 motif 9 [Source:HGNC Symbol;Acc:HGNC:13202]	protein_coding	0.361379	2.77205e-121
ENSG00000256542	AC148477.2	12	+	132277349	132280900	novel transcript	lncRNA	0.361129	1.34546e-06
ENSG00000104043	ATP8B4	15	-	49858238	50182817	ATPase phospholipid transporting 8B4 (putative) [Source:HGNC Symbol;Acc:HGNC:13536]	protein_coding	0.361089	2.96655e-35
ENSG00000158555	GDPD5	11	-	75434640	75525941	glycerophosphodiester phosphodiesterase domain containing 5 [Source:HGNC Symbol;Acc:HGNC:28804]	protein_coding	0.360691	9.28954e-46
ENSG00000143119	CD53	1	+	110871188	110899922	CD53 molecule [Source:HGNC Symbol;Acc:HGNC:1686]	protein_coding	0.3604	3.68253e-133
ENSG00000172986	GXYLT2	3	+	72888046	72998138	glucoside xylosyltransferase 2 [Source:HGNC Symbol;Acc:HGNC:33383]	protein_coding	0.360044	9.18903e-27
ENSG00000165140	FBP1	9	-	94603133	94640249	fructose-bisphosphatase 1 [Source:HGNC Symbol;Acc:HGNC:3606]	protein_coding	0.359687	2.755e-55
ENSG00000138400	MDH1B	2	-	206737763	206765328	malate dehydrogenase 1B [Source:HGNC Symbol;Acc:HGNC:17836]	protein_coding	0.359539	1.11306e-06
ENSG00000228221	LINC00578	3	+	177441910	177767379	long intergenic non-protein coding RNA 578 [Source:HGNC Symbol;Acc:HGNC:43807]	lncRNA	0.359281	2.18237e-10
ENSG00000130303	BST2	19	-	17402939	17405630	bone marrow stromal cell antigen 2 [Source:HGNC Symbol;Acc:HGNC:1119]	protein_coding	0.359249	3.07056e-165
ENSG00000236914	LINC01852	15	-	38068812	38072990	long intergenic non-protein coding RNA 1852 [Source:HGNC Symbol;Acc:HGNC:52668]	lncRNA	0.359177	6.49938e-07
ENSG00000204577	LILRB3	19	-	54216278	54223506	leukocyte immunoglobulin like receptor B3 [Source:HGNC Symbol;Acc:HGNC:6607]	protein_coding	0.359172	4.02328e-10
ENSG00000284237	LINC02767	1	+	207959292	207969329	long intergenic non-protein coding RNA 2767 [Source:HGNC Symbol;Acc:HGNC:54287]	lncRNA	0.358826	3.23589e-11
ENSG00000167613	LAIR1	19	-	54351384	54370558	leukocyte associated immunoglobulin like receptor 1 [Source:HGNC Symbol;Acc:HGNC:6477]	protein_coding	0.3586	7.98555e-85
ENSG00000183098	GPC6	13	+	93226807	94408020	glypican 6 [Source:HGNC Symbol;Acc:HGNC:4454]	protein_coding	0.358479	2.49555e-52
ENSG00000182326	C1S	12	+	6988259	7071032	complement C1s [Source:HGNC Symbol;Acc:HGNC:1247]	protein_coding	0.35829	0
ENSG00000156298	TSPAN7	X	+	38561542	38688920	tetraspanin 7 [Source:HGNC Symbol;Acc:HGNC:11854]	protein_coding	0.358249	2.48677e-123
ENSG00000167261	DPEP2	16	-	67987394	68000586	dipeptidase 2 [Source:HGNC Symbol;Acc:HGNC:23028]	protein_coding	0.358211	6.23076e-18
ENSG00000154065	ANKRD29	18	-	23598926	23662911	ankyrin repeat domain 29 [Source:HGNC Symbol;Acc:HGNC:27110]	protein_coding	0.357988	1.99251e-66
ENSG00000106125	MINDY4	7	+	30771417	30892387	MINDY lysine 48 deubiquitinase 4 [Source:HGNC Symbol;Acc:HGNC:21916]	protein_coding	0.357843	4.4707e-35
ENSG00000138964	PARVG	22	+	44172956	44219533	parvin gamma [Source:HGNC Symbol;Acc:HGNC:14654]	protein_coding	0.357841	1.27124e-50
ENSG00000235531	MSC-AS1	8	+	71828167	72118393	MSC antisense RNA 1 [Source:HGNC Symbol;Acc:HGNC:48724]	lncRNA	0.357815	3.76045e-25
ENSG00000105639	JAK3	19	-	17824780	17848071	Janus kinase 3 [Source:HGNC Symbol;Acc:HGNC:6193]	protein_coding	0.357533	1.26874e-39
ENSG00000172578	KLHL6	3	-	183487551	183555706	kelch like family member 6 [Source:HGNC Symbol;Acc:HGNC:18653]	protein_coding	0.357151	3.73532e-24
ENSG00000106565	TMEM176B	7	-	150791285	150801360	transmembrane protein 176B [Source:HGNC Symbol;Acc:HGNC:29596]	protein_coding	0.357034	2.95487e-149
ENSG00000152270	PDE3B	11	+	14643804	14872044	phosphodiesterase 3B [Source:HGNC Symbol;Acc:HGNC:8779]	protein_coding	0.356875	2.59722e-25
ENSG00000170624	SGCD	5	+	155870344	156767788	sarcoglycan delta [Source:HGNC Symbol;Acc:HGNC:10807]	protein_coding	0.356859	1.54875e-67
ENSG00000187479	C11orf96	11	+	43925342	43943878	chromosome 11 open reading frame 96 [Source:HGNC Symbol;Acc:HGNC:38675]	protein_coding	0.356653	6.08933e-52
ENSG00000165507	DEPP1	10	-	44970981	44978809	DEPP1 autophagy regulator [Source:HGNC Symbol;Acc:HGNC:23355]	protein_coding	0.356454	6.99949e-135
ENSG00000166482	MFAP4	17	-	19383442	19387190	microfibril associated protein 4 [Source:HGNC Symbol;Acc:HGNC:7035]	protein_coding	0.356348	0
ENSG00000187151	ANGPTL5	11	-	101890674	101916522	angiopoietin like 5 [Source:HGNC Symbol;Acc:HGNC:19705]	protein_coding	0.355749	2.79599e-111
ENSG00000182963	GJC1	17	-	44798448	44830816	gap junction protein gamma 1 [Source:HGNC Symbol;Acc:HGNC:4280]	protein_coding	0.355697	8.32701e-47
ENSG00000172183	ISG20	15	+	88636153	88656483	interferon stimulated exonuclease gene 20 [Source:HGNC Symbol;Acc:HGNC:6130]	protein_coding	0.355631	6.8401e-37
ENSG00000111674	ENO2	12	+	6913745	6923698	enolase 2 [Source:HGNC Symbol;Acc:HGNC:3353]	protein_coding	0.3555	5.85283e-29
ENSG00000133475	GGT2	22	-	21207973	21227637	gamma-glutamyltransferase 2 [Source:HGNC Symbol;Acc:HGNC:4251]	protein_coding	0.355356	1.30093e-08
ENSG00000100599	RIN3	14	+	92513781	92688994	Ras and Rab interactor 3 [Source:HGNC Symbol;Acc:HGNC:18751]	protein_coding	0.35529	1.46142e-59
ENSG00000101194	SLC17A9	20	+	62952707	62969585	solute carrier family 17 member 9 [Source:HGNC Symbol;Acc:HGNC:16192]	protein_coding	0.355013	2.31722e-21
ENSG00000111644	ACRBP	12	-	6638075	6647433	acrosin binding protein [Source:HGNC Symbol;Acc:HGNC:17195]	protein_coding	0.354897	3.29205e-09
ENSG00000203797	DDO	6	-	110391771	110415575	D-aspartate oxidase [Source:HGNC Symbol;Acc:HGNC:2727]	protein_coding	0.354287	6.34955e-12
ENSG00000154783	FGD5	3	+	14810853	14934571	FYVE, RhoGEF and PH domain containing 5 [Source:HGNC Symbol;Acc:HGNC:19117]	protein_coding	0.354269	8.75811e-138
ENSG00000165730	STOX1	10	+	68827531	68895432	storkhead box 1 [Source:HGNC Symbol;Acc:HGNC:23508]	protein_coding	0.354104	2.05594e-06
ENSG00000167208	SNX20	16	-	50666300	50681353	sorting nexin 20 [Source:HGNC Symbol;Acc:HGNC:30390]	protein_coding	0.354011	2.85476e-25
ENSG00000183010	PYCR1	17	-	81932384	81942412	pyrroline-5-carboxylate reductase 1 [Source:HGNC Symbol;Acc:HGNC:9721]	protein_coding	0.353903	2.43771e-43
ENSG00000180532	ZSCAN4	19	+	57668935	57679152	zinc finger and SCAN domain containing 4 [Source:HGNC Symbol;Acc:HGNC:23709]	protein_coding	0.353535	1.20193e-06
ENSG00000106511	MEOX2	7	-	15611212	15686683	mesenchyme homeobox 2 [Source:HGNC Symbol;Acc:HGNC:7014]	protein_coding	0.353116	1.43717e-52
ENSG00000115226	FNDC4	2	-	27491883	27495200	fibronectin type III domain containing 4 [Source:HGNC Symbol;Acc:HGNC:20239]	protein_coding	0.352434	5.04882e-34
ENSG00000115896	PLCL1	2	+	197804593	198572581	phospholipase C like 1 (inactive) [Source:HGNC Symbol;Acc:HGNC:9063]	protein_coding	0.352011	4.09199e-25
ENSG00000122176	FMOD	1	-	203340628	203351758	fibromodulin [Source:HGNC Symbol;Acc:HGNC:3774]	protein_coding	0.351263	0
ENSG00000160408	ST6GALNAC6	9	-	127885321	127905408	ST6 N-acetylgalactosaminide alpha-2,6-sialyltransferase 6 [Source:HGNC Symbol;Acc:HGNC:23364]	protein_coding	0.351142	0
ENSG00000003147	ICA1	7	-	8113184	8262687	islet cell autoantigen 1 [Source:HGNC Symbol;Acc:HGNC:5343]	protein_coding	0.35108	5.81072e-64
ENSG00000129467	ADCY4	14	-	24318349	24335093	adenylate cyclase 4 [Source:HGNC Symbol;Acc:HGNC:235]	protein_coding	0.350926	9.71757e-83
ENSG00000105270	CLIP3	19	-	36014660	36033343	CAP-Gly domain containing linker protein 3 [Source:HGNC Symbol;Acc:HGNC:24314]	protein_coding	0.350853	4.65653e-23
ENSG00000105559	PLEKHA4	19	-	48837097	48868617	pleckstrin homology domain containing A4 [Source:HGNC Symbol;Acc:HGNC:14339]	protein_coding	0.350794	1.09558e-250
ENSG00000106560	GIMAP2	7	+	150685697	150693641	GTPase, IMAP family member 2 [Source:HGNC Symbol;Acc:HGNC:21789]	protein_coding	0.350651	2.41689e-62
ENSG00000204482	LST1	6	+	31586124	31588909	leukocyte specific transcript 1 [Source:HGNC Symbol;Acc:HGNC:14189]	protein_coding	0.35023	1.0067e-49
ENSG00000127074	RGS13	1	+	192636138	192660306	regulator of G protein signaling 13 [Source:HGNC Symbol;Acc:HGNC:9995]	protein_coding	0.350208	1.27653e-13
ENSG00000135917	SLC19A3	2	-	227683763	227718028	solute carrier family 19 member 3 [Source:HGNC Symbol;Acc:HGNC:16266]	protein_coding	0.34971	1.62515e-12
ENSG00000138180	CEP55	10	+	93496612	93529092	centrosomal protein 55 [Source:HGNC Symbol;Acc:HGNC:1161]	protein_coding	0.34969	1.44835e-18
ENSG00000134516	DOCK2	5	+	169637268	170083382	dedicator of cytokinesis 2 [Source:HGNC Symbol;Acc:HGNC:2988]	protein_coding	0.349183	1.71888e-47
ENSG00000137834	SMAD6	15	+	66702236	66782849	SMAD family member 6 [Source:HGNC Symbol;Acc:HGNC:6772]	protein_coding	0.349002	3.01957e-41
ENSG00000267934	AC010300.1	19	+	23323968	23329101	novel transcript, antisense to ZNF91	lncRNA	0.348885	5.5071e-07
ENSG00000153904	DDAH1	1	-	85318481	85578363	dimethylarginine dimethylaminohydrolase 1 [Source:HGNC Symbol;Acc:HGNC:2715]	protein_coding	0.348681	4.86539e-52
ENSG00000132170	PPARG	3	+	12287368	12434356	peroxisome proliferator activated receptor gamma [Source:HGNC Symbol;Acc:HGNC:9236]	protein_coding	0.348625	9.12193e-12
ENSG00000092853	CLSPN	1	-	35720218	35769978	claspin [Source:HGNC Symbol;Acc:HGNC:19715]	protein_coding	0.348539	6.79387e-13
ENSG00000214856	KRT16P1	17	+	18432051	18442895	keratin 16 pseudogene 1 [Source:HGNC Symbol;Acc:HGNC:6420]	transcribed_unprocessed_pseudogene	0.348187	1.8625e-31
ENSG00000162814	SPATA17	1	+	217631324	217871696	spermatogenesis associated 17 [Source:HGNC Symbol;Acc:HGNC:25184]	protein_coding	0.348145	4.75769e-08
ENSG00000089820	ARHGAP4	X	-	153907367	153934999	Rho GTPase activating protein 4 [Source:HGNC Symbol;Acc:HGNC:674]	protein_coding	0.348119	2.76056e-96
ENSG00000163453	IGFBP7	4	-	57030773	57110385	insulin like growth factor binding protein 7 [Source:HGNC Symbol;Acc:HGNC:5476]	protein_coding	0.347908	0
ENSG00000116194	ANGPTL1	1	-	178849535	178871077	angiopoietin like 1 [Source:HGNC Symbol;Acc:HGNC:489]	protein_coding	0.347473	3.23612e-97
ENSG00000173391	OLR1	12	-	10158301	10172138	oxidized low density lipoprotein receptor 1 [Source:HGNC Symbol;Acc:HGNC:8133]	protein_coding	0.346858	2.28572e-14
ENSG00000183682	BMP8A	1	+	39491636	39529869	bone morphogenetic protein 8a [Source:HGNC Symbol;Acc:HGNC:21650]	protein_coding	0.346845	3.02791e-06
ENSG00000163618	CADPS	3	-	62398346	62875416	calcium dependent secretion activator [Source:HGNC Symbol;Acc:HGNC:1426]	protein_coding	0.346735	5.56267e-07
ENSG00000185482	STAC3	12	-	57243453	57251188	SH3 and cysteine rich domain 3 [Source:HGNC Symbol;Acc:HGNC:28423]	protein_coding	0.346591	6.57543e-21
ENSG00000119686	FLVCR2	14	+	75578620	75663214	FLVCR heme transporter 2 [Source:HGNC Symbol;Acc:HGNC:20105]	protein_coding	0.346461	1.85564e-12
ENSG00000120913	PDLIM2	8	+	22578279	22598025	PDZ and LIM domain 2 [Source:HGNC Symbol;Acc:HGNC:13992]	protein_coding	0.346134	1.20965e-140
ENSG00000135052	GOLM1	9	-	86026146	86100173	golgi membrane protein 1 [Source:HGNC Symbol;Acc:HGNC:15451]	protein_coding	0.346027	0
ENSG00000126759	CFP	X	-	47623172	47630305	complement factor properdin [Source:HGNC Symbol;Acc:HGNC:8864]	protein_coding	0.346021	1.15174e-14
ENSG00000100448	CTSG	14	-	24573518	24576250	cathepsin G [Source:HGNC Symbol;Acc:HGNC:2532]	protein_coding	0.345878	1.3639e-100
ENSG00000133019	CHRM3	1	+	239386565	239915452	cholinergic receptor muscarinic 3 [Source:HGNC Symbol;Acc:HGNC:1952]	protein_coding	0.345837	1.70109e-09
ENSG00000196381	ZNF781	19	-	37667751	37692315	zinc finger protein 781 [Source:HGNC Symbol;Acc:HGNC:26745]	protein_coding	0.345176	6.14599e-08
ENSG00000221955	SLC12A8	3	-	125082636	125212864	solute carrier family 12 member 8 [Source:HGNC Symbol;Acc:HGNC:15595]	protein_coding	0.345166	3.56434e-48
ENSG00000205562	AL049775.1	14	-	85518871	85531585	novel transcript	lncRNA	0.344776	3.47918e-08
ENSG00000145861	C1QTNF2	5	-	160347754	160370641	C1q and TNF related 2 [Source:HGNC Symbol;Acc:HGNC:14325]	protein_coding	0.344428	4.81725e-44
ENSG00000160593	JAML	11	-	118193725	118225094	junction adhesion molecule like [Source:HGNC Symbol;Acc:HGNC:19084]	protein_coding	0.344238	5.40695e-98
ENSG00000110328	GALNT18	11	-	11270877	11622005	polypeptide N-acetylgalactosaminyltransferase 18 [Source:HGNC Symbol;Acc:HGNC:30488]	protein_coding	0.344205	1.75878e-151
ENSG00000142156	COL6A1	21	+	45981769	46005050	collagen type VI alpha 1 chain [Source:HGNC Symbol;Acc:HGNC:2211]	protein_coding	0.344198	0
ENSG00000099812	MISP	19	+	751112	764318	mitotic spindle positioning [Source:HGNC Symbol;Acc:HGNC:27000]	protein_coding	0.344175	9.52804e-53
ENSG00000203706	SERTAD4-AS1	1	-	210231456	210234047	SERTAD4 antisense RNA 1 [Source:HGNC Symbol;Acc:HGNC:32019]	lncRNA	0.34339	1.07332e-30
ENSG00000121742	GJB6	13	-	20221962	20232365	gap junction protein beta 6 [Source:HGNC Symbol;Acc:HGNC:4288]	protein_coding	0.343289	0
ENSG00000148948	LRRC4C	11	-	40114203	41459773	leucine rich repeat containing 4C [Source:HGNC Symbol;Acc:HGNC:29317]	protein_coding	0.343053	1.78557e-16
ENSG00000184489	PTP4A3	8	+	141391995	141432454	protein tyrosine phosphatase 4A3 [Source:HGNC Symbol;Acc:HGNC:9636]	protein_coding	0.342681	3.29482e-67
ENSG00000065923	SLC9A7	X	-	46599251	46759118	solute carrier family 9 member A7 [Source:HGNC Symbol;Acc:HGNC:17123]	protein_coding	0.342677	2.29488e-53
ENSG00000157456	CCNB2	15	+	59105126	59125045	cyclin B2 [Source:HGNC Symbol;Acc:HGNC:1580]	protein_coding	0.342394	2.01728e-09
ENSG00000198108	CHSY3	5	+	129904465	130186634	chondroitin sulfate synthase 3 [Source:HGNC Symbol;Acc:HGNC:24293]	protein_coding	0.341583	1.0836e-27
ENSG00000131080	EDA2R	X	-	66595637	66639298	ectodysplasin A2 receptor [Source:HGNC Symbol;Acc:HGNC:17756]	protein_coding	0.341123	9.19281e-43
ENSG00000115594	IL1R1	2	+	102064544	102179874	interleukin 1 receptor type 1 [Source:HGNC Symbol;Acc:HGNC:5993]	protein_coding	0.341009	0
ENSG00000167207	NOD2	16	+	50693588	50734041	nucleotide binding oligomerization domain containing 2 [Source:HGNC Symbol;Acc:HGNC:5331]	protein_coding	0.340684	5.7315e-14
ENSG00000233077	LINC01271	20	-	50310711	50321342	long intergenic non-protein coding RNA 1271 [Source:HGNC Symbol;Acc:HGNC:50327]	lncRNA	0.340473	1.4373e-06
ENSG00000226015	CCT8P1	1	-	147203276	147204932	chaperonin containing TCP1 subunit 8 pseudogene 1 [Source:HGNC Symbol;Acc:HGNC:35144]	processed_pseudogene	0.340288	1.07076e-08
ENSG00000164318	EGFLAM	5	+	38258409	38465480	EGF like, fibronectin type III and laminin G domains [Source:HGNC Symbol;Acc:HGNC:26810]	protein_coding	0.340271	6.96524e-44
ENSG00000133816	MICAL2	11	+	12094008	12359144	microtubule associated monooxygenase, calponin and LIM domain containing 2 [Source:HGNC Symbol;Acc:HGNC:24693]	protein_coding	0.339974	1.33203e-150
ENSG00000223478	AL441992.1	9	+	128724445	128733194	novel transcript	lncRNA	0.339933	3.71959e-23
ENSG00000120341	SEC16B	1	-	177923956	177984303	SEC16 homolog B, endoplasmic reticulum export factor [Source:HGNC Symbol;Acc:HGNC:30301]	protein_coding	0.33964	1.36451e-72
ENSG00000187688	TRPV2	17	+	16415571	16437003	transient receptor potential cation channel subfamily V member 2 [Source:HGNC Symbol;Acc:HGNC:18082]	protein_coding	0.339634	2.4829e-46
ENSG00000204301	NOTCH4	6	-	32194843	32224067	notch receptor 4 [Source:HGNC Symbol;Acc:HGNC:7884]	protein_coding	0.339558	3.01e-56
ENSG00000250682	LINC00491	5	-	102604220	102671765	long intergenic non-protein coding RNA 491 [Source:HGNC Symbol;Acc:HGNC:43428]	lncRNA	0.339515	1.27456e-09
ENSG00000141756	FKBP10	17	+	41812680	41823213	FKBP prolyl isomerase 10 [Source:HGNC Symbol;Acc:HGNC:18169]	protein_coding	0.339452	1.08921e-215
ENSG00000018280	SLC11A1	2	+	218382029	218396894	solute carrier family 11 member 1 [Source:HGNC Symbol;Acc:HGNC:10907]	protein_coding	0.339359	1.7999e-09
ENSG00000104967	NOVA2	19	-	45933734	45974044	NOVA alternative splicing regulator 2 [Source:HGNC Symbol;Acc:HGNC:7887]	protein_coding	0.339236	1.45504e-07
ENSG00000165810	BTNL9	5	+	181040225	181061521	butyrophilin like 9 [Source:HGNC Symbol;Acc:HGNC:24176]	protein_coding	0.338937	9.92696e-13
ENSG00000261934	PCDHGA9	5	+	141402932	141512979	protocadherin gamma subfamily A, 9 [Source:HGNC Symbol;Acc:HGNC:8707]	protein_coding	0.338929	2.90821e-19
ENSG00000173890	GPR160	3	+	170037995	170085392	G protein-coupled receptor 160 [Source:HGNC Symbol;Acc:HGNC:23693]	protein_coding	0.338543	5.70639e-20
ENSG00000265485	LINC01915	18	+	24534551	24708542	long intergenic non-protein coding RNA 1915 [Source:HGNC Symbol;Acc:HGNC:52734]	lncRNA	0.338526	9.7398e-09
ENSG00000158481	CD1C	1	+	158289923	158294774	CD1c molecule [Source:HGNC Symbol;Acc:HGNC:1636]	protein_coding	0.337753	9.61103e-38
ENSG00000106541	AGR2	7	-	16791811	16833433	anterior gradient 2, protein disulphide isomerase family member [Source:HGNC Symbol;Acc:HGNC:328]	protein_coding	0.336934	0
ENSG00000203747	FCGR3A	1	-	161541759	161550737	Fc fragment of IgG receptor IIIa [Source:HGNC Symbol;Acc:HGNC:3619]	protein_coding	0.336761	6.41073e-121
ENSG00000236849	LINC01474	9	-	72871130	72874135	long intergenic non-protein coding RNA 1474 [Source:HGNC Symbol;Acc:HGNC:51111]	lncRNA	0.336484	4.22287e-29
ENSG00000181350	LRRC75A	17	-	16441577	16492193	leucine rich repeat containing 75A [Source:HGNC Symbol;Acc:HGNC:32403]	protein_coding	0.336365	7.58585e-53
ENSG00000126264	HCST	19	+	35902529	35904377	hematopoietic cell signal transducer [Source:HGNC Symbol;Acc:HGNC:16977]	protein_coding	0.336323	9.89734e-26
ENSG00000176136	MC5R	18	+	13824149	13827323	melanocortin 5 receptor [Source:HGNC Symbol;Acc:HGNC:6933]	protein_coding	0.336072	2.30493e-07
ENSG00000158477	CD1A	1	+	158254424	158258269	CD1a molecule [Source:HGNC Symbol;Acc:HGNC:1634]	protein_coding	0.335478	1.07076e-08
ENSG00000164176	EDIL3	5	-	83940554	84384880	EGF like repeats and discoidin domains 3 [Source:HGNC Symbol;Acc:HGNC:3173]	protein_coding	0.335136	9.09428e-223
ENSG00000198483	ANKRD35	1	-	145866560	145885866	ankyrin repeat domain 35 [Source:HGNC Symbol;Acc:HGNC:26323]	protein_coding	0.335	2.82604e-112
ENSG00000167850	CD300C	17	-	74541073	74546115	CD300c molecule [Source:HGNC Symbol;Acc:HGNC:19320]	protein_coding	0.334626	8.93511e-08
ENSG00000138449	SLC40A1	2	-	189560590	189583758	solute carrier family 40 member 1 [Source:HGNC Symbol;Acc:HGNC:10909]	protein_coding	0.33456	0
ENSG00000168874	ATOH8	2	+	85751344	85791383	atonal bHLH transcription factor 8 [Source:HGNC Symbol;Acc:HGNC:24126]	protein_coding	0.334531	1.42615e-40
ENSG00000151650	VENTX	10	+	133237855	133241928	VENT homeobox [Source:HGNC Symbol;Acc:HGNC:13639]	protein_coding	0.333833	1.44753e-09
ENSG00000164742	ADCY1	7	+	45574140	45723116	adenylate cyclase 1 [Source:HGNC Symbol;Acc:HGNC:232]	protein_coding	0.333692	1.7961e-13
ENSG00000166582	CENPV	17	-	16342534	16353656	centromere protein V [Source:HGNC Symbol;Acc:HGNC:29920]	protein_coding	0.333469	3.00783e-16
ENSG00000273680	AC009318.2	12	-	29332733	29333383	novel transcript, antisense to FAR2	lncRNA	0.333364	1.15095e-09
ENSG00000145362	ANK2	4	+	112818032	113384221	ankyrin 2 [Source:HGNC Symbol;Acc:HGNC:493]	protein_coding	0.333278	2.62174e-253
ENSG00000182771	GRID1	10	-	85599552	86366795	glutamate ionotropic receptor delta type subunit 1 [Source:HGNC Symbol;Acc:HGNC:4575]	protein_coding	0.33297	6.76004e-23
ENSG00000166592	RRAD	16	-	66921679	66925536	RRAD, Ras related glycolysis inhibitor and calcium channel regulator [Source:HGNC Symbol;Acc:HGNC:10446]	protein_coding	0.332694	9.39753e-17
ENSG00000204257	HLA-DMA	6	-	32948613	32969094	major histocompatibility complex, class II, DM alpha [Source:HGNC Symbol;Acc:HGNC:4934]	protein_coding	0.332482	5.93092e-307
ENSG00000173621	LRFN4	11	+	66856647	66860475	leucine rich repeat and fibronectin type III domain containing 4 [Source:HGNC Symbol;Acc:HGNC:28456]	protein_coding	0.33229	5.39733e-38
ENSG00000261505	AL031714.1	16	-	1317891	1322845	novel transcript, antisense to UBE2I	lncRNA	0.331732	4.05082e-12
ENSG00000152154	TMEM178A	2	+	39664982	39717963	transmembrane protein 178A [Source:HGNC Symbol;Acc:HGNC:28517]	protein_coding	0.331702	2.29392e-25
ENSG00000105696	TMEM59L	19	+	18607430	18621039	transmembrane protein 59 like [Source:HGNC Symbol;Acc:HGNC:13237]	protein_coding	0.331451	2.45462e-06
ENSG00000132481	TRIM47	17	-	75874164	75878581	tripartite motif containing 47 [Source:HGNC Symbol;Acc:HGNC:19020]	protein_coding	0.331193	6.78631e-112
ENSG00000246375	PPM1K-DT	4	+	88284507	88331421	PPM1K divergent transcript [Source:HGNC Symbol;Acc:HGNC:54093]	lncRNA	0.330979	5.24763e-08
ENSG00000135218	CD36	7	+	80369575	80679277	CD36 molecule [Source:HGNC Symbol;Acc:HGNC:1663]	protein_coding	0.330861	6.60525e-209
ENSG00000110324	IL10RA	11	+	117986370	118003037	interleukin 10 receptor subunit alpha [Source:HGNC Symbol;Acc:HGNC:5964]	protein_coding	0.330756	1.06922e-107
ENSG00000178226	PRSS36	16	-	31138926	31150083	serine protease 36 [Source:HGNC Symbol;Acc:HGNC:26906]	protein_coding	0.330447	3.54699e-17
ENSG00000204262	COL5A2	2	-	189031898	189225312	collagen type V alpha 2 chain [Source:HGNC Symbol;Acc:HGNC:2210]	protein_coding	0.330402	0
ENSG00000240399	AC004801.2	12	-	48054813	48055591	ribosomal protein L37 (RPL37) pseudogene	transcribed_processed_pseudogene	0.330227	8.3902e-09
ENSG00000140678	ITGAX	16	+	31355134	31382999	integrin subunit alpha X [Source:HGNC Symbol;Acc:HGNC:6152]	protein_coding	0.330116	1.38797e-61
ENSG00000121753	ADGRB2	1	-	31727117	31764893	adhesion G protein-coupled receptor B2 [Source:HGNC Symbol;Acc:HGNC:944]	protein_coding	0.329987	1.98438e-07
ENSG00000086730	LAT2	7	+	74199652	74229834	linker for activation of T cells family member 2 [Source:HGNC Symbol;Acc:HGNC:12749]	protein_coding	0.329931	4.37377e-54
ENSG00000197467	COL13A1	10	+	69801867	69964275	collagen type XIII alpha 1 chain [Source:HGNC Symbol;Acc:HGNC:2190]	protein_coding	0.329856	1.29235e-09
ENSG00000078053	AMPH	7	-	38383704	38631420	amphiphysin [Source:HGNC Symbol;Acc:HGNC:471]	protein_coding	0.329587	6.73211e-11
ENSG00000184254	ALDH1A3	15	+	100877714	100916626	aldehyde dehydrogenase 1 family member A3 [Source:HGNC Symbol;Acc:HGNC:409]	protein_coding	0.329558	0
ENSG00000112299	VNN1	6	-	132680849	132714055	vanin 1 [Source:HGNC Symbol;Acc:HGNC:12705]	protein_coding	0.329513	2.43322e-16
ENSG00000215475	SIAH3	13	-	45777242	45851753	siah E3 ubiquitin protein ligase family member 3 [Source:HGNC Symbol;Acc:HGNC:30553]	protein_coding	0.329194	3.57018e-12
ENSG00000148680	HTR7	10	-	90740823	90858039	5-hydroxytryptamine receptor 7 [Source:HGNC Symbol;Acc:HGNC:5302]	protein_coding	0.32912	3.96631e-07
ENSG00000267121	AC008105.3	17	-	45190931	45222222	novel transcript, antisense to FMNL1	lncRNA	0.328928	5.46032e-27
ENSG00000147676	MAL2	8	+	119165034	119245673	mal, T cell differentiation protein 2 (gene/pseudogene) [Source:HGNC Symbol;Acc:HGNC:13634]	protein_coding	0.32889	0
ENSG00000162444	RBP7	1	+	9997206	10016021	retinol binding protein 7 [Source:HGNC Symbol;Acc:HGNC:30316]	protein_coding	0.328864	3.10499e-30
ENSG00000135454	B4GALNT1	12	-	57623409	57633239	beta-1,4-N-acetyl-galactosaminyltransferase 1 [Source:HGNC Symbol;Acc:HGNC:4117]	protein_coding	0.328698	5.39141e-08
ENSG00000007908	SELE	1	-	169722640	169764705	selectin E [Source:HGNC Symbol;Acc:HGNC:10718]	protein_coding	0.3286	9.10008e-187
ENSG00000163606	CD200R1	3	-	112921205	112975103	CD200 receptor 1 [Source:HGNC Symbol;Acc:HGNC:24235]	protein_coding	0.327743	2.14846e-103
ENSG00000105808	RASA4	7	-	102573807	102616756	RAS p21 protein activator 4 [Source:HGNC Symbol;Acc:HGNC:23181]	protein_coding	0.327526	1.22082e-20
ENSG00000142279	WTIP	19	+	34481758	34512304	WT1 interacting protein [Source:HGNC Symbol;Acc:HGNC:20964]	protein_coding	0.327292	5.3381e-59
ENSG00000287839	AL353807.5	1	-	155626757	155637604	novel transcript	lncRNA	0.327141	2.40209e-14
ENSG00000123338	NCKAP1L	12	+	54497752	54548243	NCK associated protein 1 like [Source:HGNC Symbol;Acc:HGNC:4862]	protein_coding	0.32694	1.23325e-128
ENSG00000175857	GAPT	5	+	58491435	58497090	GRB2 binding adaptor protein, transmembrane [Source:HGNC Symbol;Acc:HGNC:26588]	protein_coding	0.326906	2.46618e-19
ENSG00000182162	P2RY8	X	-	1462581	1537185	P2Y receptor family member 8 [Source:HGNC Symbol;Acc:HGNC:15524]	protein_coding	0.32677	6.80952e-15
ENSG00000197182	MIRLET7BHG	22	+	46053869	46113928	MIRLET7B host gene [Source:HGNC Symbol;Acc:HGNC:37189]	lncRNA	0.326038	1.72373e-56
ENSG00000047617	ANO2	12	-	5531869	5946232	anoctamin 2 [Source:HGNC Symbol;Acc:HGNC:1183]	protein_coding	0.325674	4.90789e-11
ENSG00000243449	C4orf48	4	+	2041993	2043970	chromosome 4 open reading frame 48 [Source:HGNC Symbol;Acc:HGNC:34437]	protein_coding	0.325344	6.30946e-37
ENSG00000197043	ANXA6	5	-	151100706	151157785	annexin A6 [Source:HGNC Symbol;Acc:HGNC:544]	protein_coding	0.325276	0
ENSG00000244242	IFITM10	11	-	1732406	1750595	interferon induced transmembrane protein 10 [Source:HGNC Symbol;Acc:HGNC:40022]	protein_coding	0.325076	5.73407e-38
ENSG00000170537	TMC7	16	+	18983934	19063942	transmembrane channel like 7 [Source:HGNC Symbol;Acc:HGNC:23000]	protein_coding	0.325067	1.87018e-16
ENSG00000000971	CFH	1	+	196652043	196747504	complement factor H [Source:HGNC Symbol;Acc:HGNC:4883]	protein_coding	0.324726	0
ENSG00000131015	ULBP2	6	+	149942014	149949235	UL16 binding protein 2 [Source:HGNC Symbol;Acc:HGNC:14894]	protein_coding	0.32458	3.48492e-30
ENSG00000225511	LINC00475	9	+	92141298	92160114	long intergenic non-protein coding RNA 475 [Source:HGNC Symbol;Acc:HGNC:23569]	transcribed_unprocessed_pseudogene	0.324026	3.12179e-37
ENSG00000140368	PSTPIP1	15	+	76993359	77037475	proline-serine-threonine phosphatase interacting protein 1 [Source:HGNC Symbol;Acc:HGNC:9580]	protein_coding	0.324025	5.24351e-27
ENSG00000100276	RASL10A	22	-	29312933	29319679	RAS like family 10 member A [Source:HGNC Symbol;Acc:HGNC:16954]	protein_coding	0.323967	7.12458e-09
ENSG00000176485	PLAAT3	11	-	63573195	63616883	phospholipase A and acyltransferase 3 [Source:HGNC Symbol;Acc:HGNC:17825]	protein_coding	0.323934	7.25283e-67
ENSG00000175899	A2M	12	-	9067664	9116229	alpha-2-macroglobulin [Source:HGNC Symbol;Acc:HGNC:7]	protein_coding	0.323855	0
ENSG00000133328	PLAAT2	11	-	63552770	63563379	phospholipase A and acyltransferase 2 [Source:HGNC Symbol;Acc:HGNC:17824]	protein_coding	0.323641	1.42009e-46
ENSG00000267364	AC022706.1	17	+	35313479	35325449	novel transcript	lncRNA	0.322642	2.14146e-06
ENSG00000122870	BICC1	10	+	58512872	58831435	BicC family RNA binding protein 1 [Source:HGNC Symbol;Acc:HGNC:19351]	protein_coding	0.322596	5.12204e-135
ENSG00000269001	AC092070.2	19	+	53197111	53214522	zinc finger protein 818, pseudogene	transcribed_unprocessed_pseudogene	0.322548	1.98569e-130
ENSG00000224046	AC005076.1	7	-	87151422	87152420	novel transcript, antisense to DMTF1	lncRNA	0.321712	1.76414e-06
ENSG00000106823	ECM2	9	-	92493554	92536655	extracellular matrix protein 2 [Source:HGNC Symbol;Acc:HGNC:3154]	protein_coding	0.321397	4.67227e-194
ENSG00000150667	FSIP1	15	-	39588357	39782841	fibrous sheath interacting protein 1 [Source:HGNC Symbol;Acc:HGNC:21674]	protein_coding	0.320903	6.34796e-24
ENSG00000135643	KCNMB4	12	+	70366290	70434292	potassium calcium-activated channel subfamily M regulatory beta subunit 4 [Source:HGNC Symbol;Acc:HGNC:6289]	protein_coding	0.320589	1.62324e-29
ENSG00000198682	PAPSS2	10	+	87659613	87747705	3'-phosphoadenosine 5'-phosphosulfate synthase 2 [Source:HGNC Symbol;Acc:HGNC:8604]	protein_coding	0.320546	4.50271e-69
ENSG00000122367	LDB3	10	+	86668507	86736072	LIM domain binding 3 [Source:HGNC Symbol;Acc:HGNC:15710]	protein_coding	0.320372	2.85407e-10
ENSG00000154553	PDLIM3	4	-	185500660	185535507	PDZ and LIM domain 3 [Source:HGNC Symbol;Acc:HGNC:20767]	protein_coding	0.319988	2.22762e-159
ENSG00000135835	KIAA1614	1	+	180912897	180951614	KIAA1614 [Source:HGNC Symbol;Acc:HGNC:29327]	protein_coding	0.319919	4.74982e-23
ENSG00000120820	GLT8D2	12	-	103988984	104064183	glycosyltransferase 8 domain containing 2 [Source:HGNC Symbol;Acc:HGNC:24890]	protein_coding	0.319776	1.13922e-187
ENSG00000118292	C1orf54	1	+	150268200	150280916	chromosome 1 open reading frame 54 [Source:HGNC Symbol;Acc:HGNC:26258]	protein_coding	0.319616	1.18413e-32
ENSG00000158186	MRAS	3	+	138347648	138405534	muscle RAS oncogene homolog [Source:HGNC Symbol;Acc:HGNC:7227]	protein_coding	0.319595	3.92965e-93
ENSG00000100336	APOL4	22	-	36189124	36204840	apolipoprotein L4 [Source:HGNC Symbol;Acc:HGNC:14867]	protein_coding	0.319334	5.50339e-62
ENSG00000119535	CSF3R	1	-	36466043	36483278	colony stimulating factor 3 receptor [Source:HGNC Symbol;Acc:HGNC:2439]	protein_coding	0.319315	3.1954e-37
ENSG00000244578	LINC01391	3	-	138935189	138944020	long intergenic non-protein coding RNA 1391 [Source:HGNC Symbol;Acc:HGNC:50666]	lncRNA	0.319179	2.39187e-08
ENSG00000286289	AL133482.1	10	-	113482069	113492054	novel transcript	lncRNA	0.318492	3.65835e-51
ENSG00000113494	PRLR	5	-	35048756	35230487	prolactin receptor [Source:HGNC Symbol;Acc:HGNC:9446]	protein_coding	0.318473	2.31724e-10
ENSG00000270571	AC007681.1	2	+	75154366	75189949	novel transcript, antisense to TACR1	lncRNA	0.318408	2.56628e-07
ENSG00000168306	ACOX2	3	-	58505136	58537283	acyl-CoA oxidase 2 [Source:HGNC Symbol;Acc:HGNC:120]	protein_coding	0.318243	1.91232e-18
ENSG00000124839	RAB17	2	-	237574322	237601614	RAB17, member RAS oncogene family [Source:HGNC Symbol;Acc:HGNC:16523]	protein_coding	0.318209	1.36378e-54
ENSG00000142303	ADAMTS10	19	-	8580240	8610735	ADAM metallopeptidase with thrombospondin type 1 motif 10 [Source:HGNC Symbol;Acc:HGNC:13201]	protein_coding	0.31819	1.40489e-102
ENSG00000160183	TMPRSS3	21	-	42371887	42396091	transmembrane serine protease 3 [Source:HGNC Symbol;Acc:HGNC:11877]	protein_coding	0.318062	1.96107e-16
ENSG00000128606	LRRC17	7	+	102913000	102945111	leucine rich repeat containing 17 [Source:HGNC Symbol;Acc:HGNC:16895]	protein_coding	0.31778	8.54587e-157
ENSG00000106069	CHN2	7	+	29146569	29514328	chimerin 2 [Source:HGNC Symbol;Acc:HGNC:1944]	protein_coding	0.317372	8.24313e-25
ENSG00000235501	AC105942.1	1	+	94927361	94963616	novel transcript	lncRNA	0.317318	1.28884e-15
ENSG00000177133	PRDM16-DT	1	-	3059615	3068437	PRDM16 divergent transcript [Source:HGNC Symbol;Acc:HGNC:48664]	lncRNA	0.317198	3.89533e-06
ENSG00000142512	SIGLEC10	19	-	51410020	51417803	sialic acid binding Ig like lectin 10 [Source:HGNC Symbol;Acc:HGNC:15620]	protein_coding	0.316164	5.39263e-09
ENSG00000143248	RGS5	1	-	163111121	163321791	regulator of G protein signaling 5 [Source:HGNC Symbol;Acc:HGNC:10001]	protein_coding	0.316099	0
ENSG00000113739	STC2	5	-	173314713	173329503	stanniocalcin 2 [Source:HGNC Symbol;Acc:HGNC:11374]	protein_coding	0.315959	3.59978e-17
ENSG00000196739	COL27A1	9	+	114155537	114312511	collagen type XXVII alpha 1 chain [Source:HGNC Symbol;Acc:HGNC:22986]	protein_coding	0.315707	7.88079e-75
ENSG00000001561	ENPP4	6	+	46129989	46146688	ectonucleotide pyrophosphatase/phosphodiesterase 4 [Source:HGNC Symbol;Acc:HGNC:3359]	protein_coding	0.315424	1.72576e-129
ENSG00000197614	MFAP5	12	-	8637346	8662888	microfibril associated protein 5 [Source:HGNC Symbol;Acc:HGNC:29673]	protein_coding	0.314718	0
ENSG00000171004	HS6ST2	X	-	132626016	132961395	heparan sulfate 6-O-sulfotransferase 2 [Source:HGNC Symbol;Acc:HGNC:19133]	protein_coding	0.314528	2.60815e-24
ENSG00000134769	DTNA	18	+	34493290	34891844	dystrobrevin alpha [Source:HGNC Symbol;Acc:HGNC:3057]	protein_coding	0.314523	8.96871e-09
ENSG00000112759	SLC29A1	6	+	44219553	44234142	solute carrier family 29 member 1 (Augustine blood group) [Source:HGNC Symbol;Acc:HGNC:11003]	protein_coding	0.314484	8.69113e-221
ENSG00000160856	FCRL3	1	-	157674321	157700769	Fc receptor like 3 [Source:HGNC Symbol;Acc:HGNC:18506]	protein_coding	0.314296	2.82066e-06
ENSG00000104435	STMN2	8	+	79611117	79666158	stathmin 2 [Source:HGNC Symbol;Acc:HGNC:10577]	protein_coding	0.314285	6.29089e-08
ENSG00000090539	CHRD	3	+	184380073	184390736	chordin [Source:HGNC Symbol;Acc:HGNC:1949]	protein_coding	0.313932	3.03447e-61
ENSG00000260025	CRIM1-DT	2	-	36354749	36355114	CRIM1 divergent transcript [Source:HGNC Symbol;Acc:HGNC:54057]	lncRNA	0.313896	2.37931e-13
ENSG00000225210	DUXAP9	14	+	19062316	19131167	double homeobox A pseudogene 9 [Source:HGNC Symbol;Acc:HGNC:32188]	transcribed_processed_pseudogene	0.313767	9.53419e-09
ENSG00000284820	AC068946.2	2	-	219209772	219222738	novel protein	protein_coding	0.313759	2.18585e-70
ENSG00000169313	P2RY12	3	-	151336843	151384753	purinergic receptor P2Y12 [Source:HGNC Symbol;Acc:HGNC:18124]	protein_coding	0.313703	1.94401e-10
ENSG00000242147	LASTR	10	-	5594984	5632566	lncRNA associated with SART3 regulation of splicing [Source:HGNC Symbol;Acc:HGNC:54143]	lncRNA	0.313519	4.09628e-14
ENSG00000106333	PCOLCE	7	+	100602363	100608175	procollagen C-endopeptidase enhancer [Source:HGNC Symbol;Acc:HGNC:8738]	protein_coding	0.313486	0
ENSG00000221818	EBF2	8	-	25841725	26045413	EBF transcription factor 2 [Source:HGNC Symbol;Acc:HGNC:19090]	protein_coding	0.313361	7.4712e-13
ENSG00000267475	AC008736.1	19	-	32687089	32691750	novel transcript	lncRNA	0.313305	2.00655e-08
ENSG00000248144	ADH1C	4	-	99336497	99352746	alcohol dehydrogenase 1C (class I), gamma polypeptide [Source:HGNC Symbol;Acc:HGNC:251]	protein_coding	0.313278	1.55838e-44
ENSG00000177685	CRACR2B	11	+	826144	831991	calcium release activated channel regulator 2B [Source:HGNC Symbol;Acc:HGNC:28703]	protein_coding	0.313177	6.3565e-91
ENSG00000169508	GPR183	13	-	99294539	99307399	G protein-coupled receptor 183 [Source:HGNC Symbol;Acc:HGNC:3128]	protein_coding	0.312877	5.16734e-47
ENSG00000187837	H1-2	6	-	26055740	26056470	H1.2 linker histone, cluster member [Source:HGNC Symbol;Acc:HGNC:4716]	protein_coding	0.3128	5.27106e-44
ENSG00000244459	AC147067.1	4	-	1574062	1580253	novel transcript	lncRNA	0.31271	3.39943e-08
ENSG00000140379	BCL2A1	15	-	79960892	79971196	BCL2 related protein A1 [Source:HGNC Symbol;Acc:HGNC:991]	protein_coding	0.312602	3.42946e-16
ENSG00000019169	MARCO	2	+	118942166	118994660	macrophage receptor with collagenous structure [Source:HGNC Symbol;Acc:HGNC:6895]	protein_coding	0.312572	1.15976e-17
ENSG00000284797	AC008397.1	19	-	18249950	18255419	novel protein	protein_coding	0.31219	3.02791e-06
ENSG00000204176	SYT15	10	+	46578217	46594173	synaptotagmin 15 [Source:HGNC Symbol;Acc:HGNC:17167]	protein_coding	0.312169	2.81797e-12
ENSG00000108405	P2RX1	17	-	3896592	3916476	purinergic receptor P2X 1 [Source:HGNC Symbol;Acc:HGNC:8533]	protein_coding	0.312143	5.5648e-07
ENSG00000211448	DIO2	14	-	80197526	80387757	iodothyronine deiodinase 2 [Source:HGNC Symbol;Acc:HGNC:2884]	protein_coding	0.312126	0
ENSG00000134827	TCN1	11	-	59852800	59866489	transcobalamin 1 [Source:HGNC Symbol;Acc:HGNC:11652]	protein_coding	0.311954	9.70176e-26
ENSG00000244482	LILRA6	19	-	54236592	54242791	leukocyte immunoglobulin like receptor A6 [Source:HGNC Symbol;Acc:HGNC:15495]	protein_coding	0.311854	1.48987e-08
ENSG00000197208	SLC22A4	5	+	132294394	132344190	solute carrier family 22 member 4 [Source:HGNC Symbol;Acc:HGNC:10968]	protein_coding	0.311574	2.30408e-18
ENSG00000241106	HLA-DOB	6	-	32812763	32820466	major histocompatibility complex, class II, DO beta [Source:HGNC Symbol;Acc:HGNC:4937]	protein_coding	0.311404	1.42473e-14
ENSG00000145685	LHFPL2	5	-	78485215	78770021	LHFPL tetraspan subfamily member 2 [Source:HGNC Symbol;Acc:HGNC:6588]	protein_coding	0.311336	1.40443e-247
ENSG00000135362	PRR5L	11	+	36296288	36465204	proline rich 5 like [Source:HGNC Symbol;Acc:HGNC:25878]	protein_coding	0.310988	2.16256e-50
ENSG00000072110	ACTN1	14	-	68874128	68979440	actinin alpha 1 [Source:HGNC Symbol;Acc:HGNC:163]	protein_coding	0.310893	0
ENSG00000082684	SEMA5B	3	-	122909082	123028605	semaphorin 5B [Source:HGNC Symbol;Acc:HGNC:10737]	protein_coding	0.31054	1.31401e-19
ENSG00000101347	SAMHD1	20	-	36890229	36951843	SAM and HD domain containing deoxynucleoside triphosphate triphosphohydrolase 1 [Source:HGNC Symbol;Acc:HGNC:15925]	protein_coding	0.310056	0
ENSG00000151702	FLI1	11	+	128686535	128813267	Fli-1 proto-oncogene, ETS transcription factor [Source:HGNC Symbol;Acc:HGNC:3749]	protein_coding	0.309754	8.21479e-185
ENSG00000105967	TFEC	7	-	115935148	116159896	transcription factor EC [Source:HGNC Symbol;Acc:HGNC:11754]	protein_coding	0.30944	3.93174e-49
ENSG00000273802	H2BC8	6	-	26215159	26216692	H2B clustered histone 8 [Source:HGNC Symbol;Acc:HGNC:4746]	protein_coding	0.309244	4.76226e-07
ENSG00000284693	LINC02606	1	-	9425094	9440564	long intergenic non-protein coding RNA 2606 [Source:HGNC Symbol;Acc:HGNC:54047]	lncRNA	0.309096	3.05213e-07
ENSG00000019991	HGF	7	-	81699010	81770438	hepatocyte growth factor [Source:HGNC Symbol;Acc:HGNC:4893]	protein_coding	0.309038	7.15988e-72
ENSG00000160678	S100A1	1	+	153627926	153632039	S100 calcium binding protein A1 [Source:HGNC Symbol;Acc:HGNC:10486]	protein_coding	0.309034	3.50678e-09
ENSG00000110900	TSPAN11	12	+	30926428	30996602	tetraspanin 11 [Source:HGNC Symbol;Acc:HGNC:30795]	protein_coding	0.308924	3.07022e-102
ENSG00000172458	IL17D	13	+	20702127	20723098	interleukin 17D [Source:HGNC Symbol;Acc:HGNC:5984]	protein_coding	0.30881	3.96425e-41
ENSG00000188373	C10orf99	10	+	84173801	84185294	chromosome 10 open reading frame 99 [Source:HGNC Symbol;Acc:HGNC:31428]	protein_coding	0.308293	1.1941e-19
ENSG00000171310	CHST11	12	+	104455295	104762014	carbohydrate sulfotransferase 11 [Source:HGNC Symbol;Acc:HGNC:17422]	protein_coding	0.307854	9.11188e-64
ENSG00000139194	RBP5	12	-	7115736	7128889	retinol binding protein 5 [Source:HGNC Symbol;Acc:HGNC:15847]	protein_coding	0.307703	3.62757e-25
ENSG00000180834	MAP6D1	3	-	183815922	183825594	MAP6 domain containing 1 [Source:HGNC Symbol;Acc:HGNC:25753]	protein_coding	0.307602	2.76604e-10
ENSG00000168461	RAB31	18	+	9708275	9862551	RAB31, member RAS oncogene family [Source:HGNC Symbol;Acc:HGNC:9771]	protein_coding	0.307497	0
ENSG00000284308	C2orf81	2	-	74414176	74421591	chromosome 2 open reading frame 81 [Source:HGNC Symbol;Acc:HGNC:34350]	protein_coding	0.307288	3.06108e-16
ENSG00000104490	NCALD	8	-	101686542	102124907	neurocalcin delta [Source:HGNC Symbol;Acc:HGNC:7655]	protein_coding	0.307267	5.53669e-78
ENSG00000261175	LINC02188	16	+	86710122	86742083	long intergenic non-protein coding RNA 2188 [Source:HGNC Symbol;Acc:HGNC:53050]	lncRNA	0.30711	2.67572e-15
ENSG00000161381	PLXDC1	17	-	39063313	39154394	plexin domain containing 1 [Source:HGNC Symbol;Acc:HGNC:20945]	protein_coding	0.306862	1.364e-140
ENSG00000158445	KCNB1	20	-	49293394	49484297	potassium voltage-gated channel subfamily B member 1 [Source:HGNC Symbol;Acc:HGNC:6231]	protein_coding	0.306417	4.46853e-10
ENSG00000110799	VWF	12	-	5948877	6124770	von Willebrand factor [Source:HGNC Symbol;Acc:HGNC:12726]	protein_coding	0.306157	0
ENSG00000141506	PIK3R5	17	-	8878911	8965712	phosphoinositide-3-kinase regulatory subunit 5 [Source:HGNC Symbol;Acc:HGNC:30035]	protein_coding	0.306064	1.26216e-39
ENSG00000122121	XPNPEP2	X	+	129738974	129769536	X-prolyl aminopeptidase 2 [Source:HGNC Symbol;Acc:HGNC:12823]	protein_coding	0.305947	1.74205e-14
ENSG00000130988	RGN	X	+	47078355	47093314	regucalcin [Source:HGNC Symbol;Acc:HGNC:9989]	protein_coding	0.305451	1.94643e-12
ENSG00000179542	SLITRK4	X	-	143622790	143636101	SLIT and NTRK like family member 4 [Source:HGNC Symbol;Acc:HGNC:23502]	protein_coding	0.304745	2.73419e-15
ENSG00000122862	SRGN	10	+	69088103	69104805	serglycin [Source:HGNC Symbol;Acc:HGNC:9361]	protein_coding	0.304417	0
ENSG00000107281	NPDC1	9	-	137039463	137046179	neural proliferation, differentiation and control 1 [Source:HGNC Symbol;Acc:HGNC:7899]	protein_coding	0.304329	1.80476e-239
ENSG00000186074	CD300LF	17	-	74694311	74712978	CD300 molecule like family member f [Source:HGNC Symbol;Acc:HGNC:29883]	protein_coding	0.303725	2.9346e-09
ENSG00000176692	FOXC2	16	+	86566829	86569728	forkhead box C2 [Source:HGNC Symbol;Acc:HGNC:3801]	protein_coding	0.303504	1.89126e-82
ENSG00000174944	P2RY14	3	-	151212117	151278542	purinergic receptor P2Y14 [Source:HGNC Symbol;Acc:HGNC:16442]	protein_coding	0.303292	4.2567e-62
ENSG00000222009	BTBD19	1	+	44808482	44815585	BTB domain containing 19 [Source:HGNC Symbol;Acc:HGNC:27145]	protein_coding	0.303087	3.51892e-16
ENSG00000160255	ITGB2	21	-	44885953	44931989	integrin subunit beta 2 [Source:HGNC Symbol;Acc:HGNC:6155]	protein_coding	0.302857	1.37299e-213
ENSG00000131378	RFTN1	3	-	16313574	16514026	raftlin, lipid raft linker 1 [Source:HGNC Symbol;Acc:HGNC:30278]	protein_coding	0.30277	2.14448e-148
ENSG00000108691	CCL2	17	+	34255218	34257203	C-C motif chemokine ligand 2 [Source:HGNC Symbol;Acc:HGNC:10618]	protein_coding	0.302729	7.75645e-104
ENSG00000268895	A1BG-AS1	19	+	58347718	58355455	A1BG antisense RNA 1 [Source:HGNC Symbol;Acc:HGNC:37133]	lncRNA	0.302715	1.15206e-13
ENSG00000091986	CCDC80	3	-	112596797	112649530	coiled-coil domain containing 80 [Source:HGNC Symbol;Acc:HGNC:30649]	protein_coding	0.302484	0
ENSG00000229124	VIM-AS1	10	-	17214239	17229985	VIM antisense RNA 1 [Source:HGNC Symbol;Acc:HGNC:44879]	lncRNA	0.301836	1.03803e-14
ENSG00000099260	PALMD	1	+	99646113	99694541	palmdelphin [Source:HGNC Symbol;Acc:HGNC:15846]	protein_coding	0.30179	1.56971e-229
ENSG00000196839	ADA	20	-	44619522	44652233	adenosine deaminase [Source:HGNC Symbol;Acc:HGNC:186]	protein_coding	0.30137	1.05395e-47
ENSG00000214357	NEURL1B	5	+	172641263	172691540	neuralized E3 ubiquitin protein ligase 1B [Source:HGNC Symbol;Acc:HGNC:35422]	protein_coding	0.300989	5.76122e-215
ENSG00000119147	ECRG4	2	+	106063246	106078155	ECRG4 augurin precursor [Source:HGNC Symbol;Acc:HGNC:24642]	protein_coding	0.300983	1.62078e-22
ENSG00000145113	MUC4	3	-	195746765	195811973	mucin 4, cell surface associated [Source:HGNC Symbol;Acc:HGNC:7514]	protein_coding	0.300733	2.10993e-65
ENSG00000237187	NR2F1-AS1	5	-	93360779	93585649	NR2F1 antisense RNA 1 [Source:HGNC Symbol;Acc:HGNC:48622]	lncRNA	0.300615	3.44171e-16
ENSG00000204291	COL15A1	9	+	98943179	99070792	collagen type XV alpha 1 chain [Source:HGNC Symbol;Acc:HGNC:2192]	protein_coding	0.300566	0
ENSG00000257529	RPL36A-HNRNPH2	X	+	101391011	101412297	RPL36A-HNRNPH2 readthrough [Source:HGNC Symbol;Acc:HGNC:48349]	protein_coding	0.300256	1.4041e-21
ENSG00000123610	TNFAIP6	2	+	151357592	151380046	TNF alpha induced protein 6 [Source:HGNC Symbol;Acc:HGNC:11898]	protein_coding	0.299888	1.73746e-69
ENSG00000180767	CHST13	3	+	126524155	126543291	carbohydrate sulfotransferase 13 [Source:HGNC Symbol;Acc:HGNC:21755]	protein_coding	0.299622	1.65536e-08
ENSG00000112559	MDFI	6	+	41636882	41654246	MyoD family inhibitor [Source:HGNC Symbol;Acc:HGNC:6967]	protein_coding	0.299435	7.72373e-114
ENSG00000105427	CNFN	19	-	42387019	42390297	cornifelin [Source:HGNC Symbol;Acc:HGNC:30183]	protein_coding	0.299415	2.54793e-10
ENSG00000247774	PCED1B-AS1	12	-	47205898	47216456	PCED1B antisense RNA 1 [Source:HGNC Symbol;Acc:HGNC:44166]	lncRNA	0.299065	7.36293e-30
ENSG00000137463	MGARP	4	-	139266165	139280225	mitochondria localized glutamic acid rich protein [Source:HGNC Symbol;Acc:HGNC:29969]	protein_coding	0.298824	0
ENSG00000163106	HPGDS	4	-	94298535	94342876	hematopoietic prostaglandin D synthase [Source:HGNC Symbol;Acc:HGNC:17890]	protein_coding	0.29881	2.29952e-42
ENSG00000204136	GGTA1P	9	-	121444991	121500027	glycoprotein alpha-galactosyltransferase 1, pseudogene [Source:HGNC Symbol;Acc:HGNC:4253]	transcribed_unitary_pseudogene	0.298579	2.06251e-118
ENSG00000169474	SPRR1A	1	+	152985231	152985500	small proline rich protein 1A [Source:HGNC Symbol;Acc:HGNC:11259]	protein_coding	0.297815	2.43141e-29
ENSG00000188677	PARVB	22	+	43999211	44172939	parvin beta [Source:HGNC Symbol;Acc:HGNC:14653]	protein_coding	0.297186	4.46825e-59
ENSG00000138758	SEPTIN11	4	+	76949703	77040384	septin 11 [Source:HGNC Symbol;Acc:HGNC:25589]	protein_coding	0.296992	0
ENSG00000248690	HAS2-AS1	8	+	121639293	121994185	HAS2 antisense RNA 1 [Source:HGNC Symbol;Acc:HGNC:34340]	lncRNA	0.296803	2.46354e-11
ENSG00000180353	HCLS1	3	-	121631399	121660927	hematopoietic cell-specific Lyn substrate 1 [Source:HGNC Symbol;Acc:HGNC:4844]	protein_coding	0.296717	2.21198e-164
ENSG00000160883	HK3	5	-	176880869	176899346	hexokinase 3 [Source:HGNC Symbol;Acc:HGNC:4925]	protein_coding	0.296676	1.66244e-11
ENSG00000144596	GRIP2	3	-	14489107	14556075	glutamate receptor interacting protein 2 [Source:HGNC Symbol;Acc:HGNC:23841]	protein_coding	0.29653	4.274e-20
ENSG00000203999	LINC01270	20	+	50292709	50315488	long intergenic non-protein coding RNA 1270 [Source:HGNC Symbol;Acc:HGNC:27658]	lncRNA	0.296304	1.51136e-07
ENSG00000233251	AC007743.1	2	-	56173534	56185870	novel transcript, antisense to CCDC85A	lncRNA	0.296199	3.16224e-11
ENSG00000162545	CAMK2N1	1	-	20482391	20486210	calcium/calmodulin dependent protein kinase II inhibitor 1 [Source:HGNC Symbol;Acc:HGNC:24190]	protein_coding	0.296015	2.38232e-212
ENSG00000120833	SOCS2	12	+	93569814	93583487	suppressor of cytokine signaling 2 [Source:HGNC Symbol;Acc:HGNC:19382]	protein_coding	0.295908	5.87328e-76
ENSG00000100097	LGALS1	22	+	37675636	37679802	galectin 1 [Source:HGNC Symbol;Acc:HGNC:6561]	protein_coding	0.295571	0
ENSG00000196209	SIRPB2	20	-	1470741	1491587	signal regulatory protein beta 2 [Source:HGNC Symbol;Acc:HGNC:16247]	protein_coding	0.295444	8.5402e-10
ENSG00000102010	BMX	X	+	15464246	15556529	BMX non-receptor tyrosine kinase [Source:HGNC Symbol;Acc:HGNC:1079]	protein_coding	0.295421	5.79434e-23
ENSG00000146192	FGD2	6	+	37005646	37029069	FYVE, RhoGEF and PH domain containing 2 [Source:HGNC Symbol;Acc:HGNC:3664]	protein_coding	0.29515	4.94637e-59
ENSG00000062282	DGAT2	11	+	75759512	75801535	diacylglycerol O-acyltransferase 2 [Source:HGNC Symbol;Acc:HGNC:16940]	protein_coding	0.294977	8.34786e-13
ENSG00000164181	ELOVL7	5	-	60751791	60844274	ELOVL fatty acid elongase 7 [Source:HGNC Symbol;Acc:HGNC:26292]	protein_coding	0.294413	1.04771e-64
ENSG00000157703	SVOPL	7	-	138594285	138701362	SVOP like [Source:HGNC Symbol;Acc:HGNC:27034]	protein_coding	0.294345	4.64495e-45
ENSG00000137960	GIPC2	1	+	77979542	78138444	GIPC PDZ domain containing family member 2 [Source:HGNC Symbol;Acc:HGNC:18177]	protein_coding	0.29364	1.47763e-42
ENSG00000182752	PAPPA	9	+	116153791	116402321	pappalysin 1 [Source:HGNC Symbol;Acc:HGNC:8602]	protein_coding	0.293528	9.31225e-46
ENSG00000104450	SPAG1	8	+	100157906	100259278	sperm associated antigen 1 [Source:HGNC Symbol;Acc:HGNC:11212]	protein_coding	0.293512	2.74537e-75
ENSG00000165995	CACNB2	10	+	18140424	18543557	calcium voltage-gated channel auxiliary subunit beta 2 [Source:HGNC Symbol;Acc:HGNC:1402]	protein_coding	0.293228	7.63248e-12
ENSG00000140545	MFGE8	15	-	88898683	88913381	milk fat globule EGF and factor V/VIII domain containing [Source:HGNC Symbol;Acc:HGNC:7036]	protein_coding	0.293206	0
ENSG00000163751	CPA3	3	+	148865296	148897203	carboxypeptidase A3 [Source:HGNC Symbol;Acc:HGNC:2298]	protein_coding	0.293062	6.47216e-232
ENSG00000187116	LILRA5	19	-	54307070	54313166	leukocyte immunoglobulin like receptor A5 [Source:HGNC Symbol;Acc:HGNC:16309]	protein_coding	0.293034	8.44331e-10
ENSG00000119125	GDA	9	+	72114595	72257193	guanine deaminase [Source:HGNC Symbol;Acc:HGNC:4212]	protein_coding	0.293007	9.95197e-31
ENSG00000108950	FAM20A	17	-	68535113	68601367	FAM20A golgi associated secretory pathway pseudokinase [Source:HGNC Symbol;Acc:HGNC:23015]	protein_coding	0.292847	2.76826e-75
ENSG00000123342	MMP19	12	-	55835433	55842966	matrix metallopeptidase 19 [Source:HGNC Symbol;Acc:HGNC:7165]	protein_coding	0.292579	1.3968e-69
ENSG00000180539	C9orf139	9	+	137027464	137037957	chromosome 9 open reading frame 139 [Source:HGNC Symbol;Acc:HGNC:31426]	lncRNA	0.292211	2.11246e-11
ENSG00000092009	CMA1	14	-	24505353	24508265	chymase 1 [Source:HGNC Symbol;Acc:HGNC:2097]	protein_coding	0.291783	7.66453e-54
ENSG00000115009	CCL20	2	+	227805739	227817564	C-C motif chemokine ligand 20 [Source:HGNC Symbol;Acc:HGNC:10619]	protein_coding	0.291442	1.77492e-06
ENSG00000287382	AC110611.2	4	-	55938153	55947996	novel transcript	lncRNA	0.290992	2.50714e-06
ENSG00000115353	TACR1	2	-	75046463	75199520	tachykinin receptor 1 [Source:HGNC Symbol;Acc:HGNC:11526]	protein_coding	0.290878	2.78338e-69
ENSG00000172889	EGFL7	9	+	136658856	136672678	EGF like domain multiple 7 [Source:HGNC Symbol;Acc:HGNC:20594]	protein_coding	0.290721	2.56133e-222
ENSG00000245164	LINC00861	8	-	125859721	126292788	long intergenic non-protein coding RNA 861 [Source:HGNC Symbol;Acc:HGNC:45133]	lncRNA	0.290463	5.17341e-07
ENSG00000249464	LINC01091	4	+	123539026	123962698	long intergenic non-protein coding RNA 1091 [Source:HGNC Symbol;Acc:HGNC:27721]	lncRNA	0.289784	4.37184e-07
ENSG00000187513	GJA4	1	+	34792999	34795747	gap junction protein alpha 4 [Source:HGNC Symbol;Acc:HGNC:4278]	protein_coding	0.289483	1.59699e-62
ENSG00000164683	HEY1	8	-	79762371	79767857	hes related family bHLH transcription factor with YRPW motif 1 [Source:HGNC Symbol;Acc:HGNC:4880]	protein_coding	0.289092	1.40286e-74
ENSG00000164434	FABP7	6	+	122779716	122784074	fatty acid binding protein 7 [Source:HGNC Symbol;Acc:HGNC:3562]	protein_coding	0.289022	1.956e-06
ENSG00000075223	SEMA3C	7	-	80742538	80922359	semaphorin 3C [Source:HGNC Symbol;Acc:HGNC:10725]	protein_coding	0.288417	0
ENSG00000197959	DNM3	1	+	171841498	172418466	dynamin 3 [Source:HGNC Symbol;Acc:HGNC:29125]	protein_coding	0.288183	2.77071e-17
ENSG00000114638	UPK1B	3	+	119173517	119205143	uroplakin 1B [Source:HGNC Symbol;Acc:HGNC:12578]	protein_coding	0.288104	0
ENSG00000155629	PIK3AP1	10	-	96593315	96720514	phosphoinositide-3-kinase adaptor protein 1 [Source:HGNC Symbol;Acc:HGNC:30034]	protein_coding	0.287916	2.65892e-57
ENSG00000197905	TEAD4	12	+	2959330	3040676	TEA domain transcription factor 4 [Source:HGNC Symbol;Acc:HGNC:11717]	protein_coding	0.287515	7.91046e-28
ENSG00000226869	LHFPL3-AS1	7	-	104738597	104804107	LHFPL3 antisense RNA 1 [Source:HGNC Symbol;Acc:HGNC:40341]	lncRNA	0.287419	6.47283e-34
ENSG00000197253	TPSB2	16	-	1227272	1230184	tryptase beta 2 (gene/pseudogene) [Source:HGNC Symbol;Acc:HGNC:14120]	protein_coding	0.287072	1.13051e-132
ENSG00000108786	HSD17B1	17	+	42552922	42555214	hydroxysteroid 17-beta dehydrogenase 1 [Source:HGNC Symbol;Acc:HGNC:5210]	protein_coding	0.286898	1.71169e-11
[truncated: 1,319 more rows]
